# Supplementary material
Source: PubMed Central journal article supplement (PMC5626622)
Supplement: NIHMS896108-supplement-Supp_TableS1-4.pdf [file NIHMS896108-supplement-Supp_TableS1-4.pdf]

Supplementary Table 1 - 4C reads distribution in each sample and library complexity

*PPAR $\gamma$*  4C-seq

| Sample                     | Total no. of reads | No. reads on cis | % reads on cis | No. of HindIII sites with reads | No. HindIII sites on cis | % HindIII sites on cis |
|----------------------------|--------------------|------------------|----------------|---------------------------------|--------------------------|------------------------|
| Day 0 rep 1                | 2473742            | 1933409          | 0.78           | 40322                           | 13163                    | 0.33                   |
| Day 1 rep 1                | 2551475            | 2168903          | 0.85           | 39423                           | 15048                    | 0.38                   |
| Day 2 rep 1                | 2241053            | 1753219          | 0.78           | 56068                           | 17395                    | 0.31                   |
| Day 6 rep 1                | 1718012            | 1510120          | 0.88           | 21035                           | 7972                     | 0.38                   |
| Day 0 rep 2                | 296578             | 230273           | 0.78           | 18762                           | 7889                     | 0.42                   |
| Day 1 rep 2                | 165153             | 139584           | 0.85           | 7789                            | 4048                     | 0.52                   |
| Day 2 rep 2                | 429788             | 348133           | 0.81           | 12513                           | 5903                     | 0.47                   |
| Day 6 rep 2                | 116031             | 102524           | 0.88           | 6225                            | 2947                     | 0.47                   |
| <b>B cells</b>             | 167558             | 145526           | 0.87           | 17203                           | 9688                     | 0.56                   |
| <b>Average of both rep</b> |                    |                  |                |                                 |                          |                        |
| Day 0                      | 1385110            | 1081841          | 0.78           | 53027                           | 16005                    | 0.3                    |
| Day 1                      | 1358314            | 1154244          | 0.85           | 43852                           | 16134                    | 0.37                   |
| Day 2                      | 1335421            | 1050676          | 0.79           | 63540                           | 18987                    | 0.3                    |
| Day 6                      | 917021.5           | 806322           | 0.88           | 25653                           | 9441                     | 0.37                   |

*Lpin1* 4C-seq

| Sample                     | Total no. of reads | No. reads on cis | % reads on cis | No. of HindIII sites with reads | No. HindIII sites on cis | % HindIII sites on cis |
|----------------------------|--------------------|------------------|----------------|---------------------------------|--------------------------|------------------------|
| Day 0 rep 1                | 2146467            | 1806105          | 0.84           | 30364                           | 11555                    | 0.38                   |
| Day 1 rep 1                | 3002206            | 2409940          | 0.8            | 27774                           | 10581                    | 0.38                   |
| Day 2 rep 1                | 2191348            | 1674150          | 0.76           | 41038                           | 11232                    | 0.27                   |
| Day 6 rep 1                | 1875284            | 1213728          | 0.65           | 12278                           | 4344                     | 0.35                   |
| Day 0 rep 2                | 2395394            | 1674737          | 0.7            | 25500                           | 9150                     | 0.36                   |
| Day 1 rep 2                | 1915630            | 1458460          | 0.76           | 11974                           | 5089                     | 0.43                   |
| Day 2 rep 2                | 2317460            | 1661729          | 0.72           | 13894                           | 5469                     | 0.39                   |
| Day 6 rep 2                | 867255             | 554952           | 0.64           | 5820                            | 2335                     | 0.4                    |
| <b>B cells</b>             | 1972550            | 1598672          | 0.81           | 39318                           | 13499                    | 0.34                   |
| <b>Average of both rep</b> |                    |                  |                |                                 |                          |                        |
| Day 0                      | 2270931            | 1740421          | 0.77           | 49099                           | 15203                    | 0.31                   |
| Day 1                      | 2458918            | 1934200          | 0.79           | 35482                           | 12303                    | 0.35                   |
| Day 2                      | 2254404            | 1667940          | 0.74           | 50089                           | 12997                    | 0.26                   |
| Day 6                      | 1371270            | 884340           | 0.64           | 16500                           | 5481                     | 0.33                   |

*lfng* 4C-seq

| Sample                     | Total no. of reads | No. reads on cis | % reads on cis | No. of HindIII sites with reads | No. HindIII sites on cis | % HindIII sites on cis |
|----------------------------|--------------------|------------------|----------------|---------------------------------|--------------------------|------------------------|
| Day 0 rep 1                | 1974525            | 1761859          | 0.89           | 56599                           | 12303                    | 0.22                   |
| Day 1 rep 1                | 1833201            | 1797657          | 0.98           | 26152                           | 7018                     | 0.27                   |
| Day 2 rep 1                | 2075226            | 1845918          | 0.89           | 72226                           | 14366                    | 0.2                    |
| Day 6 rep 1                | 1001119            | 964663           | 0.96           | 23012                           | 6382                     | 0.28                   |
| Day 0 rep 2                | 844042             | 736577           | 0.87           | 56597                           | 9060                     | 0.16                   |
| Day 1 rep 2                | 1857433            | 1751729          | 0.94           | 42310                           | 8671                     | 0.2                    |
| Day 2 rep 2                | 2040931            | 1923483          | 0.94           | 45491                           | 8599                     | 0.19                   |
| Day 6 rep 2                | 2008338            | 1955050          | 0.97           | 33180                           | 7412                     | 0.22                   |
| <b>B cells</b>             | 767419             | 725448           | 0.95           | 26076                           | 10011                    | 0.38                   |
| <b>Average of both rep</b> |                    |                  |                |                                 |                          |                        |
| Day 0                      | 1409284            | 1249218          | 0.89           | 95771                           | 15044                    | 0.16                   |
| Day 1                      | 1845317            | 1774693          | 0.96           | 58071                           | 11108                    | 0.19                   |
| Day 2                      | 2058079            | 1884701          | 0.92           | 98892                           | 16121                    | 0.16                   |
| Day 6                      | 1504729            | 1459857          | 0.97           | 47698                           | 9892                     | 0.21                   |

**% of RE with reads on each chromosome from the total RE with reads**

| pparg | day 0 | day 1 | day 2 | day 6 | B     |
|-------|-------|-------|-------|-------|-------|
| chr1  | 5.2%  | 4.6%  | 5.5%  | 5.5%  | 3.5%  |
| chr10 | 3.9%  | 3.5%  | 4.1%  | 3.9%  | 2.5%  |
| chr11 | 4.5%  | 4.5%  | 4.1%  | 3.2%  | 2.7%  |
| chr12 | 2.9%  | 2.7%  | 3.0%  | 2.6%  | 2.2%  |
| chr13 | 3.7%  | 3.5%  | 3.8%  | 3.7%  | 2.0%  |
| chr14 | 3.0%  | 2.8%  | 3.2%  | 2.9%  | 2.3%  |
| chr15 | 3.4%  | 2.9%  | 3.2%  | 2.8%  | 2.0%  |
| chr16 | 2.9%  | 2.5%  | 2.8%  | 2.5%  | 2.0%  |
| chr17 | 3.2%  | 2.9%  | 3.1%  | 2.5%  | 1.8%  |
| chr18 | 2.5%  | 2.2%  | 2.4%  | 2.1%  | 1.5%  |
| chr19 | 2.7%  | 2.5%  | 2.5%  | 2.1%  | 1.2%  |
| chr2  | 6.0%  | 5.7%  | 6.0%  | 5.3%  | 3.7%  |
| chr3  | 4.2%  | 3.5%  | 4.5%  | 4.5%  | 2.8%  |
| chr4  | 3.8%  | 3.6%  | 3.8%  | 3.3%  | 2.8%  |
| chr5  | 4.4%  | 4.0%  | 4.4%  | 4.4%  | 2.5%  |
| chr6  | 30.2% | 36.8% | 29.9% | 36.8% | 56.4% |
| chr7  | 3.3%  | 3.2%  | 3.6%  | 3.2%  | 2.3%  |
| chr8  | 4.3%  | 3.6%  | 4.2%  | 3.5%  | 2.4%  |
| chr9  | 3.7%  | 3.3%  | 3.7%  | 3.2%  | 2.4%  |
| chrX  | 2.1%  | 1.7%  | 2.3%  | 2.0%  | 1.0%  |

| lfng  | day 0 | day 1 | day 2 | day 6 | B     |
|-------|-------|-------|-------|-------|-------|
| chr1  | 7.0%  | 6.8%  | 6.8%  | 6.4%  | 5.1%  |
| chr10 | 15.7% | 19.1% | 16.3% | 20.7% | 38.4% |
| chr11 | 3.4%  | 3.3%  | 3.5%  | 3.4%  | 2.9%  |
| chr12 | 4.2%  | 4.1%  | 4.0%  | 3.9%  | 3.1%  |
| chr13 | 3.0%  | 2.8%  | 3.1%  | 2.8%  | 2.6%  |
| chr14 | 3.5%  | 3.3%  | 3.4%  | 3.3%  | 2.8%  |
| chr15 | 3.1%  | 2.9%  | 3.1%  | 2.9%  | 2.2%  |
| chr16 | 8.0%  | 7.7%  | 7.8%  | 7.7%  | 5.3%  |
| chr17 | 3.2%  | 3.0%  | 3.2%  | 3.1%  | 2.4%  |
| chr18 | 2.9%  | 2.9%  | 2.9%  | 2.6%  | 1.9%  |
| chr19 | 2.4%  | 2.3%  | 2.5%  | 2.4%  | 1.3%  |
| chr2  | 6.1%  | 5.9%  | 6.0%  | 5.7%  | 5.0%  |
| chr3  | 4.3%  | 4.0%  | 4.2%  | 3.8%  | 3.6%  |
| chr4  | 3.8%  | 3.9%  | 4.0%  | 3.7%  | 3.4%  |
| chr5  | 5.5%  | 5.3%  | 5.6%  | 5.4%  | 3.8%  |
| chr6  | 9.3%  | 8.7%  | 9.0%  | 8.7%  | 5.8%  |
| chr7  | 3.5%  | 3.4%  | 3.5%  | 3.4%  | 2.6%  |
| chr8  | 4.6%  | 4.5%  | 4.8%  | 4.4%  | 3.0%  |
| chr9  | 3.5%  | 3.5%  | 3.5%  | 3.3%  | 2.9%  |
| chrX  | 2.9%  | 2.5%  | 2.7%  | 2.4%  | 1.8%  |

| Lpin  | day 0 | day 1 | day 2 | day 6 | B     |
|-------|-------|-------|-------|-------|-------|
| chr1  | 4.6%  | 4.3%  | 4.9%  | 4.6%  | 3.9%  |
| chr10 | 3.9%  | 3.4%  | 4.0%  | 3.6%  | 3.5%  |
| chr11 | 4.0%  | 3.5%  | 4.2%  | 4.2%  | 4.4%  |
| chr12 | 31.0% | 34.7% | 25.9% | 33.2% | 34.4% |
| chr13 | 3.1%  | 2.8%  | 3.4%  | 3.2%  | 3.6%  |
| chr14 | 2.7%  | 2.6%  | 3.0%  | 2.8%  | 2.9%  |
| chr15 | 3.5%  | 3.4%  | 3.6%  | 3.5%  | 3.7%  |
| chr16 | 3.1%  | 2.9%  | 3.2%  | 2.9%  | 2.9%  |
| chr17 | 3.3%  | 2.9%  | 3.2%  | 3.2%  | 3.0%  |
| chr18 | 2.6%  | 2.6%  | 2.8%  | 2.3%  | 3.0%  |
| chr19 | 3.1%  | 3.1%  | 3.2%  | 3.0%  | 3.1%  |
| chr2  | 5.3%  | 5.0%  | 5.9%  | 5.1%  | 4.5%  |
| chr3  | 3.5%  | 3.3%  | 3.9%  | 3.3%  | 3.4%  |
| chr4  | 3.5%  | 3.5%  | 3.8%  | 3.4%  | 3.6%  |
| chr5  | 3.9%  | 3.9%  | 4.6%  | 4.0%  | 3.7%  |
| chr6  | 5.8%  | 5.7%  | 6.4%  | 5.8%  | 4.5%  |
| chr7  | 3.7%  | 3.8%  | 4.2%  | 3.5%  | 3.3%  |
| chr8  | 4.1%  | 3.7%  | 4.2%  | 3.5%  | 3.3%  |
| chr9  | 3.4%  | 3.0%  | 3.4%  | 3.2%  | 3.7%  |
| chrX  | 2.0%  | 2.1%  | 2.1%  | 1.8%  | 1.7%  |

## Number of RE with reads for each sample

| pparg | day 0 | day 1 | day 2 | day 6 | B    |  |
|-------|-------|-------|-------|-------|------|--|
| chr1  | 2760  | 2000  | 3509  | 1404  | 596  |  |
| chr10 | 2073  | 1550  | 2629  | 1012  | 430  |  |
| chr11 | 2388  | 1958  | 2583  | 818   | 470  |  |
| chr12 | 1563  | 1174  | 1902  | 667   | 385  |  |
| chr13 | 1977  | 1520  | 2445  | 944   | 345  |  |
| chr14 | 1611  | 1243  | 2028  | 734   | 399  |  |
| chr15 | 1811  | 1288  | 2005  | 713   | 346  |  |
| chr16 | 1528  | 1087  | 1780  | 648   | 348  |  |
| chr17 | 1717  | 1270  | 1944  | 652   | 303  |  |
| chr18 | 1342  | 980   | 1537  | 543   | 256  |  |
| chr19 | 1424  | 1103  | 1584  | 547   | 203  |  |
| chr2  | 3177  | 2483  | 3815  | 1359  | 637  |  |
| chr3  | 2211  | 1531  | 2828  | 1153  | 479  |  |
| chr4  | 2012  | 1593  | 2437  | 835   | 485  |  |
| chr5  | 2351  | 1755  | 2821  | 1122  | 425  |  |
| chr6  | 16005 | 16134 | 18987 | 9441  | 9688 |  |
| chr7  | 1744  | 1407  | 2275  | 822   | 391  |  |
| chr8  | 2263  | 1585  | 2667  | 899   | 407  |  |
| chr9  | 1952  | 1443  | 2321  | 823   | 417  |  |
| chrX  | 1116  | 744   | 1437  | 515   | 178  |  |

| lfng  | day 0 | day 1 | day 2 | day 6 | B     |  |
|-------|-------|-------|-------|-------|-------|--|
| chr1  | 6672  | 3955  | 6729  | 3051  | 1327  |  |
| chr10 | 15044 | 11108 | 16121 | 9892  | 10011 |  |
| chr11 | 3291  | 1935  | 3466  | 1620  | 762   |  |
| chr12 | 4007  | 2363  | 3968  | 1877  | 798   |  |
| chr13 | 2916  | 1650  | 3076  | 1315  | 688   |  |
| chr14 | 3315  | 1900  | 3376  | 1587  | 735   |  |
| chr15 | 2972  | 1674  | 3052  | 1381  | 582   |  |
| chr16 | 7678  | 4484  | 7712  | 3694  | 1383  |  |
| chr17 | 3027  | 1753  | 3138  | 1478  | 614   |  |
| chr18 | 2783  | 1690  | 2897  | 1252  | 505   |  |
| chr19 | 2338  | 1314  | 2468  | 1129  | 344   |  |
| chr2  | 5854  | 3451  | 5953  | 2706  | 1294  |  |
| chr3  | 4155  | 2316  | 4135  | 1819  | 934   |  |
| chr4  | 3614  | 2240  | 3983  | 1777  | 877   |  |
| chr5  | 5281  | 3096  | 5511  | 2557  | 1003  |  |
| chr6  | 8940  | 5062  | 8930  | 4137  | 1523  |  |
| chr7  | 3390  | 1964  | 3499  | 1604  | 677   |  |
| chr8  | 4405  | 2618  | 4780  | 2103  | 791   |  |
| chr9  | 3308  | 2026  | 3439  | 1590  | 755   |  |
| chrX  | 2775  | 1466  | 2652  | 1124  | 459   |  |

| <b>Lpin</b> | <b>day 0</b> | <b>day 1</b> | <b>day 2</b> | <b>day 6</b> | <b>B</b> |       |
|-------------|--------------|--------------|--------------|--------------|----------|-------|
| chr1        | 2276         | 1523         | 2474         |              | 753      | 1532  |
| chr10       | 1905         | 1189         | 2010         |              | 589      | 1391  |
| chr11       | 1953         | 1249         | 2080         |              | 689      | 1736  |
| chr12       | 15203        | 12303        | 12997        |              | 5481     | 13499 |
| chr13       | 1504         | 1004         | 1697         |              | 520      | 1415  |
| chr14       | 1320         | 906          | 1484         |              | 457      | 1141  |
| chr15       | 1740         | 1216         | 1814         |              | 581      | 1440  |
| chr16       | 1502         | 1032         | 1616         |              | 483      | 1141  |
| chr17       | 1600         | 1043         | 1625         |              | 524      | 1163  |
| chr18       | 1263         | 923          | 1420         |              | 378      | 1195  |
| chr19       | 1529         | 1084         | 1599         |              | 493      | 1237  |
| chr2        | 2600         | 1765         | 2948         |              | 840      | 1762  |
| chr3        | 1705         | 1156         | 1956         |              | 540      | 1329  |
| chr4        | 1729         | 1246         | 1898         |              | 553      | 1419  |
| chr5        | 1927         | 1385         | 2295         |              | 665      | 1450  |
| chr6        | 2848         | 2017         | 3219         |              | 963      | 1752  |
| chr7        | 1815         | 1339         | 2110         |              | 583      | 1284  |
| chr8        | 2006         | 1300         | 2097         |              | 579      | 1299  |
| chr9        | 1675         | 1063         | 1710         |              | 530      | 1435  |
| chrX        | 997          | 735          | 1038         |              | 296      | 678   |

Supplementary Table 2 -

Contact domains analysis for each bait in adipogenic cells throughout the differentiation and in B cells

| sample | Total Domains | Cis Domains | Trans Domains | Genome Cov all (Mb) |
|--------|---------------|-------------|---------------|---------------------|
|--------|---------------|-------------|---------------|---------------------|

*PPAR $\gamma$*

|         |     |    |     |        |
|---------|-----|----|-----|--------|
| Day 0   | 491 | 47 | 444 | 129.79 |
| Day 1   | 488 | 39 | 449 | 132.35 |
| Day 2   | 473 | 44 | 429 | 119.15 |
| Day 6   | 405 | 47 | 358 | 87.09  |
|         |     |    |     |        |
| B cells | 279 | 35 | 244 | 64.27  |

*Lpin1*

|         |     |    |     |       |
|---------|-----|----|-----|-------|
| Day 0   | 459 | 27 | 432 | 92.15 |
| Day 1   | 410 | 26 | 384 | 88.32 |
| Day 2   | 462 | 31 | 431 | 97.75 |
| Day 6   | 398 | 27 | 371 | 84.30 |
|         |     |    |     |       |
| B cells | 450 | 30 | 420 | 96.14 |

*Ifn $\gamma$*

|         |     |    |     |        |
|---------|-----|----|-----|--------|
| Day 0   | 351 | 29 | 322 | 100.95 |
| Day 1   | 323 | 26 | 297 | 95.54  |
| Day 2   | 340 | 37 | 303 | 100.18 |
| Day 6   | 321 | 35 | 286 | 81.28  |
|         |     |    |     |        |
| B cells | 297 | 30 | 267 | 69.46  |

Supplementary Table 3

Adipogenic genes, termed by GO, within PPAR $\gamma$  and Lpin1 contact domains

| Genomic position |           |           | Gene symbol   | PPAR $\gamma$ contacts | Lpin1 contacts |
|------------------|-----------|-----------|---------------|------------------------|----------------|
| chr1             | 64579377  | 64651122  | Creb1         |                        | V              |
| chr1             | 92849684  | 92850589  | Prlh          |                        | V              |
| chr1             | 145846467 | 145851279 | Rgs2          |                        |                |
| chr1             | 151947253 | 151955142 | Ptgs2         |                        |                |
| chr1             | 195128187 | 195170072 | Lamb3         | V                      | V              |
| chr10            | 24361216  | 24431908  | Enpp1         |                        |                |
| chr10            | 38685320  | 38829994  | Lama4         |                        | V              |
| chr10            | 62781752  | 62801783  | Sirt1         |                        | V              |
| chr10            | 67000616  | 67004936  | Egr2          |                        |                |
| chr10            | 67558340  | 67741474  | Arid5b        |                        |                |
| chr10            | 75385968  | 75395208  | Mmp11         |                        |                |
| chr10            | 87321800  | 87399792  | Igf1          |                        |                |
| chr10            | 106954415 | 107157083 | Ptprq         |                        |                |
| chr10            | 110601857 | 110734303 | Osbp18        |                        |                |
| chr10            | 119798330 | 119913991 | Hmga2         | V                      | V              |
| chr10            | 120471059 | 120537698 | Wif1          |                        |                |
| chr11            | 32247810  | 32328183  | Sh3pxd2b      |                        |                |
| chr11            | 59061543  | 59104253  | Wnt3a         |                        |                |
| chr11            | 68939878  | 68962617  | Aloxe3        |                        |                |
| chr11            | 69755787  | 69761692  | Slc2a4        |                        |                |
| chr11            | 83560441  | 83566148  | 1100001G20Rik |                        |                |
| chr11            | 97223864  | 97259856  | Socs7         | V                      | V              |
| chr11            | 98013468  | 98054607  | Med1          |                        |                |
| chr12            | 3426856   | 3506849   | Asxl2         |                        | V              |
| chr12            | 15798532  | 15823591  | Trib2         |                        |                |
| chr12            | 16542474  | 16596576  | Lpin1         |                        |                |
| chr12            | 25778663  | 25780957  | Id2           |                        | V              |
| chr12            | 40759877  | 40764574  | Arl4a         |                        |                |
| chr12            | 72410870  | 72421094  | Dact1         |                        |                |
| chr12            | 85771667  | 85791900  | Aldh6a1       | V                      |                |
| chr12            | 86940054  | 86980828  | Jdp2          | V                      |                |
| chr12            | 113892031 | 113912487 | Akt1          | V                      |                |
| chr13            | 48356795  | 48359405  | Id4           |                        |                |
| chr13            | 53562249  | 53568149  | Msx2          |                        |                |
| chr13            | 119503505 | 119581380 | Fgf10         |                        |                |
| chr14            | 29318658  | 29338701  | Wnt5a         | V                      |                |
| chr14            | 45902761  | 45938247  | Ero1l         | V                      | V              |
| chr14            | 102053183 | 102095342 | Uchl3         |                        |                |
| chr15            | 8239823   | 8394463   | Nipbl         |                        | V              |
| chr15            | 40486587  | 40936138  | Zfpm2         |                        |                |
| chr15            | 76845916  | 76881098  | Mb            | V                      |                |
| chr15            | 79489656  | 79498090  | Cby1          |                        |                |
| chr15            | 98602182  | 98608581  | Wnt10b        | V                      |                |
| chr15            | 98620287  | 98624261  | Wnt1          | V                      |                |
| chr15            | 103144325 | 103170517 | Zfp385a       | V                      | V              |

|       |           |           |               |   |   |
|-------|-----------|-----------|---------------|---|---|
| chr16 | 10783901  | 10785629  | Socs1         |   |   |
| chr16 | 14705951  | 14709475  | Snai2         |   |   |
| chr16 | 15887378  | 15889638  | Cebpd         |   | V |
| chr16 | 23146608  | 23158041  | Adipoq        |   |   |
| chr16 | 30065442  | 30067882  | Hes1          |   | V |
| chr16 | 33185156  | 33243398  | Osbp11        | V | V |
| chr16 | 38089086  | 38246165  | Gsk3b         |   |   |
| chr16 | 90738568  | 90750021  | Mrap          |   |   |
| chr17 | 13200704  | 13210985  | Sod2          |   |   |
| chr17 | 25702837  | 25707631  | Sox8          |   |   |
| chr17 | 26275630  | 26332756  | Axin1         | V | V |
| chr17 | 28369698  | 28438414  | Ppard         | V |   |
| chr17 | 34335139  | 34338399  | Psmb8         |   |   |
| chr17 | 43526414  | 43596506  | Gpr116        |   |   |
| chr17 | 46434431  | 46440220  | Dlk2          |   |   |
| chr17 | 47624998  | 47639236  | Taf8          |   |   |
| chr17 | 56259100  | 56261369  | Lrg1          |   |   |
| chr18 | 62337366  | 62339635  | Adrb2         |   | V |
| chr18 | 73732358  | 73752232  | Mex3c         |   | V |
| chr19 | 3584824   | 3686564   | Lrp5          | V | V |
| chr19 | 5453162   | 5457563   | Ccdc85b       | V |   |
| chr19 | 8911956   | 8923173   | Bscl2         |   | V |
| chr19 | 38862617  | 38893727  | Noc3l         |   |   |
| chr19 | 44468939  | 44482199  | Scd1          | V | V |
| chr19 | 55816299  | 56008145  | Tcf7l2        | V | V |
| chr19 | 56796861  | 56799352  | Adrb1         | V |   |
| chr2  | 9778704   | 9800227   | Gata3         |   |   |
| chr2  | 70802619  | 70893663  | Mettl8        |   |   |
| chr2  | 71624995  | 71696484  | Itga6         | V | V |
| chr2  | 73654565  | 73730696  | Atf2          |   |   |
| chr2  | 80252126  | 80287553  | Frzb          |   |   |
| chr2  | 133377894 | 133388632 | Bmp2          |   |   |
| chr2  | 134611899 | 135300994 | Plcb1         | V |   |
| chr2  | 136907186 | 136942256 | Jag1          |   |   |
| chr2  | 152163160 | 152169796 | Trib3         |   |   |
| chr2  | 153171874 | 153229743 | Asxl1         |   |   |
| chr2  | 158328347 | 158333934 | Adig          |   |   |
| chr2  | 167514414 | 167515932 | Cebpb         | V | V |
| chr3  | 10204342  | 10208576  | Fabp4         |   | V |
| chr3  | 27315083  | 27609361  | Fndc3b        |   |   |
| chr3  | 36762027  | 36951955  | 4932438A13Rik |   |   |
| chr3  | 37211475  | 37220373  | Bbs12         |   |   |
| chr3  | 57259565  | 57379832  | Wwtr1         |   | V |
| chr3  | 83570242  | 83578236  | Sfrp2         | V |   |
| chr3  | 94737004  | 94748680  | Selenbp1      |   |   |
| chr4  | 13670448  | 13822202  | Runx1t1       |   | V |
| chr4  | 55540008  | 55545347  | Klf4          | V |   |
| chr4  | 124795657 | 124805125 | Zc3h12a       |   |   |
| chr4  | 128814303 | 128821837 | Fndc5         |   | V |
| chr4  | 153690233 | 154010982 | Prdm16        |   |   |



|      |           |           |         |   |   |
|------|-----------|-----------|---------|---|---|
| chr5 | 28397951  | 28405202  | Insig1  |   | V |
| chr5 | 33590371  | 33617653  | Ctbp1   | V | V |
| chr5 | 100982751 | 101001224 | Plac8   |   |   |
| chr5 | 114062363 | 114100399 | Cmklr1  |   |   |
| chr5 | 125497522 | 125659584 | Ncor2   |   |   |
| chr5 | 136694018 | 136720773 | Sh2b2   | V |   |
| chr5 | 139899132 | 139903754 | Gper1   | V |   |
| chr5 | 150214380 | 150234278 | Medag   |   |   |
| chr6 | 29010220  | 29023876  | Lep     |   |   |
| chr6 | 48519696  | 48522669  | Rarres2 |   |   |
| chr6 | 53523367  | 53645826  | Creb5   | V | V |
| chr6 | 70794520  | 70855234  | Eif2ak3 |   |   |
| chr6 | 85537524  | 85652745  | Alms1   | V |   |
| chr6 | 88148657  | 88157026  | Gata2   | V | V |
| chr6 | 115311238 | 115440419 | Pparg   |   | V |
| chr6 | 118452581 | 118512274 | Ankrd26 |   | V |
| chr6 | 119382548 | 119494365 | Wnt5b   |   |   |
| chr6 | 134396495 | 134516931 | Lrp6    | V |   |
| chr6 | 134780216 | 134807901 | Crebl2  |   |   |
| chr7 | 26472020  | 26490015  | Tgfb1   |   |   |
| chr7 | 35904311  | 35906951  | Cebpa   | V | V |
| chr7 | 52462894  | 52467253  | Dkk1    | V | V |
| chr7 | 86882149  | 86887911  | Pex11a  |   |   |
| chr7 | 104698840 | 104728007 | Aamdc   | V | V |
| chr7 | 133960398 | 133973733 | Fam57b  | V | V |
| chr7 | 135390384 | 135397226 | Tgfb1i1 |   |   |
| chr7 | 140178693 | 140315166 | Ctbp2   | V | V |
| chr7 | 146082518 | 146101189 | Bnip3   |   |   |
| chr7 | 152115835 | 152125830 | Ccnd1   | V |   |
| chr8 | 3655769   | 3659818   | Retn    |   | V |
| chr8 | 24521973  | 24560104  | Sfrp1   |   |   |
| chr8 | 28336247  | 28340060  | Adrb3   |   |   |
| chr8 | 116657478 | 116676205 | Nudt7   |   |   |
| chr8 | 124806040 | 124861147 | Zfpm1   | V | V |
| chr9 | 21351337  | 21393909  | Carm1   |   | V |
| chr9 | 21639953  | 21641791  | Gm6484  |   | V |
| chr9 | 48462401  | 48644050  | Zbtb16  |   | V |
| chr9 | 108241410 | 108242673 | Gpx1    | V |   |
| chrX | 74756565  | 74905604  | Tbl1x   |   |   |

Supplementary Table 4 - Genes within *PPARγ* and *Lpin1* clusters  
**Genes within clusters of *PPARγ* dynamic chromosomal contacts**

Cluster1 **Transient Day 0**

**Adipogenic genes**

|       |           |           |       |           |           |         |
|-------|-----------|-----------|-------|-----------|-----------|---------|
| chr12 | 86687262  | 86953703  | chr12 | 86940054  | 86980828  | Jdp2    |
| chr12 | 113714279 | 113986356 | chr12 | 113892031 | 113912487 | Akt1    |
| chr16 | 33170530  | 33731056  | chr16 | 33185156  | 33243398  | Osbpl11 |
| chr3  | 83516061  | 83647563  | chr3  | 83570242  | 83578236  | Sfrp2   |
| chr7  | 52391814  | 52943827  | chr7  | 52462894  | 52467253  | Dkk1    |
| chr9  | 107564579 | 108353168 | chr9  | 108241410 | 108242673 | Gpx1    |

**All genes**

|      |          |          |      |          |          |               |
|------|----------|----------|------|----------|----------|---------------|
| chr1 | 38066891 | 38786936 | chr1 | 38054854 | 38112424 | Eif5b         |
| chr1 | 38066891 | 38786936 | chr1 | 38109630 | 38186507 | Rev1          |
| chr1 | 38066891 | 38786936 | chr1 | 38234171 | 38721800 | Aff3          |
| chr1 | 59704716 | 59866391 | chr1 | 59748801 | 59748854 | Snord70       |
| chr1 | 59704716 | 59866391 | chr1 | 59761651 | 59761714 | Snord11       |
| chr1 | 59704716 | 59866391 | chr1 | 59696277 | 59727678 | Sumo1         |
| chr1 | 59704716 | 59866391 | chr1 | 59741849 | 59768354 | Nop58         |
| chr1 | 59704716 | 59866391 | chr1 | 59821122 | 59934925 | Bmpr2         |
| chr1 | 74172175 | 74299998 | chr1 | 74238359 | 74241205 | Cxcr1         |
| chr1 | 74172175 | 74299998 | chr1 | 74200567 | 74207820 | Cxcr2         |
| chr1 | 74172175 | 74299998 | chr1 | 74283123 | 74314787 | Arpc2         |
| chr1 | 74172175 | 74299998 | chr1 | 74172114 | 74194804 | Rufy4         |
| chr1 | 74444174 | 74679527 | chr1 | 74634934 | 74639017 | Bcs1l         |
| chr1 | 74444174 | 74679527 | chr1 | 74455957 | 74482134 | Vil1          |
| chr1 | 74444174 | 74679527 | chr1 | 74552633 | 74577416 | Rqcd1         |
| chr1 | 74444174 | 74679527 | chr1 | 74589462 | 74612551 | Plcd4         |
| chr1 | 74444174 | 74679527 | chr1 | 74611701 | 74634602 | Zfp142        |
| chr1 | 74444174 | 74679527 | chr1 | 74640325 | 74647971 | Rnf25         |
| chr1 | 74444174 | 74679527 | chr1 | 74648028 | 74683467 | Stk36         |
| chr1 | 74444174 | 74679527 | chr1 | 74482083 | 74590860 | Usp37         |
| chr1 | 90726250 | 90998383 | chr1 | 90912687 | 90918785 | 1700067G17Rik |
| chr1 | 90726250 | 90998383 | chr1 | 90967036 | 91050368 | Sh3bp4        |
| chr1 | 92929772 | 93192934 | chr1 | 93076398 | 93121773 | Ramp1         |

|      |           |           |      |           |           |               |
|------|-----------|-----------|------|-----------|-----------|---------------|
| chr1 | 92929772  | 93192934  | chr1 | 93146895  | 93182602  | Ube2f         |
| chr1 | 92929772  | 93192934  | chr1 | 92895303  | 93025521  | Lrrfip1       |
| chr1 | 92929772  | 93192934  | chr1 | 93041679  | 93067372  | Rbm44         |
| chr1 | 93347991  | 93958516  | chr1 | 93391244  | 93425884  | Traf3ip1      |
| chr1 | 93347991  | 93958516  | chr1 | 93437141  | 93456167  | Asb1          |
| chr1 | 93347991  | 93958516  | chr1 | 93698053  | 93744604  | Twist2        |
| chr1 | 93347991  | 93958516  | chr1 | 93829331  | 94044970  | Hdac4         |
| chr1 | 93347991  | 93958516  | chr1 | 93312558  | 93355905  | Per2          |
| chr1 | 93980926  | 94352587  | chr1 | 94336295  | 94370335  | Ndufa10       |
| chr1 | 93980926  | 94352587  | chr1 | 93829331  | 94044970  | Hdac4         |
| chr1 | 133303722 | 133431592 | chr1 | 133181827 | 133423938 | Srgap2        |
| chr1 | 133303722 | 133431592 | chr1 | 133424565 | 133436449 | Fam72a        |
| chr1 | 133868261 | 134386183 | chr1 | 134094664 | 134094761 | Mir135b       |
| chr1 | 133868261 | 134386183 | chr1 | 133859491 | 133879549 | Slc45a3       |
| chr1 | 133868261 | 134386183 | chr1 | 133904181 | 133922261 | Elk4          |
| chr1 | 133868261 | 134386183 | chr1 | 134010123 | 134036262 | Cdk18         |
| chr1 | 133868261 | 134386183 | chr1 | 134088012 | 134153959 | Lemd1         |
| chr1 | 133868261 | 134386183 | chr1 | 134195202 | 134203934 | Klhdc8a       |
| chr1 | 133868261 | 134386183 | chr1 | 134252891 | 134287858 | Tmcc2         |
| chr1 | 133868261 | 134386183 | chr1 | 134373943 | 134402242 | Rbbp5         |
| chr1 | 133868261 | 134386183 | chr1 | 133923197 | 133964639 | Mfsd4         |
| chr1 | 133868261 | 134386183 | chr1 | 134314029 | 134363536 | Dstyk         |
| chr1 | 133868261 | 134386183 | chr1 | 134212701 | 134230065 | Nuak2         |
| chr1 | 134821537 | 135274665 | chr1 | 135027742 | 135036377 | Ppp1r15b      |
| chr1 | 134821537 | 135274665 | chr1 | 135223788 | 135226299 | Kiss1         |
| chr1 | 134821537 | 135274665 | chr1 | 134776931 | 134836582 | Lrrn2         |
| chr1 | 134821537 | 135274665 | chr1 | 134886421 | 134921925 | Mdm4          |
| chr1 | 134821537 | 135274665 | chr1 | 135142673 | 135200012 | Plekha6       |
| chr1 | 134821537 | 135274665 | chr1 | 135146428 | 135166385 | Gm19461       |
| chr1 | 134821537 | 135274665 | chr1 | 135206399 | 135219603 | Golt1a        |
| chr1 | 134821537 | 135274665 | chr1 | 135247142 | 135256900 | Ren2          |
| chr1 | 134821537 | 135274665 | chr1 | 135247250 | 135256896 | Ren1          |
| chr1 | 134821537 | 135274665 | chr1 | 134942588 | 135005265 | Pik3c2b       |
| chr1 | 134821537 | 135274665 | chr1 | 135260148 | 135276895 | Etnk2         |
| chr1 | 136266062 | 136612570 | chr1 | 136282516 | 136287560 | 4933406M09Rik |
| chr1 | 136266062 | 136612570 | chr1 | 136302566 | 136308315 | Cyb5r1        |
| chr1 | 136266062 | 136612570 | chr1 | 136437521 | 136443599 | 4931440L10Rik |
| chr1 | 136266062 | 136612570 | chr1 | 136352131 | 136387450 | Klhl12        |
| chr1 | 136266062 | 136612570 | chr1 | 136391236 | 136404461 | Rabif         |
| chr1 | 136266062 | 136612570 | chr1 | 136456754 | 136529455 | Kdm5b         |
| chr1 | 136266062 | 136612570 | chr1 | 136543257 | 136645994 | Syt2          |
| chr1 | 136266062 | 136612570 | chr1 | 136312043 | 136328918 | Adipor1       |
| chr1 | 180831541 | 180982795 | chr1 | 180459255 | 180862988 | Kif26b        |
| chr1 | 180831541 | 180982795 | chr1 | 180885169 | 181448134 | Smyd3         |
| chr1 | 192805678 | 192973154 | chr1 | 192849229 | 192853660 | A230020J21Rik |
| chr1 | 192805678 | 192973154 | chr1 | 192860700 | 192866820 | 1700022P22Rik |
| chr1 | 192805678 | 192973154 | chr1 | 192922292 | 192932822 | Batf3         |

|       |           |           |       |           |           |               |
|-------|-----------|-----------|-------|-----------|-----------|---------------|
| chr1  | 192805678 | 192973154 | chr1  | 192829710 | 192850069 | Mfsd7b        |
| chr1  | 192805678 | 192973154 | chr1  | 192869708 | 192886811 | Tatdn3        |
| chr1  | 192805678 | 192973154 | chr1  | 192886899 | 192908437 | Nsl1          |
| chr10 | 39404061  | 39533072  | chr10 | 39341216  | 39451813  | E130307A14Rik |
| chr10 | 39404061  | 39533072  | chr10 | 39451965  | 39595011  | Rev3l         |
| chr10 | 40224558  | 40618958  | chr10 | 40290167  | 40323938  | Slc22a16      |
| chr10 | 40224558  | 40618958  | chr10 | 40349816  | 40369737  | Ddo           |
| chr10 | 40224558  | 40618958  | chr10 | 40551426  | 40602949  | Cdc40         |
| chr10 | 40224558  | 40618958  | chr10 | 40403087  | 40530889  | Mettl24       |
| chr10 | 40224558  | 40618958  | chr10 | 40603339  | 40658375  | Wasf1         |
| chr10 | 59519237  | 59693519  | chr10 | 59589523  | 59589581  | Mir6906       |
| chr10 | 59519237  | 59693519  | chr10 | 59569004  | 59596661  | Spock2        |
| chr10 | 59519237  | 59693519  | chr10 | 59644275  | 59682008  | Chst3         |
| chr10 | 59519237  | 59693519  | chr10 | 59465552  | 59562738  | Ascc1         |
| chr10 | 75669331  | 75919513  | chr10 | 75670070  | 75670154  | Mir678        |
| chr10 | 75669331  | 75919513  | chr10 | 75716580  | 75724064  | S100b         |
| chr10 | 75669331  | 75919513  | chr10 | 75669966  | 75700610  | Prmt2         |
| chr10 | 75669331  | 75919513  | chr10 | 75851759  | 75864252  | 1700094J05Rik |
| chr10 | 75669331  | 75919513  | chr10 | 75911825  | 75923963  | 2610028H24Rik |
| chr10 | 75669331  | 75919513  | chr10 | 75725793  | 75808036  | Dip2a         |
| chr10 | 75669331  | 75919513  | chr10 | 75813998  | 75905657  | Pcnt          |
| chr10 | 76100987  | 76472397  | chr10 | 76171536  | 76188789  | Col6a1        |
| chr10 | 76100987  | 76472397  | chr10 | 76224598  | 76424692  | Pcbp3         |
| chr10 | 80661705  | 80878115  | chr10 | 80660914  | 80664782  | Nmrk2         |
| chr10 | 80661705  | 80878115  | chr10 | 80727466  | 80729671  | Mrpl54        |
| chr10 | 80661705  | 80878115  | chr10 | 80730916  | 80735992  | Apba3         |
| chr10 | 80661705  | 80878115  | chr10 | 80734341  | 80734432  | Mir3057       |
| chr10 | 80661705  | 80878115  | chr10 | 80783847  | 80788996  | Cactin        |
| chr10 | 80661705  | 80878115  | chr10 | 80791447  | 80797919  | Tbxa2r        |
| chr10 | 80661705  | 80878115  | chr10 | 80808790  | 80813202  | Hmg20b        |
| chr10 | 80661705  | 80878115  | chr10 | 80826768  | 80828565  | 4930404N11Rik |
| chr10 | 80661705  | 80878115  | chr10 | 80847172  | 80851097  | Dohh          |
| chr10 | 80661705  | 80878115  | chr10 | 80849091  | 80849157  | Mir6913       |
| chr10 | 80661705  | 80878115  | chr10 | 80855808  | 80857824  | 2210404O07Rik |
| chr10 | 80661705  | 80878115  | chr10 | 80657435  | 80671115  | Atcayos       |
| chr10 | 80661705  | 80878115  | chr10 | 80667257  | 80693524  | Atcay         |
| chr10 | 80661705  | 80878115  | chr10 | 80695907  | 80714868  | Zfr2          |
| chr10 | 80661705  | 80878115  | chr10 | 80715679  | 80725726  | Matk          |
| chr10 | 80661705  | 80878115  | chr10 | 80755716  | 80782719  | Pip5k1c       |
| chr10 | 80661705  | 80878115  | chr10 | 80800506  | 80806011  | Gipc3         |
| chr10 | 80661705  | 80878115  | chr10 | 80820314  | 80826780  | Mfsd12        |
| chr10 | 80661705  | 80878115  | chr10 | 80829623  | 80841115  | Fzr1          |
| chr10 | 80661705  | 80878115  | chr10 | 80858935  | 80889918  | Nfic          |
| chr10 | 80661705  | 80878115  | chr10 | 80735932  | 80754326  | Tjp3          |
| chr10 | 97814049  | 98228986  | chr10 | 97762560  | 97814501  | Gm8633        |
| chr10 | 126862342 | 127174739 | chr10 | 126951994 | 126954210 | Ndufa4l2      |
| chr10 | 126862342 | 127174739 | chr10 | 126954178 | 126959500 | Shmt2         |

|       |           |           |       |           |           |               |
|-------|-----------|-----------|-------|-----------|-----------|---------------|
| chr10 | 126862342 | 127174739 | chr10 | 126962528 | 126971615 | Nxph4         |
| chr10 | 126862342 | 127174739 | chr10 | 127097973 | 127103759 | Nab2          |
| chr10 | 126862342 | 127174739 | chr10 | 127104178 | 127105907 | 1700012D01Rik |
| chr10 | 126862342 | 127174739 | chr10 | 127161533 | 127168824 | Tac2          |
| chr10 | 126862342 | 127174739 | chr10 | 126938772 | 126945871 | Stac3         |
| chr10 | 126862342 | 127174739 | chr10 | 127080041 | 127098043 | Stat6         |
| chr10 | 126862342 | 127174739 | chr10 | 127114120 | 127138103 | Tmem194       |
| chr10 | 126862342 | 127174739 | chr10 | 127142311 | 127157996 | Myo1a         |
| chr10 | 126862342 | 127174739 | chr10 | 126975213 | 127058204 | Lrp1          |
| chr10 | 126862342 | 127174739 | chr10 | 126827366 | 126936440 | R3hdm2        |
| chr11 | 4132456   | 4276369   | chr11 | 4136787   | 4141029   | Osm           |
| chr11 | 4132456   | 4276369   | chr11 | 4157570   | 4172517   | Lif           |
| chr11 | 4132456   | 4276369   | chr11 | 4246385   | 4341085   | Hormad2       |
| chr11 | 4439317   | 4768900   | chr11 | 4638823   | 4646781   | Cabp7         |
| chr11 | 4439317   | 4768900   | chr11 | 4520277   | 4530014   | Gm11961       |
| chr11 | 4439317   | 4768900   | chr11 | 4537795   | 4583388   | Ascc2         |
| chr11 | 4439317   | 4768900   | chr11 | 4601970   | 4604347   | Uqcr10        |
| chr11 | 4439317   | 4768900   | chr11 | 4604680   | 4637669   | Zmat5         |
| chr11 | 4439317   | 4768900   | chr11 | 4380870   | 4494818   | Mtmr3         |
| chr11 | 4439317   | 4768900   | chr11 | 4665847   | 4749547   | Nf2           |
| chr11 | 62030309  | 62169142  | chr11 | 62080725  | 62094897  | Zswim7        |
| chr11 | 62030309  | 62169142  | chr11 | 62062485  | 62079954  | Adora2b       |
| chr11 | 62030309  | 62169142  | chr11 | 62094974  | 62129943  | Ttc19         |
| chr11 | 62030309  | 62169142  | chr11 | 62129927  | 62270834  | Ncor1         |
| chr11 | 62030309  | 62169142  | chr11 | 61770264  | 62036515  | Specc1        |
| chr11 | 75989496  | 76145827  | chr11 | 76015557  | 76021759  | Fam57a        |
| chr11 | 75989496  | 76145827  | chr11 | 76024072  | 76031074  | Gemin4        |
| chr11 | 75989496  | 76145827  | chr11 | 76031114  | 76032167  | Dbil5         |
| chr11 | 75989496  | 76145827  | chr11 | 76057237  | 76064124  | Rnmtl1        |
| chr11 | 75989496  | 76145827  | chr11 | 76033896  | 76057201  | Glod4         |
| chr11 | 75989496  | 76145827  | chr11 | 75859727  | 75993132  | Vps53         |
| chr11 | 75989496  | 76145827  | chr11 | 76070727  | 76212643  | Nxn           |
| chr11 | 76275952  | 76386174  | chr11 | 76230235  | 76391229  | Abr           |
| chr11 | 78383818  | 78502218  | chr11 | 78380669  | 78510927  | Nlk           |
| chr11 | 84892671  | 85071305  | chr11 | 84984597  | 84994656  | 1700125H20Rik |
| chr11 | 84892671  | 85071305  | chr11 | 85004811  | 85048622  | Appbp2        |
| chr11 | 84892671  | 85071305  | chr11 | 85048667  | 85051806  | D630032N06Rik |
| chr11 | 84892671  | 85071305  | chr11 | 84797989  | 84953457  | Usp32         |
| chr11 | 96065721  | 96274412  | chr11 | 96064767  | 96066794  | Gm11538       |
| chr11 | 96065721  | 96274412  | chr11 | 96126477  | 96126579  | Mir196a-1     |
| chr11 | 96065721  | 96274412  | chr11 | 96132643  | 96137907  | Hoxb9         |
| chr11 | 96065721  | 96274412  | chr11 | 96143218  | 96146639  | Hoxb8         |
| chr11 | 96065721  | 96274412  | chr11 | 96147959  | 96151477  | Hoxb7         |
| chr11 | 96065721  | 96274412  | chr11 | 96160484  | 96162883  | Hoxb6         |
| chr11 | 96065721  | 96274412  | chr11 | 96164825  | 96167435  | Hoxb5         |
| chr11 | 96065721  | 96274412  | chr11 | 96178478  | 96178588  | Mir10a        |
| chr11 | 96065721  | 96274412  | chr11 | 96179580  | 96182952  | Hoxb4         |

|       |           |           |       |           |           |               |
|-------|-----------|-----------|-------|-----------|-----------|---------------|
| chr11 | 96065721  | 96274412  | chr11 | 96212945  | 96215328  | Hoxb2         |
| chr11 | 96065721  | 96274412  | chr11 | 96227071  | 96229567  | Hoxb1         |
| chr11 | 96065721  | 96274412  | chr11 | 96112973  | 96125798  | Gm53          |
| chr11 | 96065721  | 96274412  | chr11 | 96184439  | 96209244  | Hoxb3         |
| chr11 | 105490252 | 105632266 | chr11 | 105451299 | 105790617 | Tanc2         |
| chr12 | 52732593  | 52856899  | chr12 | 52709527  | 52792901  | Strn3         |
| chr12 | 52732593  | 52856899  | chr12 | 52844708  | 52930523  | Hectd1        |
| chr12 | 52732593  | 52856899  | chr12 | 52791952  | 52839926  | Ap4s1         |
| chr12 | 53458021  | 54080015  | chr12 | 53700970  | 53703309  | 1700031P21Rik |
| chr12 | 53458021  | 54080015  | chr12 | 53617063  | 53668838  | Arhgap5       |
| chr12 | 53458021  | 54080015  | chr12 | 53800369  | 54252002  | Akap6         |
| chr12 | 70352585  | 70657759  | chr12 | 70473136  | 70476967  | Arf6          |
| chr12 | 70352585  | 70657759  | chr12 | 70342818  | 70384948  | Klhdc1        |
| chr12 | 70352585  | 70657759  | chr12 | 70397667  | 70411674  | Klhdc2        |
| chr12 | 70352585  | 70657759  | chr12 | 70412529  | 70458163  | Nemf          |
| chr12 | 70352585  | 70657759  | chr12 | 70565773  | 70576537  | 5830428M24Rik |
| chr12 | 71514489  | 72257719  | chr12 | 72038843  | 72065704  | Actr10        |
| chr12 | 71514489  | 72257719  | chr12 | 72092601  | 72116810  | 3110056K07Rik |
| chr12 | 71514489  | 72257719  | chr12 | 72116953  | 72200338  | Arid4a        |
| chr12 | 71514489  | 72257719  | chr12 | 72224158  | 72237662  | Timm9         |
| chr12 | 71514489  | 72257719  | chr12 | 72237834  | 72344290  | 2700049A03Rik |
| chr12 | 71514489  | 72257719  | chr12 | 71554140  | 71568611  | Tmx1          |
| chr12 | 71514489  | 72257719  | chr12 | 71926500  | 72003221  | Frmf6         |
| chr12 | 71514489  | 72257719  | chr12 | 72075609  | 72095910  | Psma3         |
| chr12 | 71514489  | 72257719  | chr12 | 72212414  | 72224209  | Tomm20l       |
| chr12 | 77295418  | 77693353  | chr12 | 77505162  | 77507923  | Hspa2         |
| chr12 | 77295418  | 77693353  | chr12 | 77545483  | 77549685  | Gm10451       |
| chr12 | 77295418  | 77693353  | chr12 | 77634120  | 77634199  | Mir5135       |
| chr12 | 77295418  | 77693353  | chr12 | 77647958  | 77648912  | Al463170      |
| chr12 | 77295418  | 77693353  | chr12 | 77356218  | 77420807  | Mthfd1        |
| chr12 | 77295418  | 77693353  | chr12 | 77425877  | 77435138  | Akap5         |
| chr12 | 77295418  | 77693353  | chr12 | 77471252  | 77489734  | Zbtb1         |
| chr12 | 77295418  | 77693353  | chr12 | 77518585  | 77540478  | Ppp1r36       |
| chr12 | 77295418  | 77693353  | chr12 | 77634546  | 77680026  | Plekhg3       |
| chr12 | 77295418  | 77693353  | chr12 | 77299676  | 77347733  | Tex21         |
| chr12 | 77295418  | 77693353  | chr12 | 77449886  | 77470547  | Zbtb25        |
| chr12 | 77295418  | 77693353  | chr12 | 77681474  | 77811534  | Sptb          |
| chr12 | 86687262  | 86953703  | chr12 | 86814850  | 86818219  | Fos           |
| chr12 | 86687262  | 86953703  | chr12 | 86681563  | 86715667  | Tmed10        |
| chr12 | 86687262  | 86953703  | chr12 | 86940054  | 86980828  | Jdp2          |
| chr12 | 87270411  | 87415218  | chr12 | 87397692  | 87419991  | Tgfb3         |
| chr12 | 87270411  | 87415218  | chr12 | 87165899  | 87394710  | Ttll5         |
| chr12 | 111732418 | 112080789 | chr12 | 111829583 | 111830889 | B930059L03Rik |
| chr12 | 111732418 | 112080789 | chr12 | 111929245 | 111934605 | Hsp90aa1      |
| chr12 | 111732418 | 112080789 | chr12 | 111839604 | 111905154 | Dync1h1       |
| chr12 | 111732418 | 112080789 | chr12 | 111905898 | 111920829 | 1700001K19Rik |
| chr12 | 111732418 | 112080789 | chr12 | 111976158 | 112033238 | Wdr20         |

|       |           |           |       |           |           |               |
|-------|-----------|-----------|-------|-----------|-----------|---------------|
| chr12 | 111732418 | 112080789 | chr12 | 111685388 | 111821284 | Ppp2r5c       |
| chr12 | 111732418 | 112080789 | chr12 | 112046007 | 112079149 | Stk30         |
| chr12 | 112131251 | 112814202 | chr12 | 112509321 | 112514637 | Amn           |
| chr12 | 112131251 | 112814202 | chr12 | 112645019 | 112650288 | A230065H16Rik |
| chr12 | 112131251 | 112814202 | chr12 | 112722819 | 112724034 | Gm266         |
| chr12 | 112131251 | 112814202 | chr12 | 112776311 | 112784964 | Eif5          |
| chr12 | 112131251 | 112814202 | chr12 | 112779156 | 112779277 | Snora28       |
| chr12 | 112131251 | 112814202 | chr12 | 112810527 | 112812613 | 2810029C07Rik |
| chr12 | 112131251 | 112814202 | chr12 | 112213562 | 112217231 | Ankrd9        |
| chr12 | 112131251 | 112814202 | chr12 | 112232607 | 112252082 | 6030440G07Rik |
| chr12 | 112131251 | 112814202 | chr12 | 112655640 | 112669394 | Exoc3l4       |
| chr12 | 112131251 | 112814202 | chr12 | 112680871 | 112693229 | Tnfaip2       |
| chr12 | 112131251 | 112814202 | chr12 | 112278008 | 112351597 | Rcor1         |
| chr12 | 112131251 | 112814202 | chr12 | 112404580 | 112505366 | Traf3         |
| chr12 | 112131251 | 112814202 | chr12 | 112531182 | 112615929 | Cdc42bpb      |
| chr12 | 112131251 | 112814202 | chr12 | 112812720 | 112894438 | Mark3         |
| chr12 | 112131251 | 112814202 | chr12 | 112127473 | 112210604 | Tecpr2        |
| chr12 | 112856323 | 112977519 | chr12 | 112907565 | 112910549 | Ckb           |
| chr12 | 112856323 | 112977519 | chr12 | 112916315 | 112922113 | Trmt61a       |
| chr12 | 112856323 | 112977519 | chr12 | 112947703 | 112951467 | Bag5          |
| chr12 | 112856323 | 112977519 | chr12 | 112812720 | 112894438 | Mark3         |
| chr12 | 112856323 | 112977519 | chr12 | 112951479 | 112993266 | Apopt1        |
| chr12 | 113714279 | 113986356 | chr12 | 113738394 | 113749371 | Tmem179       |
| chr12 | 113714279 | 113986356 | chr12 | 113897487 | 113897562 | Mir6939       |
| chr12 | 113714279 | 113986356 | chr12 | 113971532 | 113971602 | Mir6940       |
| chr12 | 113714279 | 113986356 | chr12 | 113727658 | 113738138 | A530016L24Rik |
| chr12 | 113714279 | 113986356 | chr12 | 113826994 | 113853768 | Inf2          |
| chr12 | 113714279 | 113986356 | chr12 | 113858257 | 113879566 | Adssl1        |
| chr12 | 113714279 | 113986356 | chr12 | 113883038 | 113887363 | Siva1         |
| chr12 | 113714279 | 113986356 | chr12 | 113917050 | 113920958 | Zbtb42        |
| chr12 | 113714279 | 113986356 | chr12 | 113960384 | 113984802 | Cep170b       |
| chr12 | 113714279 | 113986356 | chr12 | 113892031 | 113912487 | Akt1          |
| chr13 | 27472976  | 27596048  | chr13 | 27475213  | 27482715  | Prl2b1        |
| chr13 | 27472976  | 27596048  | chr13 | 27524549  | 27530557  | Prl8a6        |
| chr13 | 29434637  | 29918486  | chr13 | 29417174  | 29947457  | Cdkal1        |
| chr13 | 38441669  | 38673281  | chr13 | 38592143  | 38620329  | Txndc5        |
| chr13 | 38441669  | 38673281  | chr13 | 38437584  | 38591597  | Bmp6          |
| chr13 | 41334945  | 41849607  | chr13 | 41345212  | 41371946  | Smim13        |
| chr13 | 41334945  | 41849607  | chr13 | 41701584  | 41736726  | Tmem170b      |
| chr13 | 41334945  | 41849607  | chr13 | 41744811  | 41752146  | Gm5082        |
| chr13 | 41334945  | 41849607  | chr13 | 41405284  | 41582729  | Nedd9         |
| chr13 | 45726376  | 45888018  | chr13 | 45645124  | 46060360  | Atxn1         |
| chr13 | 55232556  | 55477145  | chr13 | 55420583  | 55423341  | Rab24         |
| chr13 | 55232556  | 55477145  | chr13 | 55423415  | 55426633  | Prelid1       |
| chr13 | 55232556  | 55477145  | chr13 | 55206669  | 55236432  | Zfp346        |
| chr13 | 55232556  | 55477145  | chr13 | 55254178  | 55270120  | Fgfr4         |
| chr13 | 55232556  | 55477145  | chr13 | 55426528  | 55431091  | Mxd3          |

|       |           |           |       |           |           |               |
|-------|-----------|-----------|-------|-----------|-----------|---------------|
| chr13 | 55232556  | 55477145  | chr13 | 55445193  | 55464144  | Lman2         |
| chr13 | 55232556  | 55477145  | chr13 | 55471092  | 55486048  | Rgs14         |
| chr13 | 55232556  | 55477145  | chr13 | 55311142  | 55419686  | Nsd1          |
| chr13 | 99160039  | 99311672  | chr13 | 99194064  | 99205020  | 2310005E17Rik |
| chr13 | 99426659  | 99697858  | chr13 | 99456192  | 99464786  | Tmem171       |
| chr13 | 99426659  | 99697858  | chr13 | 99493360  | 99585404  | Fcho2         |
| chr13 | 99426659  | 99697858  | chr13 | 99612035  | 99696339  | Tnpo1         |
| chr13 | 102484723 | 102835654 | chr13 | 102450715 | 102538172 | Pik3r1        |
| chr13 | 104638581 | 104773828 | chr13 | 104608865 | 104710594 | Erbp2ip       |
| chr13 | 113505354 | 113849592 | chr13 | 113778009 | 113780986 | Ccno          |
| chr13 | 113505354 | 113849592 | chr13 | 113826190 | 113826299 | Mir449c       |
| chr13 | 113505354 | 113849592 | chr13 | 113827626 | 113827706 | Mir449b       |
| chr13 | 113505354 | 113849592 | chr13 | 113827741 | 113827832 | Mir449a       |
| chr13 | 113505354 | 113849592 | chr13 | 113657987 | 113717588 | Skiv2l2       |
| chr13 | 113505354 | 113849592 | chr13 | 113718000 | 113759395 | Dhx29         |
| chr13 | 113505354 | 113849592 | chr13 | 113784075 | 113790602 | Mcidas        |
| chr13 | 113505354 | 113849592 | chr13 | 113825586 | 113881343 | Cdc20b        |
| chr13 | 113505354 | 113849592 | chr13 | 113832970 | 113836596 | Gpx8          |
| chr13 | 113505354 | 113849592 | chr13 | 113450973 | 113528960 | Slc38a9       |
| chr13 | 113505354 | 113849592 | chr13 | 113590984 | 113658102 | Ppap2a        |
| chr14 | 21234695  | 21795667  | chr14 | 21468323  | 21475762  | Myoz1         |
| chr14 | 21234695  | 21795667  | chr14 | 21509856  | 21509925  | Mir6946       |
| chr14 | 21234695  | 21795667  | chr14 | 21514189  | 21519419  | Fut11         |
| chr14 | 21234695  | 21795667  | chr14 | 21521233  | 21522321  | 6230400D17Rik |
| chr14 | 21234695  | 21795667  | chr14 | 21522248  | 21523647  | Chchd1        |
| chr14 | 21234695  | 21795667  | chr14 | 21274482  | 21299355  | Anxa7         |
| chr14 | 21234695  | 21795667  | chr14 | 21302085  | 21316123  | Mss51         |
| chr14 | 21234695  | 21795667  | chr14 | 21365514  | 21389902  | 1810062O18Rik |
| chr14 | 21234695  | 21795667  | chr14 | 21368133  | 21437576  | Usp54         |
| chr14 | 21234695  | 21795667  | chr14 | 21478639  | 21487528  | Synpo2l       |
| chr14 | 21234695  | 21795667  | chr14 | 21526773  | 21542841  | Zswim8        |
| chr14 | 21234695  | 21795667  | chr14 | 21542951  | 21553784  | Ndst2         |
| chr14 | 21234695  | 21795667  | chr14 | 21554094  | 21613310  | Camk2g        |
| chr14 | 21234695  | 21795667  | chr14 | 21655883  | 21662610  | Plau          |
| chr14 | 21234695  | 21795667  | chr14 | 21213411  | 21271447  | Ttc18         |
| chr14 | 21234695  | 21795667  | chr14 | 21318535  | 21365795  | Ppp3cb        |
| chr14 | 21234695  | 21795667  | chr14 | 21493542  | 21514072  | Sec24c        |
| chr14 | 21234695  | 21795667  | chr14 | 21748654  | 21852895  | Vcl           |
| chr14 | 24930589  | 25073255  | chr14 | 24953174  | 25065142  | Dlg5          |
| chr14 | 25238799  | 25364697  | chr14 | 25309902  | 25315368  | Rps24         |
| chr14 | 25238799  | 25364697  | chr14 | 25267915  | 25306268  | Polr3a        |
| chr14 | 25616018  | 26411137  | chr14 | 25959280  | 25962727  | 4930572O13Rik |
| chr14 | 25616018  | 26411137  | chr14 | 26353924  | 26354009  | Mir3075       |
| chr14 | 25616018  | 26411137  | chr14 | 26406289  | 26410147  | 4931406H21Rik |
| chr14 | 25616018  | 26411137  | chr14 | 26278670  | 26486233  | Zmiz1         |
| chr14 | 27314299  | 27516936  | chr14 | 27483602  | 27489332  | Pde12         |
| chr14 | 27314299  | 27516936  | chr14 | 27489032  | 27489094  | Mir7672       |



|       |           |           |       |           |           |          |
|-------|-----------|-----------|-------|-----------|-----------|----------|
| chr14 | 27314299  | 27516936  | chr14 | 27457682  | 27476744  | Arf4     |
| chr14 | 27314299  | 27516936  | chr14 | 27393343  | 27453808  | Dennd6a  |
| chr14 | 27314299  | 27516936  | chr14 | 27232660  | 27353226  | Slmap    |
| chr14 | 27637828  | 27752967  | chr14 | 27707789  | 27728443  | Asb14    |
| chr14 | 27637828  | 27752967  | chr14 | 27732173  | 27783737  | Appl1    |
| chr14 | 29722574  | 29822926  | chr14 | 29718128  | 30535050  | Cacna2d3 |
| chr14 | 32491392  | 32627744  | chr14 | 32513200  | 32643601  | Ankrd28  |
| chr14 | 32742914  | 33027142  | chr14 | 32893702  | 32898878  | Dph3     |
| chr14 | 32742914  | 33027142  | chr14 | 32842288  | 32871512  | Galnt15  |
| chr14 | 32742914  | 33027142  | chr14 | 32955208  | 32971512  | Msemb    |
| chr14 | 32742914  | 33027142  | chr14 | 32973072  | 32993041  | Ncoa4    |
| chr14 | 32742914  | 33027142  | chr14 | 32993351  | 33015077  | Timm23   |
| chr14 | 32742914  | 33027142  | chr14 | 32898913  | 32916389  | Oxnad1   |
| chr14 | 32742914  | 33027142  | chr14 | 33015156  | 33110735  | Parg     |
| chr14 | 65533365  | 65661197  | chr14 | 65568881  | 65658672  | Ints9    |
| chr14 | 65533365  | 65661197  | chr14 | 65441054  | 65568684  | Hmbox1   |
| chr14 | 69826290  | 70166057  | chr14 | 69947763  | 69955194  | Gm16677  |
| chr14 | 69826290  | 70166057  | chr14 | 70092054  | 70092127  | Mir6950  |
| chr14 | 69826290  | 70166057  | chr14 | 69908454  | 69912356  | Synb     |
| chr14 | 69826290  | 70166057  | chr14 | 69955207  | 69984799  | Entpd4   |
| chr14 | 69826290  | 70166057  | chr14 | 70009282  | 70095641  | Loxl2    |
| chr14 | 69826290  | 70166057  | chr14 | 70097110  | 70107387  | R3hcc1   |
| chr14 | 69826290  | 70166057  | chr14 | 69859907  | 69903160  | Slc25a37 |
| chr14 | 69826290  | 70166057  | chr14 | 70116785  | 70132377  | Chmp7    |
| chr14 | 79375698  | 79526936  | chr14 | 79248984  | 79602117  | Vwa8     |
| chr14 | 121252441 | 121355635 | chr14 | 121310415 | 121347266 | Ipo5     |
| chr14 | 121673909 | 121915516 | chr14 | 121685562 | 121778452 | Stk24    |
| chr14 | 121673909 | 121915516 | chr14 | 121858842 | 121904476 | Slc15a1  |
| chr14 | 121673909 | 121915516 | chr14 | 121434795 | 121682948 | Farp1    |
| chr14 | 122212040 | 122392964 | chr14 | 122310655 | 122314996 | Gpr18    |
| chr14 | 122212040 | 122392964 | chr14 | 122351552 | 122364415 | Gpr183   |
| chr14 | 122212040 | 122392964 | chr14 | 122277827 | 122420257 | Ubac2    |
| chr15 | 6863722   | 7196067   | chr15 | 7079571   | 7147489   | Lifr     |
| chr15 | 6863722   | 7196067   | chr15 | 7156119   | 7348304   | Egflam   |
| chr15 | 7533133   | 7798241   | chr15 | 7761010   | 7787575   | Gdnf     |
| chr15 | 55226994  | 55343517  | chr15 | 55139304  | 55352358  | Col14a1  |
| chr15 | 78305529  | 78524281  | chr15 | 78353775  | 78360081  | C1qtnf6  |
| chr15 | 78305529  | 78524281  | chr15 | 78367444  | 78374775  | Sstr3    |
| chr15 | 78305529  | 78524281  | chr15 | 78310978  | 78325496  | Il2rb    |
| chr15 | 78305529  | 78524281  | chr15 | 78389598  | 78403213  | Rac2     |
| chr15 | 78305529  | 78524281  | chr15 | 78427476  | 78452449  | Cyth4    |
| chr15 | 78305529  | 78524281  | chr15 | 78500436  | 78548543  | Elfn2    |
| chr15 | 79089051  | 79407279  | chr15 | 79205657  | 79205730  | Mir1943  |
| chr15 | 79089051  | 79407279  | chr15 | 79088624  | 79115939  | Baiap2l2 |
| chr15 | 79089051  | 79407279  | chr15 | 79116657  | 79158801  | Pla2g6   |
| chr15 | 79089051  | 79407279  | chr15 | 79178107  | 79189506  | Maff     |
| chr15 | 79089051  | 79407279  | chr15 | 79191113  | 79233733  | Tmem184b |

|       |          |          |       |          |          |               |
|-------|----------|----------|-------|----------|----------|---------------|
| chr15 | 79089051 | 79407279 | chr15 | 79248281 | 79272487 | Csnk1e        |
| chr15 | 79089051 | 79407279 | chr15 | 79314143 | 79335671 | Kcnj4         |
| chr15 | 79089051 | 79407279 | chr15 | 79346837 | 79358169 | Kdelr3        |
| chr15 | 79089051 | 79407279 | chr15 | 79358125 | 79377171 | Ddx17         |
| chr15 | 79089051 | 79407279 | chr15 | 79391927 | 79435539 | Dmc1          |
| chr15 | 79855175 | 80180444 | chr15 | 79908210 | 79913836 | Rpl3          |
| chr15 | 79855175 | 80180444 | chr15 | 79908932 | 79909009 | Snord83b      |
| chr15 | 79855175 | 80180444 | chr15 | 79913288 | 79913336 | Snord43       |
| chr15 | 79855175 | 80180444 | chr15 | 80085613 | 80087975 | Atf4          |
| chr15 | 79855175 | 80180444 | chr15 | 80091043 | 80094736 | Rps19bp1      |
| chr15 | 79855175 | 80180444 | chr15 | 79921763 | 79949931 | Syng1         |
| chr15 | 79855175 | 80180444 | chr15 | 79963583 | 79992132 | Tab1          |
| chr15 | 79855175 | 80180444 | chr15 | 80004150 | 80045949 | Mgat3         |
| chr15 | 79855175 | 80180444 | chr15 | 80064509 | 80083801 | Mief1         |
| chr15 | 79855175 | 80180444 | chr15 | 80117667 | 80228722 | Cacna1i       |
| chr15 | 97208480 | 97391118 | chr15 | 97077537 | 97216122 | Pced1b        |
| chr16 | 4592898  | 4702804  | chr16 | 4639944  | 4651166  | Vasn          |
| chr16 | 4592898  | 4702804  | chr16 | 4594712  | 4615957  | Glis2         |
| chr16 | 4592898  | 4702804  | chr16 | 4616465  | 4624946  | Pam16         |
| chr16 | 4592898  | 4702804  | chr16 | 4626883  | 4679720  | Coro7         |
| chr16 | 4592898  | 4702804  | chr16 | 4684069  | 4707693  | Dnaja3        |
| chr16 | 17505117 | 17796539 | chr16 | 17572110 | 17576764 | Slc7a4        |
| chr16 | 17505117 | 17796539 | chr16 | 17646562 | 17650831 | Ccdc74a       |
| chr16 | 17505117 | 17796539 | chr16 | 17489783 | 17507575 | Aifm3         |
| chr16 | 17505117 | 17796539 | chr16 | 17509063 | 17526423 | Lztr1         |
| chr16 | 17505117 | 17796539 | chr16 | 17528074 | 17531145 | Thap7         |
| chr16 | 17505117 | 17796539 | chr16 | 17544557 | 17561340 | 4930451C15Rik |
| chr16 | 17505117 | 17796539 | chr16 | 17619446 | 17644923 | Smpd4         |
| chr16 | 17505117 | 17796539 | chr16 | 17759713 | 17793475 | Klhl22        |
| chr16 | 17505117 | 17796539 | chr16 | 17561977 | 17572105 | P2rx6         |
| chr16 | 17505117 | 17796539 | chr16 | 17651300 | 17723040 | Med15         |
| chr16 | 32017034 | 32514377 | chr16 | 32099887 | 32108140 | Cep19         |
| chr16 | 32017034 | 32514377 | chr16 | 32179885 | 32187030 | Bex6          |
| chr16 | 32017034 | 32514377 | chr16 | 32247312 | 32257169 | Wdr53         |
| chr16 | 32017034 | 32514377 | chr16 | 32267535 | 32267669 | Mir1946a      |
| chr16 | 32017034 | 32514377 | chr16 | 32271694 | 32274865 | Smco1         |
| chr16 | 32017034 | 32514377 | chr16 | 32475663 | 32487965 | Slc51a        |
| chr16 | 32017034 | 32514377 | chr16 | 32016375 | 32079428 | Pak2          |
| chr16 | 32017034 | 32514377 | chr16 | 32084501 | 32099813 | Pigx          |
| chr16 | 32017034 | 32514377 | chr16 | 32142910 | 32165562 | Nrros         |
| chr16 | 32017034 | 32514377 | chr16 | 32277546 | 32301525 | Rnf168        |
| chr16 | 32017034 | 32514377 | chr16 | 32400591 | 32408313 | Tm4sf19       |
| chr16 | 32017034 | 32514377 | chr16 | 32419787 | 32428978 | Tctex1d2      |
| chr16 | 32017034 | 32514377 | chr16 | 32431006 | 32475151 | Pcyt1a        |
| chr16 | 32017034 | 32514377 | chr16 | 32230197 | 32247111 | Fbxo45        |
| chr16 | 32017034 | 32514377 | chr16 | 32332337 | 32393833 | Ubxn7         |
| chr16 | 32017034 | 32514377 | chr16 | 32496366 | 32507300 | Zdhc19        |

|       |          |          |       |          |          |               |
|-------|----------|----------|-------|----------|----------|---------------|
| chr16 | 32759676 | 33053501 | chr16 | 32804973 | 32810532 | Gm933         |
| chr16 | 32759676 | 33053501 | chr16 | 32777504 | 32797521 | Muc20         |
| chr16 | 32759676 | 33053501 | chr16 | 32821787 | 32868452 | 1700021K19Rik |
| chr16 | 32759676 | 33053501 | chr16 | 32914185 | 33016115 | Lrch3         |
| chr16 | 32759676 | 33053501 | chr16 | 32735971 | 32782476 | Muc4          |
| chr16 | 32759676 | 33053501 | chr16 | 32877869 | 32909049 | Fyttd1        |
| chr16 | 32759676 | 33053501 | chr16 | 33014355 | 33056272 | Iqcg          |
| chr16 | 33170530 | 33731056 | chr16 | 33379939 | 33380822 | 1700007L15Rik |
| chr16 | 33170530 | 33731056 | chr16 | 33185156 | 33243398 | Osbpl11       |
| chr16 | 33170530 | 33731056 | chr16 | 33251541 | 33299648 | Snx4          |
| chr16 | 33170530 | 33731056 | chr16 | 33380860 | 33503989 | Zfp148        |
| chr16 | 33170530 | 33731056 | chr16 | 33684551 | 33768281 | Heg1          |
| chr16 | 33170530 | 33731056 | chr16 | 33518414 | 33664221 | Slc12a8       |
| chr16 | 33791389 | 34122505 | chr16 | 33955097 | 33967089 | Umps          |
| chr16 | 33791389 | 34122505 | chr16 | 33794122 | 33820013 | Muc13         |
| chr16 | 33791389 | 34122505 | chr16 | 33829750 | 33949424 | Itgb5         |
| chr16 | 33791389 | 34122505 | chr16 | 33969158 | 34514113 | Kalrn         |
| chr16 | 92397291 | 93132677 | chr16 | 92478986 | 92497610 | 2410124H12Rik |
| chr16 | 92397291 | 93132677 | chr16 | 92392197 | 92466391 | Rcan1         |
| chr16 | 92397291 | 93132677 | chr16 | 92498391 | 92541486 | Clic6         |
| chr16 | 92397291 | 93132677 | chr16 | 92601710 | 92826319 | Runx1         |
| chr17 | 14694245 | 14970497 | chr17 | 14802506 | 14831269 | Thbs2         |
| chr17 | 14694245 | 14970497 | chr17 | 14955678 | 15080129 | Wdr27         |
| chr17 | 15483848 | 15620405 | chr17 | 15487776 | 15491425 | Gm10510       |
| chr17 | 15483848 | 15620405 | chr17 | 15504317 | 15512787 | Dll1          |
| chr17 | 15483848 | 15620405 | chr17 | 15533165 | 15570545 | Fam120b       |
| chr17 | 15483848 | 15620405 | chr17 | 15612684 | 15635240 | Psmb1         |
| chr17 | 25533819 | 25689074 | chr17 | 25608534 | 25613539 | Tekt4         |
| chr17 | 25533819 | 25689074 | chr17 | 25626819 | 25634233 | Sstr5         |
| chr17 | 25533819 | 25689074 | chr17 | 25511231 | 25570728 | Cacna1h       |
| chr17 | 44525614 | 44713167 | chr17 | 44632935 | 44951746 | Runx2         |
| chr17 | 83864944 | 83965684 | chr17 | 83901256 | 83913673 | Cox7a2l       |
| chr17 | 83864944 | 83965684 | chr17 | 83750270 | 83879699 | Eml4          |
| chr17 | 87483712 | 87842963 | chr17 | 87591555 | 87594282 | C330024C12Rik |
| chr17 | 87483712 | 87842963 | chr17 | 87674225 | 87682154 | 4833418N02Rik |
| chr17 | 87483712 | 87842963 | chr17 | 87507018 | 87536925 | Socs5         |
| chr17 | 87483712 | 87842963 | chr17 | 87653782 | 87665287 | Mcf2          |
| chr17 | 87483712 | 87842963 | chr17 | 87832740 | 87846275 | Calm2         |
| chr17 | 87483712 | 87842963 | chr17 | 87682225 | 87781110 | Ttc7          |
| chr17 | 87483712 | 87842963 | chr17 | 87788910 | 87827081 | 1700011E24Rik |
| chr18 | 6886272  | 7018248  | chr18 | 6934963  | 7004777  | Mkx           |
| chr18 | 10245264 | 10463940 | chr18 | 10325176 | 10562939 | Greb1l        |
| chr18 | 33494899 | 33693518 | chr18 | 33623816 | 33634364 | Gm10549       |
| chr18 | 33494899 | 33693518 | chr18 | 33596672 | 33623683 | Nrep          |
| chr18 | 35067977 | 35479273 | chr18 | 35062438 | 35091657 | Etf1          |
| chr18 | 35067977 | 35479273 | chr18 | 35097068 | 35114005 | Hspa9         |
| chr18 | 35067977 | 35479273 | chr18 | 35368662 | 35374678 | Lrrtm2        |

|       |          |          |       |          |          |               |
|-------|----------|----------|-------|----------|----------|---------------|
| chr18 | 35067977 | 35479273 | chr18 | 35278565 | 35414429 | Ctnna1        |
| chr18 | 35067977 | 35479273 | chr18 | 35426049 | 35658579 | Sil1          |
| chr18 | 61199460 | 61850227 | chr18 | 61277121 | 61277185 | Mir6983       |
| chr18 | 61199460 | 61850227 | chr18 | 61807478 | 61807548 | Mir145        |
| chr18 | 61199460 | 61850227 | chr18 | 61808849 | 61808912 | Mir143        |
| chr18 | 61199460 | 61850227 | chr18 | 61265225 | 61290793 | Csf1r         |
| chr18 | 61199460 | 61850227 | chr18 | 61290930 | 61336704 | Hmgxb3        |
| chr18 | 61199460 | 61850227 | chr18 | 61356507 | 61371250 | Slc26a2       |
| chr18 | 61199460 | 61850227 | chr18 | 61380152 | 61449372 | Pde6a         |
| chr18 | 61199460 | 61850227 | chr18 | 61629878 | 61644261 | A530050N04Rik |
| chr18 | 61199460 | 61850227 | chr18 | 61653447 | 61696190 | Arhgef37      |
| chr18 | 61199460 | 61850227 | chr18 | 61799306 | 61807157 | Gm20748       |
| chr18 | 61199460 | 61850227 | chr18 | 61805531 | 61825192 | Mir143hg      |
| chr18 | 61199460 | 61850227 | chr18 | 61847588 | 61852191 | Il17b         |
| chr18 | 61199460 | 61850227 | chr18 | 61204803 | 61244721 | Pdgfrb        |
| chr18 | 61199460 | 61850227 | chr18 | 61457789 | 61560085 | Ppargc1b      |
| chr18 | 61199460 | 61850227 | chr18 | 61715235 | 61747953 | Csnk1a1       |
| chr18 | 66134965 | 66384507 | chr18 | 66378917 | 66378987 | Mir694        |
| chr18 | 66134965 | 66384507 | chr18 | 66140392 | 66162289 | Lman1         |
| chr18 | 66134965 | 66384507 | chr18 | 66216509 | 66451492 | Ccbe1         |
| chr19 | 36696715 | 36835358 | chr19 | 36806220 | 36811094 | Ppp1r3c       |
| chr19 | 36696715 | 36835358 | chr19 | 36693907 | 36763969 | 1500017E21Rik |
| chr19 | 45670439 | 45856618 | chr19 | 45801044 | 45805048 | 4933429K18Rik |
| chr19 | 45670439 | 45856618 | chr19 | 45811287 | 45817374 | Fgf8          |
| chr19 | 45670439 | 45856618 | chr19 | 45822223 | 45824053 | Npm3          |
| chr19 | 45670439 | 45856618 | chr19 | 45652746 | 45734683 | Fbxw4         |
| chr19 | 45670439 | 45856618 | chr19 | 45824748 | 45857781 | Mgea5         |
| chr2  | 25772863 | 26079691 | chr2  | 25992326 | 25996026 | C330006A16Rik |
| chr2  | 25772863 | 26079691 | chr2  | 26055731 | 26062076 | Lhx3          |
| chr2  | 25772863 | 26079691 | chr2  | 25719373 | 25773793 | Kcnt1         |
| chr2  | 25772863 | 26079691 | chr2  | 25852477 | 25877280 | Ubac1         |
| chr2  | 25772863 | 26079691 | chr2  | 25782357 | 25838802 | Camsap1       |
| chr2  | 25772863 | 26079691 | chr2  | 25911055 | 25978331 | Nacc2         |
| chr2  | 25772863 | 26079691 | chr2  | 26064649 | 26092940 | Qsox2         |
| chr2  | 32640506 | 32876160 | chr2  | 32817231 | 32819565 | Rpl12         |
| chr2  | 32640506 | 32876160 | chr2  | 32818820 | 32818938 | Snora65       |
| chr2  | 32640506 | 32876160 | chr2  | 32643126 | 32702757 | Stxbp1        |
| chr2  | 32640506 | 32876160 | chr2  | 32780734 | 32816775 | Lrsam1        |
| chr2  | 32640506 | 32876160 | chr2  | 32828508 | 32837576 | Slc2a8        |
| chr2  | 32640506 | 32876160 | chr2  | 32731653 | 32780773 | Fam129b       |
| chr2  | 32640506 | 32876160 | chr2  | 32841885 | 32942724 | Garnl3        |
| chr2  | 33410048 | 33586093 | chr2  | 33496712 | 33501183 | C130021I20Rik |
| chr2  | 33410048 | 33586093 | chr2  | 33420055 | 33496031 | Lmx1b         |
| chr2  | 33410048 | 33586093 | chr2  | 33585475 | 33743466 | Mvb12b        |
| chr2  | 34093758 | 34296820 | chr2  | 34027428 | 34227556 | Pbx3          |
| chr2  | 34093758 | 34296820 | chr2  | 34287544 | 34480470 | Mapkap1       |
| chr2  | 34770243 | 34875765 | chr2  | 34798777 | 34817292 | Traf1         |

|      |           |           |      |           |           |               |
|------|-----------|-----------|------|-----------|-----------|---------------|
| chr2 | 34770243  | 34875765  | chr2 | 34838850  | 34916961  | Hc            |
| chr2 | 35007410  | 35270383  | chr2 | 35209737  | 35223249  | 4930568D16Rik |
| chr2 | 35007410  | 35270383  | chr2 | 35035724  | 35056640  | Rab14         |
| chr2 | 35007410  | 35270383  | chr2 | 35169509  | 35192529  | Stom          |
| chr2 | 35007410  | 35270383  | chr2 | 35231081  | 35252694  | 4930402F06Rik |
| chr2 | 35007410  | 35270383  | chr2 | 34965011  | 35034342  | Cep110        |
| chr2 | 35007410  | 35270383  | chr2 | 35111878  | 35163422  | Gsn           |
| chr2 | 35007410  | 35270383  | chr2 | 35255698  | 35316945  | Ggta1         |
| chr2 | 38326694  | 38518918  | chr2 | 38443565  | 38499426  | Psemb7        |
| chr2 | 38326694  | 38518918  | chr2 | 38367216  | 38443010  | Nek6          |
| chr2 | 50233989  | 50347936  | chr2 | 50152329  | 50289487  | Gm13483       |
| chr2 | 60674604  | 60869055  | chr2 | 60802432  | 60813208  | Gm13582       |
| chr2 | 60674604  | 60869055  | chr2 | 60590009  | 60801261  | Rbms1         |
| chr2 | 69498153  | 69713837  | chr2 | 69699618  | 69709903  | Ssb           |
| chr2 | 69498153  | 69713837  | chr2 | 69485311  | 69505626  | Bbs5          |
| chr2 | 69498153  | 69713837  | chr2 | 69508176  | 69522296  | Klhl41        |
| chr2 | 69498153  | 69713837  | chr2 | 69524880  | 69550663  | Fastkd1       |
| chr2 | 69498153  | 69713837  | chr2 | 69561144  | 69592116  | Ppig          |
| chr2 | 69498153  | 69713837  | chr2 | 69627793  | 69635225  | Phospho2      |
| chr2 | 69498153  | 69713837  | chr2 | 69660426  | 69674708  | Klhl23        |
| chr2 | 69498153  | 69713837  | chr2 | 69709251  | 69723661  | Mettl5        |
| chr2 | 69498153  | 69713837  | chr2 | 69596113  | 69627543  | Ccdc173       |
| chr2 | 71096397  | 71248002  | chr2 | 71049762  | 71101359  | Dync1i2       |
| chr2 | 71096397  | 71248002  | chr2 | 71227316  | 71279679  | Hat1          |
| chr2 | 71096397  | 71248002  | chr2 | 71112351  | 71205611  | Slc25a12      |
| chr2 | 91508240  | 91639798  | chr2 | 91490274  | 91512477  | Arhgap1       |
| chr2 | 91508240  | 91639798  | chr2 | 91514768  | 91550749  | Atg13         |
| chr2 | 91508240  | 91639798  | chr2 | 91551106  | 91561723  | Harbi1        |
| chr2 | 91508240  | 91639798  | chr2 | 91570294  | 91759006  | Ambra1        |
| chr2 | 121010954 | 121306929 | chr2 | 121184376 | 121189473 | Ckmt1         |
| chr2 | 121010954 | 121306929 | chr2 | 121264762 | 121268337 | Ell3          |
| chr2 | 121010954 | 121306929 | chr2 | 121274963 | 121279162 | Serf2         |
| chr2 | 121010954 | 121306929 | chr2 | 121276912 | 121282500 | Serinc4       |
| chr2 | 121010954 | 121306929 | chr2 | 121282823 | 121284176 | Hypk          |
| chr2 | 121010954 | 121306929 | chr2 | 120996941 | 121024505 | Tubgcp4       |
| chr2 | 121010954 | 121306929 | chr2 | 121022464 | 121097122 | Trp53bp1      |
| chr2 | 121010954 | 121306929 | chr2 | 121115337 | 121136568 | Map1a         |
| chr2 | 121010954 | 121306929 | chr2 | 121136296 | 121176749 | Ppip5k1       |
| chr2 | 121010954 | 121306929 | chr2 | 121189462 | 121206676 | Strc          |
| chr2 | 121010954 | 121306929 | chr2 | 121220090 | 121239528 | Catsper2      |
| chr2 | 121010954 | 121306929 | chr2 | 121287401 | 121299759 | Mfap1b        |
| chr2 | 121010954 | 121306929 | chr2 | 121239637 | 121264422 | Pdia3         |
| chr2 | 156522928 | 156658517 | chr2 | 156540274 | 156546645 | 4930405A21Rik |
| chr2 | 156522928 | 156658517 | chr2 | 156601199 | 156607393 | Myl9          |
| chr2 | 156522928 | 156658517 | chr2 | 156546700 | 156590099 | Dlgap4        |
| chr2 | 156522928 | 156658517 | chr2 | 156439432 | 156590099 | Dlgap4        |
| chr3 | 52935234  | 53061478  | chr3 | 52845468  | 53065601  | Lhfp          |

|      |           |           |      |           |           |               |
|------|-----------|-----------|------|-----------|-----------|---------------|
| chr3 | 54174828  | 54434422  | chr3 | 54165028  | 54194963  | Postn         |
| chr3 | 65848674  | 65992005  | chr3 | 65857479  | 66100759  | Veph1         |
| chr3 | 83516061  | 83647563  | chr3 | 83570242  | 83578236  | Sfrp2         |
| chr3 | 83516061  | 83647563  | chr3 | 83640193  | 83645530  | Tlr2          |
| chr3 | 96278873  | 96448261  | chr3 | 96329107  | 96333139  | Hfe2          |
| chr3 | 96278873  | 96448261  | chr3 | 96361879  | 96365780  | Txnip         |
| chr3 | 96278873  | 96448261  | chr3 | 96439279  | 96449304  | Pex11b        |
| chr3 | 96278873  | 96448261  | chr3 | 96359690  | 96370724  | Gm15441       |
| chr3 | 96278873  | 96448261  | chr3 | 96381796  | 96398081  | Polr3gl       |
| chr3 | 96278873  | 96448261  | chr3 | 96400558  | 96403701  | Ankrd34a      |
| chr3 | 96278873  | 96448261  | chr3 | 96405055  | 96429275  | Lix1l         |
| chr3 | 96278873  | 96448261  | chr3 | 96410584  | 96433742  | 6330549D23Rik |
| chr3 | 96278873  | 96448261  | chr3 | 96433850  | 96437714  | Rbm8a         |
| chr3 | 101923468 | 102226252 | chr3 | 101890377 | 101950435 | Casq2         |
| chr3 | 101923468 | 102226252 | chr3 | 102066327 | 102092694 | A230001M10Rik |
| chr3 | 101923468 | 102226252 | chr3 | 101959822 | 102008616 | Vangl1        |
| chr3 | 107581338 | 107688961 | chr3 | 107680147 | 107695818 | Eps8l3        |
| chr3 | 121562505 | 121723145 | chr3 | 121656243 | 121719071 | Arhgap29      |
| chr3 | 122126185 | 122248109 | chr3 | 122244542 | 122244599 | Mir7657       |
| chr3 | 122126185 | 122248109 | chr3 | 122122697 | 122233100 | Bcar3         |
| chr3 | 122126185 | 122248109 | chr3 | 122241636 | 122322632 | Fnbp1l        |
| chr3 | 137193052 | 137414520 | chr3 | 137213008 | 137215586 | Gm4861        |
| chr3 | 137193052 | 137414520 | chr3 | 137286635 | 137291296 | Ddit4l        |
| chr3 | 143979763 | 144203757 | chr3 | 144094070 | 144233180 | Hs2st1        |
| chr3 | 144901829 | 145245789 | chr3 | 145239171 | 145268209 | Znhit6        |
| chr3 | 144901829 | 145245789 | chr3 | 144955435 | 145214969 | Col24a1       |
| chr4 | 95397093  | 95581845  | chr4 | 95224197  | 95593630  | Fggy          |
| chr4 | 107986733 | 108212425 | chr4 | 108072821 | 108079318 | Gpx7          |
| chr4 | 107986733 | 108212425 | chr4 | 108040381 | 108056260 | Fam159a       |
| chr4 | 107986733 | 108212425 | chr4 | 108132030 | 108232020 | Zcchc11       |
| chr4 | 107986733 | 108212425 | chr4 | 108000756 | 108013323 | Selrc1        |
| chr4 | 136417921 | 136542253 | chr4 | 136436060 | 136442092 | C1qb          |
| chr4 | 136417921 | 136542253 | chr4 | 136451830 | 136454759 | C1qa          |
| chr4 | 136417921 | 136542253 | chr4 | 136485333 | 136512731 | Epha8         |
| chr4 | 136417921 | 136542253 | chr4 | 136445716 | 136448829 | C1qc          |
| chr4 | 136417921 | 136542253 | chr4 | 136535646 | 136604610 | Zbtb40        |
| chr4 | 137312553 | 137952815 | chr4 | 137719123 | 137719207 | Mir6399       |
| chr4 | 137312553 | 137952815 | chr4 | 137806325 | 137816883 | Sh2d5         |
| chr4 | 137312553 | 137952815 | chr4 | 137860652 | 137868526 | Ddost         |
| chr4 | 137312553 | 137952815 | chr4 | 137872046 | 137872115 | Mir7019       |
| chr4 | 137312553 | 137952815 | chr4 | 137950006 | 137952373 | Fam43b        |
| chr4 | 137312553 | 137952815 | chr4 | 137297645 | 137352299 | Alpl          |
| chr4 | 137312553 | 137952815 | chr4 | 137772526 | 137800597 | Hp1bp3        |
| chr4 | 137312553 | 137952815 | chr4 | 137818165 | 137857888 | Kif17         |
| chr4 | 137312553 | 137952815 | chr4 | 137869324 | 137882211 | Pink1         |
| chr4 | 137312553 | 137952815 | chr4 | 137894442 | 137923870 | Cda           |
| chr4 | 137312553 | 137952815 | chr4 | 137418151 | 137521144 | Ece1          |

|      |           |           |      |           |           |               |
|------|-----------|-----------|------|-----------|-----------|---------------|
| chr4 | 137312553 | 137952815 | chr4 | 137549370 | 137762994 | Eif4g3        |
| chr5 | 16072417  | 16219464  | chr5 | 16059367  | 16125257  | Hgf           |
| chr5 | 20969983  | 21080108  | chr5 | 21049344  | 21081720  | Lrrc17        |
| chr5 | 20969983  | 21080108  | chr5 | 20989664  | 21151423  | Fbxl13        |
| chr5 | 20969983  | 21080108  | chr5 | 20930720  | 20987942  | Fam185a       |
| chr5 | 33094172  | 33254055  | chr5 | 33078961  | 33128275  | Pisd          |
| chr5 | 33094172  | 33254055  | chr5 | 33131855  | 33196879  | Prr14l        |
| chr5 | 33094172  | 33254055  | chr5 | 33206369  | 33336882  | Depdc5        |
| chr5 | 35533825  | 35701888  | chr5 | 35621214  | 35624412  | Adra2c        |
| chr5 | 36730582  | 36894001  | chr5 | 36816318  | 36826934  | Tada2b        |
| chr5 | 36730582  | 36894001  | chr5 | 36827236  | 36830820  | Ccdc96        |
| chr5 | 36730582  | 36894001  | chr5 | 36807833  | 36816726  | Grpel1        |
| chr5 | 36730582  | 36894001  | chr5 | 36833252  | 36928875  | Tbc1d14       |
| chr5 | 36730582  | 36894001  | chr5 | 36359829  | 36740788  | Sorcs2        |
| chr5 | 111580050 | 111687805 | chr5 | 111308821 | 111718799 | Ttc28         |
| chr5 | 115434565 | 115628862 | chr5 | 115560307 | 115569355 | Acads         |
| chr5 | 115434565 | 115628862 | chr5 | 115552930 | 115560277 | Gm13826       |
| chr5 | 115434565 | 115628862 | chr5 | 115572574 | 115584984 | Unc119b       |
| chr5 | 115434565 | 115628862 | chr5 | 115618699 | 115636130 | Cabp1         |
| chr5 | 115434565 | 115628862 | chr5 | 115461532 | 115548799 | Sppl3         |
| chr5 | 115434565 | 115628862 | chr5 | 115592989 | 115608185 | Mlec          |
| chr5 | 119524876 | 119712728 | chr5 | 119558244 | 119564552 | 1700081H04Rik |
| chr5 | 119524876 | 119712728 | chr5 | 119644321 | 119650027 | Gm7538        |
| chr5 | 123976593 | 124201050 | chr5 | 124148310 | 124171053 | Zcchc8        |
| chr5 | 123976593 | 124201050 | chr5 | 124178434 | 124199423 | Rsrc2         |
| chr5 | 123976593 | 124201050 | chr5 | 123978768 | 124023024 | Vps33a        |
| chr5 | 123976593 | 124201050 | chr5 | 124029078 | 124134300 | Clip1         |
| chr5 | 123976593 | 124201050 | chr5 | 124199734 | 124271602 | Kntc1         |
| chr5 | 144138563 | 144490435 | chr5 | 144119016 | 144153477 | Grid2ip       |
| chr5 | 144138563 | 144490435 | chr5 | 144225360 | 144265310 | Daglb         |
| chr5 | 144138563 | 144490435 | chr5 | 144266348 | 144288861 | Rac1          |
| chr5 | 144138563 | 144490435 | chr5 | 144471194 | 144493149 | Usp42         |
| chr5 | 144138563 | 144490435 | chr5 | 144165498 | 144182955 | Kdelr2        |
| chr5 | 144138563 | 144490435 | chr5 | 144309573 | 144325393 | Fam220a       |
| chr5 | 144138563 | 144490435 | chr5 | 144383315 | 144471117 | Cyth3         |
| chr7 | 52391814  | 52943827  | chr7 | 52397209  | 52409908  | Aldh16a1      |
| chr7 | 52391814  | 52943827  | chr7 | 52428672  | 52428731  | Mir7055       |
| chr7 | 52391814  | 52943827  | chr7 | 52431718  | 52434967  | Gm581         |
| chr7 | 52391814  | 52943827  | chr7 | 52436364  | 52437208  | Pth2          |
| chr7 | 52391814  | 52943827  | chr7 | 52462894  | 52467253  | Dkk1          |
| chr7 | 52391814  | 52943827  | chr7 | 52489001  | 52494209  | Cd37          |
| chr7 | 52391814  | 52943827  | chr7 | 52621532  | 52623318  | Mtag2         |
| chr7 | 52391814  | 52943827  | chr7 | 52661329  | 52666752  | Kcna7         |
| chr7 | 52391814  | 52943827  | chr7 | 52669064  | 52672549  | Ntf5          |
| chr7 | 52391814  | 52943827  | chr7 | 52676315  | 52677224  | Lhb           |
| chr7 | 52391814  | 52943827  | chr7 | 52677267  | 52689834  | Ruvbl2        |
| chr7 | 52391814  | 52943827  | chr7 | 52713313  | 52715256  | Ftl1          |

|      |          |          |      |          |          |               |
|------|----------|----------|------|----------|----------|---------------|
| chr7 | 52391814 | 52943827 | chr7 | 52717064 | 52722268 | Bax           |
| chr7 | 52391814 | 52943827 | chr7 | 52778287 | 52781638 | Ppp1r15a      |
| chr7 | 52391814 | 52943827 | chr7 | 52823164 | 52830546 | 0610005C13Rik |
| chr7 | 52391814 | 52943827 | chr7 | 52869259 | 52870860 | Fgf21         |
| chr7 | 52391814 | 52943827 | chr7 | 52872975 | 52876429 | Fut1          |
| chr7 | 52391814 | 52943827 | chr7 | 52877180 | 52882612 | Izumo1        |
| chr7 | 52391814 | 52943827 | chr7 | 52895346 | 52901138 | Mamstr        |
| chr7 | 52391814 | 52943827 | chr7 | 52939783 | 52949924 | Ntn5          |
| chr7 | 52391814 | 52943827 | chr7 | 52409672 | 52415434 | Pih1d1        |
| chr7 | 52391814 | 52943827 | chr7 | 52439045 | 52460262 | Ccdc155       |
| chr7 | 52391814 | 52943827 | chr7 | 52471122 | 52488989 | Tead2         |
| chr7 | 52391814 | 52943827 | chr7 | 52538242 | 52544363 | 1700039E15Rik |
| chr7 | 52391814 | 52943827 | chr7 | 52590638 | 52594342 | Hrc           |
| chr7 | 52391814 | 52943827 | chr7 | 52594495 | 52622389 | Ppfia3        |
| chr7 | 52391814 | 52943827 | chr7 | 52623260 | 52625934 | Lin7b         |
| chr7 | 52391814 | 52943827 | chr7 | 52631823 | 52651017 | Snrnp70       |
| chr7 | 52391814 | 52943827 | chr7 | 52728932 | 52744166 | Dhdh          |
| chr7 | 52391814 | 52943827 | chr7 | 52748043 | 52765778 | Nucb1         |
| chr7 | 52391814 | 52943827 | chr7 | 52769075 | 52777973 | Tulp2         |
| chr7 | 52391814 | 52943827 | chr7 | 52781699 | 52809599 | Plekha4       |
| chr7 | 52391814 | 52943827 | chr7 | 52825522 | 52845080 | Bcat2         |
| chr7 | 52391814 | 52943827 | chr7 | 52882906 | 52894462 | Rasip1        |
| chr7 | 52391814 | 52943827 | chr7 | 52903960 | 52921764 | Fut2          |
| chr7 | 52391814 | 52943827 | chr7 | 52933056 | 52949772 | Sec1          |
| chr7 | 52391814 | 52943827 | chr7 | 52558524 | 52589150 | Trpm4         |
| chr7 | 52391814 | 52943827 | chr7 | 52690208 | 52711987 | Gys1          |
| chr7 | 52391814 | 52943827 | chr7 | 52810297 | 52822691 | Hsd17b14      |
| chr7 | 52391814 | 52943827 | chr7 | 52419290 | 52431509 | Slc17a7       |
| chr7 | 86918892 | 87073839 | chr7 | 86937126 | 86938476 | Mesp1         |
| chr7 | 86918892 | 87073839 | chr7 | 86955612 | 86958317 | Mesp2         |
| chr7 | 86918892 | 87073839 | chr7 | 87070244 | 87080150 | 2610034B18Rik |
| chr7 | 86918892 | 87073839 | chr7 | 86966688 | 86987238 | Anpep         |
| chr7 | 86918892 | 87073839 | chr7 | 86888048 | 86930836 | Wdr93         |
| chr7 | 86918892 | 87073839 | chr7 | 87020210 | 87065526 | Ap3s2         |
| chr7 | 87181418 | 87832074 | chr7 | 87377778 | 87386306 | Gdpgp1        |
| chr7 | 87181418 | 87832074 | chr7 | 87461501 | 87469340 | Rccd1         |
| chr7 | 87181418 | 87832074 | chr7 | 87169699 | 87237637 | Zfp710        |
| chr7 | 87181418 | 87832074 | chr7 | 87207595 | 87220143 | Gm21057       |
| chr7 | 87181418 | 87832074 | chr7 | 87239733 | 87260236 | Idh2          |
| chr7 | 87181418 | 87832074 | chr7 | 87331726 | 87371410 | Sema4b        |
| chr7 | 87181418 | 87832074 | chr7 | 87372045 | 87377502 | Cib1          |
| chr7 | 87181418 | 87832074 | chr7 | 87391261 | 87405707 | Ttll13        |
| chr7 | 87181418 | 87832074 | chr7 | 87406100 | 87410264 | Ngrn          |
| chr7 | 87181418 | 87832074 | chr7 | 87439336 | 87461145 | Prc1          |
| chr7 | 87181418 | 87832074 | chr7 | 87470178 | 87485105 | Unc45a        |
| chr7 | 87181418 | 87832074 | chr7 | 87488022 | 87490983 | Hddc3         |
| chr7 | 87181418 | 87832074 | chr7 | 87493982 | 87516261 | Man2a2        |



|      |           |           |      |           |           |               |
|------|-----------|-----------|------|-----------|-----------|---------------|
| chr7 | 87181418  | 87832074  | chr7 | 87522643  | 87532832  | Fes           |
| chr7 | 87181418  | 87832074  | chr7 | 87534079  | 87550317  | Furin         |
| chr7 | 87181418  | 87832074  | chr7 | 87599878  | 87680005  | Blm           |
| chr7 | 87181418  | 87832074  | chr7 | 87780902  | 87789270  | Gm15880       |
| chr7 | 87181418  | 87832074  | chr7 | 87414540  | 87436465  | Vps33b        |
| chr7 | 87181418  | 87832074  | chr7 | 87731517  | 87833763  | Crtc3         |
| chr7 | 105119954 | 105259281 | chr7 | 105068467 | 105198173 | Gdpd4         |
| chr7 | 105119954 | 105259281 | chr7 | 105199563 | 105268003 | Myo7a         |
| chr7 | 106985725 | 107211477 | chr7 | 106986078 | 107007393 | Spcc2         |
| chr7 | 106985725 | 107211477 | chr7 | 107007727 | 107066334 | Xrra1         |
| chr7 | 106985725 | 107211477 | chr7 | 107154913 | 107183236 | Chrdl2        |
| chr7 | 106985725 | 107211477 | chr7 | 107068764 | 107128968 | Rnf169        |
| chr7 | 107857295 | 107961364 | chr7 | 107855215 | 107990144 | Fam168a       |
| chr7 | 108949179 | 109063198 | chr7 | 108988501 | 108993845 | Folr2         |
| chr7 | 108949179 | 109063198 | chr7 | 109044928 | 109048057 | Anapc15       |
| chr7 | 108949179 | 109063198 | chr7 | 109054350 | 109060417 | Lamtor1       |
| chr7 | 108949179 | 109063198 | chr7 | 108966826 | 108971240 | Phox2a        |
| chr7 | 108949179 | 109063198 | chr7 | 108971145 | 108986740 | Inpp1         |
| chr7 | 108949179 | 109063198 | chr7 | 109006844 | 109019302 | Folr1         |
| chr7 | 108949179 | 109063198 | chr7 | 109061502 | 109082371 | Lrrc51        |
| chr7 | 108949179 | 109063198 | chr7 | 109048321 | 109054873 | Tomt          |
| chr7 | 116992861 | 117261603 | chr7 | 117189877 | 117190061 | Snora23       |
| chr7 | 116992861 | 117261603 | chr7 | 116942204 | 117009193 | Scube2        |
| chr7 | 116992861 | 117261603 | chr7 | 117115700 | 117129744 | Tmem41b       |
| chr7 | 116992861 | 117261603 | chr7 | 117141890 | 117150160 | 1600010M07Rik |
| chr7 | 116992861 | 117261603 | chr7 | 117205215 | 117238906 | Zfp143        |
| chr7 | 116992861 | 117261603 | chr7 | 117037294 | 117103936 | Dennd5a       |
| chr7 | 116992861 | 117261603 | chr7 | 117161938 | 117198628 | Ipo7          |
| chr7 | 117765772 | 117984427 | chr7 | 117771182 | 117773333 | Adm           |
| chr7 | 117765772 | 117984427 | chr7 | 117911719 | 117955922 | Ampd3         |
| chr7 | 117765772 | 117984427 | chr7 | 117960048 | 117987895 | Rnf141        |
| chr7 | 118092897 | 118977971 | chr7 | 118211498 | 118226544 | Eif4g2        |
| chr7 | 118092897 | 118977971 | chr7 | 118261186 | 118266189 | 1700012D14Rik |
| chr7 | 118092897 | 118977971 | chr7 | 118172464 | 118199891 | Ctr9          |
| chr7 | 118092897 | 118977971 | chr7 | 118011771 | 118125975 | Mrv1          |
| chr7 | 118092897 | 118977971 | chr7 | 118615174 | 118923491 | Galnt18       |
| chr7 | 137753755 | 137869907 | chr7 | 137720997 | 137908298 | Tacc2         |
| chr7 | 141262492 | 141750355 | chr7 | 141074882 | 141416780 | Adam12        |
| chr7 | 141262492 | 141750355 | chr7 | 141457944 | 141568511 | D7Ertd443e    |
| chr7 | 151508771 | 151882128 | chr7 | 151662659 | 151739634 | Ppfia1        |
| chr7 | 151508771 | 151882128 | chr7 | 151764227 | 151768341 | Fadd          |
| chr7 | 151508771 | 151882128 | chr7 | 151361424 | 151608580 | Shank2        |
| chr7 | 151508771 | 151882128 | chr7 | 151621628 | 151656840 | Cttn          |
| chr7 | 151508771 | 151882128 | chr7 | 151774453 | 151924497 | Ano1          |
| chr8 | 11246008  | 11395799  | chr8 | 11198422  | 11312826  | Col4a1        |
| chr8 | 11246008  | 11395799  | chr8 | 11312828  | 11449287  | Col4a2        |
| chr8 | 14598025  | 14843679  | chr8 | 14095874  | 14847686  | Dlgap2        |

|      |           |           |      |           |           |               |
|------|-----------|-----------|------|-----------|-----------|---------------|
| chr8 | 26627483  | 26748719  | chr8 | 26629230  | 26686190  | Fgfr1         |
| chr8 | 26627483  | 26748719  | chr8 | 26688961  | 26707959  | Letm2         |
| chr8 | 26627483  | 26748719  | chr8 | 26712777  | 26830139  | Whsc1l1       |
| chr8 | 34809900  | 35039392  | chr8 | 34852583  | 34858242  | Smim18        |
| chr8 | 34809900  | 35039392  | chr8 | 34842385  | 34887645  | Gtf2e2        |
| chr8 | 34809900  | 35039392  | chr8 | 34893115  | 35040335  | Rbpms         |
| chr8 | 72273893  | 72509288  | chr8 | 72404264  | 72411291  | Cilp2         |
| chr8 | 72273893  | 72509288  | chr8 | 72418080  | 72426457  | Ndufa13       |
| chr8 | 72273893  | 72509288  | chr8 | 72426113  | 72427417  | Tssk6         |
| chr8 | 72273893  | 72509288  | chr8 | 72285222  | 72298810  | Zfp866        |
| chr8 | 72273893  | 72509288  | chr8 | 72315061  | 72331647  | Atp13a1       |
| chr8 | 72273893  | 72509288  | chr8 | 72332585  | 72345769  | Gmip          |
| chr8 | 72273893  | 72509288  | chr8 | 72356602  | 72396191  | Pbx4          |
| chr8 | 72273893  | 72509288  | chr8 | 72430967  | 72520283  | Gatad2a       |
| chr8 | 72273893  | 72509288  | chr8 | 72346463  | 72355001  | Lpar2         |
| chr8 | 81640059  | 81766835  | chr8 | 81734328  | 81772482  | 1700011L22Rik |
| chr8 | 81640059  | 81766835  | chr8 | 81552335  | 81717665  | Zfp827        |
| chr8 | 109003658 | 109179606 | chr8 | 109111042 | 109118720 | 1110028F18Rik |
| chr8 | 109003658 | 109179606 | chr8 | 109127267 | 109194146 | Cdh1          |
| chr8 | 109003658 | 109179606 | chr8 | 109034751 | 109080811 | Cdh3          |
| chr9 | 42153938  | 42325180  | chr9 | 42220399  | 42280309  | Tbcel         |
| chr9 | 42153938  | 42325180  | chr9 | 42137704  | 42208012  | Tecta         |
| chr9 | 50946920  | 51199685  | chr9 | 51021794  | 51048184  | Pou2af1       |
| chr9 | 50946920  | 51199685  | chr9 | 51078362  | 51086659  | Gm684         |
| chr9 | 50946920  | 51199685  | chr9 | 51097790  | 51137022  | 1810046K07Rik |
| chr9 | 52327745  | 52543599  | chr9 | 52481136  | 52487885  | AI593442      |
| chr9 | 52327745  | 52543599  | chr9 | 52487967  | 52606877  | Gm1715        |
| chr9 | 57562205  | 58504206  | chr9 | 58004070  | 58007028  | Islr          |
| chr9 | 57562205  | 58504206  | chr9 | 58050703  | 58056615  | 1600029O15Rik |
| chr9 | 57562205  | 58504206  | chr9 | 58068956  | 58069061  | Mir6385       |
| chr9 | 57562205  | 58504206  | chr9 | 58100970  | 58110331  | Stoml1        |
| chr9 | 57562205  | 58504206  | chr9 | 58218310  | 58221990  | 1700072B07Rik |
| chr9 | 57562205  | 58504206  | chr9 | 57556375  | 57597969  | Edc3          |
| chr9 | 57562205  | 58504206  | chr9 | 57598517  | 57613667  | Clk3          |
| chr9 | 57562205  | 58504206  | chr9 | 57758792  | 57777775  | Ubl7          |
| chr9 | 57562205  | 58504206  | chr9 | 57862823  | 57874830  | Cyp11a1       |
| chr9 | 57562205  | 58504206  | chr9 | 57880080  | 57896804  | Gm16130       |
| chr9 | 57562205  | 58504206  | chr9 | 57976894  | 58001804  | Stra6         |
| chr9 | 57562205  | 58504206  | chr9 | 58044103  | 58052126  | Islr2         |
| chr9 | 57562205  | 58504206  | chr9 | 58064986  | 58097593  | Pml           |
| chr9 | 57562205  | 58504206  | chr9 | 58135529  | 58161019  | Loxl1         |
| chr9 | 57562205  | 58504206  | chr9 | 58207610  | 58218176  | Tbc1d21       |
| chr9 | 57562205  | 58504206  | chr9 | 58302979  | 58317430  | 4930461G14Rik |
| chr9 | 57562205  | 58504206  | chr9 | 58336409  | 58347549  | 6030419C18Rik |
| chr9 | 57562205  | 58504206  | chr9 | 58372106  | 58388747  | Cd276         |
| chr9 | 57562205  | 58504206  | chr9 | 57787941  | 57810672  | Sema7a        |
| chr9 | 57562205  | 58504206  | chr9 | 57876488  | 57966630  | Ccdc33        |

|      |           |           |      |           |           |               |
|------|-----------|-----------|------|-----------|-----------|---------------|
| chr9 | 57562205  | 58504206  | chr9 | 58430046  | 58500686  | Nptn          |
| chr9 | 57562205  | 58504206  | chr9 | 58500662  | 58589366  | 2410076I21Rik |
| chr9 | 57562205  | 58504206  | chr9 | 57638315  | 57682041  | Arid3b        |
| chr9 | 58799636  | 59266411  | chr9 | 59139378  | 59164007  | Adpgk         |
| chr9 | 58799636  | 59266411  | chr9 | 59169772  | 59201315  | Bbs4          |
| chr9 | 58799636  | 59266411  | chr9 | 58722486  | 58884248  | Neo1          |
| chr9 | 58799636  | 59266411  | chr9 | 59236360  | 59334181  | Arih1         |
| chr9 | 60403776  | 61194653  | chr9 | 60950818  | 60953193  | 4933433G08Rik |
| chr9 | 60403776  | 61194653  | chr9 | 60986321  | 60993066  | I730028E13Rik |
| chr9 | 60403776  | 61194653  | chr9 | 60435043  | 60535941  | Lrrc49        |
| chr9 | 60403776  | 61194653  | chr9 | 60560927  | 60586608  | Larp6         |
| chr9 | 60403776  | 61194653  | chr9 | 60864875  | 60867604  | Gm5122        |
| chr9 | 60403776  | 61194653  | chr9 | 61107033  | 61141616  | B930092H01Rik |
| chr9 | 60403776  | 61194653  | chr9 | 60642354  | 60728177  | Uaca          |
| chr9 | 61462646  | 62928902  | chr9 | 61761089  | 61762317  | Rplp1         |
| chr9 | 61462646  | 62928902  | chr9 | 61970324  | 61970401  | Mir5133       |
| chr9 | 61462646  | 62928902  | chr9 | 62090402  | 62091907  | A730043L09Rik |
| chr9 | 61462646  | 62928902  | chr9 | 62686593  | 62699809  | Cln6          |
| chr9 | 61462646  | 62928902  | chr9 | 61765084  | 61794606  | Kif23         |
| chr9 | 61462646  | 62928902  | chr9 | 61905055  | 61918413  | Glce          |
| chr9 | 61462646  | 62928902  | chr9 | 62189149  | 62226609  | Anp32a        |
| chr9 | 61462646  | 62928902  | chr9 | 62267298  | 62384851  | Coro2b        |
| chr9 | 61462646  | 62928902  | chr9 | 62525661  | 62631786  | Itga11        |
| chr9 | 61462646  | 62928902  | chr9 | 62689283  | 62709831  | Gm10653       |
| chr9 | 61462646  | 62928902  | chr9 | 62705910  | 62723724  | Calml4        |
| chr9 | 61462646  | 62928902  | chr9 | 62118535  | 62129986  | Spesp1        |
| chr9 | 61462646  | 62928902  | chr9 | 62639635  | 62659455  | Fem1b         |
| chr9 | 61462646  | 62928902  | chr9 | 62727883  | 62828686  | Pias1         |
| chr9 | 61462646  | 62928902  | chr9 | 61801544  | 61874597  | Paqr5         |
| chr9 | 63316800  | 64074528  | chr9 | 63886271  | 63889272  | 1700055C04Rik |
| chr9 | 63316800  | 64074528  | chr9 | 63897635  | 63901907  | 1110036E04Rik |
| chr9 | 63316800  | 64074528  | chr9 | 64021193  | 64026369  | Rpl4          |
| chr9 | 63316800  | 64074528  | chr9 | 64023238  | 64023329  | Snord16a      |
| chr9 | 63316800  | 64074528  | chr9 | 63450461  | 63489696  | Aagab         |
| chr9 | 63316800  | 64074528  | chr9 | 63928567  | 63935852  | Scarletlr     |
| chr9 | 63316800  | 64074528  | chr9 | 63964953  | 63985925  | Lctl          |
| chr9 | 63316800  | 64074528  | chr9 | 63984950  | 64020738  | Zwilch        |
| chr9 | 63316800  | 64074528  | chr9 | 64027103  | 64030495  | Snapc5        |
| chr9 | 63316800  | 64074528  | chr9 | 63269427  | 63450255  | Iqch          |
| chr9 | 63316800  | 64074528  | chr9 | 63494573  | 63605801  | Smad3         |
| chr9 | 63316800  | 64074528  | chr9 | 63800882  | 63869866  | Smad6         |
| chr9 | 63316800  | 64074528  | chr9 | 64033599  | 64101412  | Map2k1        |
| chr9 | 106676905 | 106844503 | chr9 | 106786315 | 106789331 | Rbm15b        |
| chr9 | 106676905 | 106844503 | chr9 | 106590410 | 106691544 | Rad54l2       |
| chr9 | 106676905 | 106844503 | chr9 | 106724306 | 106783323 | Vprbp         |
| chr9 | 106676905 | 106844503 | chr9 | 106789745 | 106794269 | Manf          |
| chr9 | 106676905 | 106844503 | chr9 | 106795155 | 107134240 | Dock3         |

|      |           |           |      |           |           |               |
|------|-----------|-----------|------|-----------|-----------|---------------|
| chr9 | 107564579 | 108353168 | chr9 | 107790459 | 107805470 | Mon1a         |
| chr9 | 107564579 | 108353168 | chr9 | 107809219 | 107822714 | Mst1r         |
| chr9 | 107564579 | 108353168 | chr9 | 107830799 | 107834792 | Actl11        |
| chr9 | 107564579 | 108353168 | chr9 | 107877897 | 107886387 | Uba7          |
| chr9 | 107564579 | 108353168 | chr9 | 107886554 | 107888247 | Fam212a       |
| chr9 | 107564579 | 108353168 | chr9 | 107955489 | 107958032 | Amigo3        |
| chr9 | 107564579 | 108353168 | chr9 | 107983828 | 107983914 | Mir7088       |
| chr9 | 107564579 | 108353168 | chr9 | 107987744 | 107996811 | Apeh          |
| chr9 | 107564579 | 108353168 | chr9 | 108192787 | 108198827 | Nicn1         |
| chr9 | 107564579 | 108353168 | chr9 | 108205288 | 108208282 | Tcta          |
| chr9 | 107564579 | 108353168 | chr9 | 108241410 | 108242673 | Gpx1          |
| chr9 | 107564579 | 108353168 | chr9 | 107553485 | 107571299 | Slc38a3       |
| chr9 | 107564579 | 108353168 | chr9 | 107576804 | 107581923 | Gnat1         |
| chr9 | 107564579 | 108353168 | chr9 | 107642825 | 107673333 | Rbm5          |
| chr9 | 107564579 | 108353168 | chr9 | 107838250 | 107852022 | Camkv         |
| chr9 | 107564579 | 108353168 | chr9 | 107904978 | 107951113 | Ip6k1         |
| chr9 | 107564579 | 108353168 | chr9 | 107951620 | 107954267 | Gmppb         |
| chr9 | 107564579 | 108353168 | chr9 | 107954002 | 107981706 | Rnf123        |
| chr9 | 107564579 | 108353168 | chr9 | 107982766 | 107987358 | Mst1          |
| chr9 | 107564579 | 108353168 | chr9 | 108199252 | 108203928 | Amt           |
| chr9 | 107564579 | 108353168 | chr9 | 108208535 | 108240270 | Rhoa          |
| chr9 | 107564579 | 108353168 | chr9 | 108295164 | 108300098 | 1700102P08Rik |
| chr9 | 107564579 | 108353168 | chr9 | 108305963 | 108330813 | Ccdc36        |
| chr9 | 107564579 | 108353168 | chr9 | 108338812 | 108348414 | BC048562      |
| chr9 | 107564579 | 108353168 | chr9 | 108349969 | 108363912 | Klhdc8b       |
| chr9 | 107564579 | 108353168 | chr9 | 107583832 | 107612806 | Sema3f        |
| chr9 | 107564579 | 108353168 | chr9 | 107675890 | 107775150 | Rbm6          |
| chr9 | 107564579 | 108353168 | chr9 | 107853293 | 107874599 | Traip         |
| chr9 | 107564579 | 108353168 | chr9 | 108107191 | 108166289 | Dag1          |
| chr9 | 107564579 | 108353168 | chr9 | 108250161 | 108294860 | Usp4          |
| chr9 | 107564579 | 108353168 | chr9 | 107998352 | 108092714 | Bsn           |
| chr9 | 108514749 | 108621576 | chr9 | 108564428 | 108586972 | Slc25a20      |
| chr9 | 108514749 | 108621576 | chr9 | 108594473 | 108651842 | Prkar2a       |
| chr9 | 108514749 | 108621576 | chr9 | 108505273 | 108551711 | Arih2         |
| chr9 | 121419535 | 121904166 | chr9 | 121619506 | 121622039 | Deb1          |
| chr9 | 121419535 | 121904166 | chr9 | 121669150 | 121680860 | Zfp651        |
| chr9 | 121419535 | 121904166 | chr9 | 121686724 | 121692937 | Klhl40        |
| chr9 | 121419535 | 121904166 | chr9 | 121823473 | 121825423 | Cyp8b1        |
| chr9 | 121419535 | 121904166 | chr9 | 121551833 | 121582072 | Vipr1         |
| chr9 | 121419535 | 121904166 | chr9 | 121589162 | 121614147 | Sec22c        |
| chr9 | 121419535 | 121904166 | chr9 | 121665757 | 121669061 | E530011L22Rik |
| chr9 | 121419535 | 121904166 | chr9 | 121693133 | 121701625 | Hhatl         |
| chr9 | 121419535 | 121904166 | chr9 | 121706744 | 121748579 | Ccdc13        |
| chr9 | 121419535 | 121904166 | chr9 | 121807472 | 121820189 | Ackr2         |
| chr9 | 121419535 | 121904166 | chr9 | 121846392 | 121856134 | 1700048O20Rik |
| chr9 | 121419535 | 121904166 | chr9 | 121860105 | 121889326 | Fam198a       |
| chr9 | 121419535 | 121904166 | chr9 | 121486960 | 121550684 | Lyzl4         |

|      |           |           |      |           |           |               |
|------|-----------|-----------|------|-----------|-----------|---------------|
| chr9 | 121419535 | 121904166 | chr9 | 121496137 | 121523373 | Lyzl4os       |
| chr9 | 121419535 | 121904166 | chr9 | 121757677 | 121767118 | Higd1a        |
| chr9 | 121419535 | 121904166 | chr9 | 121890723 | 121905144 | Pomgnt2       |
| chr9 | 121419535 | 121904166 | chr9 | 121628298 | 121665959 | Nktr          |
| chrX | 12157431  | 12717762  | chrX | 12229008  | 12229946  | Gm4984        |
| chrX | 12157431  | 12717762  | chrX | 12513998  | 12515667  | AA414768      |
| chrX | 12157431  | 12717762  | chrX | 12619140  | 12622421  | 5730405O15Rik |
| chrX | 12157431  | 12717762  | chrX | 12232009  | 12250672  | 1810030O07Rik |
| chrX | 12157431  | 12717762  | chrX | 12339403  | 12398618  | Gm14634       |
| chrX | 12157431  | 12717762  | chrX | 12164884  | 12194177  | Atp6ap2       |
| chrX | 12157431  | 12717762  | chrX | 12252496  | 12339099  | Med14         |
| chrX | 12157431  | 12717762  | chrX | 12648623  | 12750453  | Usp9x         |
| chrX | 45380045  | 45495807  | chrX | 45378322  | 45388029  | Apln          |
| chrX | 45380045  | 45495807  | chrX | 45461901  | 45490158  | Xpnpep2       |
| chrX | 50384408  | 50530377  | chrX | 50401173  | 50401255  | Mir450b       |
| chrX | 50384408  | 50530377  | chrX | 50401330  | 50401421  | Mir450-1      |
| chrX | 50384408  | 50530377  | chrX | 50401475  | 50401544  | Mir450-2      |
| chrX | 50384408  | 50530377  | chrX | 50402579  | 50402664  | Mir542        |
| chrX | 50384408  | 50530377  | chrX | 50406288  | 50410367  | C430049B03Rik |
| chrX | 50384408  | 50530377  | chrX | 50406431  | 50406530  | Mir351        |
| chrX | 50384408  | 50530377  | chrX | 50407160  | 50407231  | Mir503        |
| chrX | 50384408  | 50530377  | chrX | 50407431  | 50407526  | Mir322        |
| chrX | 50384408  | 50530377  | chrX | 50423178  | 50467582  | Plac1         |
| chrX | 69449941  | 69617751  | chrX | 69506369  | 69506451  | Mir224        |
| chrX | 69449941  | 69617751  | chrX | 69507562  | 69507647  | Mir452        |
| chrX | 69449941  | 69617751  | chrX | 69502770  | 69520060  | Gabre         |
| chrX | 69449941  | 69617751  | chrX | 69467355  | 69468303  | Magea4        |
| chrX | 71215513  | 71452092  | chrX | 71259252  | 71269260  | Irak1         |
| chrX | 71215513  | 71452092  | chrX | 71268866  | 71268937  | Mir5132       |
| chrX | 71215513  | 71452092  | chrX | 71269187  | 71269275  | Mir718        |
| chrX | 71215513  | 71452092  | chrX | 71372804  | 71396094  | Opn1mw        |
| chrX | 71215513  | 71452092  | chrX | 71396282  | 71413177  | Tex28         |
| chrX | 71215513  | 71452092  | chrX | 71422597  | 71453837  | Tktl1         |
| chrX | 71215513  | 71452092  | chrX | 71272160  | 71330975  | Mecp2         |
| chrX | 97651024  | 97844001  | chrX | 97767585  | 97773545  | Awat1         |
| chrX | 97651024  | 97844001  | chrX | 97785492  | 97790208  | P2ry4         |
| chrX | 97651024  | 97844001  | chrX | 97818244  | 97821246  | Pdzd11        |
| chrX | 97651024  | 97844001  | chrX | 97689629  | 97711464  | Igbp1         |
| chrX | 97651024  | 97844001  | chrX | 97720176  | 97741447  | Dgat2l6       |
| chrX | 97651024  | 97844001  | chrX | 97800835  | 97813832  | Arr3          |
| chrX | 97651024  | 97844001  | chrX | 97821403  | 97922610  | Kif4          |
| chrX | 130688603 | 130825329 | chrX | 130683583 | 130696467 | Xkrx          |
| chrX | 130688603 | 130825329 | chrX | 130722039 | 130742569 | Arl13a        |
| chrX | 130688603 | 130825329 | chrX | 130757493 | 130811523 | Trmt2b        |
| chrX | 131181890 | 131448597 | chrX | 131221057 | 131232311 | Armcx4        |
| chrX | 131181890 | 131448597 | chrX | 131252476 | 131256451 | Armcx1        |
| chrX | 131181890 | 131448597 | chrX | 131291106 | 131295995 | Armcx3        |

|      |           |           |      |           |           |               |
|------|-----------|-----------|------|-----------|-----------|---------------|
| chrX | 131181890 | 131448597 | chrX | 131292169 | 131292270 | Mir7093       |
| chrX | 131181890 | 131448597 | chrX | 131338680 | 131343760 | Armcx2        |
| chrX | 131181890 | 131448597 | chrX | 131219100 | 131221001 | B230119M05Rik |
| chrX | 131181890 | 131448597 | chrX | 131282993 | 131285958 | Armcx6        |
| chrX | 137772590 | 137959843 | chrX | 137599945 | 137908619 | Col4a6        |
| chrX | 137772590 | 137959843 | chrX | 137909961 | 138123778 | Col4a5        |
| chrX | 139678267 | 139827386 | chrX | 139720216 | 139828805 | Chrdl1        |
| chrX | 152016915 | 152159524 | chrX | 152004278 | 152057870 | Ptchd1        |
| chrX | 158414138 | 158640906 | chrX | 158274199 | 158597722 | Nhs           |
| chrX | 159786296 | 159998583 | chrX | 159951835 | 159987579 | Grpr          |
| chrX | 160178236 | 160421893 | chrX | 160198070 | 160199264 | Rnf138rt1     |
| chrX | 160178236 | 160421893 | chrX | 160347091 | 160367478 | Ap1s2         |
| chrX | 160178236 | 160421893 | chrX | 160373374 | 160396598 | Zrsr2         |
| chrX | 160178236 | 160421893 | chrX | 160414753 | 160465942 | Car5b         |

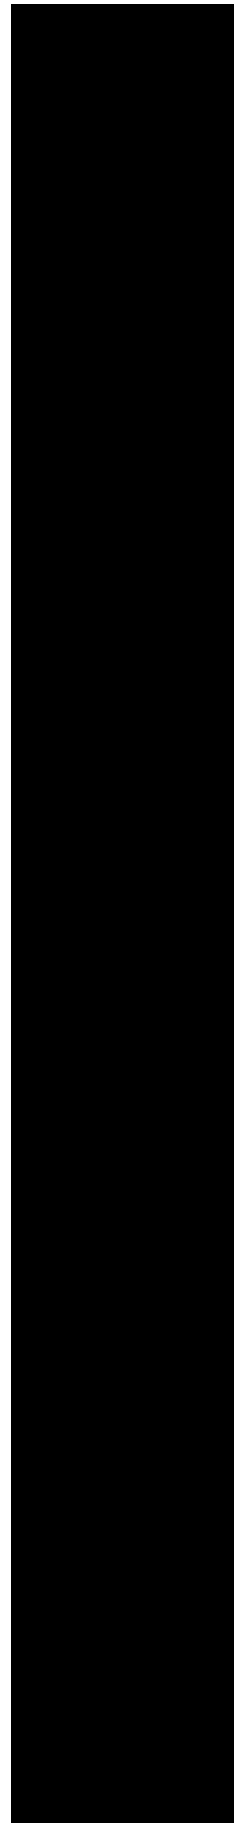

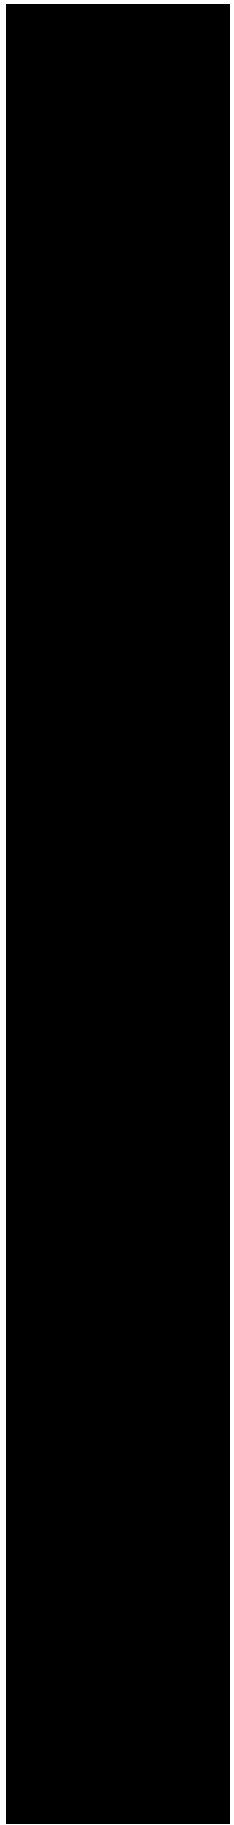





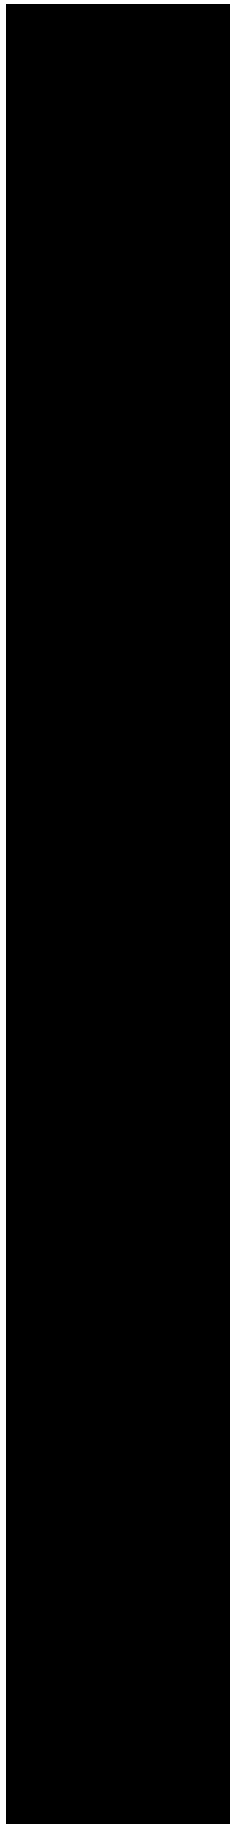





































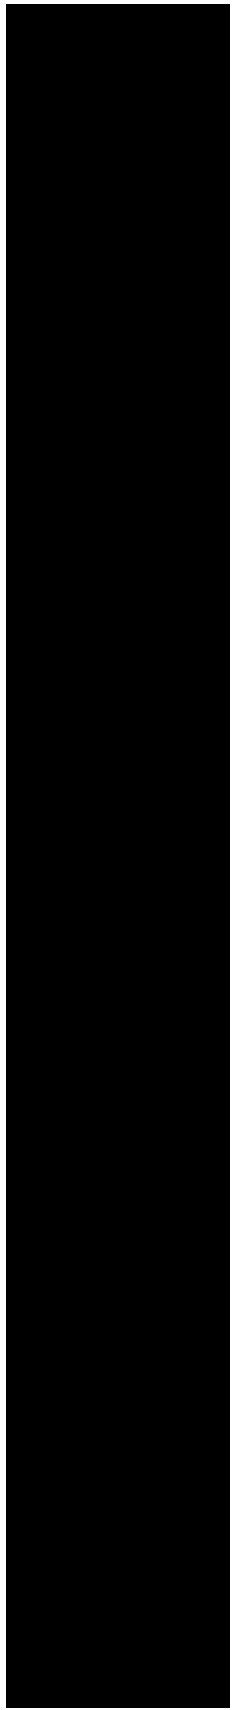

Cluster2 **Transient Day 1**

**Adipogenic genes**

|       |           |           |       |           |           |        |
|-------|-----------|-----------|-------|-----------|-----------|--------|
| chr15 | 76859883  | 77171344  | chr15 | 76845916  | 76881098  | Mb     |
| chr2  | 71403066  | 71650510  | chr2  | 71624995  | 71696484  | Itga6  |
| chr4  | 55535128  | 56400197  | chr4  | 55540008  | 55545347  | Klf4   |
| chr7  | 133730298 | 134040934 | chr7  | 133960398 | 133973733 | Fam57b |
| chr7  | 140193444 | 140299601 | chr7  | 140178693 | 140315166 | Ctbp2  |

**All genes**

|      |           |           |      |           |           |               |
|------|-----------|-----------|------|-----------|-----------|---------------|
| chr1 | 88221244  | 88684281  | chr1 | 88247744  | 88247860  | Snora75       |
| chr1 | 88221244  | 88684281  | chr1 | 88248555  | 88248702  | Mir3535       |
| chr1 | 88221244  | 88684281  | chr1 | 88252834  | 88252902  | Snord82       |
| chr1 | 88221244  | 88684281  | chr1 | 88282899  | 88284716  | Nmur1         |
| chr1 | 88221244  | 88684281  | chr1 | 88322903  | 88324624  | 1700019O17Rik |
| chr1 | 88221244  | 88684281  | chr1 | 88562867  | 88567148  | Nppc          |
| chr1 | 88221244  | 88684281  | chr1 | 88241293  | 88256030  | Ncl           |
| chr1 | 88221244  | 88684281  | chr1 | 88256148  | 88264539  | C130036L24Rik |
| chr1 | 88221244  | 88684281  | chr1 | 88423310  | 88427273  | Ptma          |
| chr1 | 88221244  | 88684281  | chr1 | 88483674  | 88503075  | Cops7b        |
| chr1 | 88221244  | 88684281  | chr1 | 88439589  | 88479076  | Pde6d         |
| chr1 | 88221244  | 88684281  | chr1 | 88600378  | 88946672  | Dis3l2        |
| chr1 | 135515524 | 135997931 | chr1 | 135552455 | 135557462 | Zbed6         |
| chr1 | 135515524 | 135997931 | chr1 | 135623134 | 135623222 | Mir6903       |
| chr1 | 135515524 | 135997931 | chr1 | 135793770 | 135804576 | Optc          |
| chr1 | 135515524 | 135997931 | chr1 | 135971441 | 135975732 | Btg2          |
| chr1 | 135515524 | 135997931 | chr1 | 135575605 | 135586685 | Lax1          |
| chr1 | 135515524 | 135997931 | chr1 | 135599250 | 135650324 | Atp2b4        |
| chr1 | 135515524 | 135997931 | chr1 | 135806881 | 135817978 | Prelp         |
| chr1 | 135515524 | 135997931 | chr1 | 135934091 | 135944854 | Fmod          |
| chr1 | 135515524 | 135997931 | chr1 | 135516447 | 135557976 | Zc3h11a       |
| chr1 | 137640818 | 137859115 | chr1 | 137662661 | 137665711 | Phlda3        |
| chr1 | 137640818 | 137859115 | chr1 | 137625773 | 137648806 | Csrp1         |

|       |           |           |       |           |           |               |
|-------|-----------|-----------|-------|-----------|-----------|---------------|
| chr1  | 137640818 | 137859115 | chr1  | 137695997 | 137707566 | Tnni1         |
| chr1  | 137640818 | 137859115 | chr1  | 137715174 | 137729918 | Lad1          |
| chr1  | 137640818 | 137859115 | chr1  | 137732910 | 137748845 | Tnnt2         |
| chr1  | 137640818 | 137859115 | chr1  | 137767971 | 137815601 | Pkp1          |
| chr1  | 137640818 | 137859115 | chr1  | 137850154 | 137902919 | Igfn1         |
| chr1  | 165996450 | 166837828 | chr1  | 166078706 | 166082348 | Gm16548       |
| chr1  | 165996450 | 166837828 | chr1  | 166793251 | 166801569 | Gm20743       |
| chr1  | 165996450 | 166837828 | chr1  | 165992206 | 166010916 | Sell          |
| chr1  | 165996450 | 166837828 | chr1  | 166081989 | 166150405 | F5            |
| chr1  | 165996450 | 166837828 | chr1  | 166179176 | 166195516 | Slc19a2       |
| chr1  | 165996450 | 166837828 | chr1  | 166205728 | 166217978 | Ccdc181       |
| chr1  | 165996450 | 166837828 | chr1  | 166219930 | 166237615 | Blzf1         |
| chr1  | 165996450 | 166837828 | chr1  | 166367229 | 166388486 | Atp1b1        |
| chr1  | 165996450 | 166837828 | chr1  | 166726862 | 166754397 | Dpt           |
| chr1  | 165996450 | 166837828 | chr1  | 166045394 | 166080157 | Selp          |
| chr1  | 165996450 | 166837828 | chr1  | 166237805 | 166367427 | Nme7          |
| chr1  | 167348050 | 167594041 | chr1  | 167391338 | 167411345 | Mpc2          |
| chr1  | 167348050 | 167594041 | chr1  | 167415313 | 167506904 | Adcy10        |
| chr1  | 167348050 | 167594041 | chr1  | 167522311 | 167564672 | Mpzl1         |
| chr1  | 167348050 | 167594041 | chr1  | 167579075 | 167638225 | Rcsd1         |
| chr1  | 167348050 | 167594041 | chr1  | 167259631 | 167390594 | Dcaf6         |
| chr1  | 171580604 | 172102004 | chr1  | 171671607 | 171677773 | Rgs4          |
| chr1  | 171580604 | 172102004 | chr1  | 171859069 | 171864784 | 1700084C01Rik |
| chr1  | 171580604 | 172102004 | chr1  | 171585631 | 171623657 | Rgs5          |
| chr1  | 171580604 | 172102004 | chr1  | 171879667 | 171899336 | Hsd17b7       |
| chr1  | 171580604 | 172102004 | chr1  | 171899539 | 171902527 | 3110045C21Rik |
| chr1  | 171580604 | 172102004 | chr1  | 172072133 | 172105077 | Uap1          |
| chr1  | 171580604 | 172102004 | chr1  | 171902437 | 172019075 | Ddr2          |
| chr10 | 41228222  | 41528411  | chr10 | 41239305  | 41250848  | Cd164         |
| chr10 | 41228222  | 41528411  | chr10 | 41287821  | 41296282  | 5730435O14Rik |
| chr10 | 41228222  | 41528411  | chr10 | 41210244  | 41234094  | Ppil6         |
| chr10 | 41228222  | 41528411  | chr10 | 41438645  | 41529674  | Cep57l1       |
| chr10 | 41228222  | 41528411  | chr10 | 41258654  | 41307559  | Ccdc162       |
| chr10 | 61131745  | 61239691  | chr10 | 61237484  | 61237569  | Mir5108       |
| chr10 | 61131745  | 61239691  | chr10 | 61111368  | 61136913  | Ppa1          |
| chr10 | 61131745  | 61239691  | chr10 | 61143068  | 61156045  | Sar1a         |
| chr10 | 61131745  | 61239691  | chr10 | 61158261  | 61165521  | Tysnd1        |
| chr10 | 61131745  | 61239691  | chr10 | 61178010  | 61202008  | Aifm2         |
| chr10 | 61131745  | 61239691  | chr10 | 61201394  | 61246612  | H2afy2        |
| chr10 | 80327531  | 80516911  | chr10 | 80392835  | 80394949  | Gadd45b       |
| chr10 | 80327531  | 80516911  | chr10 | 80482334  | 80488122  | Diras1        |
| chr10 | 80327531  | 80516911  | chr10 | 80318019  | 80331453  | Sppl2b        |
| chr10 | 80327531  | 80516911  | chr10 | 80362194  | 80363714  | Timm13        |
| chr10 | 80327531  | 80516911  | chr10 | 80364107  | 80380990  | Lmnb2         |
| chr10 | 80327531  | 80516911  | chr10 | 80411368  | 80477670  | Gng7          |
| chr10 | 80327531  | 80516911  | chr10 | 80491284  | 80496657  | Slc39a3       |
| chr10 | 80327531  | 80516911  | chr10 | 80506817  | 80522899  | Sgta          |

|       |           |           |       |           |           |          |
|-------|-----------|-----------|-------|-----------|-----------|----------|
| chr10 | 80327531  | 80516911  | chr10 | 80342560  | 80362239  | Tmprss9  |
| chr10 | 94523066  | 94789919  | chr10 | 94637379  | 94786731  | Cradd    |
| chr10 | 127440304 | 127778311 | chr10 | 127452270 | 127467086 | Prim1    |
| chr10 | 127440304 | 127778311 | chr10 | 127520362 | 127527444 | Atp5b    |
| chr10 | 127440304 | 127778311 | chr10 | 127522341 | 127522419 | Mir677   |
| chr10 | 127440304 | 127778311 | chr10 | 127631690 | 127647060 | Gls2     |
| chr10 | 127440304 | 127778311 | chr10 | 127691186 | 127692957 | Apon     |
| chr10 | 127440304 | 127778311 | chr10 | 127705052 | 127707207 | Apof     |
| chr10 | 127440304 | 127778311 | chr10 | 127733195 | 127735140 | Il23a    |
| chr10 | 127440304 | 127778311 | chr10 | 127427991 | 127444564 | Hsd17b6  |
| chr10 | 127440304 | 127778311 | chr10 | 127472401 | 127485693 | Naca     |
| chr10 | 127440304 | 127778311 | chr10 | 127496037 | 127514310 | Ptges3   |
| chr10 | 127440304 | 127778311 | chr10 | 127566525 | 127617353 | Rbms2    |
| chr10 | 127440304 | 127778311 | chr10 | 127646965 | 127648850 | Spryd4   |
| chr10 | 127440304 | 127778311 | chr10 | 127669118 | 127689997 | Timeless |
| chr10 | 127440304 | 127778311 | chr10 | 127707631 | 127729905 | Stat2    |
| chr10 | 127440304 | 127778311 | chr10 | 127740390 | 127758414 | Pan2     |
| chr10 | 127440304 | 127778311 | chr10 | 127759514 | 127764243 | Cnpy2    |
| chr10 | 127440304 | 127778311 | chr10 | 127529838 | 127566359 | Baz2a    |
| chr10 | 127440304 | 127778311 | chr10 | 127662893 | 127668867 | Mip      |
| chr10 | 127440304 | 127778311 | chr10 | 127774887 | 127799535 | Cs       |
| chr11 | 59334469  | 59526979  | chr11 | 59384283  | 59385240  | Olfr222  |
| chr11 | 59334469  | 59526979  | chr11 | 59402629  | 59403589  | Olfr223  |
| chr11 | 59334469  | 59526979  | chr11 | 59426467  | 59427727  | Olfr225  |
| chr11 | 59334469  | 59526979  | chr11 | 59356187  | 59380458  | Nlrp3    |
| chr11 | 59334469  | 59526979  | chr11 | 59475996  | 59594362  | Mrip     |
| chr11 | 59655630  | 59836877  | chr11 | 59760393  | 59761649  | Med9os   |
| chr11 | 59655630  | 59836877  | chr11 | 59776684  | 59778444  | Rasd1    |
| chr11 | 59655630  | 59836877  | chr11 | 59661574  | 59690035  | Nt5m     |
| chr11 | 59655630  | 59836877  | chr11 | 59784118  | 59850341  | Pemt     |
| chr11 | 59655630  | 59836877  | chr11 | 59761715  | 59776808  | Med9     |
| chr11 | 76953553  | 77449576  | chr11 | 77277414  | 77283003  | Coro6    |
| chr11 | 76953553  | 77449576  | chr11 | 77321600  | 77326775  | Trp53i13 |
| chr11 | 76953553  | 77449576  | chr11 | 77283988  | 77303180  | Ankrd13b |
| chr11 | 76953553  | 77449576  | chr11 | 77306913  | 77321276  | Git1     |
| chr11 | 76953553  | 77449576  | chr11 | 77342663  | 77421317  | Taok1    |
| chr11 | 76953553  | 77449576  | chr11 | 76903416  | 77002470  | Efcab5   |
| chr11 | 76953553  | 77449576  | chr11 | 77029926  | 77273721  | Ssh2     |
| chr11 | 76953553  | 77449576  | chr11 | 77328618  | 77334130  | Abhd15   |
| chr11 | 78829413  | 79274634  | chr11 | 79052883  | 79068197  | Wsb1     |
| chr11 | 78829413  | 79274634  | chr11 | 78837098  | 78848507  | Gm11201  |
| chr11 | 78829413  | 79274634  | chr11 | 78828302  | 78959856  | Ksr1     |
| chr11 | 78829413  | 79274634  | chr11 | 79153393  | 79395111  | Nf1      |
| chr11 | 94362715  | 94495679  | chr11 | 94426387  | 94430441  | Chad     |
| chr11 | 94362715  | 94495679  | chr11 | 94401111  | 94410521  | Rsad1    |
| chr11 | 94362715  | 94495679  | chr11 | 94418415  | 94463100  | Acsf2    |
| chr11 | 94362715  | 94495679  | chr11 | 94491137  | 94506530  | Lrrc59   |

|       |           |           |       |           |           |               |
|-------|-----------|-----------|-------|-----------|-----------|---------------|
| chr11 | 94362715  | 94495679  | chr11 | 94362660  | 94382816  | Mycbpap       |
| chr11 | 95459072  | 95667094  | chr11 | 95584899  | 95588087  | B130006D01Rik |
| chr11 | 95459072  | 95667094  | chr11 | 95528270  | 95542087  | Phb           |
| chr11 | 95459072  | 95667094  | chr11 | 95561419  | 95574068  | Zfp652os      |
| chr11 | 95459072  | 95667094  | chr11 | 95610380  | 95626027  | Zfp652        |
| chr11 | 105015543 | 105448605 | chr11 | 105040334 | 105042747 | 1700052K11Rik |
| chr11 | 105015543 | 105448605 | chr11 | 105153959 | 105212459 | Mrc2          |
| chr11 | 105015543 | 105448605 | chr11 | 105042843 | 105145270 | Tlk2          |
| chr11 | 105015543 | 105448605 | chr11 | 105222111 | 105318049 | Mar-10        |
| chr11 | 105753200 | 106092446 | chr11 | 105795017 | 105805461 | Cyb561        |
| chr11 | 105753200 | 106092446 | chr11 | 105927420 | 105934926 | Taco1         |
| chr11 | 105753200 | 106092446 | chr11 | 105826920 | 105847008 | Gm11651       |
| chr11 | 105753200 | 106092446 | chr11 | 105829258 | 105851278 | Ace           |
| chr11 | 105753200 | 106092446 | chr11 | 105855988 | 105866757 | Ace3          |
| chr11 | 105753200 | 106092446 | chr11 | 105869516 | 105895378 | Kcnh6         |
| chr11 | 105753200 | 106092446 | chr11 | 105946215 | 106016748 | Map3k3        |
| chr11 | 105753200 | 106092446 | chr11 | 106017569 | 106021456 | Limd2         |
| chr11 | 105753200 | 106092446 | chr11 | 106060669 | 106077681 | Ccdc47        |
| chr11 | 105753200 | 106092446 | chr11 | 106078239 | 106110454 | Ddx42         |
| chr11 | 105753200 | 106092446 | chr11 | 105451299 | 105790617 | Tanc2         |
| chr11 | 105753200 | 106092446 | chr11 | 106024287 | 106054917 | Strada        |
| chr11 | 105753200 | 106092446 | chr11 | 105898185 | 105920637 | Dcaf7         |
| chr11 | 106290081 | 106864880 | chr11 | 106362304 | 106362377 | Snord104      |
| chr11 | 106290081 | 106864880 | chr11 | 106629517 | 106640851 | Polg2         |
| chr11 | 106290081 | 106864880 | chr11 | 106644006 | 106644073 | Mir3064       |
| chr11 | 106290081 | 106864880 | chr11 | 106612539 | 106630108 | Milr1         |
| chr11 | 106290081 | 106864880 | chr11 | 106641669 | 106649808 | Ddx5          |
| chr11 | 106290081 | 106864880 | chr11 | 106650565 | 106680175 | Cep95         |
| chr11 | 106290081 | 106864880 | chr11 | 106849942 | 106860839 | Kpna2         |
| chr11 | 106290081 | 106864880 | chr11 | 106258933 | 106349110 | Ern1          |
| chr11 | 106290081 | 106864880 | chr11 | 106363452 | 106474244 | Tex2          |
| chr11 | 106290081 | 106864880 | chr11 | 106515531 | 106576595 | Pecam1        |
| chr11 | 106290081 | 106864880 | chr11 | 106681377 | 106782029 | Smurf2        |
| chr11 | 107235575 | 107356226 | chr11 | 107069205 | 107332034 | Pitpnc1       |
| chr11 | 107235575 | 107356226 | chr11 | 107340841 | 107359350 | Psmd12        |
| chr11 | 116489752 | 116686637 | chr11 | 116506908 | 116515627 | Cygb          |
| chr11 | 116489752 | 116686637 | chr11 | 116532973 | 116537112 | 1810032O08Rik |
| chr11 | 116489752 | 116686637 | chr11 | 116533818 | 116533896 | Snord1c       |
| chr11 | 116489752 | 116686637 | chr11 | 116535460 | 116535537 | Snord1b       |
| chr11 | 116489752 | 116686637 | chr11 | 116535910 | 116535986 | Snord1a       |
| chr11 | 116489752 | 116686637 | chr11 | 116613480 | 116619197 | BC018473      |
| chr11 | 116489752 | 116686637 | chr11 | 116626338 | 116636821 | St6galnac1    |
| chr11 | 116489752 | 116686637 | chr11 | 116538018 | 116555974 | St6galnac2    |
| chr11 | 116489752 | 116686637 | chr11 | 116664713 | 116689360 | Mxra7         |
| chr11 | 116489752 | 116686637 | chr11 | 116518421 | 116529703 | Gm11744       |
| chr11 | 117410679 | 117578392 | chr11 | 117472560 | 117474731 | 2900041M22Rik |
| chr11 | 117410679 | 117578392 | chr11 | 117515602 | 117624753 | Tnrc6c        |

|       |           |           |       |           |           |               |
|-------|-----------|-----------|-------|-----------|-----------|---------------|
| chr11 | 118069219 | 118347550 | chr11 | 118120966 | 118151558 | Usp36         |
| chr11 | 118069219 | 118347550 | chr11 | 118162374 | 118216725 | Timp2         |
| chr11 | 118069219 | 118347550 | chr11 | 118193673 | 118203848 | BC100451      |
| chr11 | 118069219 | 118347550 | chr11 | 118254065 | 118263245 | Lgals3bp      |
| chr11 | 118069219 | 118347550 | chr11 | 118267602 | 118280432 | Cant1         |
| chr11 | 118069219 | 118347550 | chr11 | 118289770 | 118313096 | C1qtnf1       |
| chr11 | 118069219 | 118347550 | chr11 | 118305513 | 118316309 | Gm11747       |
| chr11 | 118069219 | 118347550 | chr11 | 118338273 | 118350512 | Engase        |
| chr11 | 118069219 | 118347550 | chr11 | 118025479 | 118109906 | Cyth1         |
| chr11 | 118883402 | 119113314 | chr11 | 118884342 | 118892584 | Cbx2          |
| chr11 | 118883402 | 119113314 | chr11 | 118899749 | 118902227 | Cbx8          |
| chr11 | 118883402 | 119113314 | chr11 | 118938884 | 118947551 | Cbx4          |
| chr11 | 118883402 | 119113314 | chr11 | 119015389 | 119015451 | Mir6934       |
| chr11 | 118883402 | 119113314 | chr11 | 119089885 | 119126526 | Ccdc40        |
| chr11 | 118883402 | 119113314 | chr11 | 119004356 | 119089813 | Tbc1d16       |
| chr12 | 8396346   | 8581014   | chr12 | 8504564   | 8506791   | Rhob          |
| chr12 | 8396346   | 8581014   | chr12 | 8535288   | 8605872   | Slc7a15       |
| chr12 | 56484653  | 56596624  | chr12 | 56590395  | 56593634  | Nfkbia        |
| chr12 | 56484653  | 56596624  | chr12 | 56499811  | 56519446  | Psma6         |
| chr12 | 80161697  | 81591722  | chr12 | 81208746  | 81214000  | Zfp36l1       |
| chr12 | 80161697  | 81591722  | chr12 | 81492599  | 81492664  | Mir1843       |
| chr12 | 80161697  | 81591722  | chr12 | 81492600  | 81492724  | Scarna3b      |
| chr12 | 80161697  | 81591722  | chr12 | 80130149  | 80182642  | Plekhh1       |
| chr12 | 80161697  | 81591722  | chr12 | 80181657  | 80190657  | Pigh          |
| chr12 | 80161697  | 81591722  | chr12 | 80231774  | 80257288  | Arg2          |
| chr12 | 80161697  | 81591722  | chr12 | 80257003  | 80273445  | Vti1b         |
| chr12 | 80161697  | 81591722  | chr12 | 80276537  | 80292806  | Rdh11         |
| chr12 | 80161697  | 81591722  | chr12 | 80309900  | 80323648  | Rdh12         |
| chr12 | 80161697  | 81591722  | chr12 | 81221532  | 81233831  | 2310015A10Rik |
| chr12 | 80161697  | 81591722  | chr12 | 81268528  | 81361358  | Actn1         |
| chr12 | 80161697  | 81591722  | chr12 | 81564081  | 81599122  | Exd2          |
| chr12 | 80161697  | 81591722  | chr12 | 80333333  | 80397269  | Zfyve26       |
| chr12 | 80161697  | 81591722  | chr12 | 81436833  | 81537588  | Dcaf5         |
| chr12 | 80161697  | 81591722  | chr12 | 80398268  | 80915677  | Rad51b        |
| chr12 | 81867232  | 81995434  | chr12 | 81891518  | 81981820  | 4933426M11Rik |
| chr12 | 82118923  | 82313832  | chr12 | 82267137  | 82267221  | Mir3067       |
| chr12 | 82118923  | 82313832  | chr12 | 82127794  | 82287401  | Smoc1         |
| chr12 | 82118923  | 82313832  | chr12 | 82298901  | 82434167  | Slc8a3        |
| chr12 | 109903144 | 110355344 | chr12 | 110075182 | 110075278 | Mir345        |
| chr12 | 109903144 | 110355344 | chr12 | 110089338 | 110095025 | Slc25a47      |
| chr12 | 109903144 | 110355344 | chr12 | 109925001 | 109940516 | Degs2         |
| chr12 | 109903144 | 110355344 | chr12 | 110031520 | 110054842 | Yy1           |
| chr12 | 109903144 | 110355344 | chr12 | 110064087 | 110074086 | Slc25a29      |
| chr12 | 109903144 | 110355344 | chr12 | 110270391 | 110306427 | Begain        |
| chr12 | 109903144 | 110355344 | chr12 | 109792929 | 109926725 | Evl           |
| chr12 | 109903144 | 110355344 | chr12 | 110132481 | 110266662 | Wdr25         |
| chr12 | 109903144 | 110355344 | chr12 | 110098239 | 110132384 | Wars          |

|       |           |           |       |           |           |               |
|-------|-----------|-----------|-------|-----------|-----------|---------------|
| chr13 | 30802150  | 30947430  | chr13 | 30841126  | 30858796  | Irf4          |
| chr13 | 30802150  | 30947430  | chr13 | 30751927  | 30803101  | Dusp22        |
| chr13 | 30802150  | 30947430  | chr13 | 30905786  | 31065916  | Exoc2         |
| chr13 | 31294361  | 31621619  | chr13 | 31305278  | 31332955  | 4930401O12Rik |
| chr13 | 37506683  | 38054943  | chr13 | 37437213  | 37510905  | Ly86          |
| chr13 | 37506683  | 38054943  | chr13 | 37917906  | 38043874  | Rreb1         |
| chr13 | 52775204  | 53141906  | chr13 | 52824738  | 52852574  | BB123696      |
| chr13 | 52775204  | 53141906  | chr13 | 53062577  | 53076408  | Nfil3         |
| chr13 | 52775204  | 53141906  | chr13 | 52930478  | 53025046  | Auh           |
| chr13 | 112978218 | 113459424 | chr13 | 113254277 | 113297068 | Il6st         |
| chr13 | 112978218 | 113459424 | chr13 | 113313015 | 113370870 | Il31ra        |
| chr13 | 112978218 | 113459424 | chr13 | 113388540 | 113442518 | Ddx4          |
| chr13 | 112978218 | 113459424 | chr13 | 113078658 | 113174210 | Ankrd55       |
| chr13 | 112978218 | 113459424 | chr13 | 113450973 | 113528960 | Slc38a9       |
| chr14 | 22216602  | 22491838  | chr14 | 22318991  | 22491700  | Kat6b         |
| chr14 | 22216602  | 22491838  | chr14 | 21871795  | 22267791  | Adk           |
| chr14 | 58132824  | 58254750  | chr14 | 58143665  | 58162003  | Il17d         |
| chr14 | 58132824  | 58254750  | chr14 | 58168434  | 58190406  | N6amt2        |
| chr14 | 58132824  | 58254750  | chr14 | 58201107  | 58283793  | Xpo4          |
| chr14 | 58132824  | 58254750  | chr14 | 58042907  | 58136773  | Ift88         |
| chr14 | 63055305  | 63419589  | chr14 | 63011506  | 63075126  | Gucy1b2       |
| chr14 | 63055305  | 63419589  | chr14 | 63174573  | 63227322  | Fam124a       |
| chr14 | 63055305  | 63419589  | chr14 | 63282503  | 63311080  | Serpine3      |
| chr14 | 63055305  | 63419589  | chr14 | 63295164  | 63379949  | Ints6         |
| chr14 | 63055305  | 63419589  | chr14 | 63379337  | 63448963  | 4931440J10Rik |
| chr14 | 63578258  | 63830506  | chr14 | 63652923  | 63656683  | Defb30        |
| chr14 | 63578258  | 63830506  | chr14 | 63665827  | 63667443  | Defb42        |
| chr14 | 63578258  | 63830506  | chr14 | 63673909  | 63676986  | 2700070H01Rik |
| chr14 | 63578258  | 63830506  | chr14 | 63801281  | 63812362  | Neil2         |
| chr14 | 63578258  | 63830506  | chr14 | 63596360  | 63603347  | Defb48        |
| chr14 | 63578258  | 63830506  | chr14 | 63616913  | 63619997  | Defb47        |
| chr14 | 63578258  | 63830506  | chr14 | 63630607  | 63636925  | Defb43        |
| chr14 | 63578258  | 63830506  | chr14 | 63741298  | 63764760  | Ctsb          |
| chr14 | 63578258  | 63830506  | chr14 | 63763987  | 63796630  | Fdft1         |
| chr14 | 63578258  | 63830506  | chr14 | 63817751  | 63864097  | Gata4         |
| chr14 | 65878665  | 66105510  | chr14 | 65811277  | 65881300  | Fzd3          |
| chr14 | 65878665  | 66105510  | chr14 | 65977512  | 66017767  | Zfp395        |
| chr14 | 65878665  | 66105510  | chr14 | 66019509  | 66044309  | Pnoc          |
| chr14 | 65878665  | 66105510  | chr14 | 65885537  | 65940339  | Fbxo16        |
| chr14 | 67653015  | 68109335  | chr14 | 67923724  | 67933548  | Gm6878        |
| chr14 | 67653015  | 68109335  | chr14 | 67950878  | 68016579  | 4930438E09Rik |
| chr14 | 67653015  | 68109335  | chr14 | 67632892  | 67691308  | Ppp2r2a       |
| chr14 | 67653015  | 68109335  | chr14 | 67852128  | 68049789  | Ebf2          |
| chr14 | 68250429  | 68625707  | chr14 | 68363285  | 68367493  | Gnrh1         |
| chr14 | 68250429  | 68625707  | chr14 | 68477692  | 68477802  | Mir6539       |
| chr14 | 68250429  | 68625707  | chr14 | 68294410  | 68333898  | Cdca2         |
| chr14 | 68250429  | 68625707  | chr14 | 68334154  | 68360367  | Kctd9         |



|       |          |          |       |          |          |               |
|-------|----------|----------|-------|----------|----------|---------------|
| chr14 | 68250429 | 68625707 | chr14 | 68369984 | 68551629 | Dock5         |
| chr14 | 70223882 | 70913004 | chr14 | 70477251 | 70479964 | Egr3          |
| chr14 | 70223882 | 70913004 | chr14 | 70554211 | 70559309 | 9930012K11Rik |
| chr14 | 70223882 | 70913004 | chr14 | 70838554 | 70843278 | Polr3d        |
| chr14 | 70223882 | 70913004 | chr14 | 70843316 | 70843398 | Mir320        |
| chr14 | 70223882 | 70913004 | chr14 | 70537975 | 70553598 | Ccar2         |
| chr14 | 70223882 | 70913004 | chr14 | 70564024 | 70577479 | Pdlim2        |
| chr14 | 70223882 | 70913004 | chr14 | 70580274 | 70607478 | Sorbs3        |
| chr14 | 70223882 | 70913004 | chr14 | 70703273 | 70751231 | Slc39a14      |
| chr14 | 70223882 | 70913004 | chr14 | 70857323 | 70868631 | Phyhip        |
| chr14 | 70223882 | 70913004 | chr14 | 70499951 | 70538013 | Bin3          |
| chr14 | 70223882 | 70913004 | chr14 | 70617704 | 70689256 | Ppp3cc        |
| chr14 | 70223882 | 70913004 | chr14 | 70772286 | 70828901 | Piwil2        |
| chr14 | 70223882 | 70913004 | chr14 | 70874361 | 70920067 | Bmp1          |
| chr14 | 70223882 | 70913004 | chr14 | 70240213 | 70459725 | Pebp4         |
| chr14 | 73655204 | 73868653 | chr14 | 73762038 | 73785078 | Itm2b         |
| chr14 | 73655204 | 73868653 | chr14 | 73595308 | 73725598 | Rb1           |
| chr14 | 76213934 | 76572947 | chr14 | 76242724 | 76244771 | Gm4285        |
| chr14 | 76213934 | 76572947 | chr14 | 76245062 | 76248110 | Tpt1          |
| chr14 | 76213934 | 76572947 | chr14 | 76247729 | 76247841 | Snora31       |
| chr14 | 76213934 | 76572947 | chr14 | 76354809 | 76365024 | Kctd4         |
| chr14 | 76213934 | 76572947 | chr14 | 76296743 | 76410672 | Gtf2f2        |
| chr14 | 76213934 | 76572947 | chr14 | 76486038 | 76510622 | Gpalpp1       |
| chr14 | 76213934 | 76572947 | chr14 | 76510697 | 76537186 | Nufip1        |
| chr14 | 76880551 | 77447303 | chr14 | 76914364 | 76920662 | 4930444M15Rik |
| chr14 | 76880551 | 77447303 | chr14 | 76815627 | 76907573 | Tsc22d1       |
| chr14 | 76880551 | 77447303 | chr14 | 77077374 | 77086915 | 1700108F19Rik |
| chr14 | 76880551 | 77447303 | chr14 | 77424007 | 77436424 | Lacc1         |
| chr14 | 76880551 | 77447303 | chr14 | 76932618 | 76956696 | Serp2         |
| chr14 | 76880551 | 77447303 | chr14 | 77436578 | 77512011 | Ccdc122       |
| chr15 | 57697726 | 57915202 | chr15 | 57853826 | 57865849 | 9130401M01Rik |
| chr15 | 57697726 | 57915202 | chr15 | 57701056 | 57723973 | Derl1         |
| chr15 | 57697726 | 57915202 | chr15 | 57743753 | 57801623 | Tbc1d31       |
| chr15 | 57697726 | 57915202 | chr15 | 57817457 | 57842257 | Fam83a        |
| chr15 | 57697726 | 57915202 | chr15 | 57878557 | 57908063 | Zhx1          |
| chr15 | 58570281 | 58680768 | chr15 | 58613823 | 58654982 | Tmem65        |
| chr15 | 76859883 | 77171344 | chr15 | 76875504 | 76887538 | Apol6         |
| chr15 | 76859883 | 77171344 | chr15 | 76845916 | 76881098 | Mb            |
| chr15 | 76859883 | 77171344 | chr15 | 76914827 | 76926744 | 1700109K24Rik |
| chr15 | 76859883 | 77171344 | chr15 | 76909419 | 77137483 | Rbfox2        |
| chr15 | 80504184 | 80703465 | chr15 | 80502276 | 80530855 | Fam83f        |
| chr15 | 80504184 | 80703465 | chr15 | 80521454 | 80528040 | A430088P11Rik |
| chr15 | 80504184 | 80703465 | chr15 | 80541742 | 80771516 | Tnrc6b        |
| chr15 | 82644040 | 82748363 | chr15 | 82729509 | 82736246 | Gm20324       |
| chr15 | 82644040 | 82748363 | chr15 | 82720912 | 82728891 | Tbrg3         |
| chr15 | 82644040 | 82748363 | chr15 | 82639054 | 82742564 | Tcf20         |
| chr15 | 82957465 | 83525794 | chr15 | 82980074 | 82980224 | Rnu12         |

|       |          |          |       |          |          |               |
|-------|----------|----------|-------|----------|----------|---------------|
| chr15 | 82957465 | 83525794 | chr15 | 83184276 | 83197727 | 1700001L05Rik |
| chr15 | 82957465 | 83525794 | chr15 | 82983931 | 83002638 | Cyb5r3        |
| chr15 | 82957465 | 83525794 | chr15 | 83057151 | 83082204 | A4galt        |
| chr15 | 82957465 | 83525794 | chr15 | 83130169 | 83180677 | Arfgap3       |
| chr15 | 82957465 | 83525794 | chr15 | 83314198 | 83341337 | Ttll1         |
| chr15 | 82957465 | 83525794 | chr15 | 83377226 | 83386141 | Mcat          |
| chr15 | 82957465 | 83525794 | chr15 | 83394002 | 83404633 | Tspo          |
| chr15 | 82957465 | 83525794 | chr15 | 83405523 | 83425587 | Ttll12        |
| chr15 | 82957465 | 83525794 | chr15 | 82956407 | 82979766 | Poldip3       |
| chr15 | 82957465 | 83525794 | chr15 | 83206036 | 83295036 | Pacsin2       |
| chr15 | 82957465 | 83525794 | chr15 | 83357291 | 83375065 | Bik           |
| chr15 | 82957465 | 83525794 | chr15 | 83433012 | 83555469 | Scube1        |
| chr16 | 22074102 | 22199145 | chr16 | 22059081 | 22163372 | Igf2bp2       |
| chr16 | 24268419 | 24414123 | chr16 | 24392641 | 24393741 | 1110054M08Rik |
| chr16 | 24268419 | 24414123 | chr16 | 24393435 | 24992664 | Lpp           |
| chr16 | 24646917 | 24876158 | chr16 | 24393435 | 24992664 | Lpp           |
| chr16 | 24646917 | 24876158 | chr16 | 24721940 | 24992664 | Lpp           |
| chr16 | 25366092 | 25992863 | chr16 | 25286902 | 25422430 | Tprg          |
| chr16 | 25366092 | 25992863 | chr16 | 25683850 | 25892174 | Trp63         |
| chr16 | 25366092 | 25992863 | chr16 | 25960408 | 26105870 | Leprel1       |
| chr16 | 31066227 | 31801649 | chr16 | 31251626 | 31275363 | Ppp1r2        |
| chr16 | 31066227 | 31801649 | chr16 | 31296277 | 31314682 | Apod          |
| chr16 | 31066227 | 31801649 | chr16 | 30920639 | 31275783 | Mir1195       |
| chr16 | 31066227 | 31801649 | chr16 | 30955588 | 31081518 | Xxylt1        |
| chr16 | 31066227 | 31801649 | chr16 | 31092498 | 31201324 | Acap2         |
| chr16 | 31066227 | 31801649 | chr16 | 31663528 | 31873442 | Dlg1          |
| chr16 | 31066227 | 31801649 | chr16 | 31422382 | 31458987 | Bdh1          |
| chr16 | 34629575 | 34814670 | chr16 | 34651296 | 34678696 | Ropn1         |
| chr16 | 34629575 | 34814670 | chr16 | 34690701 | 34725280 | Ccdc14        |
| chr16 | 34629575 | 34814670 | chr16 | 34785035 | 35002520 | Mylk          |
| chr16 | 34949375 | 35133945 | chr16 | 34943260 | 34959080 | E130310I04Rik |
| chr16 | 34949375 | 35133945 | chr16 | 35022506 | 35109261 | Ptplb         |
| chr16 | 34949375 | 35133945 | chr16 | 34785035 | 35002520 | Mylk          |
| chr16 | 85879950 | 86051282 | chr16 | 85858401 | 85901370 | Adamts5       |
| chr16 | 91594081 | 91895189 | chr16 | 91614501 | 91619244 | Dnajc28       |
| chr16 | 91594081 | 91895189 | chr16 | 91574752 | 91597925 | Tmem50b       |
| chr16 | 91594081 | 91895189 | chr16 | 91621641 | 91647217 | Gart          |
| chr16 | 91594081 | 91895189 | chr16 | 91648068 | 91679437 | Son           |
| chr16 | 91594081 | 91895189 | chr16 | 91679509 | 91688973 | Donson        |
| chr16 | 91594081 | 91895189 | chr16 | 91689142 | 91716000 | Gm10785       |
| chr16 | 91594081 | 91895189 | chr16 | 91689566 | 91729047 | Cryzl1        |
| chr16 | 91594081 | 91895189 | chr16 | 91729615 | 91920824 | Itsn1         |
| chr17 | 29471264 | 29873311 | chr17 | 29627989 | 29632404 | Pim1          |
| chr17 | 29471264 | 29873311 | chr17 | 29732482 | 29732545 | Mir7667       |
| chr17 | 29471264 | 29873311 | chr17 | 29469020 | 29484849 | Mtch1         |
| chr17 | 29471264 | 29873311 | chr17 | 29497858 | 29516480 | Fgd2          |
| chr17 | 29471264 | 29873311 | chr17 | 29662962 | 29686538 | Tmem217       |

|       |          |          |       |          |          |               |
|-------|----------|----------|-------|----------|----------|---------------|
| chr17 | 29471264 | 29873311 | chr17 | 29686746 | 29743753 | Tbc1d22b      |
| chr17 | 29471264 | 29873311 | chr17 | 29715760 | 29733250 | Tbc1d22bos    |
| chr17 | 29471264 | 29873311 | chr17 | 29797545 | 29840304 | Cmtr1         |
| chr17 | 29471264 | 29873311 | chr17 | 29832921 | 29853962 | Ccdc167       |
| chr17 | 29471264 | 29873311 | chr17 | 29751775 | 29778604 | Rnf8          |
| chr17 | 29998640 | 30737108 | chr17 | 30393401 | 30393480 | Mir6412       |
| chr17 | 29998640 | 30737108 | chr17 | 30531769 | 30533125 | Gm6402        |
| chr17 | 29998640 | 30737108 | chr17 | 30729806 | 30749604 | Glo1          |
| chr17 | 29998640 | 30737108 | chr17 | 29964902 | 30024827 | Mdga1         |
| chr17 | 29998640 | 30737108 | chr17 | 30142031 | 30346965 | Zfand3        |
| chr17 | 29998640 | 30737108 | chr17 | 30352468 | 30713232 | Btbd9         |
| chr17 | 44735162 | 44843963 | chr17 | 44632935 | 44951746 | Runx2         |
| chr17 | 45804845 | 45939458 | chr17 | 45869812 | 45870793 | 1600014C23Rik |
| chr17 | 45804845 | 45939458 | chr17 | 45797125 | 45823167 | Tmem63b       |
| chr17 | 45804845 | 45939458 | chr17 | 45823320 | 45835444 | Mrpl14        |
| chr17 | 46589642 | 46746929 | chr17 | 46633737 | 46636567 | Dnph1         |
| chr17 | 46589642 | 46746929 | chr17 | 46683787 | 46693111 | Srf           |
| chr17 | 46589642 | 46746929 | chr17 | 46690775 | 46690838 | Mir6976       |
| chr17 | 46589642 | 46746929 | chr17 | 46579396 | 46624624 | Ttbk1         |
| chr17 | 46589642 | 46746929 | chr17 | 46701399 | 46766453 | Ptk7          |
| chr17 | 46589642 | 46746929 | chr17 | 46637557 | 46683337 | Cul9          |
| chr17 | 81056416 | 81450779 | chr17 | 81425666 | 81464425 | Thumpd2       |
| chr17 | 81056416 | 81450779 | chr17 | 80979851 | 81127433 | Map4k3        |
| chr17 | 81056416 | 81450779 | chr17 | 81343971 | 81401156 | Tmem178       |
| chr17 | 83259345 | 83754176 | chr17 | 83432931 | 83477565 | Gm19689       |
| chr17 | 83259345 | 83754176 | chr17 | 83614622 | 83624409 | Pkdcc         |
| chr17 | 83259345 | 83754176 | chr17 | 83750270 | 83879699 | Eml4          |
| chr18 | 10046807 | 10162362 | chr18 | 10064398 | 10181790 | Rock1         |
| chr18 | 34398127 | 34616261 | chr18 | 34490798 | 34496253 | Srp19         |
| chr18 | 34398127 | 34616261 | chr18 | 34504539 | 34533069 | Reep5         |
| chr18 | 34398127 | 34616261 | chr18 | 34569076 | 34602442 | Pkd2l2        |
| chr18 | 34398127 | 34616261 | chr18 | 34380637 | 34481844 | Apc           |
| chr18 | 34398127 | 34616261 | chr18 | 34602004 | 34666477 | Fam13b        |
| chr18 | 35951154 | 36078359 | chr18 | 35931212 | 35966826 | Ube2d2a       |
| chr18 | 35951154 | 36078359 | chr18 | 35989471 | 36021342 | Cxxc5         |
| chr18 | 60844495 | 60995523 | chr18 | 60934249 | 60938200 | Rps14         |
| chr18 | 60844495 | 60995523 | chr18 | 60971729 | 60971817 | Mir5107       |
| chr18 | 60844495 | 60995523 | chr18 | 60845629 | 60873043 | Ndst1         |
| chr18 | 60844495 | 60995523 | chr18 | 60963502 | 60972306 | Cd74          |
| chr18 | 60844495 | 60995523 | chr18 | 60973409 | 61008618 | Tcof1         |
| chr18 | 77899473 | 78145841 | chr18 | 77952922 | 77954184 | 4930465K10Rik |
| chr18 | 77899473 | 78145841 | chr18 | 77872019 | 77952749 | 8030462N17Rik |
| chr18 | 77899473 | 78145841 | chr18 | 77996305 | 78006519 | Haus1         |
| chr18 | 77899473 | 78145841 | chr18 | 78012506 | 78021607 | Atp5a1        |
| chr18 | 77899473 | 78145841 | chr18 | 78135205 | 78231766 | Epg5          |
| chr18 | 77899473 | 78145841 | chr18 | 78033288 | 78121618 | Pstpip2       |
| chr19 | 58613184 | 58864147 | chr19 | 58773406 | 58775813 | 1810018F18Rik |

|       |           |           |       |           |           |               |
|-------|-----------|-----------|-------|-----------|-----------|---------------|
| chr19 | 58613184  | 58864147  | chr19 | 58680818  | 58704243  | 1810007D17Rik |
| chr19 | 58613184  | 58864147  | chr19 | 58744854  | 58756278  | Pnlip         |
| chr19 | 58613184  | 58864147  | chr19 | 58803376  | 58818659  | Pnliprp1      |
| chr19 | 58613184  | 58864147  | chr19 | 58860292  | 58868904  | 1700019N19Rik |
| chr19 | 58613184  | 58864147  | chr19 | 58586491  | 58627575  | Ccdc172       |
| chr19 | 58613184  | 58864147  | chr19 | 58834212  | 58852024  | Pnliprp2      |
| chr2  | 26250703  | 26463280  | chr2  | 26325578  | 26325639  | Mir6996       |
| chr2  | 26250703  | 26463280  | chr2  | 26446876  | 26446949  | Mir126        |
| chr2  | 26250703  | 26463280  | chr2  | 26446882  | 26446940  | Mir126b       |
| chr2  | 26250703  | 26463280  | chr2  | 26448576  | 26459937  | Agpat2        |
| chr2  | 26250703  | 26463280  | chr2  | 26244867  | 26252641  | Pmpca         |
| chr2  | 26250703  | 26463280  | chr2  | 26251768  | 26264708  | Inpp5e        |
| chr2  | 26250703  | 26463280  | chr2  | 26264950  | 26300736  | Sec16a        |
| chr2  | 26250703  | 26463280  | chr2  | 26436575  | 26448202  | Egfl7         |
| chr2  | 26250703  | 26463280  | chr2  | 26313421  | 26359342  | Notch1        |
| chr2  | 26890536  | 27033921  | chr2  | 26917155  | 26927681  | Tmem8c        |
| chr2  | 26890536  | 27033921  | chr2  | 26934900  | 26964133  | Adamtsl2      |
| chr2  | 26890536  | 27033921  | chr2  | 26965898  | 26997997  | Fam163b       |
| chr2  | 26890536  | 27033921  | chr2  | 27021026  | 27038724  | Dbh           |
| chr2  | 26890536  | 27033921  | chr2  | 27000417  | 27018223  | Dbhos         |
| chr2  | 29600995  | 29735576  | chr2  | 29617047  | 29619609  | Gm13547       |
| chr2  | 29600995  | 29735576  | chr2  | 29643782  | 29653263  | Coq4          |
| chr2  | 29600995  | 29735576  | chr2  | 29701150  | 29701247  | Mir219-2      |
| chr2  | 29600995  | 29735576  | chr2  | 29701166  | 29701231  | Mir219b       |
| chr2  | 29600995  | 29735576  | chr2  | 29631630  | 29643191  | Trub2         |
| chr2  | 29600995  | 29735576  | chr2  | 29658199  | 29673042  | Slc27a4       |
| chr2  | 29600995  | 29735576  | chr2  | 29682908  | 29700516  | Urm1          |
| chr2  | 29600995  | 29735576  | chr2  | 29725013  | 29738360  | Cercam        |
| chr2  | 33040320  | 33330776  | chr2  | 33071480  | 33103234  | Angptl2       |
| chr2  | 33040320  | 33330776  | chr2  | 33261627  | 33286844  | Zbtb34        |
| chr2  | 33040320  | 33330776  | chr2  | 33305807  | 33324052  | Zbtb43        |
| chr2  | 33040320  | 33330776  | chr2  | 32992492  | 33226998  | Ralgps1       |
| chr2  | 71403066  | 71650510  | chr2  | 71557473  | 71569023  | Gm1631        |
| chr2  | 71403066  | 71650510  | chr2  | 71624995  | 71696484  | Itga6         |
| chr2  | 73158172  | 73281832  | chr2  | 73150708  | 73175864  | Scrn3         |
| chr2  | 73158172  | 73281832  | chr2  | 73179562  | 73224537  | Gpr155        |
| chr2  | 73158172  | 73281832  | chr2  | 73267673  | 73367467  | Wipf1         |
| chr2  | 74625650  | 74769762  | chr2  | 74663868  | 74714805  | Mtx2          |
| chr2  | 92555797  | 92900662  | chr2  | 92755257  | 92796208  | Syt13         |
| chr2  | 92555797  | 92900662  | chr2  | 92815062  | 92886301  | Prdm11        |
| chr2  | 117441496 | 118096942 | chr2  | 117937657 | 117952869 | Thbs1         |
| chr2  | 117441496 | 118096942 | chr2  | 118030623 | 118082702 | Fsip1         |
| chr2  | 117441496 | 118096942 | chr2  | 117647663 | 117734872 | 4930412B13Rik |
| chr2  | 120300040 | 120648131 | chr2  | 120429973 | 120435244 | Lrrc57        |
| chr2  | 120300040 | 120648131 | chr2  | 120332565 | 120389567 | Zfp106        |
| chr2  | 120300040 | 120648131 | chr2  | 120393406 | 120426458 | Snap23        |
| chr2  | 120300040 | 120648131 | chr2  | 120435171 | 120446554 | Haus2         |

|      |           |           |      |           |           |               |
|------|-----------|-----------|------|-----------|-----------|---------------|
| chr2 | 120300040 | 120648131 | chr2 | 120541889 | 120557253 | Cdan1         |
| chr2 | 120300040 | 120648131 | chr2 | 120289328 | 120330655 | Capn3         |
| chr2 | 120300040 | 120648131 | chr2 | 120558551 | 120676320 | Ttbk2         |
| chr2 | 126581738 | 126765760 | chr2 | 126727985 | 126728121 | Mir3473g      |
| chr2 | 126581738 | 126765760 | chr2 | 126533063 | 126585050 | Usp8          |
| chr2 | 126581738 | 126765760 | chr2 | 126586785 | 126609196 | Usp50         |
| chr2 | 126581738 | 126765760 | chr2 | 126617293 | 126701997 | Trpm7         |
| chr2 | 126581738 | 126765760 | chr2 | 126716130 | 126758971 | Sppl2a        |
| chr2 | 130197018 | 130328283 | chr2 | 130230994 | 130231810 | 1700020A23Rik |
| chr2 | 130197018 | 130328283 | chr2 | 130232257 | 130233530 | Tmem239       |
| chr2 | 130197018 | 130328283 | chr2 | 130243419 | 130250377 | Pced1a        |
| chr2 | 130197018 | 130328283 | chr2 | 130216510 | 130223365 | Cpxm1         |
| chr2 | 130197018 | 130328283 | chr2 | 130250055 | 130270005 | Vps16         |
| chr2 | 130197018 | 130328283 | chr2 | 130276013 | 130380036 | Ptpa          |
| chr2 | 130773362 | 131009286 | chr2 | 130865367 | 130868824 | Gfra4         |
| chr2 | 130773362 | 131009286 | chr2 | 130866054 | 130866134 | Mir6973b      |
| chr2 | 130773362 | 131009286 | chr2 | 130876552 | 130889550 | Adam33        |
| chr2 | 130773362 | 131009286 | chr2 | 130995996 | 131000546 | Spf1          |
| chr2 | 130773362 | 131009286 | chr2 | 131003024 | 131005748 | Cenpb         |
| chr2 | 130773362 | 131009286 | chr2 | 130894955 | 130912501 | Siglec1       |
| chr2 | 130773362 | 131009286 | chr2 | 130953147 | 130971719 | Hspa12b       |
| chr2 | 130773362 | 131009286 | chr2 | 130972060 | 130985756 | 1700037H04Rik |
| chr2 | 130773362 | 131009286 | chr2 | 130732231 | 130856062 | Atrn          |
| chr2 | 154545500 | 154734429 | chr2 | 154697145 | 154718642 | Eif2s2        |
| chr2 | 154545500 | 154734429 | chr2 | 154616845 | 154692997 | Raly          |
| chr2 | 155413169 | 155640152 | chr2 | 155448615 | 155448694 | Mir499        |
| chr2 | 155413169 | 155640152 | chr2 | 155576952 | 155581214 | Procr         |
| chr2 | 155413169 | 155640152 | chr2 | 155388918 | 155418442 | Gss           |
| chr2 | 155413169 | 155640152 | chr2 | 155460012 | 155518120 | Trpc4ap       |
| chr2 | 155413169 | 155640152 | chr2 | 155527408 | 155555211 | Edem2         |
| chr2 | 155413169 | 155640152 | chr2 | 155601079 | 155644102 | Mmp24         |
| chr2 | 155413169 | 155640152 | chr2 | 155436978 | 155460043 | Myh7b         |
| chr2 | 155653591 | 156168197 | chr2 | 155654918 | 155660590 | Fam83c        |
| chr2 | 155653591 | 156168197 | chr2 | 155766760 | 155771100 | Gdf5          |
| chr2 | 155653591 | 156168197 | chr2 | 155833860 | 155844015 | Ergic3        |
| chr2 | 155653591 | 156168197 | chr2 | 155969888 | 155971530 | Romo1         |
| chr2 | 155653591 | 156168197 | chr2 | 156137581 | 156138440 | Scand1        |
| chr2 | 155653591 | 156168197 | chr2 | 155782293 | 155824636 | Cep250        |
| chr2 | 155653591 | 156168197 | chr2 | 155826178 | 155833713 | 6430550D23Rik |
| chr2 | 155653591 | 156168197 | chr2 | 155844875 | 155878683 | Fer1l4        |
| chr2 | 155653591 | 156168197 | chr2 | 155890948 | 155895235 | Spag4         |
| chr2 | 155653591 | 156168197 | chr2 | 155897576 | 155937701 | Cpne1         |
| chr2 | 155653591 | 156168197 | chr2 | 155920617 | 155937701 | Rbm12         |
| chr2 | 155653591 | 156168197 | chr2 | 155949372 | 155969922 | Nfs1          |
| chr2 | 155653591 | 156168197 | chr2 | 156138208 | 156201374 | Cnbd2         |
| chr2 | 155653591 | 156168197 | chr2 | 155672621 | 155756046 | Uqcc1         |
| chr2 | 155653591 | 156168197 | chr2 | 155972974 | 156005976 | Rbm39         |

|      |           |           |      |           |           |               |
|------|-----------|-----------|------|-----------|-----------|---------------|
| chr2 | 155653591 | 156168197 | chr2 | 156022382 | 156135689 | Phf20         |
| chr2 | 156837813 | 157105434 | chr2 | 156912790 | 156922217 | Tldc2         |
| chr2 | 156837813 | 157105434 | chr2 | 156923264 | 156960958 | Samhd1        |
| chr2 | 156837813 | 157105434 | chr2 | 157034283 | 157105285 | Mroh8         |
| chr2 | 156837813 | 157105434 | chr2 | 157104833 | 157152054 | Rpn2          |
| chr2 | 156837813 | 157105434 | chr2 | 156836177 | 156905001 | 9830001H06Rik |
| chr2 | 156837813 | 157105434 | chr2 | 156971629 | 157030270 | Rbl1          |
| chr2 | 163838059 | 164041949 | chr2 | 163989354 | 163996849 | Kcns1         |
| chr2 | 163838059 | 164041949 | chr2 | 164014966 | 164016294 | Wfdc12        |
| chr2 | 163838059 | 164041949 | chr2 | 164024607 | 164025853 | Wfdc15a       |
| chr2 | 163838059 | 164041949 | chr2 | 164040189 | 164047399 | Wfdc15b       |
| chr2 | 163838059 | 164041949 | chr2 | 163850959 | 163876274 | Pabpc1l       |
| chr2 | 163838059 | 164041949 | chr2 | 163879276 | 163896838 | Tomm34        |
| chr2 | 163838059 | 164041949 | chr2 | 164002060 | 164008478 | Wfdc5         |
| chr2 | 163838059 | 164041949 | chr2 | 163820932 | 163844323 | Ywhab         |
| chr2 | 163838059 | 164041949 | chr2 | 163899913 | 163981257 | Stk4          |
| chr2 | 164181292 | 164378617 | chr2 | 164179805 | 164182243 | Slpi          |
| chr2 | 164181292 | 164378617 | chr2 | 164286470 | 164291010 | Sys1          |
| chr2 | 164181292 | 164378617 | chr2 | 164215128 | 164230660 | Matn4         |
| chr2 | 164181292 | 164378617 | chr2 | 164249746 | 164268688 | Sdc4          |
| chr2 | 164181292 | 164378617 | chr2 | 164295803 | 164299224 | Trp53tg5      |
| chr2 | 164181292 | 164378617 | chr2 | 164311639 | 164318823 | Dbnnd2        |
| chr2 | 164181292 | 164378617 | chr2 | 164323024 | 164333801 | Pigt          |
| chr2 | 164181292 | 164378617 | chr2 | 164228693 | 164240948 | Rbpjl         |
| chr2 | 164472798 | 164628803 | chr2 | 164481545 | 164482868 | Wfdc10        |
| chr2 | 164472798 | 164628803 | chr2 | 164524000 | 164527948 | Spint4        |
| chr2 | 164472798 | 164628803 | chr2 | 164540804 | 164543568 | Spint5        |
| chr2 | 164472798 | 164628803 | chr2 | 164595428 | 164598402 | Ube2c         |
| chr2 | 164472798 | 164628803 | chr2 | 164602661 | 164605234 | Tnnc2         |
| chr2 | 164472798 | 164628803 | chr2 | 164611520 | 164618270 | Snx21         |
| chr2 | 164472798 | 164628803 | chr2 | 164475124 | 164480466 | Wfdc9         |
| chr2 | 164472798 | 164628803 | chr2 | 164510606 | 164513206 | Wfdc13        |
| chr2 | 164472798 | 164628803 | chr2 | 164556725 | 164568767 | Wfdc3         |
| chr2 | 164472798 | 164628803 | chr2 | 164571514 | 164593719 | Dnttip1       |
| chr2 | 164472798 | 164628803 | chr2 | 164488393 | 164499587 | Wfdc11        |
| chr2 | 164472798 | 164628803 | chr2 | 164618267 | 164630381 | Acot8         |
| chr3 | 84965427  | 85447670  | chr3 | 85121440  | 85135949  | 1700036G14Rik |
| chr3 | 84965427  | 85447670  | chr3 | 85378050  | 85458392  | Pet112        |
| chr3 | 88723911  | 88963418  | chr3 | 88887900  | 88897285  | Rusc1         |
| chr3 | 88723911  | 88963418  | chr3 | 88950696  | 88964079  | Hcn3          |
| chr3 | 88723911  | 88963418  | chr3 | 88897509  | 88905889  | Fdps          |
| chr3 | 88723911  | 88963418  | chr3 | 88940063  | 88950516  | Pklr          |
| chr3 | 88723911  | 88963418  | chr3 | 88724724  | 88754204  | Dap3          |
| chr3 | 88723911  | 88963418  | chr3 | 88769733  | 88883297  | Ash1l         |
| chr3 | 89068977  | 89455787  | chr3 | 89070382  | 89071001  | Dpm3          |
| chr3 | 89068977  | 89455787  | chr3 | 89072167  | 89074492  | Slc50a1       |
| chr3 | 89068977  | 89455787  | chr3 | 89118872  | 89126801  | Efna3         |

|      |           |           |      |           |           |               |
|------|-----------|-----------|------|-----------|-----------|---------------|
| chr3 | 89068977  | 89455787  | chr3 | 89137314  | 89141950  | Efna4         |
| chr3 | 89068977  | 89455787  | chr3 | 89195785  | 89202701  | Gm15417       |
| chr3 | 89068977  | 89455787  | chr3 | 89205817  | 89206572  | Lenep         |
| chr3 | 89068977  | 89455787  | chr3 | 89219393  | 89222213  | Cks1b         |
| chr3 | 89068977  | 89455787  | chr3 | 89234758  | 89239050  | Pygo2         |
| chr3 | 89068977  | 89455787  | chr3 | 89263039  | 89272931  | Pmvk          |
| chr3 | 89068977  | 89455787  | chr3 | 89075651  | 89084873  | Efna1         |
| chr3 | 89068977  | 89455787  | chr3 | 89143561  | 89153932  | Adam15        |
| chr3 | 89068977  | 89455787  | chr3 | 89154156  | 89169161  | Dcst1         |
| chr3 | 89068977  | 89455787  | chr3 | 89181567  | 89197125  | Zbtb7b        |
| chr3 | 89068977  | 89455787  | chr3 | 89206594  | 89215785  | Flad1         |
| chr3 | 89068977  | 89455787  | chr3 | 89222472  | 89233951  | Shc1          |
| chr3 | 89068977  | 89455787  | chr3 | 89240625  | 89254874  | Pbxip1        |
| chr3 | 89068977  | 89455787  | chr3 | 89324085  | 89476416  | Kcnn3         |
| chr3 | 89611148  | 89836214  | chr3 | 89802681  | 89805247  | Gm19710       |
| chr3 | 89611148  | 89836214  | chr3 | 89673245  | 89717084  | Il6ra         |
| chr3 | 89611148  | 89836214  | chr3 | 89743402  | 89767254  | Atp8b2        |
| chr3 | 89611148  | 89836214  | chr3 | 89799367  | 89802638  | Hax1          |
| chr3 | 89611148  | 89836214  | chr3 | 89803510  | 89856437  | Ubap2l        |
| chr3 | 89611148  | 89836214  | chr3 | 89635291  | 89662768  | She           |
| chr3 | 95055531  | 95168226  | chr3 | 95057595  | 95085998  | Prune         |
| chr3 | 95055531  | 95168226  | chr3 | 95086856  | 95100086  | Fam63a        |
| chr3 | 95055531  | 95168226  | chr3 | 95100015  | 95111098  | Anxa9         |
| chr3 | 95055531  | 95168226  | chr3 | 95119173  | 95127490  | Cers2         |
| chr3 | 95055531  | 95168226  | chr3 | 95127446  | 95161124  | Setdb1        |
| chr3 | 130780352 | 130886665 | chr3 | 130813214 | 130927275 | Lef1          |
| chr3 | 136313362 | 136426960 | chr3 | 136333733 | 136598743 | Ppp3ca        |
| chr4 | 43475766  | 43905234  | chr4 | 43494954  | 43496581  | Sit1          |
| chr4 | 43475766  | 43905234  | chr4 | 43505656  | 43505931  | Rmrp          |
| chr4 | 43475766  | 43905234  | chr4 | 43506236  | 43508793  | Ccdc107       |
| chr4 | 43475766  | 43905234  | chr4 | 43509015  | 43512532  | Arhgef39      |
| chr4 | 43475766  | 43905234  | chr4 | 43519897  | 43526597  | Car9          |
| chr4 | 43475766  | 43905234  | chr4 | 43575505  | 43579932  | Creb3         |
| chr4 | 43475766  | 43905234  | chr4 | 43596087  | 43597366  | Msmg          |
| chr4 | 43475766  | 43905234  | chr4 | 43664600  | 43666424  | Spag8         |
| chr4 | 43475766  | 43905234  | chr4 | 43667098  | 43669317  | Hint2         |
| chr4 | 43475766  | 43905234  | chr4 | 43718499  | 43719438  | Olf1r71       |
| chr4 | 43475766  | 43905234  | chr4 | 43740069  | 43740982  | Hrct1         |
| chr4 | 43475766  | 43905234  | chr4 | 43764730  | 43772336  | A630077J23Rik |
| chr4 | 43475766  | 43905234  | chr4 | 43782921  | 43783881  | Olf1r159      |
| chr4 | 43475766  | 43905234  | chr4 | 43833206  | 43834305  | Olf1r156      |
| chr4 | 43475766  | 43905234  | chr4 | 43847623  | 43849389  | Olf1r157      |
| chr4 | 43475766  | 43905234  | chr4 | 43867163  | 43868335  | Olf1r155      |
| chr4 | 43475766  | 43905234  | chr4 | 43526597  | 43536426  | Tpm2          |
| chr4 | 43475766  | 43905234  | chr4 | 43544384  | 43575455  | Tln1          |
| chr4 | 43475766  | 43905234  | chr4 | 43579799  | 43591736  | Gba2          |
| chr4 | 43475766  | 43905234  | chr4 | 43591606  | 43600359  | Rgp1          |

|      |           |           |      |           |           |               |
|------|-----------|-----------|------|-----------|-----------|---------------|
| chr4 | 43475766  | 43905234  | chr4 | 43672493  | 43681731  | Fam221b       |
| chr4 | 43475766  | 43905234  | chr4 | 43681842  | 43705539  | Tmem8b        |
| chr4 | 43475766  | 43905234  | chr4 | 43707871  | 43713679  | Olfr70        |
| chr4 | 43475766  | 43905234  | chr4 | 43742905  | 43747406  | 5430416O09Rik |
| chr4 | 43475766  | 43905234  | chr4 | 43794236  | 43795199  | Olfr29-ps1    |
| chr4 | 43475766  | 43905234  | chr4 | 43644806  | 43664112  | Npr2          |
| chr4 | 43475766  | 43905234  | chr4 | 43888401  | 43957678  | Reck          |
| chr4 | 55535128  | 56400197  | chr4 | 55540008  | 55545347  | Klf4          |
| chr4 | 106665525 | 106783852 | chr4 | 106728478 | 106739471 | Mrpl37        |
| chr4 | 106665525 | 106783852 | chr4 | 106742772 | 106757410 | Cyb5rl        |
| chr4 | 106665525 | 106783852 | chr4 | 106769495 | 106780353 | Cdcp2         |
| chr4 | 106665525 | 106783852 | chr4 | 106584074 | 106722299 | Ssbp3         |
| chr4 | 107103009 | 107342566 | chr4 | 107107323 | 107307664 | Glis1         |
| chr4 | 107534591 | 107813481 | chr4 | 107552359 | 107560029 | Magoh         |
| chr4 | 107534591 | 107813481 | chr4 | 107562503 | 107570407 | 0610037L13Rik |
| chr4 | 107534591 | 107813481 | chr4 | 107759961 | 107760054 | Mir6397       |
| chr4 | 107534591 | 107813481 | chr4 | 107576586 | 107596194 | Cpt2          |
| chr4 | 107534591 | 107813481 | chr4 | 107640938 | 107686137 | Slc1a7        |
| chr4 | 107534591 | 107813481 | chr4 | 107687397 | 107704695 | Podn          |
| chr4 | 107534591 | 107813481 | chr4 | 107474863 | 107549445 | Lrp8          |
| chr4 | 107534591 | 107813481 | chr4 | 107716434 | 107791152 | Scp2          |
| chr4 | 108656678 | 108765428 | chr4 | 108690259 | 108690335 | Mir761        |
| chr4 | 108656678 | 108765428 | chr4 | 108673409 | 108734376 | Nrd1          |
| chr4 | 108656678 | 108765428 | chr4 | 108733749 | 108874877 | Osbpl9        |
| chr4 | 116687362 | 116792770 | chr4 | 116791822 | 116798330 | Btbd19        |
| chr4 | 116687362 | 116792770 | chr4 | 116692012 | 116759457 | Eif2b3        |
| chr4 | 116687362 | 116792770 | chr4 | 116768960 | 116787436 | Ptch2         |
| chr4 | 117503080 | 117643603 | chr4 | 117541866 | 117545075 | Ccdc24        |
| chr4 | 117503080 | 117643603 | chr4 | 117556934 | 117559934 | Atp6v0b       |
| chr4 | 117503080 | 117643603 | chr4 | 117561247 | 117564608 | Dph2          |
| chr4 | 117503080 | 117643603 | chr4 | 117598764 | 117602368 | Artn          |
| chr4 | 117503080 | 117643603 | chr4 | 117507862 | 117541910 | Slc6a9        |
| chr4 | 117503080 | 117643603 | chr4 | 117545604 | 117556081 | B4galt2       |
| chr4 | 117503080 | 117643603 | chr4 | 117567097 | 117587604 | Ipo13         |
| chr4 | 117503080 | 117643603 | chr4 | 117604757 | 117807551 | St3gal3       |
| chr4 | 118049465 | 118190490 | chr4 | 118081941 | 118088387 | Med8          |
| chr4 | 118049465 | 118190490 | chr4 | 118100697 | 118105557 | Elovl1        |
| chr4 | 118049465 | 118190490 | chr4 | 118105505 | 118109948 | Cdc20         |
| chr4 | 118049465 | 118190490 | chr4 | 118035344 | 118081868 | Szt2          |
| chr4 | 118049465 | 118190490 | chr4 | 118115019 | 118130118 | Mpl           |
| chr4 | 118049465 | 118190490 | chr4 | 118143795 | 118162454 | Tie1          |
| chr4 | 119585467 | 119997563 | chr4 | 119834028 | 119839965 | Edn2          |
| chr4 | 119585467 | 119997563 | chr4 | 119939682 | 119959866 | Foxo6         |
| chr4 | 119585467 | 119997563 | chr4 | 119487282 | 119808016 | Hivep3        |
| chr4 | 128918088 | 129631868 | chr4 | 129166251 | 129168014 | Tssk3         |
| chr4 | 128918088 | 129631868 | chr4 | 129168433 | 129169200 | Fam229a       |
| chr4 | 128918088 | 129631868 | chr4 | 129190824 | 129193225 | Marcksl1      |



|      |           |           |      |           |           |               |
|------|-----------|-----------|------|-----------|-----------|---------------|
| chr4 | 128918088 | 129631868 | chr4 | 129234926 | 129235055 | Mir8119       |
| chr4 | 128918088 | 129631868 | chr4 | 129254058 | 129255824 | Fam167b       |
| chr4 | 128918088 | 129631868 | chr4 | 129277950 | 129285123 | Tmem234       |
| chr4 | 128918088 | 129631868 | chr4 | 129292860 | 129296337 | lqcc          |
| chr4 | 128918088 | 129631868 | chr4 | 129296517 | 129301152 | Ccdc28b       |
| chr4 | 128918088 | 129631868 | chr4 | 129303320 | 129318309 | Txlna         |
| chr4 | 128918088 | 129631868 | chr4 | 129361743 | 129361815 | Mir7016       |
| chr4 | 128918088 | 129631868 | chr4 | 129583469 | 129586240 | E330017L17Rik |
| chr4 | 128918088 | 129631868 | chr4 | 128896821 | 128938648 | C77080        |
| chr4 | 128918088 | 129631868 | chr4 | 128984343 | 129012614 | Rbbp4         |
| chr4 | 128918088 | 129631868 | chr4 | 129013269 | 129024273 | Zbtb8os       |
| chr4 | 128918088 | 129631868 | chr4 | 129030875 | 129055272 | Zbtb8a        |
| chr4 | 128918088 | 129631868 | chr4 | 129138922 | 129165676 | Bsdc1         |
| chr4 | 128918088 | 129631868 | chr4 | 129193347 | 129219890 | Hdac1         |
| chr4 | 128918088 | 129631868 | chr4 | 129269217 | 129277892 | Eif3i         |
| chr4 | 128918088 | 129631868 | chr4 | 129285574 | 129291501 | Dcdc2b        |
| chr4 | 128918088 | 129631868 | chr4 | 129321222 | 129350011 | Kpna6         |
| chr4 | 128918088 | 129631868 | chr4 | 129380412 | 129419547 | Khdrbs1       |
| chr4 | 128918088 | 129631868 | chr4 | 129103008 | 129118062 | Zbtb8b        |
| chr4 | 128918088 | 129631868 | chr4 | 129225587 | 129250885 | Lck           |
| chr4 | 128918088 | 129631868 | chr4 | 129353598 | 129374082 | Tmem39b       |
| chr4 | 128918088 | 129631868 | chr4 | 129497722 | 129527247 | Ptp4a2        |
| chr4 | 128918088 | 129631868 | chr4 | 128964864 | 128985803 | Sync          |
| chr4 | 129703586 | 129887046 | chr4 | 129784799 | 129805378 | Pef1          |
| chr4 | 129703586 | 129887046 | chr4 | 129807460 | 129816406 | Hcrtr1        |
| chr4 | 129703586 | 129887046 | chr4 | 129842843 | 129852366 | Tinagl1       |
| chr4 | 129703586 | 129887046 | chr4 | 129725083 | 129776521 | Col16a1       |
| chr4 | 129703586 | 129887046 | chr4 | 129886352 | 129899539 | Gm853         |
| chr4 | 130123401 | 130299008 | chr4 | 130125704 | 130169623 | Nkain1        |
| chr4 | 130123401 | 130299008 | chr4 | 130219273 | 130337479 | Pum1          |
| chr4 | 131783195 | 132439189 | chr4 | 131825993 | 131826101 | Rnu11         |
| chr4 | 131783195 | 132439189 | chr4 | 131864592 | 131866939 | Snhg12        |
| chr4 | 131783195 | 132439189 | chr4 | 131865379 | 131865515 | Snora16a      |
| chr4 | 131783195 | 132439189 | chr4 | 131865867 | 131865984 | Snora44       |
| chr4 | 131783195 | 132439189 | chr4 | 131866221 | 131866283 | Snora61       |
| chr4 | 131783195 | 132439189 | chr4 | 131866617 | 131866673 | Snord99       |
| chr4 | 131783195 | 132439189 | chr4 | 131907847 | 131909601 | Snhg3         |
| chr4 | 131783195 | 132439189 | chr4 | 132014643 | 132019836 | Med18         |
| chr4 | 131783195 | 132439189 | chr4 | 132382839 | 132399084 | Ppp1r8        |
| chr4 | 131783195 | 132439189 | chr4 | 131776939 | 131817464 | Gmeb1         |
| chr4 | 131783195 | 132439189 | chr4 | 131830289 | 131849244 | Taf12         |
| chr4 | 131783195 | 132439189 | chr4 | 131867677 | 131885453 | Trnau1ap      |
| chr4 | 131783195 | 132439189 | chr4 | 131887833 | 131901665 | Rcc1          |
| chr4 | 131783195 | 132439189 | chr4 | 131911838 | 131978361 | Phactr4       |
| chr4 | 131783195 | 132439189 | chr4 | 132048721 | 132066371 | Sesn2         |
| chr4 | 131783195 | 132439189 | chr4 | 132086469 | 132089574 | Atpif1        |
| chr4 | 131783195 | 132439189 | chr4 | 132091473 | 132109657 | Dnajc8        |

|      |           |           |      |           |           |               |
|------|-----------|-----------|------|-----------|-----------|---------------|
| chr4 | 131783195 | 132439189 | chr4 | 132280818 | 132288461 | Xkr8          |
| chr4 | 131783195 | 132439189 | chr4 | 132288880 | 132313086 | Smpdl3b       |
| chr4 | 131783195 | 132439189 | chr4 | 132324274 | 132334661 | Rpa2          |
| chr4 | 131783195 | 132439189 | chr4 | 132338271 | 132352279 | Themis2       |
| chr4 | 131783195 | 132439189 | chr4 | 132409978 | 132440373 | Stx12         |
| chr4 | 131783195 | 132439189 | chr4 | 131858108 | 131859271 | Rab42         |
| chr4 | 131783195 | 132439189 | chr4 | 132194960 | 132280680 | Eya3          |
| chr4 | 131783195 | 132439189 | chr4 | 132119981 | 132136781 | Ptafr         |
| chr4 | 133019259 | 133350267 | chr4 | 133074877 | 133086705 | 1810019J16Rik |
| chr4 | 133019259 | 133350267 | chr4 | 133088456 | 133101942 | Nudc          |
| chr4 | 133019259 | 133350267 | chr4 | 133109304 | 133112451 | Nr0b2         |
| chr4 | 133019259 | 133350267 | chr4 | 133140287 | 133147650 | Gpn2          |
| chr4 | 133019259 | 133350267 | chr4 | 133156470 | 133158083 | Sfn           |
| chr4 | 133019259 | 133350267 | chr4 | 133272964 | 133273023 | Mir7227       |
| chr4 | 133019259 | 133350267 | chr4 | 133047014 | 133054465 | Trnp1         |
| chr4 | 133019259 | 133350267 | chr4 | 133130659 | 133140157 | Gpatch3       |
| chr4 | 133019259 | 133350267 | chr4 | 133217339 | 133228562 | Pigv          |
| chr4 | 133019259 | 133350267 | chr4 | 133036047 | 133043855 | Fam46b        |
| chr4 | 133019259 | 133350267 | chr4 | 133234922 | 133309526 | Arid1a        |
| chr4 | 133019259 | 133350267 | chr4 | 133162906 | 133189344 | Zdhhc18       |
| chr4 | 133959443 | 135108168 | chr4 | 134024234 | 134029758 | Stmn1         |
| chr4 | 133959443 | 135108168 | chr4 | 134123637 | 134123766 | Mir6403       |
| chr4 | 133959443 | 135108168 | chr4 | 134486894 | 134493452 | Syf2          |
| chr4 | 133959443 | 135108168 | chr4 | 134972469 | 134972548 | Mir700        |
| chr4 | 133959443 | 135108168 | chr4 | 134004679 | 134006086 | 1700021N21Rik |
| chr4 | 133959443 | 135108168 | chr4 | 134052675 | 134066152 | Paqr7         |
| chr4 | 133959443 | 135108168 | chr4 | 134066913 | 134079837 | Clhc1         |
| chr4 | 133959443 | 135108168 | chr4 | 134093806 | 134108081 | Sepn1         |
| chr4 | 133959443 | 135108168 | chr4 | 134301326 | 134323919 | Ldlrap1       |
| chr4 | 133959443 | 135108168 | chr4 | 134358675 | 134409260 | Tmem57        |
| chr4 | 133959443 | 135108168 | chr4 | 134420450 | 134452087 | Rhd           |
| chr4 | 133959443 | 135108168 | chr4 | 134453763 | 134470831 | Tmem50a       |
| chr4 | 133959443 | 135108168 | chr4 | 134676559 | 134733905 | Runx3         |
| chr4 | 133959443 | 135108168 | chr4 | 134769884 | 134828675 | Clic4         |
| chr4 | 133959443 | 135108168 | chr4 | 134876398 | 134909129 | Srrm1         |
| chr4 | 133959443 | 135108168 | chr4 | 134925491 | 134954142 | Ncmap         |
| chr4 | 133959443 | 135108168 | chr4 | 134968223 | 134989720 | Rcan3         |
| chr4 | 133959443 | 135108168 | chr4 | 135004815 | 135050419 | Nipal3        |
| chr4 | 133959443 | 135108168 | chr4 | 135051901 | 135093718 | Stpg1         |
| chr4 | 133959443 | 135108168 | chr4 | 135097802 | 135129535 | Grhl3         |
| chr4 | 133959443 | 135108168 | chr4 | 133952234 | 133983327 | Pafah2        |
| chr4 | 133959443 | 135108168 | chr4 | 134081469 | 134091302 | Mtfr1l        |
| chr4 | 133959443 | 135108168 | chr4 | 134479539 | 134483285 | D4Wsu53e      |
| chr4 | 133959443 | 135108168 | chr4 | 134117604 | 134260205 | Man1c1        |
| chr4 | 135492556 | 135999204 | chr4 | 135521079 | 135524093 | Gale          |
| chr4 | 135492556 | 135999204 | chr4 | 135531516 | 135543159 | Pithd1        |
| chr4 | 135492556 | 135999204 | chr4 | 135605862 | 135609286 | Rpl11         |

|      |           |           |      |           |           |               |
|------|-----------|-----------|------|-----------|-----------|---------------|
| chr4 | 135492556 | 135999204 | chr4 | 135699736 | 135701307 | Id3           |
| chr4 | 135492556 | 135999204 | chr4 | 135841983 | 135849857 | Zfp46         |
| chr4 | 135492556 | 135999204 | chr4 | 135476640 | 135496215 | Fuca1         |
| chr4 | 135492556 | 135999204 | chr4 | 135502367 | 135518532 | Hmgcl         |
| chr4 | 135492556 | 135999204 | chr4 | 135559284 | 135577564 | Tceb3         |
| chr4 | 135492556 | 135999204 | chr4 | 135728308 | 135751971 | E2f2          |
| chr4 | 135492556 | 135999204 | chr4 | 135803871 | 135830814 | Tcea3         |
| chr4 | 135492556 | 135999204 | chr4 | 135866856 | 135901894 | Hnrnpr        |
| chr4 | 135492556 | 135999204 | chr4 | 135979438 | 136000316 | Htr1d         |
| chr4 | 135492556 | 135999204 | chr4 | 135524139 | 135528509 | Lypla2        |
| chr4 | 135492556 | 135999204 | chr4 | 135762279 | 135802488 | Asap3         |
| chr4 | 136591302 | 137137135 | chr4 | 136714996 | 136720981 | Gm13003       |
| chr4 | 136591302 | 137137135 | chr4 | 136957468 | 136965706 | Gm13011       |
| chr4 | 136591302 | 137137135 | chr4 | 136976922 | 136986435 | Cela3b        |
| chr4 | 136591302 | 137137135 | chr4 | 137009210 | 137011376 | 1700013G24Rik |
| chr4 | 136591302 | 137137135 | chr4 | 137094200 | 137094285 | Mir7018       |
| chr4 | 136591302 | 137137135 | chr4 | 137126790 | 137131095 | Ldlrad2       |
| chr4 | 136591302 | 137137135 | chr4 | 136875610 | 136913674 | Cdc42         |
| chr4 | 136591302 | 137137135 | chr4 | 136535646 | 136604610 | Zbtb40        |
| chr4 | 136591302 | 137137135 | chr4 | 136833549 | 136855416 | Wnt4          |
| chr4 | 136591302 | 137137135 | chr4 | 137024717 | 137126545 | Hspg2         |
| chr4 | 138650979 | 138947795 | chr4 | 138731321 | 138736570 | Gm16287       |
| chr4 | 138650979 | 138947795 | chr4 | 138853919 | 138866615 | Pqlc2         |
| chr4 | 138650979 | 138947795 | chr4 | 138866658 | 138874701 | Akr7a5        |
| chr4 | 138650979 | 138947795 | chr4 | 138903359 | 138908213 | Mrto4         |
| chr4 | 138650979 | 138947795 | chr4 | 138908501 | 138934650 | Emc1          |
| chr4 | 138650979 | 138947795 | chr4 | 138936573 | 139045447 | Ubr4          |
| chr4 | 138650979 | 138947795 | chr4 | 138657728 | 138687028 | Minos1        |
| chr4 | 138650979 | 138947795 | chr4 | 138748813 | 138847735 | Capzb         |
| chr4 | 147277600 | 147549386 | chr4 | 147315003 | 147321423 | 2510039O18Rik |
| chr4 | 147277600 | 147549386 | chr4 | 147359896 | 147361314 | Nppb          |
| chr4 | 147277600 | 147549386 | chr4 | 147374854 | 147376176 | Nppa          |
| chr4 | 147277600 | 147549386 | chr4 | 147514598 | 147519805 | Mad2l2        |
| chr4 | 147277600 | 147549386 | chr4 | 147521044 | 147521105 | Mir7022       |
| chr4 | 147277600 | 147549386 | chr4 | 147526907 | 147534203 | Fbxo44        |
| chr4 | 147277600 | 147549386 | chr4 | 147247694 | 147279018 | Mfn2          |
| chr4 | 147277600 | 147549386 | chr4 | 147283861 | 147310885 | Plod1         |
| chr4 | 147277600 | 147549386 | chr4 | 147380592 | 147412876 | Cln6          |
| chr4 | 147277600 | 147549386 | chr4 | 147413185 | 147433671 | Mthfr         |
| chr4 | 147277600 | 147549386 | chr4 | 147472545 | 147504807 | Draxin        |
| chr4 | 147277600 | 147549386 | chr4 | 147519824 | 147526244 | Fbxo6         |
| chr4 | 147277600 | 147549386 | chr4 | 147534776 | 147540526 | Fbxo2         |
| chr4 | 147277600 | 147549386 | chr4 | 147451169 | 147462173 | Agtrap        |
| chr4 | 148281854 | 149392570 | chr4 | 148499299 | 148500850 | Cort          |
| chr4 | 148281854 | 149392570 | chr4 | 148823810 | 148829077 | Rbp7          |
| chr4 | 148281854 | 149392570 | chr4 | 148911971 | 148912031 | Mir5616       |
| chr4 | 148281854 | 149392570 | chr4 | 149029612 | 149029676 | Mir7023       |

|      |           |           |      |           |           |          |
|------|-----------|-----------|------|-----------|-----------|----------|
| chr4 | 148281854 | 149392570 | chr4 | 148478250 | 148494762 | Dffa     |
| chr4 | 148281854 | 149392570 | chr4 | 148524093 | 148540816 | Pgd      |
| chr4 | 148281854 | 149392570 | chr4 | 148842895 | 148859251 | Nmnat1   |
| chr4 | 148281854 | 149392570 | chr4 | 148859441 | 148870776 | Lzic     |
| chr4 | 148281854 | 149392570 | chr4 | 148919225 | 148940546 | Ctnnbip1 |
| chr4 | 148281854 | 149392570 | chr4 | 148960746 | 149022008 | Clstn1   |
| chr4 | 148281854 | 149392570 | chr4 | 149089483 | 149112177 | Tmem201  |
| chr4 | 148281854 | 149392570 | chr4 | 149118144 | 149148376 | Slc25a33 |
| chr4 | 148281854 | 149392570 | chr4 | 149353589 | 149383132 | H6pd     |
| chr4 | 148281854 | 149392570 | chr4 | 148178500 | 148329001 | Casz1    |
| chr4 | 148281854 | 149392570 | chr4 | 148334643 | 148473921 | Pex14    |
| chr4 | 148281854 | 149392570 | chr4 | 148502457 | 148511709 | Apitd1   |
| chr4 | 148281854 | 149392570 | chr4 | 148550429 | 148681807 | Kif1b    |
| chr4 | 148281854 | 149392570 | chr4 | 148702524 | 148800740 | Ube4b    |
| chr4 | 148281854 | 149392570 | chr4 | 149023276 | 149075738 | Pik3cd   |
| chr4 | 148281854 | 149392570 | chr4 | 149270392 | 149329115 | Spsb1    |
| chr4 | 148281854 | 149392570 | chr4 | 148892349 | 148940546 | Ctnnbip1 |
| chr4 | 149587561 | 149941754 | chr4 | 149611305 | 149622982 | Eno1     |
| chr4 | 149587561 | 149941754 | chr4 | 149611432 | 149622982 | Gm5506   |
| chr4 | 149587561 | 149941754 | chr4 | 149656024 | 149996075 | Rere     |
| chr5 | 30996886  | 31593178  | chr5 | 31208888  | 31210161  | Ost4     |
| chr5 | 30996886  | 31593178  | chr5 | 31216158  | 31223646  | Emilin1  |
| chr5 | 30996886  | 31593178  | chr5 | 31252438  | 31257468  | Abhd1    |
| chr5 | 30996886  | 31593178  | chr5 | 31351012  | 31357006  | Atraid   |
| chr5 | 30996886  | 31593178  | chr5 | 31410691  | 31414897  | Dnajc5g  |
| chr5 | 30996886  | 31593178  | chr5 | 31443033  | 31456615  | Mpv17    |
| chr5 | 30996886  | 31593178  | chr5 | 31495676  | 31501273  | Snx17    |
| chr5 | 30996886  | 31593178  | chr5 | 31501353  | 31504676  | Zfp513   |
| chr5 | 30996886  | 31593178  | chr5 | 31543290  | 31553935  | Nrbp1    |
| chr5 | 30996886  | 31593178  | chr5 | 31554078  | 31555570  | Krtcap3  |
| chr5 | 30996886  | 31593178  | chr5 | 31117128  | 31168479  | Mapre3   |
| chr5 | 30996886  | 31593178  | chr5 | 31172019  | 31179840  | Tmem214  |
| chr5 | 30996886  | 31593178  | chr5 | 31224267  | 31233619  | Khk      |
| chr5 | 30996886  | 31593178  | chr5 | 31235515  | 31247853  | Cgref1   |
| chr5 | 30996886  | 31593178  | chr5 | 31254039  | 31262734  | Preb     |
| chr5 | 30996886  | 31593178  | chr5 | 31271049  | 31279391  | Tcf23    |
| chr5 | 30996886  | 31593178  | chr5 | 31338408  | 31351297  | Slc5a6   |
| chr5 | 30996886  | 31593178  | chr5 | 31357183  | 31380852  | Cad      |
| chr5 | 30996886  | 31593178  | chr5 | 31388478  | 31395900  | Slc30a3  |
| chr5 | 30996886  | 31593178  | chr5 | 31418984  | 31439999  | Trim54   |
| chr5 | 30996886  | 31593178  | chr5 | 31440361  | 31441268  | Ucn      |
| chr5 | 30996886  | 31593178  | chr5 | 31458378  | 31482517  | Gtf3c2   |
| chr5 | 30996886  | 31593178  | chr5 | 31489930  | 31495512  | Eif2b4   |
| chr5 | 30996886  | 31593178  | chr5 | 31505040  | 31522918  | Ppm1g    |
| chr5 | 30996886  | 31593178  | chr5 | 31014267  | 31101742  | Dpysl5   |
| chr5 | 30996886  | 31593178  | chr5 | 31191224  | 31209039  | Agbl5    |
| chr5 | 30996886  | 31593178  | chr5 | 31555651  | 31593487  | Ift172   |

|      |           |           |      |           |           |          |
|------|-----------|-----------|------|-----------|-----------|----------|
| chr5 | 30996886  | 31593178  | chr5 | 31238397  | 31651218  | Mir6369  |
| chr5 | 33257884  | 33393852  | chr5 | 33361464  | 33370615  | Ywhah    |
| chr5 | 33257884  | 33393852  | chr5 | 33206369  | 33336882  | Depdc5   |
| chr5 | 34593741  | 34960965  | chr5 | 34916799  | 34916862  | Mir7036b |
| chr5 | 34593741  | 34960965  | chr5 | 34679038  | 34696079  | Rnf4     |
| chr5 | 34593741  | 34960965  | chr5 | 34838744  | 34856628  | Tnip2    |
| chr5 | 34593741  | 34960965  | chr5 | 34868432  | 34906288  | Sh3bp2   |
| chr5 | 34593741  | 34960965  | chr5 | 34916362  | 34974954  | Add1     |
| chr5 | 34593741  | 34960965  | chr5 | 34712581  | 34829107  | Fam193a  |
| chr5 | 34593741  | 34960965  | chr5 | 34537542  | 34630973  | Zfyve28  |
| chr5 | 65766727  | 65879500  | chr5 | 65739649  | 65775242  | Klb      |
| chr5 | 65766727  | 65879500  | chr5 | 65779602  | 65782670  | Rpl9     |
| chr5 | 65766727  | 65879500  | chr5 | 65804460  | 65827081  | Ugdh     |
| chr5 | 65766727  | 65879500  | chr5 | 65839993  | 65884074  | Smim14   |
| chr5 | 65766727  | 65879500  | chr5 | 65782735  | 65800446  | Lias     |
| chr5 | 75040638  | 75600276  | chr5 | 75471625  | 75473918  | Gsx2     |
| chr5 | 75040638  | 75600276  | chr5 | 75572855  | 75572929  | Mir7025  |
| chr5 | 75040638  | 75600276  | chr5 | 74988471  | 75098928  | Lnx1     |
| chr5 | 75040638  | 75600276  | chr5 | 75345218  | 75362393  | Gm6116   |
| chr5 | 75040638  | 75600276  | chr5 | 75402448  | 75440651  | Chic2    |
| chr5 | 75040638  | 75600276  | chr5 | 75506345  | 75543132  | Gm19583  |
| chr5 | 75040638  | 75600276  | chr5 | 75548315  | 75594229  | Pdgfra   |
| chr5 | 106211005 | 106330784 | chr5 | 106305586 | 106344837 | Zfp326   |
| chr5 | 106211005 | 106330784 | chr5 | 106128987 | 106244234 | Lrrc8d   |
| chr5 | 107433984 | 107756425 | chr5 | 107535588 | 107718614 | Tgfb3    |
| chr5 | 118778525 | 119199016 | chr5 | 119010727 | 119215446 | Med13l   |
| chr5 | 134931924 | 135298454 | chr5 | 135033123 | 135036041 | Syna     |
| chr5 | 134931924 | 135298454 | chr5 | 135047945 | 135047984 | Mir7228  |
| chr5 | 134931924 | 135298454 | chr5 | 135058559 | 135074198 | Rfc2     |
| chr5 | 134931924 | 135298454 | chr5 | 135075972 | 135090895 | Lat2     |
| chr5 | 134931924 | 135298454 | chr5 | 135095745 | 135115198 | Eif4h    |
| chr5 | 134931924 | 135298454 | chr5 | 135178465 | 135223124 | Eln      |
| chr5 | 134931924 | 135298454 | chr5 | 134833530 | 134932586 | Gtf2ird1 |
| chr5 | 134931924 | 135298454 | chr5 | 134965252 | 135028304 | Clip2    |
| chr5 | 134931924 | 135298454 | chr5 | 135131908 | 135164460 | Limk1    |
| chr5 | 149994056 | 150122997 | chr5 | 149996135 | 150027010 | Uspl1    |
| chr5 | 149994056 | 150122997 | chr5 | 150076633 | 150099623 | Alox5ap  |
| chr7 | 29585013  | 29808248  | chr7 | 29610356  | 29617258  | Ech1     |
| chr7 | 29585013  | 29808248  | chr7 | 29649404  | 29651303  | Lgals7   |
| chr7 | 29585013  | 29808248  | chr7 | 29756390  | 29766907  | Eif3k    |
| chr7 | 29585013  | 29808248  | chr7 | 29595908  | 29607285  | Hnrnp1   |
| chr7 | 29585013  | 29808248  | chr7 | 29666674  | 29678604  | Capn12   |
| chr7 | 29585013  | 29808248  | chr7 | 29678272  | 29747299  | Actn4    |
| chr7 | 29585013  | 29808248  | chr7 | 29767872  | 29788297  | Map4k1   |
| chr7 | 29585013  | 29808248  | chr7 | 29618812  | 29626722  | Lgals4   |
| chr7 | 29585013  | 29808248  | chr7 | 29619200  | 29626652  | Lgals6   |
| chr7 | 29585013  | 29808248  | chr7 | 29788358  | 29910170  | Ryr1     |

|      |           |           |      |           |           |               |
|------|-----------|-----------|------|-----------|-----------|---------------|
| chr7 | 73258728  | 73389168  | chr7 | 73254400  | 73318684  | Chsy1         |
| chr7 | 105323213 | 106517468 | chr7 | 105340924 | 105347985 | B3gnt6        |
| chr7 | 105323213 | 106517468 | chr7 | 105499177 | 105509838 | Tsku          |
| chr7 | 105323213 | 106517468 | chr7 | 105270074 | 105326703 | Capn5         |
| chr7 | 105323213 | 106517468 | chr7 | 105325703 | 105333309 | Gm16938       |
| chr7 | 105323213 | 106517468 | chr7 | 105588925 | 105625988 | Gucy2d        |
| chr7 | 105323213 | 106517468 | chr7 | 105851872 | 105866571 | Prkrir        |
| chr7 | 105323213 | 106517468 | chr7 | 105983621 | 106003257 | Wnt11         |
| chr7 | 105323213 | 106517468 | chr7 | 106302172 | 106331223 | Dgat2         |
| chr7 | 105323213 | 106517468 | chr7 | 106367593 | 106387121 | Mogat2        |
| chr7 | 105323213 | 106517468 | chr7 | 106408990 | 106415728 | LOC381967     |
| chr7 | 105323213 | 106517468 | chr7 | 106493884 | 106501749 | Serpinh1      |
| chr7 | 105323213 | 106517468 | chr7 | 105362169 | 105458037 | Acer3         |
| chr7 | 105323213 | 106517468 | chr7 | 105642731 | 105650340 | Lrrc32        |
| chr7 | 105323213 | 106517468 | chr7 | 105739115 | 105805079 | 2210018M11Rik |
| chr7 | 105323213 | 106517468 | chr7 | 106035252 | 106289654 | Uvrag         |
| chr7 | 105323213 | 106517468 | chr7 | 106415956 | 106485647 | Map6          |
| chr7 | 107283384 | 107825418 | chr7 | 107307786 | 107309441 | Lipt2         |
| chr7 | 107283384 | 107825418 | chr7 | 107685613 | 107688326 | Coa4          |
| chr7 | 107283384 | 107825418 | chr7 | 107325179 | 107333379 | Kcne3         |
| chr7 | 107283384 | 107825418 | chr7 | 107376116 | 107427382 | Pgm2l1        |
| chr7 | 107283384 | 107825418 | chr7 | 107413053 | 107414071 | Gpx2-ps1      |
| chr7 | 107283384 | 107825418 | chr7 | 107434029 | 107468209 | P4ha3         |
| chr7 | 107283384 | 107825418 | chr7 | 107621499 | 107634941 | Ucp3          |
| chr7 | 107283384 | 107825418 | chr7 | 107641853 | 107650682 | Ucp2          |
| chr7 | 107283384 | 107825418 | chr7 | 107651528 | 107663324 | Dnajb13       |
| chr7 | 107283384 | 107825418 | chr7 | 107756099 | 107789782 | Rab6a         |
| chr7 | 107283384 | 107825418 | chr7 | 107792409 | 107810908 | Plekhb1       |
| chr7 | 107283384 | 107825418 | chr7 | 107475246 | 107520406 | Ppme1         |
| chr7 | 107283384 | 107825418 | chr7 | 107520742 | 107618668 | C2cd3         |
| chr7 | 107283384 | 107825418 | chr7 | 107697630 | 107756510 | Mrpl48        |
| chr7 | 107995423 | 108157456 | chr7 | 108030819 | 108030923 | Mir3102       |
| chr7 | 107995423 | 108157456 | chr7 | 108018259 | 108080675 | Arhgef17      |
| chr7 | 107995423 | 108157456 | chr7 | 108086147 | 108112880 | P2ry6         |
| chr7 | 107995423 | 108157456 | chr7 | 108145085 | 108160505 | P2ry2         |
| chr7 | 107995423 | 108157456 | chr7 | 107994361 | 108011927 | Relt          |
| chr7 | 119236488 | 119489753 | chr7 | 119167019 | 119254900 | Usp47         |
| chr7 | 119236488 | 119489753 | chr7 | 119259532 | 119302571 | Dkk3          |
| chr7 | 119236488 | 119489753 | chr7 | 119369349 | 119498708 | Mical2        |
| chr7 | 119728710 | 119992162 | chr7 | 119571219 | 119735202 | Parva         |
| chr7 | 119728710 | 119992162 | chr7 | 119822833 | 120050319 | Tead1         |
| chr7 | 133730298 | 134040934 | chr7 | 133728521 | 133732606 | Apobr         |
| chr7 | 133730298 | 134040934 | chr7 | 133732808 | 133738424 | Il27          |
| chr7 | 133730298 | 134040934 | chr7 | 133766759 | 133768984 | Nupr1         |
| chr7 | 133730298 | 134040934 | chr7 | 133816383 | 133819871 | Sult1a1       |
| chr7 | 133730298 | 134040934 | chr7 | 133832440 | 133839297 | Slx1b         |
| chr7 | 133730298 | 134040934 | chr7 | 133839513 | 133840207 | Bola2         |

|      |           |           |      |           |           |               |
|------|-----------|-----------|------|-----------|-----------|---------------|
| chr7 | 133730298 | 134040934 | chr7 | 133843287 | 133848268 | Coro1a        |
| chr7 | 133730298 | 134040934 | chr7 | 133909927 | 133919159 | Gdpd3         |
| chr7 | 133730298 | 134040934 | chr7 | 133924996 | 133929062 | Tbx6          |
| chr7 | 133730298 | 134040934 | chr7 | 133929381 | 133935985 | Ppp4c         |
| chr7 | 133730298 | 134040934 | chr7 | 133973987 | 133975010 | 4930451111Rik |
| chr7 | 133730298 | 134040934 | chr7 | 133991066 | 133996219 | Doc2a         |
| chr7 | 133730298 | 134040934 | chr7 | 134005485 | 134008636 | Hirip3        |
| chr7 | 133730298 | 134040934 | chr7 | 133792822 | 133816293 | Ccdc101       |
| chr7 | 133730298 | 134040934 | chr7 | 133903139 | 133909330 | Mapk3         |
| chr7 | 133730298 | 134040934 | chr7 | 133920488 | 133924028 | Ypel3         |
| chr7 | 133730298 | 134040934 | chr7 | 133938747 | 133943961 | Aldoa         |
| chr7 | 133730298 | 134040934 | chr7 | 133960398 | 133973733 | Fam57b        |
| chr7 | 133730298 | 134040934 | chr7 | 133995946 | 134004977 | Ino80e        |
| chr7 | 133730298 | 134040934 | chr7 | 134009190 | 134028481 | Taok2         |
| chr7 | 133730298 | 134040934 | chr7 | 134029732 | 134041792 | Tmem219       |
| chr7 | 134514585 | 135069147 | chr7 | 134516050 | 134519564 | Zfp747        |
| chr7 | 134514585 | 135069147 | chr7 | 134534349 | 134537135 | E430018J23Rik |
| chr7 | 134514585 | 135069147 | chr7 | 134542429 | 134542514 | Mir684-1      |
| chr7 | 134514585 | 135069147 | chr7 | 134547181 | 134550336 | Zfp764        |
| chr7 | 134514585 | 135069147 | chr7 | 134562479 | 134565548 | Zfp688        |
| chr7 | 134514585 | 135069147 | chr7 | 134585649 | 134592672 | Zfp689        |
| chr7 | 134514585 | 135069147 | chr7 | 134615127 | 134620272 | Prr14         |
| chr7 | 134514585 | 135069147 | chr7 | 134628734 | 134635027 | Fbrs          |
| chr7 | 134514585 | 135069147 | chr7 | 134632764 | 134632901 | Mir7060       |
| chr7 | 134514585 | 135069147 | chr7 | 134653951 | 134656383 | 1700008J07Rik |
| chr7 | 134514585 | 135069147 | chr7 | 134671410 | 134671517 | Snora30       |
| chr7 | 134514585 | 135069147 | chr7 | 134725896 | 134732109 | Gm166         |
| chr7 | 134514585 | 135069147 | chr7 | 134747416 | 134747959 | 1700120K04Rik |
| chr7 | 134514585 | 135069147 | chr7 | 134750548 | 134757947 | Zfp629        |
| chr7 | 134514585 | 135069147 | chr7 | 134848491 | 134852280 | Bcl7c         |
| chr7 | 134514585 | 135069147 | chr7 | 134852000 | 134852076 | Mir762        |
| chr7 | 134514585 | 135069147 | chr7 | 134862473 | 134869130 | Ctf2          |
| chr7 | 134514585 | 135069147 | chr7 | 134913328 | 134918664 | Orai3         |
| chr7 | 134514585 | 135069147 | chr7 | 134944122 | 134947316 | Hsd3b7        |
| chr7 | 134514585 | 135069147 | chr7 | 135008872 | 135020337 | Zfp668        |
| chr7 | 134514585 | 135069147 | chr7 | 135021214 | 135029510 | Zfp646        |
| chr7 | 134514585 | 135069147 | chr7 | 135028957 | 135034484 | Prss53        |
| chr7 | 134514585 | 135069147 | chr7 | 135047586 | 135053178 | Bckdk         |
| chr7 | 134514585 | 135069147 | chr7 | 135056030 | 135069276 | Kat8          |
| chr7 | 134514585 | 135069147 | chr7 | 134525773 | 134530680 | 9130019O22Rik |
| chr7 | 134514585 | 135069147 | chr7 | 134716861 | 134726821 | Phkg2         |
| chr7 | 134514585 | 135069147 | chr7 | 134856249 | 134861699 | Ctf1          |
| chr7 | 134514585 | 135069147 | chr7 | 134890288 | 134912442 | Fbxl19        |
| chr7 | 134514585 | 135069147 | chr7 | 134920902 | 134943633 | Setd1a        |
| chr7 | 134514585 | 135069147 | chr7 | 134950357 | 134968045 | Stx1b         |
| chr7 | 134514585 | 135069147 | chr7 | 134985321 | 134992479 | Stx4a         |
| chr7 | 134514585 | 135069147 | chr7 | 135036576 | 135039131 | Vkorc1        |

|      |           |           |      |           |           |               |
|------|-----------|-----------|------|-----------|-----------|---------------|
| chr7 | 134514585 | 135069147 | chr7 | 134732211 | 134747119 | Rnf40         |
| chr7 | 135602229 | 135876830 | chr7 | 135583290 | 135605027 | Tial1         |
| chr7 | 135602229 | 135876830 | chr7 | 135667096 | 135690493 | Bag3          |
| chr7 | 135602229 | 135876830 | chr7 | 135839972 | 135883943 | Mcmbp         |
| chr7 | 135602229 | 135876830 | chr7 | 135754878 | 135839950 | Inpp5f        |
| chr7 | 136883914 | 137382760 | chr7 | 137105678 | 137122183 | Gm4265        |
| chr7 | 136883914 | 137382760 | chr7 | 137305964 | 137410322 | Fgfr2         |
| chr7 | 137512633 | 137624707 | chr7 | 137535007 | 137663883 | Ate1          |
| chr7 | 139923751 | 140056738 | chr7 | 140019143 | 140044330 | Mettl10       |
| chr7 | 139923751 | 140056738 | chr7 | 140050907 | 140076797 | Fam175b       |
| chr7 | 139923751 | 140056738 | chr7 | 139903766 | 140004879 | Fam53b        |
| chr7 | 140193444 | 140299601 | chr7 | 140178693 | 140315166 | Ctbp2         |
| chr7 | 150559434 | 150831580 | chr7 | 150644243 | 150646955 | Cdkn1c        |
| chr7 | 150559434 | 150831580 | chr7 | 150687452 | 150688429 | Phlda2        |
| chr7 | 150559434 | 150831580 | chr7 | 150756575 | 150756664 | Mir7064       |
| chr7 | 150559434 | 150831580 | chr7 | 150659659 | 150685237 | Slc22a18      |
| chr7 | 150559434 | 150831580 | chr7 | 150743134 | 150785995 | Cars          |
| chr7 | 150559434 | 150831580 | chr7 | 150793589 | 150813750 | Tnfrsf26      |
| chr7 | 150559434 | 150831580 | chr7 | 150822629 | 150835543 | Tnfrsf22      |
| chr7 | 150559434 | 150831580 | chr7 | 150293158 | 150612947 | Kcnq1         |
| chr7 | 150559434 | 150831580 | chr7 | 150699483 | 150735025 | Nap1l4        |
| chr8 | 13445913  | 13724272  | chr8 | 13550721  | 13562461  | 1700029H14Rik |
| chr8 | 13445913  | 13724272  | chr8 | 13435458  | 13461451  | Tmem255b      |
| chr8 | 13445913  | 13724272  | chr8 | 13465373  | 13494535  | Gas6          |
| chr8 | 13445913  | 13724272  | chr8 | 13705888  | 13743066  | 4932443I19Rik |
| chr8 | 13445913  | 13724272  | chr8 | 13567217  | 13677587  | Rasa3         |
| chr8 | 86949624  | 87372494  | chr8 | 87185229  | 87186751  | Ier2          |
| chr8 | 86949624  | 87372494  | chr8 | 87213145  | 87223707  | Trmt1         |
| chr8 | 86949624  | 87372494  | chr8 | 87356180  | 87359381  | Gadd45gip1    |
| chr8 | 86949624  | 87372494  | chr8 | 87365986  | 87370830  | Calr          |
| chr8 | 86949624  | 87372494  | chr8 | 87194377  | 87211761  | Nacc1         |
| chr8 | 86949624  | 87372494  | chr8 | 87225355  | 87228615  | Lyl1          |
| chr8 | 86949624  | 87372494  | chr8 | 87339303  | 87356164  | Dand5         |
| chr8 | 86949624  | 87372494  | chr8 | 87358550  | 87364540  | Rad23a        |
| chr8 | 86949624  | 87372494  | chr8 | 87228610  | 87324237  | Nfix          |
| chr8 | 86949624  | 87372494  | chr8 | 86939262  | 87164148  | Cacna1a       |
| chr8 | 89128418  | 89453194  | chr8 | 89269597  | 89270959  | Gm10638       |
| chr8 | 89128418  | 89453194  | chr8 | 89147941  | 89240535  | Lonp2         |
| chr8 | 89128418  | 89453194  | chr8 | 89247836  | 89269905  | Siah1a        |
| chr8 | 89128418  | 89453194  | chr8 | 89365037  | 89409157  | N4bp1         |
| chr8 | 113352799 | 113614457 | chr8 | 113362434 | 113362498 | Snord111      |
| chr8 | 113352799 | 113614457 | chr8 | 113540349 | 113540430 | Mir3473d      |
| chr8 | 113352799 | 113614457 | chr8 | 113580238 | 113581564 | Exosc6        |
| chr8 | 113352799 | 113614457 | chr8 | 113593396 | 113605608 | Clec18a       |
| chr8 | 113352799 | 113614457 | chr8 | 113334391 | 113370703 | Sf3b3         |
| chr8 | 113352799 | 113614457 | chr8 | 113406355 | 113426388 | Fuk           |
| chr8 | 113352799 | 113614457 | chr8 | 113443764 | 113496397 | St3gal2       |



|      |           |           |      |           |           |               |
|------|-----------|-----------|------|-----------|-----------|---------------|
| chr8 | 113352799 | 113614457 | chr8 | 113527085 | 113555651 | Ddx19b        |
| chr8 | 113352799 | 113614457 | chr8 | 113557741 | 113579469 | Aars          |
| chr8 | 113352799 | 113614457 | chr8 | 113370923 | 113406134 | Cog4          |
| chr8 | 113352799 | 113614457 | chr8 | 113498890 | 113521723 | Ddx19a        |
| chr8 | 120726520 | 120908256 | chr8 | 120807654 | 121847348 | Cdh13         |
| chr8 | 120979818 | 121422492 | chr8 | 120807654 | 121847348 | Cdh13         |
| chr9 | 54267633  | 54683627  | chr9 | 54386790  | 54392827  | Sh2d7         |
| chr9 | 54267633  | 54683627  | chr9 | 54556119  | 54556188  | Mir5710       |
| chr9 | 54267633  | 54683627  | chr9 | 54612554  | 54620917  | Crabp1        |
| chr9 | 54267633  | 54683627  | chr9 | 54434317  | 54452469  | Idh3a         |
| chr9 | 54267633  | 54683627  | chr9 | 54452803  | 54509692  | Acsbg1        |
| chr9 | 54267633  | 54683627  | chr9 | 54547365  | 54564124  | Dnaja4        |
| chr9 | 54267633  | 54683627  | chr9 | 54564959  | 54582356  | Wdr61         |
| chr9 | 54267633  | 54683627  | chr9 | 54212964  | 54349433  | Dmxl2         |
| chr9 | 54267633  | 54683627  | chr9 | 54393158  | 54407886  | Cib2          |
| chr9 | 56107128  | 56298276  | chr9 | 56266652  | 56344743  | Hmg20a        |
| chr9 | 56107128  | 56298276  | chr9 | 56048935  | 56265857  | Peak1         |
| chr9 | 56724267  | 57459171  | chr9 | 56785306  | 56786205  | Imp3          |
| chr9 | 56724267  | 57459171  | chr9 | 56977788  | 56979097  | Man2c1os      |
| chr9 | 56724267  | 57459171  | chr9 | 56991062  | 56994841  | Neil1         |
| chr9 | 56724267  | 57459171  | chr9 | 57002847  | 57006106  | Commd4        |
| chr9 | 56724267  | 57459171  | chr9 | 57084362  | 57097671  | Trcg1         |
| chr9 | 56724267  | 57459171  | chr9 | 57100128  | 57110406  | 1700017B05Rik |
| chr9 | 56724267  | 57459171  | chr9 | 57351908  | 57353254  | Rpp25         |
| chr9 | 56724267  | 57459171  | chr9 | 57385334  | 57390994  | Fam219b       |
| chr9 | 56724267  | 57459171  | chr9 | 57447798  | 57454088  | Cplx3         |
| chr9 | 56724267  | 57459171  | chr9 | 56712910  | 56747677  | Cspg4         |
| chr9 | 56724267  | 57459171  | chr9 | 56765006  | 56776178  | Snx33         |
| chr9 | 56724267  | 57459171  | chr9 | 56798730  | 56831006  | Snupn         |
| chr9 | 56724267  | 57459171  | chr9 | 56904703  | 56919773  | Gm10658       |
| chr9 | 56724267  | 57459171  | chr9 | 56919846  | 56976175  | Sin3a         |
| chr9 | 56724267  | 57459171  | chr9 | 56978583  | 56990017  | Man2c1        |
| chr9 | 56724267  | 57459171  | chr9 | 57023081  | 57033915  | 1700041C23Rik |
| chr9 | 56724267  | 57459171  | chr9 | 57238876  | 57248171  | 4930430J02Rik |
| chr9 | 56724267  | 57459171  | chr9 | 57289133  | 57315831  | Scamp5        |
| chr9 | 56724267  | 57459171  | chr9 | 57369038  | 57380233  | Cox5a         |
| chr9 | 56724267  | 57459171  | chr9 | 57392074  | 57400559  | Mpi           |
| chr9 | 56724267  | 57459171  | chr9 | 57437258  | 57444040  | Ulk3          |
| chr9 | 56724267  | 57459171  | chr9 | 57454839  | 57468581  | Lman1l        |
| chr9 | 56724267  | 57459171  | chr9 | 56842774  | 56910614  | Ptpn9         |
| chr9 | 56724267  | 57459171  | chr9 | 57260470  | 57287921  | Ppcdc         |
| chr9 | 56724267  | 57459171  | chr9 | 57408750  | 57436605  | Scamp2        |
| chr9 | 64673418  | 64853161  | chr9 | 64770667  | 64799414  | Slc24a1       |
| chr9 | 64673418  | 64853161  | chr9 | 64808638  | 64834788  | Vwa9          |
| chr9 | 64673418  | 64853161  | chr9 | 64834789  | 64869524  | Ptplad1       |
| chr9 | 64673418  | 64853161  | chr9 | 64658817  | 64767474  | Dennd4a       |
| chr9 | 67219452  | 67377314  | chr9 | 67064891  | 67407510  | Tln2          |

|      |           |           |      |           |           |               |
|------|-----------|-----------|------|-----------|-----------|---------------|
| chr9 | 122116798 | 122533106 | chr9 | 122183007 | 122183146 | Mir8106       |
| chr9 | 122116798 | 122533106 | chr9 | 122291139 | 122307919 | A730085K08Rik |
| chr9 | 122116798 | 122533106 | chr9 | 122481618 | 122489765 | 9530059O14Rik |
| chr9 | 122116798 | 122533106 | chr9 | 122084991 | 122203541 | Ano10         |
| chr9 | 122116798 | 122533106 | chr9 | 122260733 | 122290641 | Abhd5         |
| chrX | 70580344  | 70757796  | chrX | 70587958  | 70604419  | Zfp275        |
| chrX | 70580344  | 70757796  | chrX | 70656441  | 70672326  | Zfp92         |
| chrX | 70580344  | 70757796  | chrX | 70679043  | 70680682  | Trex2         |
| chrX | 70580344  | 70757796  | chrX | 70682653  | 70704368  | Haus7         |
| chrX | 70580344  | 70757796  | chrX | 70728973  | 70741275  | Bgn           |
| chrX | 70580344  | 70757796  | chrX | 70748424  | 70816344  | Atp2b3        |
| chrX | 136979065 | 137162153 | chrX | 136991141 | 137010679 | Prps1         |
| chrX | 136979065 | 137162153 | chrX | 137074067 | 137135061 | Tsc22d3       |
| chrX | 166202417 | 166420091 | chrX | 166412974 | 166416849 | G530011O06Rik |
| chrX | 166202417 | 166420091 | chrX | 166214309 | 166217567 | 4933400A11Rik |
| chrX | 166202417 | 166420091 | chrX | 166123178 | 166428729 | Mid1          |
| chrX | 166202417 | 166420091 | chrX | 166317553 | 166428729 | Mid1          |

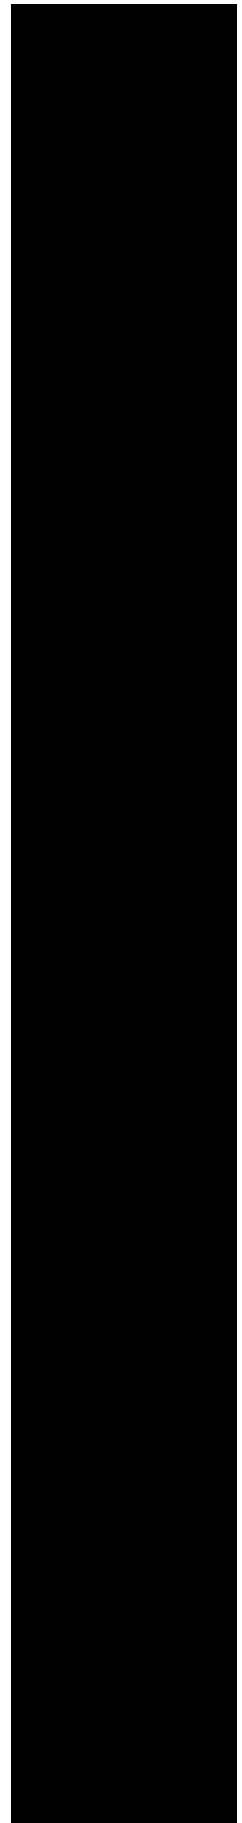

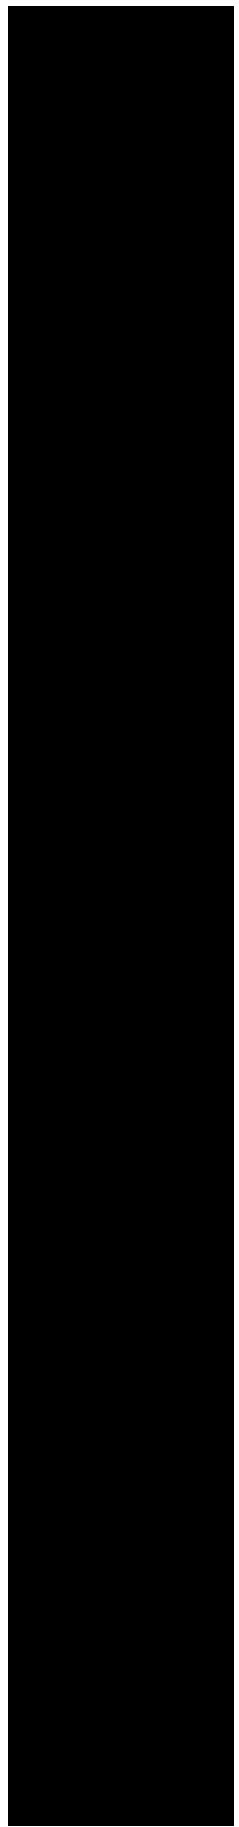



































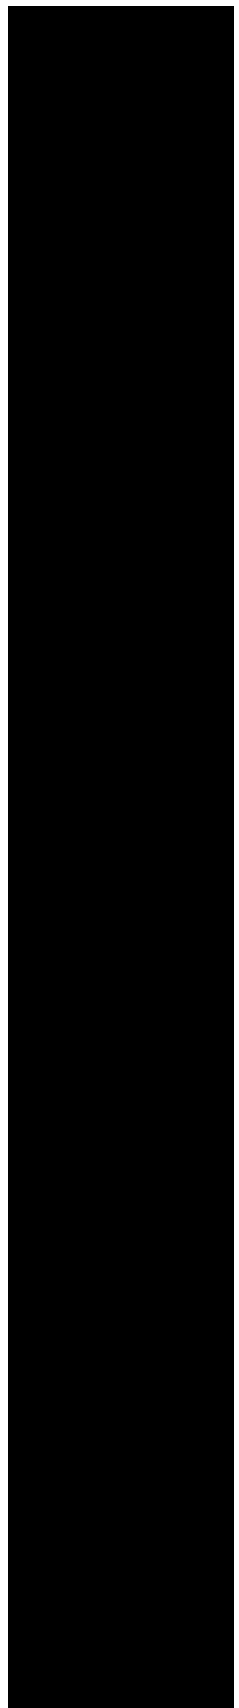

Cluster3 **Transient Day 2**

**Adipogenic genes**

|       |           |           |       |           |           |         |
|-------|-----------|-----------|-------|-----------|-----------|---------|
| chr1  | 194430844 | 195129881 | chr1  | 195128187 | 195170072 | Lamb3   |
| chr12 | 85726264  | 85839852  | chr12 | 85771667  | 85791900  | Aldh6a1 |
| chr14 | 29207533  | 29360242  | chr14 | 29318658  | 29338701  | Wnt5a   |
| chr7  | 35803644  | 36006056  | chr7  | 35904311  | 35906951  | Cebpa   |

**All genes**

|      |          |          |      |          |          |               |
|------|----------|----------|------|----------|----------|---------------|
| chr1 | 71883715 | 72030113 | chr1 | 71934685 | 71937778 | Gm8883        |
| chr1 | 71883715 | 72030113 | chr1 | 72005571 | 72051769 | 4933417E11Rik |
| chr1 | 89555389 | 90443191 | chr1 | 89681145 | 89681393 | Scarna6       |
| chr1 | 89555389 | 90443191 | chr1 | 90101306 | 90102323 | Dnajb3        |
| chr1 | 89555389 | 90443191 | chr1 | 90161402 | 90174132 | A730008H23Rik |
| chr1 | 89555389 | 90443191 | chr1 | 90396445 | 90406641 | Glrp1         |
| chr1 | 89555389 | 90443191 | chr1 | 89700254 | 89741732 | Sag           |
| chr1 | 89555389 | 90443191 | chr1 | 89841695 | 89905126 | Usp40         |
| chr1 | 89555389 | 90443191 | chr1 | 90062586 | 90116577 | Ugt1a5        |
| chr1 | 89555389 | 90443191 | chr1 | 90097185 | 90116577 | Ugt1a2        |
| chr1 | 89555389 | 90443191 | chr1 | 90108533 | 90116577 | Ugt1a1        |
| chr1 | 89555389 | 90443191 | chr1 | 90123594 | 90158864 | Mroh2a        |
| chr1 | 89555389 | 90443191 | chr1 | 90155430 | 90174154 | Hjurp         |
| chr1 | 89555389 | 90443191 | chr1 | 90159687 | 90165983 | 6430706D22Rik |
| chr1 | 89555389 | 90443191 | chr1 | 90203286 | 90285426 | Trpm8         |
| chr1 | 89555389 | 90443191 | chr1 | 89516886 | 89617083 | Inpp5d        |
| chr1 | 89555389 | 90443191 | chr1 | 89652585 | 89689003 | Atg16l1       |
| chr1 | 89555389 | 90443191 | chr1 | 89749861 | 89841064 | Dgkd          |
| chr1 | 89555389 | 90443191 | chr1 | 89951985 | 90116577 | Ugt1a10       |
| chr1 | 89555389 | 90443191 | chr1 | 89967353 | 90116577 | Ugt1a9        |
| chr1 | 89555389 | 90443191 | chr1 | 89991575 | 90116577 | Ugt1a7c       |
| chr1 | 89555389 | 90443191 | chr1 | 89999831 | 90115573 | Ugt1a6b       |
| chr1 | 89555389 | 90443191 | chr1 | 90031383 | 90116577 | Ugt1a6a       |

|       |           |           |       |           |           |               |
|-------|-----------|-----------|-------|-----------|-----------|---------------|
| chr1  | 89555389  | 90443191  | chr1  | 90303593  | 90323013  | Spp2          |
| chr1  | 90458408  | 90632662  | chr1  | 90594800  | 90598766  | Arl4c         |
| chr1  | 90458408  | 90632662  | chr1  | 90448091  | 90458741  | Gm19589       |
| chr1  | 91276516  | 91524780  | chr1  | 91256916  | 91302708  | C030007H22Rik |
| chr1  | 91276516  | 91524780  | chr1  | 91351385  | 91791857  | Agap1         |
| chr1  | 155428758 | 155568363 | chr1  | 155500166 | 155544795 | Rgs8          |
| chr1  | 158639339 | 158866916 | chr1  | 158608701 | 158649041 | Fam20b        |
| chr1  | 158639339 | 158866916 | chr1  | 158769153 | 158791209 | Angptl1       |
| chr1  | 158639339 | 158866916 | chr1  | 158734296 | 158869757 | Ralgps2       |
| chr1  | 161581487 | 161718650 | chr1  | 161453899 | 161855053 | Tnr           |
| chr1  | 164500070 | 164888273 | chr1  | 164577373 | 164588350 | 7420461P10Rik |
| chr1  | 164500070 | 164888273 | chr1  | 164500958 | 164529209 | Vamp4         |
| chr1  | 164500070 | 164888273 | chr1  | 164569280 | 164579825 | Myoc          |
| chr1  | 164500070 | 164888273 | chr1  | 164724013 | 164742680 | Fmo4          |
| chr1  | 164500070 | 164888273 | chr1  | 164759691 | 164796679 | Fmo1          |
| chr1  | 164500070 | 164888273 | chr1  | 164805177 | 164828843 | Fmo2          |
| chr1  | 164500070 | 164888273 | chr1  | 164846681 | 164867356 | Fmo6          |
| chr1  | 164500070 | 164888273 | chr1  | 164883930 | 164914622 | Fmo3          |
| chr1  | 164500070 | 164888273 | chr1  | 164601915 | 164670687 | Prrc2c        |
| chr1  | 181697962 | 182089314 | chr1  | 181675034 | 181734146 | Ahctf1        |
| chr1  | 181697962 | 182089314 | chr1  | 181891219 | 182095733 | Cdc42bpa      |
| chr1  | 186173131 | 186546259 | chr1  | 186536375 | 186542868 | 4930488B22Rik |
| chr1  | 186173131 | 186546259 | chr1  | 186351719 | 186381570 | 1700112H15Rik |
| chr1  | 193378676 | 193917908 | chr1  | 193645351 | 193656928 | Nek2          |
| chr1  | 193378676 | 193917908 | chr1  | 193730659 | 193737126 | Slc30a1       |
| chr1  | 193378676 | 193917908 | chr1  | 193822434 | 193822515 | Mir3473c      |
| chr1  | 193378676 | 193917908 | chr1  | 193361243 | 193399413 | Dtl           |
| chr1  | 193378676 | 193917908 | chr1  | 193399612 | 193445570 | Ints7         |
| chr1  | 193378676 | 193917908 | chr1  | 193801253 | 193812163 | Rd3           |
| chr1  | 193378676 | 193917908 | chr1  | 193541902 | 193608134 | Lpgat1        |
| chr1  | 193378676 | 193917908 | chr1  | 193717950 | 193731406 | 1700034H15Rik |
| chr1  | 193378676 | 193917908 | chr1  | 193821083 | 193916480 | Traf5         |
| chr1  | 194430844 | 195129881 | chr1  | 194667898 | 194668933 | 1700065J18Rik |
| chr1  | 194430844 | 195129881 | chr1  | 195098353 | 195099382 | G0s2          |
| chr1  | 194430844 | 195129881 | chr1  | 194670681 | 194681946 | Sertad4       |
| chr1  | 194430844 | 195129881 | chr1  | 194930596 | 194956445 | Diexf         |
| chr1  | 194430844 | 195129881 | chr1  | 194979305 | 194998229 | Irf6          |
| chr1  | 194430844 | 195129881 | chr1  | 194999662 | 195004026 | A130010J15Rik |
| chr1  | 194430844 | 195129881 | chr1  | 195001697 | 195027740 | Traf3ip3      |
| chr1  | 194430844 | 195129881 | chr1  | 195047834 | 195090239 | Hsd11b1       |
| chr1  | 194430844 | 195129881 | chr1  | 194336709 | 194597413 | Hhat          |
| chr1  | 194430844 | 195129881 | chr1  | 194723500 | 194861892 | Syt14         |
| chr1  | 194430844 | 195129881 | chr1  | 195128187 | 195170072 | Lamb3         |
| chr10 | 59334220  | 59490073  | chr10 | 59412422  | 59414518  | Ddit4         |
| chr10 | 59334220  | 59490073  | chr10 | 59342338  | 59360764  | Dnajb12       |
| chr10 | 59334220  | 59490073  | chr10 | 59450656  | 59465860  | Anapc16       |
| chr10 | 59334220  | 59490073  | chr10 | 59465552  | 59562738  | Ascc1         |

|       |          |          |       |          |          |                |
|-------|----------|----------|-------|----------|----------|----------------|
| chr10 | 76490265 | 77065595 | chr10 | 76720517 | 76721968 | Gm10941        |
| chr10 | 76490265 | 77065595 | chr10 | 76881120 | 76883684 | Gm17769        |
| chr10 | 76490265 | 77065595 | chr10 | 76495483 | 76513177 | Slc19a1        |
| chr10 | 76490265 | 77065595 | chr10 | 76722044 | 76732331 | Pofut2         |
| chr10 | 76490265 | 77065595 | chr10 | 76949399 | 76978558 | Fam207a        |
| chr10 | 76490265 | 77065595 | chr10 | 76993092 | 77028419 | Itgb2          |
| chr10 | 76490265 | 77065595 | chr10 | 77044511 | 77061477 | Pttg1ip        |
| chr10 | 76490265 | 77065595 | chr10 | 76753471 | 76881018 | Adarb1         |
| chr10 | 76490265 | 77065595 | chr10 | 76514923 | 76629275 | Col18a1        |
| chr10 | 77723296 | 77847507 | chr10 | 77802894 | 77802952 | Mir7659        |
| chr10 | 77723296 | 77847507 | chr10 | 77734307 | 77814445 | Agpat3         |
| chr11 | 69504486 | 69615557 | chr11 | 69573386 | 69575346 | Slc35g3        |
| chr11 | 69504486 | 69615557 | chr11 | 69611703 | 69615127 | Fgf11          |
| chr11 | 69504486 | 69615557 | chr11 | 69496078 | 69509600 | Tnfsf12Tnfsf13 |
| chr11 | 69504486 | 69615557 | chr11 | 69499741 | 69509600 | Tnfsf12        |
| chr11 | 69504486 | 69615557 | chr11 | 69547911 | 69571725 | Polr2a         |
| chr11 | 69504486 | 69615557 | chr11 | 69579413 | 69597528 | Zbtb4          |
| chr11 | 69504486 | 69615557 | chr11 | 69597537 | 69609439 | Chrnbl         |
| chr11 | 98537206 | 98717711 | chr11 | 98562626 | 98564943 | Csf3           |
| chr11 | 98537206 | 98717711 | chr11 | 98525664 | 98539022 | Gsdma          |
| chr11 | 98537206 | 98717711 | chr11 | 98543867 | 98557292 | Psmd3          |
| chr11 | 98537206 | 98717711 | chr11 | 98603186 | 98626425 | Thra           |
| chr11 | 98537206 | 98717711 | chr11 | 98629248 | 98636556 | Nr1d1          |
| chr11 | 98537206 | 98717711 | chr11 | 98657082 | 98669173 | Msl1           |
| chr11 | 98537206 | 98717711 | chr11 | 98659622 | 98671403 | Gm12359        |
| chr11 | 98537206 | 98717711 | chr11 | 98671121 | 98695121 | Casc3          |
| chr11 | 98537206 | 98717711 | chr11 | 98698098 | 98714319 | Rapgef1        |
| chr11 | 98537206 | 98717711 | chr11 | 98565904 | 98590749 | Med24          |
| chr11 | 99849882 | 99973707 | chr11 | 99854545 | 99855308 | Krtap17-1      |
| chr11 | 99849882 | 99973707 | chr11 | 99884947 | 99891182 | Krt33b         |
| chr11 | 99849882 | 99973707 | chr11 | 99898664 | 99902868 | Krt34          |
| chr11 | 99849882 | 99973707 | chr11 | 99953505 | 99957538 | Krt35          |
| chr11 | 99849882 | 99973707 | chr11 | 99963326 | 99966940 | Krt36          |
| chr11 | 99849882 | 99973707 | chr11 | 99907959 | 99911865 | Krt31          |
| chr11 | 99849882 | 99973707 | chr11 | 99942161 | 99949540 | Krt32          |
| chr11 | 99849882 | 99973707 | chr11 | 99872512 | 99877526 | Krt33a         |
| chr12 | 4090117  | 4573968  | chr12 | 4234026  | 4240123  | Ptrhd1         |
| chr12 | 4090117  | 4573968  | chr12 | 4082573  | 4110612  | Dnajc27        |
| chr12 | 4090117  | 4573968  | chr12 | 4211671  | 4234294  | Cenpo          |
| chr12 | 4090117  | 4573968  | chr12 | 4247361  | 4484060  | Ncoa1          |
| chr12 | 4090117  | 4573968  | chr12 | 4133396  | 4213524  | Adcy3          |
| chr12 | 10225666 | 10405736 | chr12 | 10397585 | 10402368 | Rdh14          |
| chr12 | 10225666 | 10405736 | chr12 | 10376776 | 10396980 | Nt5c1b         |
| chr12 | 33387193 | 33561336 | chr12 | 33508980 | 33511773 | Gdap10         |
| chr12 | 33387193 | 33561336 | chr12 | 33505199 | 33538234 | Nampt          |
| chr12 | 53043450 | 53272026 | chr12 | 53123990 | 53129050 | Gpr33          |
| chr12 | 53043450 | 53272026 | chr12 | 52976859 | 53072308 | Heatr5a        |

|       |          |          |       |          |          |               |
|-------|----------|----------|-------|----------|----------|---------------|
| chr12 | 53043450 | 53272026 | chr12 | 53098493 | 53107488 | Dtd2          |
| chr12 | 53043450 | 53272026 | chr12 | 53198732 | 53411946 | Nubpl         |
| chr12 | 70949217 | 71255378 | chr12 | 70944672 | 70954658 | 4931403G20Rik |
| chr12 | 70949217 | 71255378 | chr12 | 71064395 | 71070731 | Gm3086        |
| chr12 | 70949217 | 71255378 | chr12 | 71065998 | 71087989 | Sav1          |
| chr12 | 70949217 | 71255378 | chr12 | 71255157 | 71284193 | Abhd12b       |
| chr12 | 70949217 | 71255378 | chr12 | 70904743 | 70994150 | Map4k5        |
| chr12 | 70949217 | 71255378 | chr12 | 70994091 | 71065072 | Atl1          |
| chr12 | 70949217 | 71255378 | chr12 | 71112421 | 71213022 | Nin           |
| chr12 | 74106674 | 74643116 | chr12 | 74142813 | 74147699 | Six1          |
| chr12 | 74106674 | 74643116 | chr12 | 74201245 | 74214232 | Six4          |
| chr12 | 74106674 | 74643116 | chr12 | 74381396 | 74387698 | Trmt5         |
| chr12 | 74106674 | 74643116 | chr12 | 74465061 | 74510550 | D830013O20Rik |
| chr12 | 74106674 | 74643116 | chr12 | 74224703 | 74374975 | Mnat1         |
| chr12 | 74106674 | 74643116 | chr12 | 74387834 | 74455032 | Slc38a6       |
| chr12 | 76898556 | 77037640 | chr12 | 77010089 | 77010172 | Mir5101       |
| chr12 | 76898556 | 77037640 | chr12 | 76919304 | 77211915 | Syne2         |
| chr12 | 84867305 | 85007570 | chr12 | 84861415 | 84882942 | Dcaf4         |
| chr12 | 84867305 | 85007570 | chr12 | 84973183 | 85024073 | Rbm25         |
| chr12 | 84867305 | 85007570 | chr12 | 84887890 | 84938097 | Zfyve1        |
| chr12 | 85726264 | 85839852 | chr12 | 85758149 | 85759528 | Rnf113a2      |
| chr12 | 85726264 | 85839852 | chr12 | 85750017 | 85774730 | Ccdc176       |
| chr12 | 85726264 | 85839852 | chr12 | 85771667 | 85791900 | Aldh6a1       |
| chr12 | 85726264 | 85839852 | chr12 | 85714825 | 85749979 | Entpd5        |
| chr12 | 85726264 | 85839852 | chr12 | 85792457 | 85872483 | Lin52         |
| chr12 | 86143158 | 86651312 | chr12 | 86216751 | 86220705 | D030025P21Rik |
| chr12 | 86143158 | 86651312 | chr12 | 86311879 | 86324253 | Fcf1          |
| chr12 | 86143158 | 86651312 | chr12 | 86507588 | 86518263 | Pgf           |
| chr12 | 86143158 | 86651312 | chr12 | 86560462 | 86567578 | Eif2b2        |
| chr12 | 86143158 | 86651312 | chr12 | 86586872 | 86586935 | Mir6938       |
| chr12 | 86143158 | 86651312 | chr12 | 86613347 | 86621385 | Acyp1         |
| chr12 | 86143158 | 86651312 | chr12 | 86124161 | 86217445 | Ltbp2         |
| chr12 | 86143158 | 86651312 | chr12 | 86259098 | 86311836 | Arel1         |
| chr12 | 86143158 | 86651312 | chr12 | 86427763 | 86447381 | Prox2         |
| chr12 | 86143158 | 86651312 | chr12 | 86451782 | 86475041 | Dlst          |
| chr12 | 86143158 | 86651312 | chr12 | 86476545 | 86492214 | Rps6kl1       |
| chr12 | 86143158 | 86651312 | chr12 | 86575469 | 86611514 | Mlh3          |
| chr12 | 86143158 | 86651312 | chr12 | 86640463 | 86680312 | Nek9          |
| chr12 | 86143158 | 86651312 | chr12 | 86337270 | 86411465 | Ylpm1         |
| chr12 | 86143158 | 86651312 | chr12 | 86629540 | 86640308 | Zc2hc1c       |
| chr12 | 88121189 | 88283854 | chr12 | 88221652 | 88225764 | Irf2bpl       |
| chr13 | 26009255 | 26138753 | chr13 | 26012902 | 26058185 | Gm11351       |
| chr13 | 28807040 | 29105499 | chr13 | 29042598 | 29045551 | Sox4          |
| chr13 | 28807040 | 29105499 | chr13 | 28551902 | 28977291 | 2610307P16Rik |
| chr13 | 44773957 | 44883847 | chr13 | 44826142 | 45017012 | Jarid2        |
| chr13 | 46057845 | 46213164 | chr13 | 45645124 | 46060360 | Atxn1         |
| chr13 | 49472151 | 49631539 | chr13 | 49436917 | 49482395 | Bicd2         |

|       |           |           |       |           |           |               |
|-------|-----------|-----------|-------|-----------|-----------|---------------|
| chr13 | 49472151  | 49631539  | chr13 | 49600178  | 49628158  | Ecm2          |
| chr13 | 49472151  | 49631539  | chr13 | 49516591  | 49558429  | Ippk          |
| chr13 | 49472151  | 49631539  | chr13 | 49559427  | 49748100  | Cenpp         |
| chr13 | 52101323  | 52335944  | chr13 | 52192109  | 52219529  | 4921525009Rik |
| chr13 | 110373115 | 110554060 | chr13 | 109444370 | 110746177 | Pde4d         |
| chr14 | 21849139  | 22179881  | chr14 | 21852963  | 21871664  | Ap3m1         |
| chr14 | 21849139  | 22179881  | chr14 | 21748654  | 21852895  | Vcl           |
| chr14 | 21849139  | 22179881  | chr14 | 21871795  | 22267791  | Adk           |
| chr14 | 26481352  | 26605349  | chr14 | 26513655  | 26519952  | Ppif          |
| chr14 | 26481352  | 26605349  | chr14 | 26515841  | 26520768  | Ppifos        |
| chr14 | 26481352  | 26605349  | chr14 | 26531125  | 26588342  | Zcchc24       |
| chr14 | 26481352  | 26605349  | chr14 | 26278670  | 26486233  | Zmiz1         |
| chr14 | 29207533  | 29360242  | chr14 | 29318658  | 29338701  | Wnt5a         |
| chr14 | 29207533  | 29360242  | chr14 | 28435627  | 29291723  | Erc2          |
| chr14 | 31470225  | 31700243  | chr14 | 31692442  | 31694796  | Mustn1        |
| chr14 | 31470225  | 31700243  | chr14 | 31467560  | 31504499  | Rft1          |
| chr14 | 31470225  | 31700243  | chr14 | 31638779  | 31690396  | Tmem110       |
| chr14 | 31470225  | 31700243  | chr14 | 31699677  | 31715169  | Itih4         |
| chr14 | 31470225  | 31700243  | chr14 | 31528034  | 31635907  | Sfmbt1        |
| chr14 | 57450860  | 57563483  | chr14 | 57506631  | 57581416  | Zmym2         |
| chr14 | 65336139  | 65485165  | chr14 | 65271367  | 65425133  | Kif13b        |
| chr14 | 65336139  | 65485165  | chr14 | 65441054  | 65568684  | Hmbox1        |
| chr14 | 75617215  | 75717425  | chr14 | 75642093  | 75683360  | Cpb2          |
| chr14 | 75617215  | 75717425  | chr14 | 75684179  | 75744233  | Zc3h13        |
| chr14 | 75617215  | 75717425  | chr14 | 75530929  | 75630649  | Lcp1          |
| chr14 | 99472763  | 99601561  | chr14 | 99445595  | 99473326  | Bora          |
| chr14 | 99472763  | 99601561  | chr14 | 99475852  | 99498989  | Dis3          |
| chr14 | 99472763  | 99601561  | chr14 | 99498642  | 99653713  | Pibf1         |
| chr15 | 54602157  | 54845016  | chr15 | 54670233  | 54751701  | Enpp2         |
| chr15 | 56422570  | 56721805  | chr15 | 56497181  | 56526101  | Has2          |
| chr15 | 56422570  | 56721805  | chr15 | 56521498  | 56526015  | Has2os        |
| chr16 | 4847358   | 5129406   | chr16 | 4874778   | 4879851   | Ubald1        |
| chr16 | 4847358   | 5129406   | chr16 | 4935163   | 4939585   | Gm16861       |
| chr16 | 4847358   | 5129406   | chr16 | 4939110   | 4941025   | Nudt16l1      |
| chr16 | 4847358   | 5129406   | chr16 | 4964380   | 4979055   | 4930451G09Rik |
| chr16 | 4847358   | 5129406   | chr16 | 5007380   | 5008401   | Smim22        |
| chr16 | 4847358   | 5129406   | chr16 | 4886099   | 4938296   | Mgrn1         |
| chr16 | 4847358   | 5129406   | chr16 | 4941419   | 4964330   | Anks3         |
| chr16 | 4847358   | 5129406   | chr16 | 4986950   | 4997945   | Sep-12        |
| chr16 | 4847358   | 5129406   | chr16 | 5008821   | 5013646   | Rogdi         |
| chr16 | 4847358   | 5129406   | chr16 | 5013994   | 5050003   | Glyr1         |
| chr16 | 4847358   | 5129406   | chr16 | 5050160   | 5086378   | Ubn1          |
| chr16 | 4847358   | 5129406   | chr16 | 4835415   | 4867691   | 4930562C15Rik |
| chr16 | 4847358   | 5129406   | chr16 | 5086383   | 5132574   | Ppl           |
| chr16 | 26542497  | 26715929  | chr16 | 26581790  | 26725233  | Il1rap        |
| chr16 | 26542497  | 26715929  | chr16 | 26714767  | 26755588  | Gm20319       |
| chr16 | 34260699  | 34531258  | chr16 | 33969158  | 34514113  | Kalrn         |



|       |          |          |       |          |          |               |
|-------|----------|----------|-------|----------|----------|---------------|
| chr16 | 35907841 | 36017599 | chr16 | 35926600 | 35939113 | Dtx3l         |
| chr16 | 35907841 | 36017599 | chr16 | 35938555 | 35972707 | Parp9         |
| chr16 | 35907841 | 36017599 | chr16 | 35983448 | 36036248 | Kpna1         |
| chr16 | 37481537 | 37617754 | chr16 | 37509881 | 37539855 | Gtf2e1        |
| chr16 | 37481537 | 37617754 | chr16 | 37539979 | 37572471 | Rabl3         |
| chr16 | 37481537 | 37617754 | chr16 | 37580238 | 37632112 | Hgd           |
| chr16 | 87340409 | 87469508 | chr16 | 87433575 | 87440837 | Rwdd2b        |
| chr16 | 87340409 | 87469508 | chr16 | 87354429 | 87368894 | N6amt1        |
| chr16 | 87340409 | 87469508 | chr16 | 87455229 | 87483758 | Usp16         |
| chr16 | 87340409 | 87469508 | chr16 | 87376895 | 87432851 | Ltn1          |
| chr16 | 93495440 | 93808573 | chr16 | 93608081 | 93610594 | Cbr1          |
| chr16 | 93495440 | 93808573 | chr16 | 93683463 | 93691236 | Cbr3          |
| chr16 | 93495440 | 93808573 | chr16 | 93583705 | 93604060 | Setd4         |
| chr16 | 93495440 | 93808573 | chr16 | 93712151 | 93810833 | Dopey2        |
| chr16 | 94543966 | 94875975 | chr16 | 94550028 | 94558542 | Ripply3       |
| chr16 | 94543966 | 94875975 | chr16 | 94580369 | 94592622 | Pigp          |
| chr16 | 94543966 | 94875975 | chr16 | 94719330 | 94748236 | Dscr3         |
| chr16 | 94543966 | 94875975 | chr16 | 94592345 | 94690828 | Ttc3          |
| chr16 | 94543966 | 94875975 | chr16 | 94791812 | 94917126 | Dyrk1a        |
| chr16 | 95920556 | 96076664 | chr16 | 95924013 | 95942656 | Ets2          |
| chr16 | 95920556 | 96076664 | chr16 | 96052729 | 96150684 | 1600002D24Rik |
| chr17 | 24610447 | 25255003 | chr17 | 24610494 | 24616023 | Mlst8         |
| chr17 | 24610447 | 25255003 | chr17 | 24610828 | 24612414 | Bricd5        |
| chr17 | 24610447 | 25255003 | chr17 | 24665195 | 24665689 | Rab26os       |
| chr17 | 24610447 | 25255003 | chr17 | 24665998 | 24670692 | Rab26         |
| chr17 | 24610447 | 25255003 | chr17 | 24776226 | 24787250 | Slc9a3r2      |
| chr17 | 24610447 | 25255003 | chr17 | 24794274 | 24795370 | Npw           |
| chr17 | 24610447 | 25255003 | chr17 | 24806696 | 24818961 | Zfp598        |
| chr17 | 24610447 | 25255003 | chr17 | 24822036 | 24826894 | Syngn3        |
| chr17 | 24610447 | 25255003 | chr17 | 24830135 | 24833101 | Gfer          |
| chr17 | 24610447 | 25255003 | chr17 | 24833178 | 24837474 | Noxo1         |
| chr17 | 24610447 | 25255003 | chr17 | 24856475 | 24856910 | Snhg9         |
| chr17 | 24610447 | 25255003 | chr17 | 24856620 | 24856777 | Snora78       |
| chr17 | 24610447 | 25255003 | chr17 | 24857007 | 24858872 | Rps2          |
| chr17 | 24610447 | 25255003 | chr17 | 24857733 | 24857850 | Snora64       |
| chr17 | 24610447 | 25255003 | chr17 | 24859011 | 24861333 | Ndufb10       |
| chr17 | 24610447 | 25255003 | chr17 | 24873586 | 24879723 | Msrp1         |
| chr17 | 24610447 | 25255003 | chr17 | 24889947 | 24895629 | Hs3st6        |
| chr17 | 24610447 | 25255003 | chr17 | 24985840 | 24987247 | Fahd1         |
| chr17 | 24610447 | 25255003 | chr17 | 24987434 | 25001395 | Hagh          |
| chr17 | 24610447 | 25255003 | chr17 | 25019555 | 25023295 | Nubp2         |
| chr17 | 24610447 | 25255003 | chr17 | 25023618 | 25029092 | Spsb3         |
| chr17 | 24610447 | 25255003 | chr17 | 25029096 | 25032032 | Eme2          |
| chr17 | 24610447 | 25255003 | chr17 | 25032064 | 25033218 | Mrps34        |
| chr17 | 24610447 | 25255003 | chr17 | 25033444 | 25034474 | Nme3          |
| chr17 | 24610447 | 25255003 | chr17 | 24645794 | 24664883 | Traf7         |
| chr17 | 24610447 | 25255003 | chr17 | 24686894 | 24733459 | Pkd1          |

|       |          |          |       |          |          |               |
|-------|----------|----------|-------|----------|----------|---------------|
| chr17 | 24610447 | 25255003 | chr17 | 24732760 | 24769572 | Tsc2          |
| chr17 | 24610447 | 25255003 | chr17 | 24837597 | 24844598 | Tbl3          |
| chr17 | 24610447 | 25255003 | chr17 | 24852784 | 24855002 | Rnf151        |
| chr17 | 24610447 | 25255003 | chr17 | 24864773 | 24873094 | Rpl3l         |
| chr17 | 24610447 | 25255003 | chr17 | 24941326 | 24976732 | Meiob         |
| chr17 | 24610447 | 25255003 | chr17 | 25015714 | 25018953 | Igfals        |
| chr17 | 24610447 | 25255003 | chr17 | 25079414 | 25097568 | Hn1l          |
| chr17 | 24610447 | 25255003 | chr17 | 25098170 | 25152175 | Cramp1l       |
| chr17 | 24610447 | 25255003 | chr17 | 25194646 | 25218059 | Tmem204       |
| chr17 | 24610447 | 25255003 | chr17 | 25236513 | 25252912 | Telo2         |
| chr17 | 24610447 | 25255003 | chr17 | 24625727 | 24645852 | Caskin1       |
| chr17 | 24610447 | 25255003 | chr17 | 24769626 | 24775783 | Nthl1         |
| chr17 | 24610447 | 25255003 | chr17 | 25034450 | 25073922 | Mapk8ip3      |
| chr17 | 24610447 | 25255003 | chr17 | 25153030 | 25236442 | Ift140        |
| chr17 | 34624048 | 34832347 | chr17 | 34624350 | 34634374 | Btnl5-ps      |
| chr17 | 34624048 | 34832347 | chr17 | 34726750 | 34728699 | Gpsm3         |
| chr17 | 34624048 | 34832347 | chr17 | 34734794 | 34737882 | Ager          |
| chr17 | 34624048 | 34832347 | chr17 | 34738043 | 34740506 | Rnf5          |
| chr17 | 34624048 | 34832347 | chr17 | 34742805 | 34750394 | Agpat1        |
| chr17 | 34624048 | 34832347 | chr17 | 34753606 | 34764042 | Ppt2          |
| chr17 | 34624048 | 34832347 | chr17 | 34784090 | 34792019 | Atf6b         |
| chr17 | 34624048 | 34832347 | chr17 | 34644879 | 34654297 | Btnl6         |
| chr17 | 34624048 | 34832347 | chr17 | 34701239 | 34725488 | Notch4        |
| chr17 | 34624048 | 34832347 | chr17 | 34750294 | 34752916 | Egfl8         |
| chr17 | 34624048 | 34832347 | chr17 | 34766630 | 34769205 | Prrt1         |
| chr17 | 34624048 | 34832347 | chr17 | 34781827 | 34783272 | Fkbpl         |
| chr17 | 34624048 | 34832347 | chr17 | 34807479 | 34856760 | Tnxb          |
| chr17 | 34624048 | 34832347 | chr17 | 34729415 | 34734286 | Pbx2          |
| chr17 | 34862526 | 35421572 | chr17 | 34865325 | 34880842 | C4b           |
| chr17 | 34862526 | 35421572 | chr17 | 34938292 | 34941371 | Cyp21a1       |
| chr17 | 34862526 | 35421572 | chr17 | 34973963 | 34976131 | Dxo           |
| chr17 | 34862526 | 35421572 | chr17 | 34978753 | 34978816 | Mir6971       |
| chr17 | 34862526 | 35421572 | chr17 | 34982045 | 34982112 | Mir6970       |
| chr17 | 34862526 | 35421572 | chr17 | 34987335 | 34993317 | Nelfe         |
| chr17 | 34862526 | 35421572 | chr17 | 34994513 | 34994577 | Mir6972       |
| chr17 | 34862526 | 35421572 | chr17 | 35031503 | 35033789 | Zbtb12        |
| chr17 | 34862526 | 35421572 | chr17 | 35068197 | 35074242 | Neu1          |
| chr17 | 34862526 | 35421572 | chr17 | 35087180 | 35089416 | 1110038B12Rik |
| chr17 | 34862526 | 35421572 | chr17 | 35087894 | 35087953 | Snord52       |
| chr17 | 34862526 | 35421572 | chr17 | 35106303 | 35109101 | Hspa1a        |
| chr17 | 34862526 | 35421572 | chr17 | 35118798 | 35122838 | Lsm2          |
| chr17 | 34862526 | 35421572 | chr17 | 35162919 | 35164961 | Sapcd1        |
| chr17 | 34862526 | 35421572 | chr17 | 35195979 | 35199044 | Ddah2         |
| chr17 | 34862526 | 35421572 | chr17 | 35199637 | 35203129 | G6b           |
| chr17 | 34862526 | 35421572 | chr17 | 35201381 | 35202541 | G6bos         |
| chr17 | 34862526 | 35421572 | chr17 | 35204269 | 35206993 | Ly6g6c        |
| chr17 | 34862526 | 35421572 | chr17 | 35213886 | 35215749 | Ly6g6e        |

|       |          |          |       |          |          |               |
|-------|----------|----------|-------|----------|----------|---------------|
| chr17 | 34862526 | 35421572 | chr17 | 35217482 | 35222540 | Ly6g6f        |
| chr17 | 34862526 | 35421572 | chr17 | 35226235 | 35239932 | Abhd16a       |
| chr17 | 34862526 | 35421572 | chr17 | 35245244 | 35248898 | Ly6g5c        |
| chr17 | 34862526 | 35421572 | chr17 | 35250889 | 35252345 | Ly6g5b        |
| chr17 | 34862526 | 35421572 | chr17 | 35258440 | 35261760 | Gpank1        |
| chr17 | 34862526 | 35421572 | chr17 | 35263346 | 35265800 | D17H6S53E     |
| chr17 | 34862526 | 35421572 | chr17 | 35265941 | 35268697 | Apom          |
| chr17 | 34862526 | 35421572 | chr17 | 35307936 | 35312946 | Aif1          |
| chr17 | 34862526 | 35421572 | chr17 | 35331451 | 35333250 | Ltb           |
| chr17 | 34862526 | 35421572 | chr17 | 35331916 | 35331994 | Mir6973a      |
| chr17 | 34862526 | 35421572 | chr17 | 35336311 | 35338952 | Tnf           |
| chr17 | 34862526 | 35421572 | chr17 | 35341419 | 35341502 | Mir6974       |
| chr17 | 34862526 | 35421572 | chr17 | 35357119 | 35372760 | Nfkbil1       |
| chr17 | 34862526 | 35421572 | chr17 | 35373540 | 35375712 | Atp6v1g2      |
| chr17 | 34862526 | 35421572 | chr17 | 35381019 | 35381080 | Mir6975       |
| chr17 | 34862526 | 35421572 | chr17 | 35388233 | 35388350 | Mir8094       |
| chr17 | 34862526 | 35421572 | chr17 | 35400038 | 35404442 | H2-D1         |
| chr17 | 34862526 | 35421572 | chr17 | 35400067 | 35403675 | H2-L          |
| chr17 | 34862526 | 35421572 | chr17 | 34946036 | 34960399 | C4a           |
| chr17 | 34862526 | 35421572 | chr17 | 34960937 | 34973848 | Stk19         |
| chr17 | 34862526 | 35421572 | chr17 | 34976170 | 34987149 | Skiv2l        |
| chr17 | 34862526 | 35421572 | chr17 | 34999546 | 35019045 | C2            |
| chr17 | 34862526 | 35421572 | chr17 | 35035436 | 35050995 | Ehmt2         |
| chr17 | 34862526 | 35421572 | chr17 | 35051410 | 35067381 | Slc44a4       |
| chr17 | 34862526 | 35421572 | chr17 | 35093373 | 35096183 | Hspa1b        |
| chr17 | 34862526 | 35421572 | chr17 | 35109647 | 35116173 | Hspa1l        |
| chr17 | 34862526 | 35421572 | chr17 | 35137851 | 35153274 | Vars          |
| chr17 | 34862526 | 35421572 | chr17 | 35153523 | 35163686 | Vwa7          |
| chr17 | 34862526 | 35421572 | chr17 | 35165549 | 35183668 | Msh5          |
| chr17 | 34862526 | 35421572 | chr17 | 35187187 | 35195664 | Clic1         |
| chr17 | 34862526 | 35421572 | chr17 | 35208292 | 35211409 | Ly6g6d        |
| chr17 | 34862526 | 35421572 | chr17 | 35272122 | 35284267 | Bag6          |
| chr17 | 34862526 | 35421572 | chr17 | 35286030 | 35301822 | Prrc2a        |
| chr17 | 34862526 | 35421572 | chr17 | 35322039 | 35325385 | Lst1          |
| chr17 | 34862526 | 35421572 | chr17 | 35340109 | 35342296 | Lta           |
| chr17 | 34862526 | 35421572 | chr17 | 35402723 | 35462354 | LOC547349     |
| chr17 | 34862526 | 35421572 | chr17 | 34993318 | 34999459 | Cfb           |
| chr17 | 34862526 | 35421572 | chr17 | 35253139 | 35258392 | Csnk2b        |
| chr17 | 34862526 | 35421572 | chr17 | 35378690 | 35390652 | Ddx39b        |
| chr17 | 46824089 | 47072858 | chr17 | 46862612 | 46866114 | Gnmt          |
| chr17 | 46824089 | 47072858 | chr17 | 46892611 | 46900661 | Ptcra         |
| chr17 | 46824089 | 47072858 | chr17 | 46909583 | 46910356 | 2310039H08Rik |
| chr17 | 46824089 | 47072858 | chr17 | 46910855 | 46919605 | Rpl7l1        |
| chr17 | 46824089 | 47072858 | chr17 | 47027569 | 47029412 | Tbcc          |
| chr17 | 46824089 | 47072858 | chr17 | 46819939 | 46841951 | Ppp2r5d       |
| chr17 | 46824089 | 47072858 | chr17 | 46848411 | 46862490 | Pex6          |
| chr17 | 46824089 | 47072858 | chr17 | 46872661 | 46889161 | Cnpy3         |

|       |          |          |       |          |          |               |
|-------|----------|----------|-------|----------|----------|---------------|
| chr17 | 46824089 | 47072858 | chr17 | 46935064 | 46968362 | Gltscr1l      |
| chr17 | 46824089 | 47072858 | chr17 | 47065239 | 47147481 | Ubr2          |
| chr17 | 46824089 | 47072858 | chr17 | 47047433 | 47061875 | Prph2         |
| chr17 | 74989703 | 75095852 | chr17 | 74927634 | 75102696 | Birc6         |
| chr18 | 5109702  | 5479417  | chr18 | 5046586  | 5119291  | Svil          |
| chr18 | 5109702  | 5479417  | chr18 | 5210028  | 5334437  | Zfp438        |
| chr18 | 12019793 | 12385397 | chr18 | 12287358 | 12315876 | Riok3         |
| chr18 | 12019793 | 12385397 | chr18 | 12327238 | 12348478 | 3110002H16Rik |
| chr18 | 12019793 | 12385397 | chr18 | 12348202 | 12394895 | Npc1          |
| chr18 | 12019793 | 12385397 | chr18 | 11997782 | 12104136 | Cables1       |
| chr18 | 12019793 | 12385397 | chr18 | 12140447 | 12279962 | Tmem241       |
| chr18 | 65714591 | 65938889 | chr18 | 65857921 | 65911191 | Oacyl         |
| chr18 | 65714591 | 65938889 | chr18 | 65739883 | 65849090 | Zfp532        |
| chr18 | 78340308 | 78782570 | chr18 | 78342882 | 78793689 | Slc14a2       |
| chr19 | 6942032  | 7071960  | chr19 | 6981308  | 6984135  | Prdx5         |
| chr19 | 6942032  | 7071960  | chr19 | 6984187  | 6985516  | Trmt112       |
| chr19 | 6942032  | 7071960  | chr19 | 6988685  | 6988776  | Mir6990       |
| chr19 | 6942032  | 7071960  | chr19 | 6996915  | 6999870  | Tex40         |
| chr19 | 6942032  | 7071960  | chr19 | 7000179  | 7009005  | Kcnk4         |
| chr19 | 6942032  | 7071960  | chr19 | 7012559  | 7016940  | Gpr137        |
| chr19 | 6942032  | 7071960  | chr19 | 7016350  | 7026395  | Bad           |
| chr19 | 6942032  | 7071960  | chr19 | 7049537  | 7051814  | Ppp1r14b      |
| chr19 | 6942032  | 7071960  | chr19 | 7052228  | 7054951  | Fkbp2         |
| chr19 | 6942032  | 7071960  | chr19 | 7062400  | 7066762  | Dnajc4        |
| chr19 | 6942032  | 7071960  | chr19 | 7067508  | 7070527  | Nudt22        |
| chr19 | 6942032  | 7071960  | chr19 | 7070620  | 7073536  | Trpt1         |
| chr19 | 6942032  | 7071960  | chr19 | 6985466  | 6996298  | Esrra         |
| chr19 | 6942032  | 7071960  | chr19 | 7028202  | 7044242  | Plcb3         |
| chr19 | 6942032  | 7071960  | chr19 | 7056961  | 7062141  | Vegfb         |
| chr19 | 27112203 | 27383132 | chr19 | 27291509 | 27328721 | Vldlr         |
| chr19 | 55150109 | 55328765 | chr19 | 55267167 | 55267224 | Mir6715       |
| chr19 | 55150109 | 55328765 | chr19 | 55144223 | 55173937 | Gpam          |
| chr19 | 55150109 | 55328765 | chr19 | 55255374 | 55270803 | Tectb         |
| chr19 | 55150109 | 55328765 | chr19 | 55327858 | 55371118 | Acsl5         |
| chr19 | 55150109 | 55328765 | chr19 | 55272587 | 55315726 | Gucy2g        |
| chr2  | 34407388 | 34566460 | chr2  | 34287544 | 34480470 | Mapkap1       |
| chr2  | 34407388 | 34566460 | chr2  | 34532501 | 34610752 | Gapvd1        |
| chr2  | 49979022 | 50229255 | chr2  | 50135400 | 50152197 | Mmadhc        |
| chr2  | 49979022 | 50229255 | chr2  | 49921948 | 50049089 | Lypd6         |
| chr2  | 49979022 | 50229255 | chr2  | 50152329 | 50289487 | Gm13483       |
| chr2  | 72054465 | 72190405 | chr2  | 71819271 | 72095531 | Rapgef4       |
| chr2  | 72054465 | 72190405 | chr2  | 72123693 | 72280667 | Zak           |
| chr2  | 84158178 | 84473769 | chr2  | 84170782 | 84265423 | Calcr1        |
| chr2  | 84158178 | 84473769 | chr2  | 84340904 | 84347030 | Gm13710       |
| chr2  | 84158178 | 84473769 | chr2  | 84440937 | 84490897 | Ctnnd1        |
| chr2  | 84158178 | 84473769 | chr2  | 84273016 | 84316932 | Tfpi          |
| chr2  | 92127958 | 92319644 | chr2  | 92214832 | 92221377 | Pex16         |

|      |           |           |      |           |           |               |
|------|-----------|-----------|------|-----------|-----------|---------------|
| chr2 | 92127958  | 92319644  | chr2 | 92223074  | 92223760  | 1700029115Rik |
| chr2 | 92127958  | 92319644  | chr2 | 92227540  | 92227603  | Mir7000       |
| chr2 | 92127958  | 92319644  | chr2 | 92292921  | 92300675  | Slc35c1       |
| chr2 | 92127958  | 92319644  | chr2 | 92205202  | 92211193  | Gylt1b        |
| chr2 | 92127958  | 92319644  | chr2 | 92223832  | 92241420  | Mapk8ip1      |
| chr2 | 92127958  | 92319644  | chr2 | 92243803  | 92274226  | Cry2          |
| chr2 | 92127958  | 92319644  | chr2 | 92249048  | 92272465  | D930015M05Rik |
| chr2 | 92127958  | 92319644  | chr2 | 92251416  | 92274226  | Cry2          |
| chr2 | 92127958  | 92319644  | chr2 | 92024338  | 92204823  | Phf21a        |
| chr2 | 92127958  | 92319644  | chr2 | 92061718  | 92204823  | Phf21a        |
| chr2 | 115763462 | 115882694 | chr2 | 115686999 | 115890794 | Meis2         |
| chr2 | 119864579 | 119991231 | chr2 | 119853218 | 119868768 | Jmjd7-pla2g4b |
| chr2 | 119864579 | 119991231 | chr2 | 119859168 | 119868768 | Pla2g4b       |
| chr2 | 119864579 | 119991231 | chr2 | 119915222 | 119980311 | Ehd4          |
| chr2 | 125687615 | 126334651 | chr2 | 125977876 | 125991013 | Dtwd1         |
| chr2 | 125687615 | 126334651 | chr2 | 125860393 | 125916921 | Fgf7          |
| chr2 | 125687615 | 126334651 | chr2 | 125684953 | 125810034 | Galk2         |
| chr2 | 125687615 | 126334651 | chr2 | 126146708 | 126317289 | Atp8b4        |
| chr2 | 125687615 | 126334651 | chr2 | 125809218 | 125977740 | Fam227b       |
| chr2 | 126773038 | 126943428 | chr2 | 126896392 | 126922820 | Blvra         |
| chr2 | 126773038 | 126943428 | chr2 | 126929545 | 126959690 | Ncaph         |
| chr2 | 126773038 | 126943428 | chr2 | 126834446 | 126895550 | Ap4e1         |
| chr2 | 136396739 | 136547549 | chr2 | 136539185 | 136608164 | Snap25        |
| chr2 | 166802924 | 166925974 | chr2 | 166888433 | 166891362 | 1500012F01Rik |
| chr2 | 166802924 | 166925974 | chr2 | 166890792 | 166890858 | Snord12       |
| chr2 | 166802924 | 166925974 | chr2 | 166773641 | 166821778 | Stau1         |
| chr2 | 166802924 | 166925974 | chr2 | 166861296 | 166888515 | Znfx1         |
| chr2 | 166802924 | 166925974 | chr2 | 166840812 | 166860445 | Ddx27         |
| chr2 | 166802924 | 166925974 | chr2 | 166921468 | 167014318 | Kcnb1         |
| chr3 | 40972448  | 41336833  | chr3 | 41291602  | 41297121  | C430002E04Rik |
| chr3 | 65209910  | 65407936  | chr3 | 65331406  | 65333336  | 4931440P22Rik |
| chr3 | 65209910  | 65407936  | chr3 | 65332368  | 65359440  | Tiparp        |
| chr3 | 84009504  | 84180493  | chr3 | 84153297  | 84183843  | 4930565D16Rik |
| chr3 | 84009504  | 84180493  | chr3 | 83964360  | 84108697  | Trim2         |
| chr3 | 84597178  | 84861453  | chr3 | 84768977  | 84769502  | Dear1         |
| chr3 | 84597178  | 84861453  | chr3 | 84619498  | 84783120  | Fbxw7         |
| chr3 | 85540568  | 85913527  | chr3 | 85463984  | 85550131  | Fam160a1      |
| chr3 | 85540568  | 85913527  | chr3 | 85673767  | 85691440  | Glt28d2       |
| chr3 | 85540568  | 85913527  | chr3 | 85797731  | 85806413  | Prss48        |
| chr3 | 85540568  | 85913527  | chr3 | 85888355  | 85934443  | Sh3d19        |
| chr3 | 86022518  | 86902848  | chr3 | 86349502  | 86352205  | Mab21l2       |
| chr3 | 86022518  | 86902848  | chr3 | 86790507  | 86793454  | Cd1d2         |
| chr3 | 86022518  | 86902848  | chr3 | 86799757  | 86803262  | Cd1d1         |
| chr3 | 86022518  | 86902848  | chr3 | 86028611  | 86586616  | Lrba          |
| chr3 | 86022518  | 86902848  | chr3 | 86590071  | 86724806  | Dclk2         |
| chr3 | 86022518  | 86902848  | chr3 | 86882513  | 86978669  | Kirrel        |
| chr3 | 87386573  | 87553683  | chr3 | 87540844  | 87552545  | Lrrc71        |

|      |          |          |      |          |          |               |
|------|----------|----------|------|----------|----------|---------------|
| chr3 | 87386573 | 87553683 | chr3 | 87422672 | 87541955 | Arhgef11      |
| chr3 | 87386573 | 87553683 | chr3 | 87553018 | 87572875 | Pear1         |
| chr3 | 90112165 | 90292778 | chr3 | 90189154 | 90193849 | Slc27a3       |
| chr3 | 90112165 | 90292778 | chr3 | 90145575 | 90162042 | Gatad2b       |
| chr3 | 90112165 | 90292778 | chr3 | 90195301 | 90237558 | Ints3         |
| chr3 | 90112165 | 90292778 | chr3 | 90254513 | 90269788 | Npr1          |
| chr3 | 90112165 | 90292778 | chr3 | 90280122 | 90292301 | Ilf2          |
| chr3 | 90112165 | 90292778 | chr3 | 90291947 | 90294935 | Snapin        |
| chr3 | 94788109 | 94985795 | chr3 | 94808089 | 94808161 | Mir7013       |
| chr3 | 94788109 | 94985795 | chr3 | 94836612 | 94846536 | Psmc4         |
| chr3 | 94788109 | 94985795 | chr3 | 94914963 | 94926973 | Vps72         |
| chr3 | 94788109 | 94985795 | chr3 | 94933640 | 94937934 | Scnm1         |
| chr3 | 94788109 | 94985795 | chr3 | 94938009 | 94943447 | Lysmd1        |
| chr3 | 94788109 | 94985795 | chr3 | 94942981 | 94943108 | Mir8099-1     |
| chr3 | 94788109 | 94985795 | chr3 | 94942981 | 94943108 | Mir8099-2     |
| chr3 | 94788109 | 94985795 | chr3 | 94964341 | 94977972 | Sema6c        |
| chr3 | 94788109 | 94985795 | chr3 | 94778652 | 94810765 | Pi4kb         |
| chr3 | 94788109 | 94985795 | chr3 | 94810623 | 94819160 | Zfp687        |
| chr3 | 94788109 | 94985795 | chr3 | 94928435 | 94933130 | Tmod4         |
| chr3 | 94788109 | 94985795 | chr3 | 94943442 | 94946282 | Tnfaip8l2     |
| chr3 | 94788109 | 94985795 | chr3 | 94985689 | 95021864 | Gabpb2        |
| chr3 | 94788109 | 94985795 | chr3 | 94863519 | 94910780 | Pip5k1a       |
| chr3 | 95421138 | 95713944 | chr3 | 95428901 | 95436039 | Ensa          |
| chr3 | 95421138 | 95713944 | chr3 | 95462642 | 95467101 | Mcl1          |
| chr3 | 95421138 | 95713944 | chr3 | 95538070 | 95543492 | Ecm1          |
| chr3 | 95421138 | 95713944 | chr3 | 95538833 | 95538896 | Mir7014       |
| chr3 | 95421138 | 95713944 | chr3 | 95666574 | 95674542 | Mrps21        |
| chr3 | 95421138 | 95713944 | chr3 | 95688895 | 95695853 | BC028528      |
| chr3 | 95421138 | 95713944 | chr3 | 95701722 | 95708562 | Car14         |
| chr3 | 95421138 | 95713944 | chr3 | 95480126 | 95491781 | Adamtsl4      |
| chr3 | 95421138 | 95713944 | chr3 | 95563795 | 95622876 | Rprd2         |
| chr3 | 95421138 | 95713944 | chr3 | 95634544 | 95659676 | Prpf3         |
| chr3 | 95421138 | 95713944 | chr3 | 95697843 | 95702515 | Aph1a         |
| chr3 | 95421138 | 95713944 | chr3 | 95543896 | 95558900 | Tars2         |
| chr3 | 95421138 | 95713944 | chr3 | 95675444 | 95693016 | C920021L13Rik |
| chr3 | 95421138 | 95713944 | chr3 | 95682427 | 95686151 | Gm129         |
| chr3 | 95421138 | 95713944 | chr3 | 95392855 | 95423169 | Golph3l       |
| chr3 | 95832500 | 96115923 | chr3 | 95965892 | 95975641 | Mtmr11        |
| chr3 | 95832500 | 96115923 | chr3 | 96000510 | 96001509 | Bola1         |
| chr3 | 95832500 | 96115923 | chr3 | 96023838 | 96024231 | Hist2h2ab     |
| chr3 | 95832500 | 96115923 | chr3 | 96024377 | 96024767 | Hist2h2ac     |
| chr3 | 95832500 | 96115923 | chr3 | 96043638 | 96044216 | Hist2h2aa1    |
| chr3 | 95832500 | 96115923 | chr3 | 96043638 | 96050038 | Hist2h2aa2    |
| chr3 | 95832500 | 96115923 | chr3 | 96049460 | 96050038 | Hist2h2aa1    |
| chr3 | 95832500 | 96115923 | chr3 | 96050607 | 96052432 | Hist2h3c1     |
| chr3 | 95832500 | 96115923 | chr3 | 96066892 | 96067240 | Hist2h4       |
| chr3 | 95832500 | 96115923 | chr3 | 96072616 | 96073027 | Hist2h3b      |

|      |           |           |      |           |           |               |
|------|-----------|-----------|------|-----------|-----------|---------------|
| chr3 | 95832500  | 96115923  | chr3 | 96073622  | 96074115  | Hist2h2bb     |
| chr3 | 95832500  | 96115923  | chr3 | 95976472  | 95981487  | Sf3b4         |
| chr3 | 95832500  | 96115923  | chr3 | 95985149  | 95999103  | Sv2a          |
| chr3 | 95832500  | 96115923  | chr3 | 96025043  | 96027661  | Hist2h2be     |
| chr3 | 95832500  | 96115923  | chr3 | 96042030  | 96043050  | Hist2h3c2     |
| chr3 | 95832500  | 96115923  | chr3 | 96086831  | 96097892  | Fcgr1         |
| chr3 | 95832500  | 96115923  | chr3 | 95803754  | 95862378  | Vps45         |
| chr3 | 95832500  | 96115923  | chr3 | 95908449  | 95965052  | Otud7b        |
| chr3 | 97471618  | 97609101  | chr3 | 97494431  | 97494485  | Mir7225       |
| chr3 | 97471618  | 97609101  | chr3 | 97462134  | 97476990  | Prkab2        |
| chr3 | 97471618  | 97609101  | chr3 | 97542766  | 97672235  | Pde4dip       |
| chr3 | 97471618  | 97609101  | chr3 | 97493751  | 97692630  | Pde4dip       |
| chr3 | 100911571 | 101101312 | chr3 | 100844158 | 100914089 | Ptgfrn        |
| chr3 | 100911571 | 101101312 | chr3 | 101079830 | 101091862 | Cd2           |
| chr3 | 101611105 | 101768893 | chr3 | 101616998 | 101640146 | Mab21l3       |
| chr3 | 101611105 | 101768893 | chr3 | 101659693 | 101728376 | Slc22a15      |
| chr3 | 107895909 | 108036746 | chr3 | 107895983 | 107904348 | Gnat2         |
| chr3 | 107895909 | 108036746 | chr3 | 107989206 | 107995204 | Amigo1        |
| chr3 | 107895909 | 108036746 | chr3 | 108005172 | 108013852 | Atxn7l2       |
| chr3 | 107895909 | 108036746 | chr3 | 107910192 | 107949070 | Gnai3         |
| chr3 | 107895909 | 108036746 | chr3 | 107951238 | 107957800 | Gpr61         |
| chr3 | 107895909 | 108036746 | chr3 | 108015183 | 108029517 | Sypl2         |
| chr3 | 107895909 | 108036746 | chr3 | 107998688 | 108003752 | Cyb561d1      |
| chr3 | 131628665 | 131985812 | chr3 | 131748255 | 131843268 | Dkk2          |
| chr3 | 143668474 | 143914205 | chr3 | 143851493 | 143868219 | Lmo4          |
| chr3 | 146223631 | 146519732 | chr3 | 146309222 | 146314281 | 4930503B20Rik |
| chr3 | 146223631 | 146519732 | chr3 | 146304895 | 146314679 | Gm16325       |
| chr3 | 146223631 | 146519732 | chr3 | 146244336 | 146278562 | Dnase2b       |
| chr3 | 146223631 | 146519732 | chr3 | 146260112 | 146294447 | Uox           |
| chr3 | 146223631 | 146519732 | chr3 | 146392542 | 146475910 | Prkacb        |
| chr3 | 146223631 | 146519732 | chr3 | 146515330 | 146645714 | Ttll7         |
| chr4 | 11575798  | 11924491  | chr4 | 11885331  | 11893597  | Pdp1          |
| chr4 | 11575798  | 11924491  | chr4 | 11631593  | 11642140  | Gem           |
| chr4 | 11575798  | 11924491  | chr4 | 11685303  | 11745052  | Cdh17         |
| chr4 | 11575798  | 11924491  | chr4 | 11893720  | 11921442  | 1700123M08Rik |
| chr4 | 41043741  | 41172208  | chr4 | 41061459  | 41071372  | Nol6          |
| chr4 | 41043741  | 41172208  | chr4 | 41039756  | 41045216  | Aqp3          |
| chr4 | 41043741  | 41172208  | chr4 | 41083053  | 41140403  | Ube2r2        |
| chr4 | 41043741  | 41172208  | chr4 | 41141347  | 41222168  | Ubap2         |
| chr4 | 41326663  | 41441814  | chr4 | 41296028  | 41336799  | Ubap1         |
| chr4 | 41326663  | 41441814  | chr4 | 41337780  | 41411881  | Kif24         |
| chr4 | 41326663  | 41441814  | chr4 | 41412180  | 41427959  | Nudt2         |
| chr4 | 56576813  | 56825680  | chr4 | 56756293  | 56757797  | Actl7a        |
| chr4 | 56576813  | 56825680  | chr4 | 56762551  | 56815203  | Ikbkap        |
| chr4 | 56576813  | 56825680  | chr4 | 56815200  | 56822477  | BC026590      |
| chr4 | 56576813  | 56825680  | chr4 | 56823806  | 56878083  | Ctnnal1       |
| chr4 | 56576813  | 56825680  | chr4 | 56752876  | 56754297  | Actl7b        |

|      |           |           |      |           |           |               |
|------|-----------|-----------|------|-----------|-----------|---------------|
| chr4 | 57215547  | 57924586  | chr4 | 57921255  | 57929136  | D630039A03Rik |
| chr4 | 57215547  | 57924586  | chr4 | 57372663  | 57377164  | 1700042G15Rik |
| chr4 | 57215547  | 57924586  | chr4 | 57858119  | 57909856  | Akap2         |
| chr4 | 57215547  | 57924586  | chr4 | 57203712  | 57314709  | Ptpn3         |
| chr4 | 57215547  | 57924586  | chr4 | 57581119  | 57730000  | Palm2         |
| chr4 | 58177580  | 58423853  | chr4 | 58055667  | 58219468  | Svep1         |
| chr4 | 58177580  | 58423853  | chr4 | 58298833  | 58387175  | Musk          |
| chr4 | 64906895  | 65098796  | chr4 | 64785207  | 65018543  | Pappa         |
| chr4 | 64906895  | 65098796  | chr4 | 65041836  | 66065517  | Astn2         |
| chr4 | 118761685 | 118996849 | chr4 | 118842122 | 118846800 | Zfp691        |
| chr4 | 118761685 | 118996849 | chr4 | 118867914 | 118873903 | Ccdc23        |
| chr4 | 118761685 | 118996849 | chr4 | 118781349 | 118809934 | Slc2a1        |
| chr4 | 118761685 | 118996849 | chr4 | 118848061 | 118862616 | Ermap         |
| chr4 | 118761685 | 118996849 | chr4 | 118897742 | 118905329 | AU022252      |
| chr4 | 118761685 | 118996849 | chr4 | 118905519 | 118921582 | Lepre1        |
| chr4 | 118761685 | 118996849 | chr4 | 118928045 | 118935043 | Cldn19        |
| chr4 | 118761685 | 118996849 | chr4 | 118949931 | 118967118 | Ybx1          |
| chr4 | 118761685 | 118996849 | chr4 | 118972614 | 118993128 | Ppih          |
| chr4 | 118761685 | 118996849 | chr4 | 118877659 | 118890822 | 4930538K18Rik |
| chr4 | 118761685 | 118996849 | chr4 | 118995497 | 119088126 | Ccdc30        |
| chr5 | 15444505  | 15559408  | chr5 | 15440508  | 15880329  | Cacna2d1      |
| chr5 | 20408744  | 20558420  | chr5 | 20456806  | 20462216  | A630072M18Rik |
| chr5 | 20408744  | 20558420  | chr5 | 20492462  | 20561615  | Ptpn12        |
| chr5 | 20408744  | 20558420  | chr5 | 20398841  | 20457640  | Rsbnl1        |
| chr5 | 30054571  | 30310220  | chr5 | 30061873  | 30062476  | Gm5129        |
| chr5 | 30054571  | 30310220  | chr5 | 30062437  | 30113018  | Dnajb6        |
| chr5 | 30054571  | 30310220  | chr5 | 30115550  | 30297028  | Mir6362       |
| chr5 | 32744087  | 32919300  | chr5 | 32913543  | 32989439  | Yes1          |
| chr5 | 32744087  | 32919300  | chr5 | 32761342  | 32796085  | Ppp1cb        |
| chr5 | 34412073  | 34564201  | chr5 | 34496547  | 34512073  | Haus3         |
| chr5 | 34412073  | 34564201  | chr5 | 34519228  | 34530359  | Mxd4          |
| chr5 | 34412073  | 34564201  | chr5 | 34349846  | 34512097  | Poln          |
| chr5 | 34412073  | 34564201  | chr5 | 34461388  | 34477988  | 4930557J02Rik |
| chr5 | 34412073  | 34564201  | chr5 | 34537542  | 34630973  | Zfyve28       |
| chr5 | 35223631  | 35428241  | chr5 | 35258563  | 35266488  | Msantd1       |
| chr5 | 35223631  | 35428241  | chr5 | 35363697  | 35363764  | Mir3097       |
| chr5 | 35223631  | 35428241  | chr5 | 35292096  | 35376242  | Rgs12         |
| chr5 | 35223631  | 35428241  | chr5 | 35399732  | 35430480  | Dok7          |
| chr5 | 35223631  | 35428241  | chr5 | 35104388  | 35255170  | Htt           |
| chr5 | 35223631  | 35428241  | chr5 | 35384201  | 35391085  | Hgfac         |
| chr5 | 64740328  | 65215006  | chr5 | 64868246  | 64875205  | C030018K13Rik |
| chr5 | 64740328  | 65215006  | chr5 | 64846051  | 64859181  | 1700027F09Rik |
| chr5 | 64740328  | 65215006  | chr5 | 64985101  | 65001938  | Gm3716        |
| chr5 | 64740328  | 65215006  | chr5 | 65194761  | 65221368  | Klf3          |
| chr5 | 64740328  | 65215006  | chr5 | 64551449  | 64742725  | Tbc1d1        |
| chr5 | 65558545  | 65763893  | chr5 | 65590934  | 65651654  | Wdr19         |
| chr5 | 65558545  | 65763893  | chr5 | 65739649  | 65775242  | Klb           |



|      |           |           |      |           |           |               |
|------|-----------|-----------|------|-----------|-----------|---------------|
| chr5 | 65558545  | 65763893  | chr5 | 65522469  | 65559381  | Klh15         |
| chr5 | 65558545  | 65763893  | chr5 | 65653090  | 65726878  | Rfc1          |
| chr5 | 137966849 | 138108845 | chr5 | 137960107 | 137969163 | Gigyf1        |
| chr5 | 137966849 | 138108845 | chr5 | 137970707 | 137970822 | Mir6418       |
| chr5 | 137966849 | 138108845 | chr5 | 138037874 | 138042287 | Mospd3        |
| chr5 | 137966849 | 138108845 | chr5 | 138053732 | 138066306 | Fbxo24        |
| chr5 | 137966849 | 138108845 | chr5 | 138070350 | 138082327 | Lrch4         |
| chr5 | 137966849 | 138108845 | chr5 | 138070350 | 138084124 | Gm20605       |
| chr5 | 137966849 | 138108845 | chr5 | 138082700 | 138084130 | Sap25         |
| chr5 | 137966849 | 138108845 | chr5 | 137969356 | 137974457 | Gnb2          |
| chr5 | 137966849 | 138108845 | chr5 | 137994782 | 138010801 | Actl6b        |
| chr5 | 137966849 | 138108845 | chr5 | 138046334 | 138052632 | Pcolce        |
| chr5 | 137966849 | 138108845 | chr5 | 138084259 | 138086942 | Irs3          |
| chr5 | 137966849 | 138108845 | chr5 | 138092081 | 138125921 | Agfg2         |
| chr5 | 137966849 | 138108845 | chr5 | 138011078 | 138028709 | Tfr2          |
| chr7 | 20132277  | 20269527  | chr7 | 20162635  | 20166005  | Zfp296        |
| chr7 | 20132277  | 20269527  | chr7 | 20256927  | 20263290  | Apoc2         |
| chr7 | 20132277  | 20269527  | chr7 | 20263432  | 20266809  | Apoc4         |
| chr7 | 20132277  | 20269527  | chr7 | 20116315  | 20147747  | Ppp1r37       |
| chr7 | 20132277  | 20269527  | chr7 | 20150297  | 20158692  | Gemin7        |
| chr7 | 20132277  | 20269527  | chr7 | 20191570  | 20214787  | Relb          |
| chr7 | 20132277  | 20269527  | chr7 | 20216928  | 20250379  | Clptm1        |
| chr7 | 20132277  | 20269527  | chr7 | 20166391  | 20189817  | Clasrp        |
| chr7 | 29126349  | 29310336  | chr7 | 29135707  | 29137717  | Rps16         |
| chr7 | 29126349  | 29310336  | chr7 | 29136558  | 29136652  | AF357399      |
| chr7 | 29126349  | 29310336  | chr7 | 29170265  | 29177709  | Med29         |
| chr7 | 29126349  | 29310336  | chr7 | 29281959  | 29282511  | 1700028B04Rik |
| chr7 | 29126349  | 29310336  | chr7 | 29307854  | 29309341  | Ifnl3         |
| chr7 | 29126349  | 29310336  | chr7 | 29144622  | 29157681  | Plekhg2       |
| chr7 | 29126349  | 29310336  | chr7 | 29161802  | 29164247  | Zfp36         |
| chr7 | 29126349  | 29310336  | chr7 | 29178014  | 29184402  | Paf1          |
| chr7 | 29126349  | 29310336  | chr7 | 29184540  | 29221210  | Samd4b        |
| chr7 | 29126349  | 29310336  | chr7 | 29237003  | 29252567  | Lrfn1         |
| chr7 | 29126349  | 29310336  | chr7 | 29293879  | 29295379  | Ifnl2         |
| chr7 | 29126349  | 29310336  | chr7 | 29222465  | 29231914  | Gmfg          |
| chr7 | 30821384  | 30954529  | chr7 | 30821377  | 30836415  | Zfp14         |
| chr7 | 30821384  | 30954529  | chr7 | 30841052  | 30857842  | Zfp82         |
| chr7 | 30821384  | 30954529  | chr7 | 30862355  | 30875529  | Zfp566        |
| chr7 | 30821384  | 30954529  | chr7 | 30880094  | 30892633  | Zfp260        |
| chr7 | 30821384  | 30954529  | chr7 | 30906966  | 30920051  | Zfp382        |
| chr7 | 30821384  | 30954529  | chr7 | 30946286  | 30954746  | Zfp146        |
| chr7 | 35803644  | 36006056  | chr7 | 35904311  | 35906951  | Cebpa         |
| chr7 | 35803644  | 36006056  | chr7 | 35831440  | 35841585  | Cebpg         |
| chr7 | 35803644  | 36006056  | chr7 | 35971403  | 35986130  | Slc7a10       |
| chr7 | 35803644  | 36006056  | chr7 | 35985952  | 36000364  | Lrp3          |
| chr7 | 35803644  | 36006056  | chr7 | 35697425  | 35829727  | Pepd          |
| chr7 | 80650044  | 80823864  | chr7 | 80684683  | 80703281  | 1810026B05Rik |

|      |           |           |      |           |           |               |
|------|-----------|-----------|------|-----------|-----------|---------------|
| chr7 | 80650044  | 80823864  | chr7 | 80571537  | 80686632  | Chd2          |
| chr7 | 96461377  | 96571403  | chr7 | 96552875  | 96558620  | Fzd4          |
| chr7 | 96461377  | 96571403  | chr7 | 96288230  | 96487297  | Tmem135       |
| chr7 | 99795247  | 100070894 | chr7 | 99889215  | 99889969  | 4632427E13Rik |
| chr7 | 99795247  | 100070894 | chr7 | 99792221  | 99818422  | Pcf11         |
| chr7 | 99795247  | 100070894 | chr7 | 99890223  | 99985627  | Rab30         |
| chr7 | 99795247  | 100070894 | chr7 | 100023762 | 100083091 | Prcp          |
| chr7 | 99795247  | 100070894 | chr7 | 100006036 | 100022742 | 4632434I11Rik |
| chr7 | 103672075 | 103885803 | chr7 | 103359146 | 104057064 | Tenm4         |
| chr7 | 104108949 | 104209245 | chr7 | 104100036 | 104213267 | Nars2         |
| chr8 | 10776855  | 11000635  | chr8 | 10899921  | 10902334  | 4833411C07Rik |
| chr8 | 10776855  | 11000635  | chr8 | 10924426  | 10928457  | 3930402G23Rik |
| chr8 | 10776855  | 11000635  | chr8 | 10986963  | 11008430  | Irs2          |
| chr8 | 10776855  | 11000635  | chr8 | 10870421  | 10882454  | B930025P03Rik |
| chr8 | 26096466  | 26199921  | chr8 | 26127682  | 26133732  | Tm2d2         |
| chr8 | 26096466  | 26199921  | chr8 | 26135399  | 26149434  | Htra4         |
| chr8 | 26096466  | 26199921  | chr8 | 26149616  | 26212283  | Plekha2       |
| chr8 | 26096466  | 26199921  | chr8 | 26060082  | 26127394  | Adam9         |
| chr8 | 26342721  | 26620212  | chr8 | 26413121  | 26416742  | 5430421F17Rik |
| chr8 | 46674406  | 46782652  | chr8 | 46593141  | 46913260  | Sorbs2        |
| chr8 | 71377017  | 71508320  | chr8 | 71404453  | 71430831  | Lpl           |
| chr8 | 95372954  | 95595996  | chr8 | 95425293  | 95426308  | Capns2        |
| chr8 | 95372954  | 95595996  | chr8 | 95351226  | 95377319  | Mmp2          |
| chr8 | 95372954  | 95595996  | chr8 | 95484945  | 95525566  | Slc6a2        |
| chr8 | 95372954  | 95595996  | chr8 | 95580625  | 95603916  | Ces1b         |
| chr8 | 95372954  | 95595996  | chr8 | 95544113  | 95572091  | Ces1a         |
| chr8 | 95372954  | 95595996  | chr8 | 95379248  | 95443178  | Lpcat2        |
| chr8 | 96206855  | 96854141  | chr8 | 96335593  | 96337455  | 4930488L21Rik |
| chr8 | 96206855  | 96854141  | chr8 | 96661103  | 96662931  | Mt4           |
| chr8 | 96206855  | 96854141  | chr8 | 96676506  | 96678048  | Mt3           |
| chr8 | 96206855  | 96854141  | chr8 | 96696517  | 96697467  | Mt2           |
| chr8 | 96206855  | 96854141  | chr8 | 96702988  | 96704227  | Mt1           |
| chr8 | 96206855  | 96854141  | chr8 | 96848210  | 96848281  | Mir138-2      |
| chr8 | 96206855  | 96854141  | chr8 | 96495487  | 96536540  | Amfr          |
| chr8 | 96206855  | 96854141  | chr8 | 96543302  | 96560939  | Nudt21        |
| chr8 | 96206855  | 96854141  | chr8 | 96561097  | 96591822  | Ogfod1        |
| chr8 | 96206855  | 96854141  | chr8 | 96738500  | 96838966  | Nup93         |
| chr8 | 96206855  | 96854141  | chr8 | 96591853  | 96622711  | Bbs2          |
| chr8 | 96206855  | 96854141  | chr8 | 96853107  | 96890121  | Slc12a3       |
| chr8 | 96206855  | 96854141  | chr8 | 96334737  | 96493288  | Gnao1         |
| chr9 | 35049982  | 35238915  | chr9 | 35088689  | 35093008  | 4933422A05Rik |
| chr9 | 35049982  | 35238915  | chr9 | 35024549  | 35075390  | Fam118b       |
| chr9 | 35049982  | 35238915  | chr9 | 35075465  | 35083542  | Rpusd4        |
| chr9 | 44238770  | 44372438  | chr9 | 44242316  | 44248951  | Foxr1         |
| chr9 | 44238770  | 44372438  | chr9 | 44260797  | 44262850  | Upk2          |
| chr9 | 44238770  | 44372438  | chr9 | 44307218  | 44318495  | Bcl9l         |
| chr9 | 44238770  | 44372438  | chr9 | 44319869  | 44334504  | Cxcr5         |

|      |           |           |      |           |           |               |
|------|-----------|-----------|------|-----------|-----------|---------------|
| chr9 | 44453670  | 44557108  | chr9 | 44481315  | 44494388  | Treh          |
| chr9 | 44453670  | 44557108  | chr9 | 44494390  | 44543281  | Phldb1        |
| chr9 | 44453670  | 44557108  | chr9 | 44550227  | 44575891  | Arcn1         |
| chr9 | 50561290  | 50671842  | chr9 | 50570932  | 50576257  | 1110032A03Rik |
| chr9 | 50561290  | 50671842  | chr9 | 50560862  | 50564738  | Cryab         |
| chr9 | 50561290  | 50671842  | chr9 | 50576342  | 50580775  | Fdxacb1       |
| chr9 | 50561290  | 50671842  | chr9 | 50665028  | 50702334  | Ppp2r1b       |
| chr9 | 50561290  | 50671842  | chr9 | 50583329  | 50651744  | Alg9          |
| chr9 | 51386310  | 51603272  | chr9 | 51573456  | 51661164  | Arhgap20      |
| chr9 | 59386480  | 59960531  | chr9 | 59790577  | 59797886  | Nr2e3         |
| chr9 | 59386480  | 59960531  | chr9 | 59387473  | 59412912  | Hexa          |
| chr9 | 59386480  | 59960531  | chr9 | 59426143  | 59455099  | Celf6         |
| chr9 | 59386480  | 59960531  | chr9 | 59465090  | 59498097  | Parp6         |
| chr9 | 59386480  | 59960531  | chr9 | 59555570  | 59564231  | Gramd2        |
| chr9 | 59386480  | 59960531  | chr9 | 59582065  | 59598456  | Senp8         |
| chr9 | 59386480  | 59960531  | chr9 | 59799100  | 59806851  | Gm7616        |
| chr9 | 59386480  | 59960531  | chr9 | 59504174  | 59527182  | Pkm           |
| chr9 | 59386480  | 59960531  | chr9 | 59814737  | 60358842  | Thsd4         |
| chr9 | 59386480  | 59960531  | chr9 | 59598980  | 59776673  | Myo9a         |
| chr9 | 65380860  | 65997419  | chr9 | 65912982  | 65917538  | Snx22         |
| chr9 | 65380860  | 65997419  | chr9 | 65435011  | 65443769  | Pif1          |
| chr9 | 65380860  | 65997419  | chr9 | 65478388  | 65508325  | Rbpms2        |
| chr9 | 65380860  | 65997419  | chr9 | 65676732  | 65756601  | Trip4         |
| chr9 | 65380860  | 65997419  | chr9 | 65738129  | 65751358  | 2810417H13Rik |
| chr9 | 65380860  | 65997419  | chr9 | 65907975  | 65914436  | Ppib          |
| chr9 | 65380860  | 65997419  | chr9 | 65935933  | 65972693  | Snx1          |
| chr9 | 65380860  | 65997419  | chr9 | 65974417  | 65986775  | Fam96a        |
| chr9 | 65380860  | 65997419  | chr9 | 65400383  | 65427894  | Plekho2       |
| chr9 | 65380860  | 65997419  | chr9 | 65524354  | 65538107  | Oaz2          |
| chr9 | 65380860  | 65997419  | chr9 | 65539389  | 65675371  | Zfp609        |
| chr9 | 65380860  | 65997419  | chr9 | 65756816  | 65892821  | Csnk1g1       |
| chr9 | 66182286  | 66423342  | chr9 | 66356265  | 66362400  | Fbxl22        |
| chr9 | 66182286  | 66423342  | chr9 | 66365687  | 66440787  | Usp3          |
| chr9 | 66182286  | 66423342  | chr9 | 66198256  | 66356582  | Herc1         |
| chr9 | 75646214  | 75811173  | chr9 | 75623171  | 75746824  | Bmp5          |
| chr9 | 102508151 | 102762621 | chr9 | 102528625 | 102536574 | Anapc13       |
| chr9 | 102508151 | 102762621 | chr9 | 102641977 | 102659015 | Gm5627        |
| chr9 | 102508151 | 102762621 | chr9 | 102488907 | 102528454 | Cep63         |
| chr9 | 102508151 | 102762621 | chr9 | 102620133 | 102635747 | Amotl2        |
| chr9 | 102508151 | 102762621 | chr9 | 102737249 | 102810637 | Ryk           |
| chr9 | 107037567 | 107201552 | chr9 | 107095137 | 107096392 | AA543401      |
| chr9 | 107037567 | 107201552 | chr9 | 107157257 | 107192208 | Mapkapk3      |
| chr9 | 107037567 | 107201552 | chr9 | 107199019 | 107204292 | Cish          |
| chr9 | 107037567 | 107201552 | chr9 | 106795155 | 107134240 | Dock3         |
| chr9 | 116646743 | 116781942 | chr9 | 116481863 | 117539031 | Rbms3         |
| chr9 | 120183968 | 120303126 | chr9 | 120213190 | 120383952 | Myrip         |
| chrX | 12827053  | 12993597  | chrX | 12858147  | 12871109  | Ddx3x         |

|      |           |           |      |           |           |          |
|------|-----------|-----------|------|-----------|-----------|----------|
| chrX | 21293756  | 21414247  | chrX | 21292025  | 21319483  | Slc6a14  |
| chrX | 45061542  | 45187615  | chrX | 45162546  | 45245729  | Smarca1  |
| chrX | 48946405  | 49119858  | chrX | 48740388  | 49034779  | Hs6st2   |
| chrX | 48946405  | 49119858  | chrX | 49107135  | 49154410  | Usp26    |
| chrX | 91225788  | 91337677  | chrX | 91319969  | 91368746  | Zfx      |
| chrX | 98347341  | 98713211  | chrX | 98456715  | 98459331  | Gm614    |
| chrX | 98347341  | 98713211  | chrX | 98459725  | 98463545  | Il2rg    |
| chrX | 98347341  | 98713211  | chrX | 98572675  | 98580963  | Gjb1     |
| chrX | 98347341  | 98713211  | chrX | 98449866  | 98456212  | Foxo4    |
| chrX | 98347341  | 98713211  | chrX | 98469429  | 98494273  | Med12    |
| chrX | 98347341  | 98713211  | chrX | 98494517  | 98516689  | Nlgn3    |
| chrX | 98347341  | 98713211  | chrX | 98599722  | 98616024  | Zmym3    |
| chrX | 98347341  | 98713211  | chrX | 98624989  | 98643932  | Nono     |
| chrX | 98347341  | 98713211  | chrX | 98644447  | 98648880  | Itgb1bp2 |
| chrX | 98347341  | 98713211  | chrX | 98293124  | 98417902  | Snx12    |
| chrX | 138886872 | 139132269 | chrX | 139115942 | 139278037 | Tmem164  |

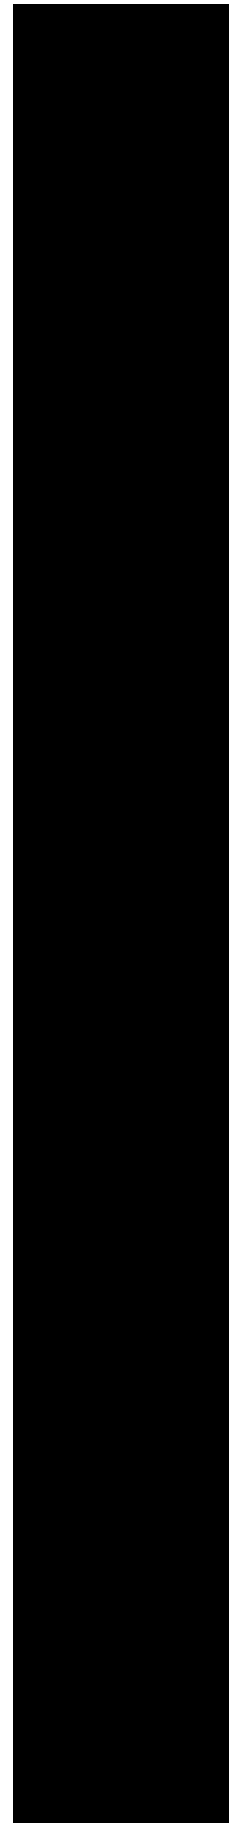





















































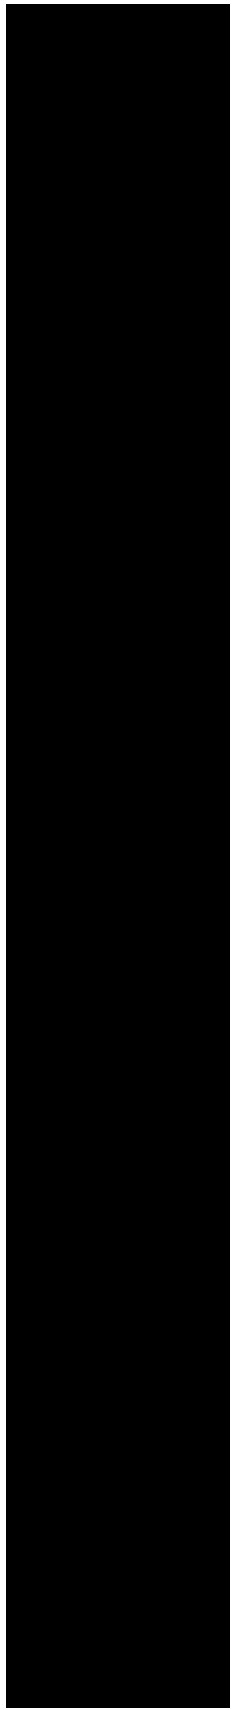



|       |           |           |       |           |           |               |       |
|-------|-----------|-----------|-------|-----------|-----------|---------------|-------|
| chr1  | 188993832 | 189204013 | chr1  | 188959171 | 189039325 | Spata17       | chr1  |
| chr1  | 188993832 | 189204013 | chr1  | 189039389 | 189175308 | Gpatch2       | chr1  |
| chr1  | 196449012 | 196912172 | chr1  | 196863233 | 196863314 | Mir29b-2      | chr1  |
| chr1  | 196449012 | 196912172 | chr1  | 196863740 | 196863828 | Mir29c        | chr1  |
| chr1  | 196449012 | 196912172 | chr1  | 196765014 | 196787486 | Cd34          | chr1  |
| chr1  | 196449012 | 196912172 | chr1  | 196781952 | 196803153 | Gm16897       | chr1  |
| chr1  | 196449012 | 196912172 | chr1  | 196843592 | 196864102 | A330023F24Rik | chr1  |
| chr1  | 196449012 | 196912172 | chr1  | 196446022 | 196643062 | Plxna2        | chr1  |
| chr1  | 196449012 | 196912172 | chr1  | 196868093 | 196918442 | Cd46          | chr1  |
| chr10 | 19346884  | 19465992  | chr10 | 19341833  | 19354487  | Il22ra2       | chr1  |
| chr10 | 19346884  | 19465992  | chr10 | 19432392  | 19479859  | Il20ra        | chr1  |
| chr10 | 19631584  | 19921242  | chr10 | 19919052  | 19921660  | 4930405J17Rik | chr1  |
| chr10 | 19631584  | 19921242  | chr10 | 19654331  | 19862556  | Map3k5        | chr1  |
| chr10 | 19631584  | 19921242  | chr10 | 19868725  | 20001396  | Map7          | chr1  |
| chr10 | 21239249  | 21476836  | chr10 | 21410650  | 21413784  | Gm5420        | chr1  |
| chr10 | 21239249  | 21476836  | chr10 | 21312950  | 21342181  | 1700020N01Rik | chr1  |
| chr10 | 23591941  | 23738343  | chr10 | 23614493  | 23625149  | Vnn1          | chr1  |
| chr10 | 23591941  | 23738343  | chr10 | 23640211  | 23641210  | Taar1         | chr1  |
| chr10 | 23591941  | 23738343  | chr10 | 23669363  | 23670395  | Taar3         | chr1  |
| chr10 | 23591941  | 23738343  | chr10 | 23680299  | 23681343  | Taar4         | chr1  |
| chr10 | 23591941  | 23738343  | chr10 | 23704414  | 23705452  | Taar6         | chr1  |
| chr10 | 23591941  | 23738343  | chr10 | 23712210  | 23713287  | Taar7a        | chr1  |
| chr10 | 23591941  | 23738343  | chr10 | 23719744  | 23720821  | Taar7b        | chr1  |
| chr10 | 23591941  | 23738343  | chr10 | 23658377  | 23661389  | Taar2         | chr1  |
| chr10 | 23591941  | 23738343  | chr10 | 23690511  | 23691525  | Taar5         | chr1  |
| chr10 | 38934851  | 39218584  | chr10 | 39089604  | 39285180  | Fyn           | chr1  |
| chr10 | 68633420  | 68768135  | chr10 | 68671299  | 68754532  | Rhobtb1       | chr1  |
| chr10 | 69606794  | 69760928  | chr10 | 69667414  | 69682459  | 2310015B20Rik | chr1  |
| chr10 | 69606794  | 69760928  | chr10 | 69559868  | 69655948  | Ccdc6         | chr1  |
| chr10 | 69606794  | 69760928  | chr10 | 69708023  | 69748699  | Slc16a9       | chr1  |
| chr10 | 82408904  | 82672938  | chr10 | 82448241  | 82658636  | Chst11        | chr1  |
| chr10 | 98379987  | 98544148  | chr10 | 98377785  | 98488777  | Atp2b1        | chr1  |
| chr10 | 99330252  | 99542819  | chr10 | 99478457  | 99563046  | Kitl          | chr1  |
| chr10 | 119649825 | 119876710 | chr10 | 119826578 | 119829849 | 9230105E05Rik | chr1  |
| chr10 | 119649825 | 119876710 | chr10 | 119645881 | 119661953 | Tmbim4        | chr1  |
| chr10 | 119649825 | 119876710 | chr10 | 119664115 | 119669126 | Llph          | chr1  |
| chr10 | 119649825 | 119876710 | chr10 | 119798330 | 119913991 | Hmga2         | chr1  |
| chr11 | 53823918  | 53928914  | chr11 | 53796627  | 53841592  | Slc22a4       | chr1  |
| chr11 | 53823918  | 53928914  | chr11 | 53914425  | 53945169  | P4ha2         | chr1  |
| chr11 | 53823918  | 53928914  | chr11 | 53868429  | 53882519  | Pdlim4        | chr10 |
| chr11 | 71955029  | 72104184  | chr11 | 72021055  | 72023989  | Txndc17       | chr10 |
| chr11 | 71955029  | 72104184  | chr11 | 72025225  | 72029094  | Med31         | chr10 |
| chr11 | 71955029  | 72104184  | chr11 | 72028639  | 72031952  | 4930563E22Rik | chr10 |
| chr11 | 71955029  | 72104184  | chr11 | 72080345  | 72082058  | 1700051A21Rik | chr10 |
| chr11 | 71955029  | 72104184  | chr11 | 71967598  | 72016873  | 4933427D14Rik | chr10 |
| chr11 | 71955029  | 72104184  | chr11 | 72055495  | 72080106  | Slc13a5       | chr10 |
| chr11 | 98258973  | 98389535  | chr11 | 98299021  | 98300302  | Mien1         | chr10 |

|       |           |           |       |           |           |               |       |
|-------|-----------|-----------|-------|-----------|-----------|---------------|-------|
| chr11 | 98258973  | 98389535  | chr11 | 98308147  | 98316687  | Grb7          | chr10 |
| chr11 | 98258973  | 98389535  | chr11 | 98249985  | 98261804  | Pgap3         | chr10 |
| chr11 | 98258973  | 98389535  | chr11 | 98273797  | 98299030  | Erbp2         | chr10 |
| chr11 | 98258973  | 98389535  | chr11 | 98326006  | 98407345  | Ikzf3         | chr10 |
| chr11 | 107902818 | 108222465 | chr11 | 107794700 | 108205202 | Prkca         | chr10 |
| chr11 | 112856139 | 113023766 | chr11 | 112905219 | 113063152 | 2610035D17Rik | chr10 |
| chr11 | 113471567 | 113665286 | chr11 | 113480794 | 113487209 | Sstr2         | chr10 |
| chr11 | 113471567 | 113665286 | chr11 | 113510842 | 113523715 | Cog1          | chr10 |
| chr11 | 113471567 | 113665286 | chr11 | 113545725 | 113555961 | D11Wsu47e     | chr10 |
| chr11 | 113471567 | 113665286 | chr11 | 113559484 | 113571331 | Cpsf4l        | chr10 |
| chr11 | 113471567 | 113665286 | chr11 | 113522632 | 113545465 | Fam104a       | chr10 |
| chr11 | 113471567 | 113665286 | chr11 | 113588163 | 113613129 | Cdc42ep4      | chr10 |
| chr11 | 113471567 | 113665286 | chr11 | 113642103 | 113927265 | Sdk2          | chr10 |
| chr12 | 33056778  | 33337190  | chr12 | 33063653  | 33067808  | Ccdc71l       | chr10 |
| chr12 | 35234966  | 35351259  | chr12 | 34732446  | 35601767  | Hdac9         | chr10 |
| chr12 | 77960581  | 78345416  | chr12 | 78038255  | 78063235  | Max           | chr10 |
| chr12 | 77960581  | 78345416  | chr12 | 77938453  | 78022399  | Fntb          | chr10 |
| chr12 | 77960581  | 78345416  | chr12 | 78339090  | 78576983  | Fut8          | chr10 |
| chr12 | 109314082 | 109699603 | chr12 | 109344640 | 109417494 | Setd3         | chr10 |
| chr12 | 109314082 | 109699603 | chr12 | 109417947 | 109441569 | Ccnk          | chr10 |
| chr12 | 109314082 | 109699603 | chr12 | 109544479 | 109566510 | Hhip1         | chr10 |
| chr12 | 109314082 | 109699603 | chr12 | 109444554 | 109513627 | Ccdc85c       | chr10 |
| chr12 | 109314082 | 109699603 | chr12 | 109572590 | 109600444 | Cyp46a1       | chr10 |
| chr12 | 109314082 | 109699603 | chr12 | 109609362 | 109777774 | Eml1          | chr10 |
| chr13 | 28494232  | 28732072  | chr13 | 28551902  | 28977291  | 2610307P16Rik | chr10 |
| chr13 | 42089806  | 42196253  | chr13 | 42147389  | 42280395  | Hivep1        | chr10 |
| chr13 | 48082922  | 48211948  | chr13 | 48055698  | 48113977  | 4931429P17Rik | chr10 |
| chr13 | 48082922  | 48211948  | chr13 | 48139599  | 48357992  | A330033J07Rik | chr10 |
| chr13 | 56743298  | 56915093  | chr13 | 56804370  | 56843739  | Smad5         | chr10 |
| chr13 | 56743298  | 56915093  | chr13 | 56874468  | 56996949  | Trpc7         | chr10 |
| chr13 | 93077164  | 93275861  | chr13 | 93124737  | 93159008  | Dhfr          | chr10 |
| chr13 | 93077164  | 93275861  | chr13 | 93195923  | 93211613  | Ankrd34b      | chr10 |
| chr13 | 93077164  | 93275861  | chr13 | 93219574  | 93253986  | Fam151b       | chr10 |
| chr13 | 93077164  | 93275861  | chr13 | 93257703  | 93300765  | Zfyve16       | chr10 |
| chr13 | 93077164  | 93275861  | chr13 | 92981835  | 93124958  | Msh3          | chr10 |
| chr13 | 96010001  | 96232106  | chr13 | 96095191  | 96107796  | Zbed3         | chr10 |
| chr13 | 96010001  | 96232106  | chr13 | 96100534  | 96100638  | Mir1940       | chr10 |
| chr13 | 96010001  | 96232106  | chr13 | 96100565  | 96100691  | Snora47       | chr10 |
| chr13 | 96010001  | 96232106  | chr13 | 96120637  | 96145312  | Aggf1         | chr10 |
| chr13 | 96010001  | 96232106  | chr13 | 95794059  | 96020259  | Pde8b         | chr10 |
| chr13 | 96010001  | 96232106  | chr13 | 96201330  | 96214786  | Crhbp         | chr10 |
| chr13 | 109616090 | 109888590 | chr13 | 109444370 | 110746177 | Pde4d         | chr10 |
| chr13 | 110565810 | 110784611 | chr13 | 110694016 | 110694096 | Mir1904       | chr10 |
| chr13 | 110565810 | 110784611 | chr13 | 109444370 | 110746177 | Pde4d         | chr10 |
| chr13 | 112123768 | 112266170 | chr13 | 112215887 | 112280249 | Gppb1         | chr10 |
| chr14 | 24421941  | 24561839  | chr14 | 24117915  | 24823427  | Kcnma1        | chr10 |
| chr14 | 45867155  | 45977818  | chr14 | 45902761  | 45938247  | Ero1l         | chr10 |

|       |           |           |       |           |           |               |       |
|-------|-----------|-----------|-------|-----------|-----------|---------------|-------|
| chr14 | 45867155  | 45977818  | chr14 | 45949498  | 45968746  | Psmc6         | chr10 |
| chr14 | 45867155  | 45977818  | chr14 | 45970860  | 45996559  | Styx          | chr10 |
| chr14 | 45867155  | 45977818  | chr14 | 45839391  | 45900651  | Gpr137c       | chr10 |
| chr14 | 56225527  | 56402170  | chr14 | 56222821  | 56228867  | Irf9          | chr10 |
| chr14 | 56225527  | 56402170  | chr14 | 56237002  | 56244232  | Rec8          | chr10 |
| chr14 | 56225527  | 56402170  | chr14 | 56254802  | 56262643  | Tm9sf1        | chr10 |
| chr14 | 56225527  | 56402170  | chr14 | 56269020  | 56271376  | Tssk4         | chr10 |
| chr14 | 56225527  | 56402170  | chr14 | 56281103  | 56290743  | Nedd8         | chr10 |
| chr14 | 56225527  | 56402170  | chr14 | 56297917  | 56300654  | Tinf2         | chr10 |
| chr14 | 56225527  | 56402170  | chr14 | 56334713  | 56341013  | Rabggta       | chr10 |
| chr14 | 56225527  | 56402170  | chr14 | 56364529  | 56374471  | Nop9          | chr10 |
| chr14 | 56225527  | 56402170  | chr14 | 56372891  | 56377261  | Cideb         | chr10 |
| chr14 | 56225527  | 56402170  | chr14 | 56380264  | 56382066  | Ltb4r2        | chr10 |
| chr14 | 56225527  | 56402170  | chr14 | 56384798  | 56387329  | Ltb4r1        | chr10 |
| chr14 | 56225527  | 56402170  | chr14 | 56244465  | 56254515  | Ipo4          | chr10 |
| chr14 | 56225527  | 56402170  | chr14 | 56276715  | 56279345  | Mdp1          | chr10 |
| chr14 | 56225527  | 56402170  | chr14 | 56291071  | 56297588  | Gmpr2         | chr10 |
| chr14 | 56225527  | 56402170  | chr14 | 56318845  | 56332329  | Tgm1          | chr10 |
| chr14 | 56225527  | 56402170  | chr14 | 56387928  | 56402856  | Adcy4         | chr10 |
| chr14 | 56225527  | 56402170  | chr14 | 56357856  | 56364521  | Dhrs1         | chr10 |
| chr14 | 64559302  | 64721752  | chr14 | 64712532  | 64716509  | Prss51        | chr10 |
| chr14 | 64559302  | 64721752  | chr14 | 64718131  | 64723072  | 4930471C04Rik | chr10 |
| chr14 | 64559302  | 64721752  | chr14 | 64562542  | 64569569  | Sox7          | chr11 |
| chr14 | 64559302  | 64721752  | chr14 | 64589958  | 64606617  | 4930578I06Rik | chr11 |
| chr14 | 64559302  | 64721752  | chr14 | 64694279  | 64704226  | Prss55        | chr11 |
| chr14 | 64559302  | 64721752  | chr14 | 64611267  | 64652343  | Rp11          | chr11 |
| chr14 | 69143016  | 69308618  | chr14 | 69115393  | 69151746  | Adam7         | chr11 |
| chr14 | 69143016  | 69308618  | chr14 | 69181443  | 69200129  | Adamdec1      | chr11 |
| chr14 | 69143016  | 69308618  | chr14 | 69223054  | 69273899  | Adam28        | chr11 |
| chr14 | 75276149  | 75428157  | chr14 | 75374892  | 75386911  | Gm4278        | chr11 |
| chr14 | 75276149  | 75428157  | chr14 | 75415833  | 75452339  | 5031414D18Rik | chr11 |
| chr14 | 75276149  | 75428157  | chr14 | 75154479  | 75347684  | Lrch1         | chr11 |
| chr14 | 77542724  | 77927582  | chr14 | 77879289  | 77906675  | Gm6994        | chr11 |
| chr14 | 77542724  | 77927582  | chr14 | 77556569  | 78121570  | Enox1         | chr11 |
| chr14 | 78007113  | 78305202  | chr14 | 78193751  | 78198775  | Gm1587        | chr11 |
| chr14 | 78007113  | 78305202  | chr14 | 78226023  | 78274724  | Dnajc15       | chr11 |
| chr14 | 78007113  | 78305202  | chr14 | 78304045  | 78402463  | Epsti1        | chr11 |
| chr14 | 78007113  | 78305202  | chr14 | 77556569  | 78121570  | Enox1         | chr11 |
| chr14 | 78504506  | 78938437  | chr14 | 78591179  | 78591285  | Mir1971       | chr11 |
| chr14 | 78504506  | 78938437  | chr14 | 78677252  | 78707850  | Tnfsf11       | chr11 |
| chr14 | 78504506  | 78938437  | chr14 | 78892052  | 78936667  | Akap11        | chr11 |
| chr14 | 103677594 | 103782196 | chr14 | 103512627 | 103746017 | Mycbp2        | chr11 |
| chr15 | 8056247   | 8160184   | chr15 | 8059312   | 8109859   | Nup155        | chr11 |
| chr15 | 8056247   | 8160184   | chr15 | 8119105   | 8221158   | 2410089E03Rik | chr11 |
| chr15 | 38221151  | 38465335  | chr15 | 38224167  | 38230462  | Klf10         | chr11 |
| chr15 | 38221151  | 38465335  | chr15 | 38420227  | 38420302  | Mir6951       | chr11 |
| chr15 | 38221151  | 38465335  | chr15 | 38417184  | 38449021  | Azin1         | chr11 |



|       |          |          |       |          |          |               |       |
|-------|----------|----------|-------|----------|----------|---------------|-------|
| chr15 | 55100081 | 55217547 | chr15 | 55139304 | 55352358 | Col14a1       | chr11 |
| chr15 | 59307660 | 59409305 | chr15 | 59205752 | 59433239 | Nsmce2        | chr11 |
| chr15 | 63260180 | 63409036 | chr15 | 63245951 | 63311163 | Gm20740       | chr11 |
| chr15 | 81196516 | 81445695 | chr15 | 81237517 | 81238703 | Dnajb7        | chr11 |
| chr15 | 81196516 | 81445695 | chr15 | 81195473 | 81230124 | St13          | chr11 |
| chr15 | 81196516 | 81445695 | chr15 | 81296745 | 81306799 | Rbx1          | chr11 |
| chr15 | 81196516 | 81445695 | chr15 | 81416643 | 81482507 | Ep300         | chr11 |
| chr15 | 81196516 | 81445695 | chr15 | 81230617 | 81285318 | Xpnpep3       | chr11 |
| chr15 | 83975652 | 84101420 | chr15 | 83998699 | 83998807 | Mir6392       | chr11 |
| chr15 | 83975652 | 84101420 | chr15 | 84022662 | 84044733 | Samm50        | chr11 |
| chr15 | 83975652 | 84101420 | chr15 | 84062472 | 84146039 | Parvb         | chr11 |
| chr15 | 83975652 | 84101420 | chr15 | 83998245 | 84019951 | Pnpla3        | chr11 |
| chr15 | 96152016 | 96314318 | chr15 | 96242128 | 96291274 | Scaf11        | chr11 |
| chr15 | 96152016 | 96314318 | chr15 | 96117952 | 96235894 | Arid2         | chr11 |
| chr15 | 96436911 | 96565468 | chr15 | 96517822 | 96530129 | Slc38a2       | chr11 |
| chr15 | 96436911 | 96565468 | chr15 | 96401848 | 96473344 | Slc38a1       | chr11 |
| chr16 | 13250628 | 13435260 | chr16 | 13256573 | 13417622 | Mkl2          | chr11 |
| chr16 | 13951302 | 14243889 | chr16 | 13981794 | 13986960 | Ifitm7        | chr11 |
| chr16 | 13951302 | 14243889 | chr16 | 14159718 | 14159785 | Mir484        | chr11 |
| chr16 | 13951302 | 14243889 | chr16 | 14163367 | 14193016 | Nde1          | chr11 |
| chr16 | 13951302 | 14243889 | chr16 | 13986729 | 14101587 | 2900011008Rik | chr11 |
| chr16 | 13951302 | 14243889 | chr16 | 14109258 | 14159367 | Marf1         | chr11 |
| chr16 | 13951302 | 14243889 | chr16 | 14194619 | 14291501 | Myh11         | chr11 |
| chr16 | 20123653 | 20463857 | chr16 | 20176222 | 20176307 | Mir684-1      | chr11 |
| chr16 | 20123653 | 20463857 | chr16 | 20097626 | 20127817 | Klhl24        | chr11 |
| chr16 | 20123653 | 20463857 | chr16 | 20233381 | 20241431 | Map6d1        | chr11 |
| chr16 | 20123653 | 20463857 | chr16 | 20279893 | 20302435 | Parl          | chr11 |
| chr16 | 20123653 | 20463857 | chr16 | 20331376 | 20426467 | Abcc5         | chr11 |
| chr16 | 20123653 | 20463857 | chr16 | 20141135 | 20232646 | Yeats2        | chr11 |
| chr16 | 20123653 | 20463857 | chr16 | 20308459 | 20325477 | Cyp2ab1       | chr11 |
| chr16 | 44722632 | 44963060 | chr16 | 44724413 | 44737397 | BC027231      | chr11 |
| chr16 | 44722632 | 44963060 | chr16 | 44738991 | 44746476 | Gtpbp8        | chr11 |
| chr16 | 44722632 | 44963060 | chr16 | 44765848 | 44795090 | Cd200r1       | chr11 |
| chr16 | 44722632 | 44963060 | chr16 | 44867209 | 44915953 | Cd200r2       | chr11 |
| chr16 | 44722632 | 44963060 | chr16 | 44820840 | 44839263 | Cd200r4       | chr11 |
| chr16 | 44722632 | 44963060 | chr16 | 44943790 | 44981493 | Cd200r3       | chr11 |
| chr16 | 57608953 | 57727350 | chr16 | 57624368 | 57754850 | Col8a1        | chr11 |
| chr17 | 35707671 | 35959220 | chr17 | 35754867 | 35763582 | Gm9573        | chr11 |
| chr17 | 35707671 | 35959220 | chr17 | 35772699 | 35780640 | Dpcr1         | chr11 |
| chr17 | 35707671 | 35959220 | chr17 | 35786652 | 35787514 | Sfta2         | chr11 |
| chr17 | 35707671 | 35959220 | chr17 | 35804683 | 35810627 | Gtf2h4        | chr11 |
| chr17 | 35707671 | 35959220 | chr17 | 35958657 | 35959856 | Ier3          | chr11 |
| chr17 | 35707671 | 35959220 | chr17 | 35792579 | 35804537 | Vars2         | chr11 |
| chr17 | 35707671 | 35959220 | chr17 | 35818511 | 35841084 | Ddr1          | chr11 |
| chr17 | 35707671 | 35959220 | chr17 | 35909394 | 35917632 | 4833427F10Rik | chr11 |
| chr17 | 47885492 | 48010385 | chr17 | 47873985 | 47929365 | Tfeb          | chr11 |
| chr17 | 47885492 | 48010385 | chr17 | 47952276 | 47971640 | Mdfi          | chr11 |

|       |           |           |       |           |           |               |       |
|-------|-----------|-----------|-------|-----------|-----------|---------------|-------|
| chr17 | 47885492  | 48010385  | chr17 | 48004081  | 48061581  | Foxp4         | chr11 |
| chr17 | 71508766  | 71692938  | chr17 | 71682540  | 71691144  | Gm4566        | chr11 |
| chr17 | 71508766  | 71692938  | chr17 | 71601515  | 71660305  | Emilin2       | chr11 |
| chr17 | 71508766  | 71692938  | chr17 | 71533317  | 71599158  | Lpin2         | chr11 |
| chr18 | 53918269  | 54161485  | chr18 | 54021766  | 54115338  | Csnk1g3       | chr11 |
| chr18 | 55110060  | 55239749  | chr18 | 55047698  | 55149834  | Zfp608        | chr11 |
| chr18 | 67416915  | 67573041  | chr18 | 67448876  | 67478495  | Impa2         | chr11 |
| chr18 | 67416915  | 67573041  | chr18 | 67503217  | 67527448  | Cidea         | chr11 |
| chr18 | 67416915  | 67573041  | chr18 | 67550384  | 67562403  | Tubb6         | chr11 |
| chr18 | 67416915  | 67573041  | chr18 | 67564417  | 67608790  | Afg3l2        | chr11 |
| chr18 | 67416915  | 67573041  | chr18 | 67480862  | 67503757  | B430212C06Rik | chr11 |
| chr18 | 75923677  | 76045668  | chr18 | 75979831  | 76308218  | Zbtb7c        | chr11 |
| chr18 | 77236742  | 77378097  | chr18 | 77231938  | 77286035  | Katnal2       | chr11 |
| chr18 | 77236742  | 77378097  | chr18 | 77303946  | 77394447  | Pias2         | chr11 |
| chr19 | 22990389  | 23357111  | chr19 | 23223920  | 23224041  | Mir1192       | chr11 |
| chr19 | 22990389  | 23357111  | chr19 | 23215715  | 23241401  | Klf9          | chr11 |
| chr19 | 22990389  | 23357111  | chr19 | 22213606  | 23064374  | Trpm3         | chr11 |
| chr19 | 22990389  | 23357111  | chr19 | 23280930  | 23348387  | Smc5          | chr11 |
| chr19 | 28369153  | 28731108  | chr19 | 28336937  | 28754567  | Glis3         | chr11 |
| chr19 | 57644045  | 57797605  | chr19 | 57685523  | 58207830  | Atrnl1        | chr11 |
| chr19 | 58976390  | 59117833  | chr19 | 58986162  | 58986249  | Mir3086       | chr11 |
| chr19 | 58976390  | 59117833  | chr19 | 59017914  | 59045911  | Eno4          | chr11 |
| chr19 | 58976390  | 59117833  | chr19 | 59047847  | 59150559  | 4930506M07Rik | chr11 |
| chr2  | 13225793  | 13411693  | chr2  | 13197964  | 13413503  | Cubn          | chr11 |
| chr2  | 29082657  | 29270519  | chr2  | 29100635  | 29108513  | 6530402F18Rik | chr11 |
| chr2  | 29082657  | 29270519  | chr2  | 29050340  | 29103560  | Ntng2         | chr11 |
| chr2  | 29082657  | 29270519  | chr2  | 29202355  | 29380308  | Med27         | chr11 |
| chr2  | 49586065  | 49792385  | chr2  | 49474833  | 49630298  | Kif5c         | chr11 |
| chr2  | 49586065  | 49792385  | chr2  | 49643205  | 49804366  | Lypd6b        | chr11 |
| chr2  | 114428844 | 115119711 | chr2  | 114342153 | 114480664 | Dph6          | chr11 |
| chr2  | 115268999 | 115375728 | chr2  | 115319248 | 115337937 | 3110099E03Rik | chr11 |
| chr2  | 116803457 | 117069805 | chr2  | 117010862 | 117010962 | Mir674        | chr11 |
| chr2  | 116803457 | 117069805 | chr2  | 116946806 | 117008013 | Spred1        | chr11 |
| chr2  | 134749341 | 134926144 | chr2  | 134611899 | 135300994 | Plcb1         | chr11 |
| chr2  | 140839297 | 141245969 | chr2  | 140221165 | 142215786 | MacroD2       | chr11 |
| chr2  | 164733268 | 165091664 | chr2  | 164717391 | 164737250 | Zfp335        | chr11 |
| chr2  | 164733268 | 165091664 | chr2  | 164773718 | 164781349 | Mmp9          | chr11 |
| chr2  | 164733268 | 165091664 | chr2  | 164793487 | 164825231 | Slc12a5       | chr11 |
| chr2  | 164733268 | 165091664 | chr2  | 164825856 | 164860279 | Ncoa5         | chr11 |
| chr2  | 164733268 | 165091664 | chr2  | 164904192 | 164916250 | 1700025C18Rik | chr11 |
| chr2  | 164733268 | 165091664 | chr2  | 164881135 | 164897154 | Cd40          | chr11 |
| chr2  | 164733268 | 165091664 | chr2  | 164937006 | 165060237 | Cdh22         | chr11 |
| chr2  | 168134864 | 168389073 | chr2  | 168301909 | 168427155 | Nfatc2        | chr11 |
| chr3  | 37723507  | 37929606  | chr3  | 37797734  | 37891650  | Gm20755       | chr11 |
| chr3  | 54949157  | 55077339  | chr3  | 54943959  | 54976857  | Ccdc169       | chr11 |
| chr3  | 54949157  | 55077339  | chr3  | 54985965  | 55013879  | Sohlh2        | chr11 |
| chr3  | 54949157  | 55077339  | chr3  | 55046447  | 55342990  | Dclk1         | chr11 |

|      |           |           |      |           |           |               |  |       |
|------|-----------|-----------|------|-----------|-----------|---------------|--|-------|
| chr3 | 96492870  | 96653349  | chr3 | 96509814  | 96512483  | Nudt17        |  | chr11 |
| chr3 | 96492870  | 96653349  | chr3 | 96633748  | 96635993  | 4930442L01Rik |  | chr11 |
| chr3 | 96492870  | 96653349  | chr3 | 96474053  | 96494957  | Ankrd35       |  | chr11 |
| chr3 | 96492870  | 96653349  | chr3 | 96500297  | 96509993  | Pias3         |  | chr11 |
| chr3 | 96492870  | 96653349  | chr3 | 96515817  | 96531362  | Polr3c        |  | chr11 |
| chr3 | 96492870  | 96653349  | chr3 | 96531533  | 96595078  | Rnf115        |  | chr11 |
| chr3 | 96492870  | 96653349  | chr3 | 96602685  | 96633274  | Cd160         |  | chr11 |
| chr3 | 96492870  | 96653349  | chr3 | 96633987  | 96674849  | Pdzk1         |  | chr11 |
| chr3 | 101358705 | 101469409 | chr3 | 101380141 | 101408630 | Atp1a1        |  | chr11 |
| chr3 | 103392368 | 103614401 | chr3 | 103539316 | 103541924 | Olfml3        |  | chr11 |
| chr3 | 103392368 | 103614401 | chr3 | 103607051 | 103612363 | Gm15471       |  | chr11 |
| chr3 | 103392368 | 103614401 | chr3 | 103613439 | 103625948 | Ap4b1         |  | chr11 |
| chr3 | 103392368 | 103614401 | chr3 | 103604527 | 103613310 | Dclre1b       |  | chr11 |
| chr3 | 103392368 | 103614401 | chr3 | 103379204 | 103449490 | Syt6          |  | chr11 |
| chr3 | 103392368 | 103614401 | chr3 | 103543737 | 103595198 | Hipk1         |  | chr11 |
| chr3 | 108580713 | 108754722 | chr3 | 108542575 | 108585227 | Aknad1        |  | chr11 |
| chr3 | 108580713 | 108754722 | chr3 | 108596097 | 108643420 | Stxbp3a       |  | chr11 |
| chr3 | 108580713 | 108754722 | chr3 | 108705724 | 108714622 | Prpf38b       |  | chr11 |
| chr3 | 108580713 | 108754722 | chr3 | 108743001 | 108763694 | Henmt1        |  | chr11 |
| chr3 | 108580713 | 108754722 | chr3 | 108656595 | 108692926 | Fndc7         |  | chr11 |
| chr3 | 126064271 | 126183717 | chr3 | 126066769 | 126143292 | Arsj          |  | chr11 |
| chr3 | 126698409 | 126825825 | chr3 | 126624524 | 126701370 | Ank2          |  | chr11 |
| chr3 | 143234864 | 143499185 | chr3 | 143333855 | 143375107 | Gm6260        |  | chr11 |
| chr3 | 151949830 | 152144245 | chr3 | 151936423 | 152003371 | Fam73a        |  | chr11 |
| chr3 | 151949830 | 152144245 | chr3 | 152058966 | 152125790 | Zzz3          |  | chr11 |
| chr3 | 151949830 | 152144245 | chr3 | 152125778 | 152331104 | Ak5           |  | chr11 |
| chr3 | 151949830 | 152144245 | chr3 | 152009441 | 152056578 | Usp33         |  | chr11 |
| chr3 | 154224626 | 154385329 | chr3 | 154239483 | 154260062 | Tyw3          |  | chr11 |
| chr3 | 154224626 | 154385329 | chr3 | 154259674 | 154286146 | Cryz          |  | chr11 |
| chr3 | 154224626 | 154385329 | chr3 | 154374096 | 154411976 | 4922501L14Rik |  | chr11 |
| chr4 | 10847691  | 11051530  | chr4 | 10915808  | 10934766  | Plekhf2       |  | chr11 |
| chr4 | 10847691  | 11051530  | chr4 | 10978194  | 11003352  | Ndufaf6       |  | chr11 |
| chr4 | 44942991  | 45068674  | chr4 | 44994282  | 45003568  | Grhpr         |  | chr11 |
| chr4 | 44942991  | 45068674  | chr4 | 45004114  | 45025284  | Zbtb5         |  | chr11 |
| chr4 | 44942991  | 45068674  | chr4 | 45031480  | 45047151  | Polr1e        |  | chr11 |
| chr4 | 44942991  | 45068674  | chr4 | 44769430  | 44945086  | Zcchc7        |  | chr11 |
| chr4 | 44942991  | 45068674  | chr4 | 45047119  | 45097476  | Fbxo10        |  | chr11 |
| chr4 | 47181592  | 47416932  | chr4 | 47366176  | 47427796  | Tgfbr1        |  | chr11 |
| chr4 | 47181592  | 47416932  | chr4 | 47220883  | 47326037  | Col15a1       |  | chr11 |
| chr4 | 54837629  | 55117736  | chr4 | 54960816  | 55096435  | Zfp462        |  | chr11 |
| chr4 | 120242048 | 120368019 | chr4 | 120339167 | 120340425 | Cited4        |  | chr11 |
| chr4 | 120242048 | 120368019 | chr4 | 120212472 | 120242881 | Ctps          |  | chr11 |
| chr4 | 120242048 | 120368019 | chr4 | 120261349 | 120282277 | Gm8439        |  | chr11 |
| chr4 | 120635896 | 120759860 | chr4 | 120645863 | 120645927 | Mir7015       |  | chr11 |
| chr4 | 120635896 | 120759860 | chr4 | 120640921 | 120689852 | Smap2         |  | chr11 |
| chr4 | 120635896 | 120759860 | chr4 | 120731842 | 120770848 | Zmpste24      |  | chr11 |
| chr4 | 120635896 | 120759860 | chr4 | 120712170 | 120727930 | Col9a2        |  | chr11 |

|      |           |           |      |           |           |               |       |
|------|-----------|-----------|------|-----------|-----------|---------------|-------|
| chr4 | 127692307 | 127818782 | chr4 | 127810766 | 127844211 | Csmd2os       | chr11 |
| chr4 | 127692307 | 127818782 | chr4 | 127665287 | 128244900 | Csmd2         | chr11 |
| chr4 | 150880805 | 151016739 | chr4 | 150433631 | 151235877 | Camta1        | chr11 |
| chr4 | 153267179 | 153465979 | chr4 | 153322563 | 153324585 | BC039966      | chr11 |
| chr4 | 153267179 | 153465979 | chr4 | 153331345 | 153336033 | A430005L14Rik | chr11 |
| chr4 | 153267179 | 153465979 | chr4 | 153338557 | 153349190 | Dffb          | chr11 |
| chr4 | 153267179 | 153465979 | chr4 | 153394578 | 153400153 | Smim1         | chr11 |
| chr4 | 153267179 | 153465979 | chr4 | 153385911 | 153395621 | Lrrc47        | chr11 |
| chr4 | 153267179 | 153465979 | chr4 | 153400752 | 153416786 | Ccdc27        | chr11 |
| chr4 | 153267179 | 153465979 | chr4 | 153349669 | 153381334 | Cep104        | chr11 |
| chr4 | 153267179 | 153465979 | chr4 | 153430357 | 153514317 | Trp73         | chr11 |
| chr5 | 24731038  | 24978670  | chr5 | 24728710  | 24771736  | Galnt11       | chr11 |
| chr5 | 24731038  | 24978670  | chr5 | 24777611  | 25004601  | Kmt2c         | chr11 |
| chr5 | 99712307  | 99872404  | chr5 | 99726262  | 100158079 | A930011G23Rik | chr11 |
| chr5 | 102950085 | 103057952 | chr5 | 102910409 | 103326956 | Arhgap24      | chr11 |
| chr5 | 150394440 | 150617368 | chr5 | 150604564 | 150614326 | Gm21221       | chr11 |
| chr5 | 150394440 | 150617368 | chr5 | 150419419 | 150438890 | Hsph1         | chr11 |
| chr5 | 150394440 | 150617368 | chr5 | 150480831 | 150565174 | B3galtl       | chr11 |
| chr5 | 150394440 | 150617368 | chr5 | 150331253 | 150414469 | Wdr95         | chr11 |
| chr5 | 151934110 | 152097110 | chr5 | 151840089 | 151992768 | Stard13       | chr11 |
| chr7 | 52149061  | 52283474  | chr7 | 52151448  | 52155994  | Fuz           | chr11 |
| chr7 | 52149061  | 52283474  | chr7 | 52253017  | 52258218  | Irf3          | chr11 |
| chr7 | 52149061  | 52283474  | chr7 | 52267795  | 52267857  | Mir7054       | chr11 |
| chr7 | 52149061  | 52283474  | chr7 | 52273376  | 52277014  | Rras          | chr11 |
| chr7 | 52149061  | 52283474  | chr7 | 52198609  | 52213405  | Tsks          | chr11 |
| chr7 | 52149061  | 52283474  | chr7 | 52214741  | 52230221  | Cpt1c         | chr11 |
| chr7 | 52149061  | 52283474  | chr7 | 52232124  | 52241790  | Prmt1         | chr11 |
| chr7 | 52149061  | 52283474  | chr7 | 52242269  | 52249971  | Gm15545       | chr11 |
| chr7 | 52149061  | 52283474  | chr7 | 52246591  | 52252949  | Bcl2l12       | chr11 |
| chr7 | 52149061  | 52283474  | chr7 | 52258319  | 52271619  | Scaf1         | chr11 |
| chr7 | 52149061  | 52283474  | chr7 | 52155742  | 52184860  | Ap2a1         | chr11 |
| chr7 | 52149061  | 52283474  | chr7 | 52283076  | 52308251  | Prr12         | chr11 |
| chr7 | 73871159  | 73988290  | chr7 | 73888389  | 73968578  | Cers3         | chr11 |
| chr7 | 73871159  | 73988290  | chr7 | 73984620  | 74297511  | Adamts17      | chr11 |
| chr7 | 82536944  | 82653678  | chr7 | 82600419  | 82899495  | Akap13        | chr11 |
| chr7 | 87870426  | 88349848  | chr7 | 88035608  | 88046155  | Wdr73         | chr11 |
| chr7 | 87870426  | 88349848  | chr7 | 87856468  | 87948217  | Iqgap1        | chr11 |
| chr7 | 87870426  | 88349848  | chr7 | 88006993  | 88021399  | Zscan2        | chr11 |
| chr7 | 87870426  | 88349848  | chr7 | 88047112  | 88049957  | Nmb           | chr11 |
| chr7 | 87870426  | 88349848  | chr7 | 88138569  | 88190048  | Zfp592        | chr11 |
| chr7 | 87870426  | 88349848  | chr7 | 88259684  | 88315302  | Slc28a1       | chr11 |
| chr7 | 87870426  | 88349848  | chr7 | 88202485  | 88250498  | Alpk3         | chr11 |
| chr7 | 87870426  | 88349848  | chr7 | 88060264  | 88092436  | Sec11a        | chr11 |
| chr7 | 104655480 | 104895159 | chr7 | 104874888 | 104886757 | Aqp11         | chr11 |
| chr7 | 104655480 | 104895159 | chr7 | 104629465 | 104689908 | Ints4         | chr11 |
| chr7 | 104655480 | 104895159 | chr7 | 104728405 | 104841292 | Rsf1          | chr11 |
| chr7 | 104655480 | 104895159 | chr7 | 104698840 | 104728007 | Aamd          | chr11 |

|      |           |           |      |           |           |               |       |
|------|-----------|-----------|------|-----------|-----------|---------------|-------|
| chr7 | 104655480 | 104895159 | chr7 | 104845166 | 104869303 | Clns1a        | chr11 |
| chr7 | 108325904 | 108511018 | chr7 | 108438129 | 108450602 | Atg16l2       | chr11 |
| chr7 | 108325904 | 108511018 | chr7 | 108469832 | 108494826 | Stard10       | chr11 |
| chr7 | 108325904 | 108511018 | chr7 | 108257288 | 108432919 | Fchs2         | chr11 |
| chr7 | 108325904 | 108511018 | chr7 | 108496582 | 108561100 | Arap1         | chr11 |
| chr7 | 150390765 | 150506689 | chr7 | 150293158 | 150612947 | Kcnq1         | chr11 |
| chr7 | 150390765 | 150506689 | chr7 | 150399015 | 150482452 | Kcnq1ot1      | chr11 |
| chr7 | 150974900 | 151376534 | chr7 | 151119019 | 151119113 | Mir6404       | chr11 |
| chr7 | 150974900 | 151376534 | chr7 | 151009071 | 151034315 | Dhcr7         | chr11 |
| chr7 | 150974900 | 151376534 | chr7 | 151361424 | 151608580 | Shank2        | chr11 |
| chr7 | 150974900 | 151376534 | chr7 | 150981498 | 151008746 | Nadsyn1       | chr11 |
| chr8 | 12572475  | 12711366  | chr8 | 12614276  | 12672100  | Tubgcp3       | chr11 |
| chr8 | 12572475  | 12711366  | chr8 | 12706943  | 12719127  | Gm15348       | chr11 |
| chr8 | 12572475  | 12711366  | chr8 | 12573048  | 12600738  | Spaca7        | chr11 |
| chr8 | 64052482  | 64196923  | chr8 | 63993819  | 64381487  | Palld         | chr11 |
| chr8 | 74489305  | 74679371  | chr8 | 74581558  | 74582574  | Olfr372       | chr11 |
| chr8 | 74489305  | 74679371  | chr8 | 74623660  | 74624605  | Olfr373       | chr11 |
| chr8 | 74489305  | 74679371  | chr8 | 74630938  | 74634408  | Olfr374       | chr11 |
| chr8 | 74489305  | 74679371  | chr8 | 74474964  | 74494232  | Zfp961        | chr11 |
| chr8 | 74489305  | 74679371  | chr8 | 74512380  | 74533525  | Cyp4f18       | chr11 |
| chr8 | 74489305  | 74679371  | chr8 | 74659190  | 74677028  | Tpm4          | chr11 |
| chr8 | 80065033  | 80194154  | chr8 | 80119878  | 80134552  | Tmem184c      | chr11 |
| chr8 | 80065033  | 80194154  | chr8 | 80148070  | 80152855  | 1700092C02Rik | chr11 |
| chr8 | 80065033  | 80194154  | chr8 | 80073295  | 80105237  | Prmt10        | chr11 |
| chr8 | 80065033  | 80194154  | chr8 | 80186927  | 80248351  | Ednra         | chr11 |
| chr8 | 85884309  | 86002375  | chr8 | 85872370  | 85903301  | 4933434I20Rik | chr11 |
| chr8 | 85884309  | 86002375  | chr8 | 85913789  | 85950728  | Clgn          | chr11 |
| chr8 | 85884309  | 86002375  | chr8 | 85958390  | 85982295  | Scoc          | chr11 |
| chr8 | 87802613  | 88112535  | chr8 | 87823530  | 87832178  | Orc6          | chr11 |
| chr8 | 87802613  | 88112535  | chr8 | 87848827  | 87889223  | Mylk3         | chr11 |
| chr8 | 87802613  | 88112535  | chr8 | 88016515  | 88051457  | Gpt2          | chr11 |
| chr8 | 87802613  | 88112535  | chr8 | 88061538  | 88079170  | Dnaja2        | chr11 |
| chr8 | 87802613  | 88112535  | chr8 | 87784290  | 87823396  | Vps35         | chr11 |
| chr8 | 87802613  | 88112535  | chr8 | 87932657  | 87956740  | 4921524J17Rik | chr11 |
| chr8 | 95654413  | 95954634  | chr8 | 95622914  | 95655182  | Ces1c         | chr11 |
| chr8 | 95654413  | 95954634  | chr8 | 95689970  | 95721703  | Ces1d         | chr11 |
| chr8 | 95654413  | 95954634  | chr8 | 95725116  | 95753518  | Ces1e         | chr11 |
| chr8 | 95654413  | 95954634  | chr8 | 95780134  | 95803635  | Ces1f         | chr11 |
| chr8 | 95654413  | 95954634  | chr8 | 95826267  | 95861108  | Ces1g         | chr11 |
| chr8 | 105669463 | 106018568 | chr8 | 105867777 | 105871434 | 1600027J07Rik | chr11 |
| chr8 | 112130724 | 112276085 | chr8 | 112250350 | 112261639 | Atxn1l        | chr11 |
| chr8 | 112130724 | 112276085 | chr8 | 112117147 | 112132573 | Dhodh         | chr11 |
| chr8 | 112130724 | 112276085 | chr8 | 112138416 | 112196492 | Pkd1l3        | chr11 |
| chr8 | 112130724 | 112276085 | chr8 | 112229445 | 112248832 | Zfp821        | chr11 |
| chr8 | 112130724 | 112276085 | chr8 | 112195220 | 112217194 | Ist1          | chr11 |
| chr9 | 30951723  | 31122632  | chr9 | 30957141  | 31019400  | Aplp2         | chr11 |
| chr9 | 30951723  | 31122632  | chr9 | 31078985  | 31082970  | Gm7244        | chr11 |

|      |           |           |      |           |           |               |  |       |
|------|-----------|-----------|------|-----------|-----------|---------------|--|-------|
| chr9 | 30951723  | 31122632  | chr9 | 30942991  | 31066970  | Mir3471-1     |  | chr11 |
| chr9 | 41161065  | 41418678  | chr9 | 41339507  | 41339587  | Mir100        |  | chr11 |
| chr9 | 41161065  | 41418678  | chr9 | 41344798  | 41344894  | Mirlet7a-2    |  | chr11 |
| chr9 | 41161065  | 41418678  | chr9 | 41389421  | 41400570  | 2610203C20Rik |  | chr11 |
| chr9 | 41161065  | 41418678  | chr9 | 41390008  | 41390085  | Mir125b-1     |  | chr11 |
| chr9 | 41161065  | 41418678  | chr9 | 41184643  | 41240162  | 3110039I08Rik |  | chr11 |
| chr9 | 83194263  | 83325679  | chr9 | 83284961  | 83334734  | Lca5          |  | chr11 |
| chr9 | 83194263  | 83325679  | chr9 | 83325153  | 83348181  | Gm2087        |  | chr11 |
| chr9 | 85177548  | 85374479  | chr9 | 85214045  | 85220757  | Fam46a        |  | chr11 |
| chr9 | 106059070 | 106354720 | chr9 | 106055190 | 106060469 | Glyctk        |  | chr11 |
| chr9 | 106059070 | 106354720 | chr9 | 106081170 | 106081258 | Mirlet7g      |  | chr11 |
| chr9 | 106059070 | 106354720 | chr9 | 106097283 | 106101564 | Ppm1m         |  | chr11 |
| chr9 | 106059070 | 106354720 | chr9 | 106105438 | 106117718 | Twf2          |  | chr11 |
| chr9 | 106059070 | 106354720 | chr9 | 106124928 | 106129207 | Tlr9          |  | chr11 |
| chr9 | 106059070 | 106354720 | chr9 | 106135785 | 106150285 | Alas1         |  | chr11 |
| chr9 | 106059070 | 106354720 | chr9 | 106270962 | 106278054 | Dusp7         |  | chr11 |
| chr9 | 106059070 | 106354720 | chr9 | 106335311 | 106340567 | Acy1          |  | chr11 |
| chr9 | 106059070 | 106354720 | chr9 | 106350970 | 106355249 | Abhd14b       |  | chr11 |
| chr9 | 106059070 | 106354720 | chr9 | 106073259 | 106094037 | Wdr82         |  | chr11 |
| chr9 | 106059070 | 106354720 | chr9 | 106183391 | 106252222 | Poc1a         |  | chr11 |
| chr9 | 106059070 | 106354720 | chr9 | 106331869 | 106333898 | Rpl29         |  | chr11 |
| chr9 | 106059070 | 106354720 | chr9 | 106342381 | 106350009 | Abhd14a       |  | chr11 |
| chr9 | 117121490 | 117375098 | chr9 | 116481863 | 117539031 | Rbms3         |  | chr11 |
| chr9 | 119182559 | 119372737 | chr9 | 119245105 | 119249158 | Myd88         |  | chr11 |
| chr9 | 119182559 | 119372737 | chr9 | 119147550 | 119231545 | Oxsr1         |  | chr11 |
| chr9 | 119182559 | 119372737 | chr9 | 119250411 | 119259413 | Acaa1a        |  | chr12 |
| chr9 | 119182559 | 119372737 | chr9 | 119311618 | 119342624 | Acvr2b        |  | chr12 |
| chr9 | 119182559 | 119372737 | chr9 | 119354040 | 119374636 | Exog          |  | chr12 |
| chr9 | 119182559 | 119372737 | chr9 | 119266498 | 119302915 | Xylb          |  | chr12 |
| chrX | 5868986   | 6099097   | chrX | 5891223   | 5897841   | Bmp15         |  | chr12 |
| chrX | 5868986   | 6099097   | chrX | 6029493   | 6151781   | 5430428K19Rik |  | chr12 |
| chrX | 5868986   | 6099097   | chrX | 5977262   | 6210835   | Shroom4       |  | chr12 |
| chrX | 6788093   | 7065287   | chrX | 6814808   | 6814900   | Mir500        |  | chr12 |
| chrX | 6788093   | 7065287   | chrX | 6818368   | 6818477   | Mir501        |  | chr12 |
| chrX | 6788093   | 7065287   | chrX | 6819108   | 6819172   | Mir362        |  | chr12 |
| chrX | 6788093   | 7065287   | chrX | 6825114   | 6825182   | Mir188        |  | chr12 |
| chrX | 6788093   | 7065287   | chrX | 6825527   | 6825623   | Mir532        |  | chr12 |
| chrX | 6788093   | 7065287   | chrX | 6949716   | 6952956   | Usp27x        |  | chr12 |
| chrX | 6788093   | 7065287   | chrX | 6953050   | 6955168   | Gm14379       |  | chr12 |
| chrX | 6788093   | 7065287   | chrX | 6988942   | 7000114   | 2010204K13Rik |  | chr12 |
| chrX | 6788093   | 7065287   | chrX | 6735537   | 6896484   | Clcn5         |  | chr12 |
| chrX | 7689684   | 7847352   | chrX | 7722552   | 7725089   | Rbm3os        |  | chr12 |
| chrX | 7689684   | 7847352   | chrX | 7815793   | 7829532   | Ftsj1         |  | chr12 |
| chrX | 7689684   | 7847352   | chrX | 7700426   | 7709984   | Wdr13         |  | chr12 |
| chrX | 7689684   | 7847352   | chrX | 7716100   | 7722928   | Rbm3          |  | chr12 |
| chrX | 7689684   | 7847352   | chrX | 7762456   | 7770638   | Ebp           |  | chr12 |
| chrX | 7689684   | 7847352   | chrX | 7770975   | 7783651   | Porcn         |  | chr12 |

|      |          |          |      |          |          |               |  |       |
|------|----------|----------|------|----------|----------|---------------|--|-------|
| chrX | 7689684  | 7847352  | chrX | 7731597  | 7753307  | Tbc1d25       |  | chr12 |
| chrX | 9410889  | 9886154  | chrX | 9424072  | 9424626  | 1700054O13Rik |  | chr12 |
| chrX | 9410889  | 9886154  | chrX | 9426828  | 9427378  | 4930557A04Rik |  | chr12 |
| chrX | 9410889  | 9886154  | chrX | 9615102  | 9694787  | Srpx          |  | chr12 |
| chrX | 9410889  | 9886154  | chrX | 9735341  | 9793921  | Rpgr          |  | chr12 |
| chrX | 9410889  | 9886154  | chrX | 9462747  | 9571669  | Sytl5         |  | chr12 |
| chrX | 9410889  | 9886154  | chrX | 9829484  | 9898150  | Otc           |  | chr12 |
| chrX | 10675028 | 11258227 | chrX | 10876382 | 10876883 | Gm14483       |  | chr12 |
| chrX | 10675028 | 11258227 | chrX | 10876446 | 10876764 | Gm14475       |  | chr12 |
| chrX | 10675028 | 11258227 | chrX | 10876446 | 10876764 | Gm14476       |  | chr12 |
| chrX | 10675028 | 11258227 | chrX | 10876446 | 10876764 | Gm14477       |  | chr12 |
| chrX | 10675028 | 11258227 | chrX | 10876446 | 10876764 | Gm14479       |  | chr12 |
| chrX | 10675028 | 11258227 | chrX | 10879557 | 10880047 | Gm14474       |  | chr12 |
| chrX | 10675028 | 11258227 | chrX | 10882780 | 10883098 | Gm14475       |  | chr12 |
| chrX | 10675028 | 11258227 | chrX | 10882780 | 10883098 | Gm14476       |  | chr12 |
| chrX | 10675028 | 11258227 | chrX | 10882780 | 10883098 | Gm14477       |  | chr12 |
| chrX | 10675028 | 11258227 | chrX | 10882780 | 10883098 | Gm14479       |  | chr12 |
| chrX | 10675028 | 11258227 | chrX | 10885880 | 10886389 | Gm14482       |  | chr12 |
| chrX | 10675028 | 11258227 | chrX | 10885885 | 10886386 | Gm14483       |  | chr12 |
| chrX | 10675028 | 11258227 | chrX | 10885949 | 10886267 | Gm14475       |  | chr12 |
| chrX | 10675028 | 11258227 | chrX | 10885949 | 10886267 | Gm14476       |  | chr12 |
| chrX | 10675028 | 11258227 | chrX | 10885949 | 10886267 | Gm14477       |  | chr12 |
| chrX | 10675028 | 11258227 | chrX | 10885949 | 10886267 | Gm14479       |  | chr12 |
| chrX | 10675028 | 11258227 | chrX | 10889059 | 10889553 | Gm14484       |  | chr12 |
| chrX | 10675028 | 11258227 | chrX | 10892214 | 10892723 | Gm14482       |  | chr12 |
| chrX | 10675028 | 11258227 | chrX | 10892283 | 10892601 | Gm14475       |  | chr12 |
| chrX | 10675028 | 11258227 | chrX | 10892283 | 10892601 | Gm14476       |  | chr12 |
| chrX | 10675028 | 11258227 | chrX | 10892283 | 10892601 | Gm14477       |  | chr12 |
| chrX | 10675028 | 11258227 | chrX | 10892283 | 10892601 | Gm14479       |  | chr12 |
| chrX | 10675028 | 11258227 | chrX | 10895381 | 10895890 | Gm14482       |  | chr12 |
| chrX | 10675028 | 11258227 | chrX | 10895411 | 10895853 | Gm14478       |  | chr12 |
| chrX | 10675028 | 11258227 | chrX | 10895450 | 10895768 | Gm14475       |  | chr12 |
| chrX | 10675028 | 11258227 | chrX | 10895450 | 10895768 | Gm14476       |  | chr12 |
| chrX | 10675028 | 11258227 | chrX | 10895450 | 10895768 | Gm14477       |  | chr12 |
| chrX | 10675028 | 11258227 | chrX | 10895450 | 10895768 | Gm14479       |  | chr12 |
| chrX | 10675028 | 11258227 | chrX | 10898548 | 10899057 | Gm14482       |  | chr12 |
| chrX | 10675028 | 11258227 | chrX | 10898578 | 10899020 | Gm14478       |  | chr12 |
| chrX | 10675028 | 11258227 | chrX | 10898617 | 10898935 | Gm14475       |  | chr12 |
| chrX | 10675028 | 11258227 | chrX | 10898617 | 10898935 | Gm14476       |  | chr12 |
| chrX | 10675028 | 11258227 | chrX | 10898617 | 10898935 | Gm14477       |  | chr12 |
| chrX | 10675028 | 11258227 | chrX | 10898617 | 10898935 | Gm14479       |  | chr12 |
| chrX | 10675028 | 11258227 | chrX | 10901784 | 10902102 | Gm14475       |  | chr12 |
| chrX | 10675028 | 11258227 | chrX | 10901784 | 10902102 | Gm14476       |  | chr12 |
| chrX | 10675028 | 11258227 | chrX | 10901784 | 10902102 | Gm14477       |  | chr13 |
| chrX | 10675028 | 11258227 | chrX | 10901784 | 10902102 | Gm14479       |  | chr13 |
| chrX | 10675028 | 11258227 | chrX | 10904947 | 10905277 | Gm4906        |  | chr13 |
| chrX | 11332371 | 11646195 | chrX | 11613863 | 11737481 | Bcor          |  | chr13 |





































































**Stable****c genes**

|           |           |       |           |           |               |
|-----------|-----------|-------|-----------|-----------|---------------|
| 97118018  | 97338198  | chr11 | 97223864  | 97259856  | Socs7         |
| 98567254  | 101484115 | chr15 | 98602182  | 98608581  | Wnt10b        |
| 98567254  | 101484115 | chr15 | 98620287  | 98624261  | Wnt1          |
| 103046339 | 103369550 | chr15 | 103144325 | 103170517 | Zfp385a       |
| 25932014  | 26515103  | chr17 | 26275630  | 26332756  | Axin1         |
| 27898539  | 29315727  | chr17 | 28369698  | 28438414  | Ppard         |
| 3316144   | 3771890   | chr19 | 3584824   | 3686564   | Lrp5          |
| 3942471   | 5513101   | chr19 | 5453162   | 5457563   | Ccdc85b       |
| 43970768  | 44674206  | chr19 | 44468939  | 44482199  | Scd1          |
| 55872793  | 56518841  | chr19 | 55816299  | 56008145  | Tcf7l2        |
| 56625260  | 57324398  | chr19 | 56796861  | 56799352  | Adrb1         |
| 167047927 | 167738418 | chr2  | 167514414 | 167515932 | Cebpb         |
| 33505245  | 33788043  | chr5  | 33590371  | 33617653  | Ctbp1         |
| 135763012 | 137098567 | chr5  | 136694018 | 136720773 | Sh2b2         |
| 139783547 | 139986582 | chr5  | 139899132 | 139903754 | Gper1         |
| 152118109 | 152521388 | chr7  | 152115835 | 152125830 | Ccnd1         |
| 124860631 | 125265544 | chr8  | 124806040 | 124861147 | Zfpm1         |
| 40250631  | 40378274  | chr1  | 40281924  | 40373022  | Il1r1         |
| 92104722  | 92814033  | chr1  | 92100554  | 92112297  | Ackr3         |
| 92104722  | 92814033  | chr1  | 92499999  | 92509916  | Cops8         |
| 92104722  | 92814033  | chr1  | 92811676  | 92847719  | Mlph          |
| 92104722  | 92814033  | chr1  | 92663434  | 92740548  | Col6a3        |
| 137203852 | 137618492 | chr1  | 137268032 | 137271640 | Shisa4        |
| 137203852 | 137618492 | chr1  | 137351179 | 137351260 | Mir1231       |
| 137203852 | 137618492 | chr1  | 137198111 | 137210314 | Timm17a       |
| 137203852 | 137618492 | chr1  | 137278891 | 137327068 | Ipo9          |
| 137203852 | 137618492 | chr1  | 137221389 | 137264642 | Lmod1         |
| 137203852 | 137618492 | chr1  | 137331156 | 137481932 | Nav1          |
| 154862099 | 155170590 | chr1  | 154969885 | 155033577 | Lamc2         |
| 154862099 | 155170590 | chr1  | 155066051 | 155179916 | Lamc1         |
| 154862099 | 155170590 | chr1  | 154802230 | 154966391 | Nmnat2        |
| 163875854 | 164278894 | chr1  | 163899318 | 163903566 | Pigc          |
| 163875854 | 164278894 | chr1  | 164147944 | 164148054 | Mir199a-2     |
| 163875854 | 164278894 | chr1  | 164153498 | 164153608 | Mir214        |
| 163875854 | 164278894 | chr1  | 163872219 | 163909767 | 4930558K02Rik |
| 163875854 | 164278894 | chr1  | 163935099 | 163946616 | 2810442N19Rik |
| 163875854 | 164278894 | chr1  | 164147753 | 164155681 | Dnm3os        |
| 163875854 | 164278894 | chr1  | 163917432 | 164408165 | Dnm3          |
| 165022522 | 165952112 | chr1  | 165925075 | 165927374 | Mettl18       |
| 165022522 | 165952112 | chr1  | 165175249 | 165243781 | Prrx1         |

|           |           |       |           |           |               |
|-----------|-----------|-------|-----------|-----------|---------------|
| 165022522 | 165952112 | chr1  | 165315039 | 165333772 | Gorab         |
| 165022522 | 165952112 | chr1  | 165633123 | 165655363 | Mettl11b      |
| 165022522 | 165952112 | chr1  | 165859230 | 165885257 | Scyl3         |
| 165022522 | 165952112 | chr1  | 165884138 | 165924912 | BC055324      |
| 165022522 | 165952112 | chr1  | 165709809 | 165847231 | Kifap3        |
| 182133467 | 183561613 | chr1  | 182257099 | 182260680 | Gm5069        |
| 182133467 | 183561613 | chr1  | 182517331 | 182517398 | Mir6904       |
| 182133467 | 183561613 | chr1  | 182623178 | 182627165 | Mixl1         |
| 182133467 | 183561613 | chr1  | 182732698 | 182743734 | H3f3a         |
| 182133467 | 183561613 | chr1  | 182834404 | 182838219 | Pycr2         |
| 182133467 | 183561613 | chr1  | 182865169 | 182868532 | Lefty1        |
| 182133467 | 183561613 | chr1  | 182981367 | 182990798 | 9130409I23Rik |
| 182133467 | 183561613 | chr1  | 183439763 | 183441582 | Ccdc121       |
| 182133467 | 183561613 | chr1  | 182157134 | 182186431 | Psen2         |
| 182133467 | 183561613 | chr1  | 182362503 | 182413635 | 6330403A02Rik |
| 182133467 | 183561613 | chr1  | 182499105 | 182531385 | Parp1         |
| 182133467 | 183561613 | chr1  | 182656173 | 182684335 | Acdb3         |
| 182133467 | 183561613 | chr1  | 182781281 | 182798245 | Sde2          |
| 182133467 | 183561613 | chr1  | 182823249 | 182829233 | Lefty2        |
| 182133467 | 183561613 | chr1  | 182872648 | 182905235 | Tmem63a       |
| 182133467 | 183561613 | chr1  | 182919686 | 182947626 | Ephx1         |
| 182133467 | 183561613 | chr1  | 183023553 | 183074288 | Nvl           |
| 182133467 | 183561613 | chr1  | 183081061 | 183099125 | Cnih4         |
| 182133467 | 183561613 | chr1  | 182260606 | 182353790 | Itpkb         |
| 182133467 | 183561613 | chr1  | 182571464 | 182620818 | Lin9          |
| 182133467 | 183561613 | chr1  | 183103356 | 183142109 | Wdr26         |
| 182133467 | 183561613 | chr1  | 183282758 | 183390772 | Cnih3         |
| 183666102 | 184518442 | chr1  | 184087308 | 184088229 | Vmn1r1        |
| 183666102 | 184518442 | chr1  | 184205900 | 184212890 | Degs1         |
| 183666102 | 184518442 | chr1  | 184230964 | 184233420 | 1700047M11Rik |
| 183666102 | 184518442 | chr1  | 184054867 | 184062546 | Srp9          |
| 183666102 | 184518442 | chr1  | 184243232 | 184271737 | Fbxo28        |
| 183666102 | 184518442 | chr1  | 184339297 | 184392567 | Trp53bp2      |
| 183666102 | 184518442 | chr1  | 183745445 | 183772532 | Lbr           |
| 183666102 | 184518442 | chr1  | 183826515 | 183950111 | Enah          |
| 183666102 | 184518442 | chr1  | 184397389 | 184447614 | Capn2         |
| 183666102 | 184518442 | chr1  | 184495137 | 184562483 | Capn8         |
| 185352899 | 186077859 | chr1  | 185856910 | 185857877 | 1700056E22Rik |
| 185352899 | 186077859 | chr1  | 185858339 | 185899515 | Dusp10        |
| 79144122  | 79677899  | chr10 | 79151764  | 79158005  | Gzmm          |
| 79144122  | 79677899  | chr10 | 79210453  | 79210473  | Mir7669       |
| 79144122  | 79677899  | chr10 | 79217863  | 79219706  | Fgf22         |
| 79144122  | 79677899  | chr10 | 79221259  | 79229697  | Rnf126        |
| 79144122  | 79677899  | chr10 | 79240018  | 79245375  | Fstl3         |
| 79144122  | 79677899  | chr10 | 79283765  | 79293197  | Misp          |
| 79144122  | 79677899  | chr10 | 79317176  | 79327180  | Ptbp1         |
| 79144122  | 79677899  | chr10 | 79325331  | 79325397  | Mir6910       |

|          |          |       |          |          |               |
|----------|----------|-------|----------|----------|---------------|
| 79144122 | 79677899 | chr10 | 79342411 | 79345917 | Prtn3         |
| 79144122 | 79677899 | chr10 | 79349056 | 79350961 | Elane         |
| 79144122 | 79677899 | chr10 | 79353597 | 79355401 | Cfd           |
| 79144122 | 79677899 | chr10 | 79372797 | 79379675 | R3hdm4        |
| 79144122 | 79677899 | chr10 | 79433468 | 79439935 | Grin3b        |
| 79144122 | 79677899 | chr10 | 79451344 | 79458145 | Cnn2          |
| 79144122 | 79677899 | chr10 | 79479416 | 79494216 | Hmha1         |
| 79144122 | 79677899 | chr10 | 79498697 | 79502404 | Polr2e        |
| 79144122 | 79677899 | chr10 | 79516254 | 79519184 | Gpx4          |
| 79144122 | 79677899 | chr10 | 79579280 | 79593215 | Stk11         |
| 79144122 | 79677899 | chr10 | 79605059 | 79608563 | Atp5d         |
| 79144122 | 79677899 | chr10 | 79611034 | 79621112 | Midn          |
| 79144122 | 79677899 | chr10 | 79630585 | 79634398 | Cirbp         |
| 79144122 | 79677899 | chr10 | 79635688 | 79637864 | 1600002K03Rik |
| 79144122 | 79677899 | chr10 | 79144939 | 79151143 | Cdc34         |
| 79144122 | 79677899 | chr10 | 79179378 | 79198853 | Hcn2          |
| 79144122 | 79677899 | chr10 | 79198869 | 79209326 | Polrmt        |
| 79144122 | 79677899 | chr10 | 79244218 | 79251730 | Prss57        |
| 79144122 | 79677899 | chr10 | 79256316 | 79283641 | Palm          |
| 79144122 | 79677899 | chr10 | 79314121 | 79317716 | E130317F20Rik |
| 79144122 | 79677899 | chr10 | 79323219 | 79337379 | BC005764      |
| 79144122 | 79677899 | chr10 | 79327525 | 79337379 | BC005764      |
| 79144122 | 79677899 | chr10 | 79357451 | 79371683 | Med16         |
| 79144122 | 79677899 | chr10 | 79379715 | 79385017 | Kiss1r        |
| 79144122 | 79677899 | chr10 | 79389816 | 79417757 | Arid3a        |
| 79144122 | 79677899 | chr10 | 79439864 | 79447075 | Tmem259       |
| 79144122 | 79677899 | chr10 | 79460359 | 79478317 | Abca7         |
| 79144122 | 79677899 | chr10 | 79593178 | 79602112 | Dos           |
| 79144122 | 79677899 | chr10 | 79642226 | 79652755 | Efna2         |
| 79144122 | 79677899 | chr10 | 79167102 | 79174724 | Bsg           |
| 79144122 | 79677899 | chr10 | 79422896 | 79431991 | Wdr18         |
| 79144122 | 79677899 | chr10 | 79519758 | 79565447 | Sbno2         |
| 79833146 | 80281220 | chr10 | 79843099 | 79850396 | Mex3d         |
| 79833146 | 80281220 | chr10 | 79865741 | 79869566 | Uqcr11        |
| 79833146 | 80281220 | chr10 | 80072004 | 80072074 | Mir6912       |
| 79833146 | 80281220 | chr10 | 80258843 | 80261371 | Plekhj1       |
| 79833146 | 80281220 | chr10 | 80267992 | 80270393 | Amh           |
| 79833146 | 80281220 | chr10 | 80271240 | 80276243 | Jsrp1         |
| 79833146 | 80281220 | chr10 | 79855285 | 79862224 | Mbd3          |
| 79833146 | 80281220 | chr10 | 79871909 | 79896398 | Tcf3          |
| 79833146 | 80281220 | chr10 | 79957650 | 79980005 | Onecut3       |
| 79833146 | 80281220 | chr10 | 79982329 | 80001869 | Atp8b3        |
| 79833146 | 80281220 | chr10 | 80003670 | 80024305 | Rexo1         |
| 79833146 | 80281220 | chr10 | 80029865 | 80040041 | Klf16         |
| 79833146 | 80281220 | chr10 | 80046393 | 80053086 | Abhd17a       |
| 79833146 | 80281220 | chr10 | 80065624 | 80070399 | Adat3         |
| 79833146 | 80281220 | chr10 | 80065626 | 80078528 | Scamp4        |



|           |           |       |           |           |               |
|-----------|-----------|-------|-----------|-----------|---------------|
| 79833146  | 80281220  | chr10 | 80085524  | 80103516  | Csnk1g2       |
| 79833146  | 80281220  | chr10 | 80105361  | 80119816  | Btbd2         |
| 79833146  | 80281220  | chr10 | 80128073  | 80134721  | Mknk2         |
| 79833146  | 80281220  | chr10 | 80147997  | 80164565  | Mob3a         |
| 79833146  | 80281220  | chr10 | 80165437  | 80168127  | Izumo4        |
| 79833146  | 80281220  | chr10 | 80169722  | 80204956  | Ap3d1         |
| 79833146  | 80281220  | chr10 | 80217950  | 80257092  | Dot1l         |
| 79833146  | 80281220  | chr10 | 80261479  | 80267667  | Sf3a2         |
| 94966427  | 95395190  | chr10 | 95021864  | 95021955  | Mir3058       |
| 94966427  | 95395190  | chr10 | 94977795  | 95008292  | Ube2n         |
| 94966427  | 95395190  | chr10 | 95009640  | 95026801  | Nudt4         |
| 96084906  | 97219513  | chr10 | 96079634  | 96085445  | Btg1          |
| 96084906  | 97219513  | chr10 | 96886111  | 96886196  | Mir3966       |
| 96084906  | 97219513  | chr10 | 97028134  | 97035337  | Lum           |
| 96084906  | 97219513  | chr10 | 96498401  | 96523693  | 4930556N09Rik |
| 96084906  | 97219513  | chr10 | 96942133  | 96980796  | Dcn           |
| 96084906  | 97219513  | chr10 | 97053617  | 97059565  | 4930473O22Rik |
| 96084906  | 97219513  | chr10 | 97069838  | 97076322  | Kera          |
| 96084906  | 97219513  | chr10 | 97155692  | 97157560  | Ccer1         |
| 96084906  | 97219513  | chr10 | 97106701  | 97144534  | Epyc          |
| 96084906  | 97219513  | chr10 | 97144047  | 97429724  | Gm10754       |
| 117963344 | 118104974 | chr10 | 117939090 | 117993581 | Tmevpg1       |
| 3005034   | 3147274   | chr11 | 3024023   | 3031947   | Pisd-ps1      |
| 3005034   | 3147274   | chr11 | 3024029   | 3031945   | Pisd-ps3      |
| 3005034   | 3147274   | chr11 | 3031852   | 3093466   | Sfi1          |
| 3005034   | 3147274   | chr11 | 3102355   | 3144591   | Eif4enif1     |
| 51600425  | 51775815  | chr11 | 51577164  | 51605455  | Sar1b         |
| 51600425  | 51775815  | chr11 | 51626957  | 51670983  | Jade2         |
| 53112539  | 53213033  | chr11 | 53138190  | 53146803  | Zcchc10       |
| 53112539  | 53213033  | chr11 | 53073315  | 53113981  | Hspa4         |
| 53112539  | 53213033  | chr11 | 53164268  | 53235332  | Aff4          |
| 60588405  | 60743042  | chr11 | 60591026  | 60601789  | Smcr8         |
| 60588405  | 60743042  | chr11 | 60602398  | 60624767  | Shmt1         |
| 60588405  | 60743042  | chr11 | 60644132  | 60671925  | Dhrs7b        |
| 60588405  | 60743042  | chr11 | 60715747  | 60727294  | Gm16515       |
| 60588405  | 60743042  | chr11 | 60734442  | 60745369  | Map2k3os      |
| 60588405  | 60743042  | chr11 | 60553560  | 60590867  | Top3a         |
| 60588405  | 60743042  | chr11 | 60677953  | 60692540  | Tmem11        |
| 76480960  | 76771970  | chr11 | 76485971  | 76487178  | Bhlha9        |
| 76480960  | 76771970  | chr11 | 76493374  | 76512166  | Tusc5         |
| 76480960  | 76771970  | chr11 | 76590709  | 76660510  | Cpd           |
| 76480960  | 76771970  | chr11 | 76718046  | 76730088  | Tmigd1        |
| 76480960  | 76771970  | chr11 | 76759157  | 76800891  | Blmh          |
| 76480960  | 76771970  | chr11 | 76540103  | 76577057  | Gosr1         |
| 77763272  | 78070877  | chr11 | 77845814  | 77851366  | Dhrs13        |
| 77763272  | 78070877  | chr11 | 77886506  | 77886572  | Mir144        |
| 77763272  | 78070877  | chr11 | 77886671  | 77886743  | Mir451        |

|          |          |       |          |          |               |
|----------|----------|-------|----------|----------|---------------|
| 77763272 | 78070877 | chr11 | 77886671 | 77886743 | Mir451b       |
| 77763272 | 78070877 | chr11 | 77971924 | 77979052 | Traf4         |
| 77763272 | 78070877 | chr11 | 77992267 | 77994274 | Tlcd1         |
| 77763272 | 78070877 | chr11 | 77992328 | 77992389 | Mir7653       |
| 77763272 | 78070877 | chr11 | 77994436 | 77997086 | Rpl23a        |
| 77763272 | 78070877 | chr11 | 77994803 | 77994848 | Snord42a      |
| 77763272 | 78070877 | chr11 | 77995188 | 77995258 | Snord4a       |
| 77763272 | 78070877 | chr11 | 77996560 | 77996615 | Snord42b      |
| 77763272 | 78070877 | chr11 | 78006893 | 78019265 | Proca1        |
| 77763272 | 78070877 | chr11 | 78059247 | 78068998 | Sdf2          |
| 77763272 | 78070877 | chr11 | 77744444 | 77792544 | Sez6          |
| 77763272 | 78070877 | chr11 | 77796317 | 77844037 | Phf12         |
| 77763272 | 78070877 | chr11 | 77886877 | 77893885 | Eral1         |
| 77763272 | 78070877 | chr11 | 77908174 | 77970841 | Fam222b       |
| 77763272 | 78070877 | chr11 | 78001928 | 78005695 | Rab34         |
| 77763272 | 78070877 | chr11 | 78020250 | 78059205 | Supt6         |
| 77763272 | 78070877 | chr11 | 77851442 | 77873934 | Flot2         |
| 77763272 | 78070877 | chr11 | 77979607 | 77990168 | Nek8          |
| 86147442 | 86793615 | chr11 | 86397568 | 86397660 | Mir21         |
| 86147442 | 86793615 | chr11 | 86497484 | 86505959 | Ptrh2         |
| 86147442 | 86793615 | chr11 | 86298158 | 86312509 | Rnft1         |
| 86147442 | 86793615 | chr11 | 86312512 | 86358309 | Rps6kb1       |
| 86147442 | 86793615 | chr11 | 86397366 | 86497324 | Vmp1          |
| 86147442 | 86793615 | chr11 | 86508154 | 86570994 | Cltc          |
| 86147442 | 86793615 | chr11 | 86582350 | 86621162 | Dhx40         |
| 86147442 | 86793615 | chr11 | 86079216 | 86171027 | Med13         |
| 86147442 | 86793615 | chr11 | 86358492 | 86380862 | Tubd1         |
| 86147442 | 86793615 | chr11 | 86749926 | 86807264 | Ypel2         |
| 94156245 | 94313493 | chr11 | 94152452 | 94183225 | Luc7l3        |
| 94156245 | 94313493 | chr11 | 94189314 | 94203161 | Ankrd40       |
| 94156245 | 94313493 | chr11 | 94269704 | 94335512 | Cacna1g       |
| 94156245 | 94313493 | chr11 | 94204608 | 94254290 | Abcc3         |
| 94850680 | 94989510 | chr11 | 94981430 | 94986605 | Dlx3          |
| 94850680 | 94989510 | chr11 | 94852525 | 94868212 | Ppp1r9b       |
| 94850680 | 94989510 | chr11 | 94871192 | 94887401 | Samd14        |
| 94850680 | 94989510 | chr11 | 94905795 | 94938028 | Itga3         |
| 94850680 | 94989510 | chr11 | 94887571 | 94902685 | Pdk2          |
| 97118018 | 97338198 | chr11 | 97177029 | 97191234 | Mrpl45        |
| 97118018 | 97338198 | chr11 | 97193422 | 97213387 | Gpr179        |
| 97118018 | 97338198 | chr11 | 97311473 | 97363714 | Arhgap23      |
| 97118018 | 97338198 | chr11 | 97067170 | 97141890 | Npepps        |
| 97118018 | 97338198 | chr11 | 97223864 | 97259856 | Socs7         |
| 97354716 | 97783301 | chr11 | 97488700 | 97491030 | E130012A19Rik |
| 97354716 | 97783301 | chr11 | 97538373 | 97538444 | Mir6927       |
| 97354716 | 97783301 | chr11 | 97547265 | 97549939 | Cisd3         |
| 97354716 | 97783301 | chr11 | 97606210 | 97606349 | Mir8102       |
| 97354716 | 97783301 | chr11 | 97632794 | 97637232 | 1700001P01Rik |

|           |           |       |           |           |               |
|-----------|-----------|-------|-----------|-----------|---------------|
| 97354716  | 97783301  | chr11 | 97638839  | 97643753  | Rpl23         |
| 97354716  | 97783301  | chr11 | 97642952  | 97643080  | Snora21       |
| 97354716  | 97783301  | chr11 | 97702093  | 97704357  | B230217C12Rik |
| 97354716  | 97783301  | chr11 | 97311473  | 97363714  | Arhgap23      |
| 97354716  | 97783301  | chr11 | 97459824  | 97484207  | 2410003L11Rik |
| 97354716  | 97783301  | chr11 | 97524725  | 97546772  | Mllt6         |
| 97354716  | 97783301  | chr11 | 97550136  | 97561811  | Pcgf2         |
| 97354716  | 97783301  | chr11 | 97564747  | 97574814  | Psmb3         |
| 97354716  | 97783301  | chr11 | 97576470  | 97606018  | Pip4k2b       |
| 97354716  | 97783301  | chr11 | 97606783  | 97627927  | Cwc25         |
| 97354716  | 97783301  | chr11 | 97660985  | 97700078  | Lasp1         |
| 97354716  | 97783301  | chr11 | 97715620  | 97745468  | Fbxo47        |
| 97354716  | 97783301  | chr11 | 97370653  | 97436440  | Srcin1        |
| 98737360  | 98994996  | chr11 | 98843493  | 98844330  | Gjd3          |
| 98737360  | 98994996  | chr11 | 98724911  | 98766892  | Wipf2         |
| 98737360  | 98994996  | chr11 | 98769202  | 98785256  | Cdc6          |
| 98737360  | 98994996  | chr11 | 98854260  | 98885503  | Top2a         |
| 98737360  | 98994996  | chr11 | 98902573  | 98913957  | Igfbp4        |
| 98737360  | 98994996  | chr11 | 98926991  | 98950620  | Tns4          |
| 98737360  | 98994996  | chr11 | 98799009  | 98836256  | Rara          |
| 100513100 | 101679167 | chr11 | 100566059 | 100573781 | Kat2a         |
| 100513100 | 101679167 | chr11 | 100575163 | 100575889 | Hspb9         |
| 100513100 | 101679167 | chr11 | 100623006 | 100624245 | Hcrt          |
| 100513100 | 101679167 | chr11 | 100891653 | 100891723 | Mir6928       |
| 100513100 | 101679167 | chr11 | 100931407 | 100938985 | Naglu         |
| 100513100 | 101679167 | chr11 | 100939724 | 100941819 | Hsd17b1       |
| 100513100 | 101679167 | chr11 | 100943938 | 100947933 | Coasy         |
| 100513100 | 101679167 | chr11 | 100948603 | 100953521 | Mlx           |
| 100513100 | 101679167 | chr11 | 100953454 | 100956749 | Psmc3ip       |
| 100513100 | 101679167 | chr11 | 100981444 | 100987733 | Tubg1         |
| 100513100 | 101679167 | chr11 | 101017197 | 101023101 | Tubg2         |
| 100513100 | 101679167 | chr11 | 101023992 | 101032616 | Plekhh3       |
| 100513100 | 101679167 | chr11 | 101034311 | 101036757 | Ccr10         |
| 100513100 | 101679167 | chr11 | 101107647 | 101109564 | Ramp2         |
| 100513100 | 101679167 | chr11 | 101115020 | 101120861 | Vps25         |
| 100513100 | 101679167 | chr11 | 101139283 | 101140262 | Coa3          |
| 100513100 | 101679167 | chr11 | 101140516 | 101150015 | Cntd1         |
| 100513100 | 101679167 | chr11 | 101177564 | 101184844 | Psme3         |
| 100513100 | 101679167 | chr11 | 101191919 | 101200744 | Aoc3          |
| 100513100 | 101679167 | chr11 | 101280500 | 101280567 | Mir6929       |
| 100513100 | 101679167 | chr11 | 101286398 | 101296979 | Rundc1        |
| 100513100 | 101679167 | chr11 | 101303558 | 101306910 | Rpl27         |
| 100513100 | 101679167 | chr11 | 101320061 | 101327513 | Vat1          |
| 100513100 | 101679167 | chr11 | 101329651 | 101332620 | Rnd2          |
| 100513100 | 101679167 | chr11 | 101472013 | 101477270 | LOC666331     |
| 100513100 | 101679167 | chr11 | 101489262 | 101497395 | Rdm1          |
| 100513100 | 101679167 | chr11 | 101526854 | 101529146 | Arl4d         |

|           |           |       |           |           |               |
|-----------|-----------|-------|-----------|-----------|---------------|
| 100513100 | 101679167 | chr11 | 100556197 | 100565585 | Dhx58         |
| 100513100 | 101679167 | chr11 | 100576579 | 100599444 | Rab5c         |
| 100513100 | 101679167 | chr11 | 100601691 | 100621092 | Kcnh4         |
| 100513100 | 101679167 | chr11 | 100627645 | 100632271 | Ghdc          |
| 100513100 | 101679167 | chr11 | 100720664 | 100746483 | Stat5a        |
| 100513100 | 101679167 | chr11 | 100818050 | 100831931 | Ptrf          |
| 100513100 | 101679167 | chr11 | 100870765 | 100925031 | Atp6v0a1      |
| 100513100 | 101679167 | chr11 | 100957635 | 100981157 | Fam134c       |
| 100513100 | 101679167 | chr11 | 101037430 | 101052034 | Cntnap1       |
| 100513100 | 101679167 | chr11 | 101121880 | 101138723 | Wnk4          |
| 100513100 | 101679167 | chr11 | 101149580 | 101163581 | Becn1         |
| 100513100 | 101679167 | chr11 | 101229043 | 101239217 | G6pc          |
| 100513100 | 101679167 | chr11 | 101268153 | 101278747 | Aarsd1        |
| 100513100 | 101679167 | chr11 | 101280127 | 101286647 | Ptges3l       |
| 100513100 | 101679167 | chr11 | 101350077 | 101413269 | Brca1         |
| 100513100 | 101679167 | chr11 | 101413420 | 101443265 | Nbr1          |
| 100513100 | 101679167 | chr11 | 101594269 | 101628671 | Dhx8          |
| 100513100 | 101679167 | chr11 | 101631055 | 101646624 | Etv4          |
| 100513100 | 101679167 | chr11 | 100748123 | 100800825 | Stat3         |
| 100513100 | 101679167 | chr11 | 101052428 | 101087764 | Ezh1          |
| 100513100 | 101679167 | chr11 | 101186376 | 101191008 | Aoc2          |
| 100513100 | 101679167 | chr11 | 101309725 | 101320015 | Ifi35         |
| 100513100 | 101679167 | chr11 | 101443555 | 101453099 | Tmem106a      |
| 100513100 | 101679167 | chr11 | 100642044 | 100711899 | Stat5b        |
| 102117514 | 102893360 | chr11 | 102146274 | 102150738 | Tmub2         |
| 102117514 | 102893360 | chr11 | 102254716 | 102264253 | Rundc3a       |
| 102117514 | 102893360 | chr11 | 102264294 | 102268831 | Slc25a39      |
| 102117514 | 102893360 | chr11 | 102266233 | 102266301 | Mir6930       |
| 102117514 | 102893360 | chr11 | 102291635 | 102298123 | Grn           |
| 102117514 | 102893360 | chr11 | 102437712 | 102440433 | Gm11627       |
| 102117514 | 102893360 | chr11 | 102465744 | 102469372 | Fzd2          |
| 102117514 | 102893360 | chr11 | 102697609 | 102699353 | Higd1b        |
| 102117514 | 102893360 | chr11 | 102746482 | 102748045 | Fam187a       |
| 102117514 | 102893360 | chr11 | 102748649 | 102758514 | Gfap          |
| 102117514 | 102893360 | chr11 | 102800577 | 102807775 | C1ql1         |
| 102117514 | 102893360 | chr11 | 102819613 | 102825468 | 2410004I01Rik |
| 102117514 | 102893360 | chr11 | 102861161 | 102861235 | Mir6931       |
| 102117514 | 102893360 | chr11 | 102110195 | 102126497 | BC030867      |
| 102117514 | 102893360 | chr11 | 102130136 | 102139375 | Asb16         |
| 102117514 | 102893360 | chr11 | 102150613 | 102157943 | Atxn7l3       |
| 102117514 | 102893360 | chr11 | 102165873 | 102180410 | Ubtf          |
| 102117514 | 102893360 | chr11 | 102210133 | 102226595 | Slc4a1        |
| 102117514 | 102893360 | chr11 | 102298295 | 102308977 | Fam171a2      |
| 102117514 | 102893360 | chr11 | 102314610 | 102331197 | Itga2b        |
| 102117514 | 102893360 | chr11 | 102480820 | 102485730 | 2810433D01Rik |
| 102117514 | 102893360 | chr11 | 102526898 | 102543552 | Gm1564        |
| 102117514 | 102893360 | chr11 | 102546001 | 102559039 | Ccdc43        |

|           |           |       |           |           |               |
|-----------|-----------|-------|-----------|-----------|---------------|
| 102117514 | 102893360 | chr11 | 102660791 | 102681000 | Gjc1          |
| 102117514 | 102893360 | chr11 | 102699785 | 102742289 | Eftud2        |
| 102117514 | 102893360 | chr11 | 102742557 | 102746529 | Ccdc103       |
| 102117514 | 102893360 | chr11 | 102766832 | 102786438 | Kif18b        |
| 102117514 | 102893360 | chr11 | 102855369 | 102878461 | Dcakd         |
| 102117514 | 102893360 | chr11 | 102337229 | 102417472 | Gpatch8       |
| 102117514 | 102893360 | chr11 | 102622752 | 102641576 | Adam11        |
| 102117514 | 102893360 | chr11 | 102889875 | 102927419 | Nmt1          |
| 102960827 | 103212701 | chr11 | 102977638 | 102981038 | Hexim1        |
| 102960827 | 103212701 | chr11 | 102994652 | 103001222 | Hexim2        |
| 102960827 | 103212701 | chr11 | 103060257 | 103069872 | 1700023F06Rik |
| 102960827 | 103212701 | chr11 | 103206066 | 103211440 | Arhgap27os3   |
| 102960827 | 103212701 | chr11 | 102931609 | 102962972 | Plcd3         |
| 102960827 | 103212701 | chr11 | 102963001 | 102973513 | Acbd4         |
| 102960827 | 103212701 | chr11 | 103032451 | 103060214 | Fmnl1         |
| 102960827 | 103212701 | chr11 | 103069440 | 103079746 | Spata32       |
| 102960827 | 103212701 | chr11 | 103081077 | 103128715 | Map3k14       |
| 102960827 | 103212701 | chr11 | 103192797 | 103225006 | Arhgap27      |
| 115258953 | 115591750 | chr11 | 115265079 | 115272227 | Ict1          |
| 115258953 | 115591750 | chr11 | 115281439 | 115292588 | Kctd2         |
| 115258953 | 115591750 | chr11 | 115301858 | 115309582 | 4933422H20Rik |
| 115258953 | 115591750 | chr11 | 115309274 | 115309374 | Mir3968       |
| 115258953 | 115591750 | chr11 | 115351739 | 115353128 | Nt5c          |
| 115258953 | 115591750 | chr11 | 115384445 | 115384530 | Mir684-1      |
| 115258953 | 115591750 | chr11 | 115465464 | 115468938 | Mrps7         |
| 115258953 | 115591750 | chr11 | 115469232 | 115474283 | Mif4gd        |
| 115258953 | 115591750 | chr11 | 115475494 | 115489609 | Slc25a19      |
| 115258953 | 115591750 | chr11 | 115277010 | 115281233 | Atp5h         |
| 115258953 | 115591750 | chr11 | 115323786 | 115335712 | Slc16a5       |
| 115258953 | 115591750 | chr11 | 115358666 | 115375684 | Hn1           |
| 115258953 | 115591750 | chr11 | 115384422 | 115397544 | Sumo2         |
| 115258953 | 115591750 | chr11 | 115425757 | 115445238 | Nup85         |
| 115258953 | 115591750 | chr11 | 115445568 | 115465230 | Gga3          |
| 115258953 | 115591750 | chr11 | 115505457 | 115569911 | Grb2          |
| 115258953 | 115591750 | chr11 | 115336990 | 115351780 | Armc7         |
| 115714095 | 116096911 | chr11 | 115761452 | 115767583 | Smim5         |
| 115714095 | 116096911 | chr11 | 115773330 | 115775231 | Smim6         |
| 115714095 | 116096911 | chr11 | 115869670 | 115874033 | Galk1         |
| 115714095 | 116096911 | chr11 | 115939886 | 115948278 | Wbp2          |
| 115714095 | 116096911 | chr11 | 115967063 | 115971549 | Trim47        |
| 115714095 | 116096911 | chr11 | 115986021 | 115992442 | Trim65        |
| 115714095 | 116096911 | chr11 | 115685371 | 115717094 | Llgl2         |
| 115714095 | 116096911 | chr11 | 115753908 | 115794806 | Recql5        |
| 115714095 | 116096911 | chr11 | 115794972 | 115826848 | Sap30bp       |
| 115714095 | 116096911 | chr11 | 115883274 | 115885818 | H3f3b         |
| 115714095 | 116096911 | chr11 | 115891629 | 115922528 | Unk           |
| 115714095 | 116096911 | chr11 | 115923409 | 115939275 | Unc13d        |

|           |           |       |           |           |               |
|-----------|-----------|-------|-----------|-----------|---------------|
| 115714095 | 116096911 | chr11 | 116003598 | 116029492 | Fbf1          |
| 115714095 | 116096911 | chr11 | 116033196 | 116060359 | Acox1         |
| 115714095 | 116096911 | chr11 | 116060168 | 116076632 | Ten1          |
| 115714095 | 116096911 | chr11 | 116077315 | 116081601 | Cdk3-ps       |
| 115714095 | 116096911 | chr11 | 116081872 | 116099405 | Evpl          |
| 115714095 | 116096911 | chr11 | 115836038 | 115869725 | Itgb4         |
| 115714095 | 116096911 | chr11 | 115993130 | 116000182 | Mrpl38        |
| 116950535 | 117190356 | chr11 | 116976485 | 117020582 | Sec14l1       |
| 116950535 | 117190356 | chr11 | 117060974 | 117223639 | Sep-09        |
| 117681106 | 117926951 | chr11 | 117687232 | 117701222 | Afmid         |
| 117681106 | 117926951 | chr11 | 117710550 | 117717057 | Birc5         |
| 117681106 | 117926951 | chr11 | 117722065 | 117726857 | Tmem235       |
| 117681106 | 117926951 | chr11 | 117729262 | 117734840 | Tha1          |
| 117681106 | 117926951 | chr11 | 117827400 | 117830680 | Socs3         |
| 117681106 | 117926951 | chr11 | 117863583 | 117863664 | Mir6933       |
| 117681106 | 117926951 | chr11 | 117676832 | 117687328 | Tk1           |
| 117681106 | 117926951 | chr11 | 117848170 | 117885325 | Pgs1          |
| 117681106 | 117926951 | chr11 | 117883036 | 117990533 | Dnah17        |
| 119843251 | 120195084 | chr11 | 119876078 | 119876176 | Mir338        |
| 119843251 | 120195084 | chr11 | 119876080 | 119876167 | Mir3065       |
| 119843251 | 120195084 | chr11 | 119951835 | 119960045 | Enthd2        |
| 119843251 | 120195084 | chr11 | 119960247 | 119961738 | 1810043H04Rik |
| 119843251 | 120195084 | chr11 | 120047963 | 120051170 | 2810410L24Rik |
| 119843251 | 120195084 | chr11 | 119804405 | 119868096 | Baiap2        |
| 119843251 | 120195084 | chr11 | 119868631 | 119908459 | Aatk          |
| 119843251 | 120195084 | chr11 | 119965264 | 120012665 | Slc38a10      |
| 119843251 | 120195084 | chr11 | 120094260 | 120153611 | Bahcc1        |
| 119843251 | 120195084 | chr11 | 119925743 | 119948141 | Azi1          |
| 120254948 | 120969900 | chr11 | 120308923 | 120314797 | Pde6g         |
| 120254948 | 120969900 | chr11 | 120317917 | 120319377 | Oxld1         |
| 120254948 | 120969900 | chr11 | 120325639 | 120328914 | Arl16         |
| 120254948 | 120969900 | chr11 | 120345982 | 120350068 | Mrpl12        |
| 120254948 | 120969900 | chr11 | 120392040 | 120400298 | Gcgr          |
| 120254948 | 120969900 | chr11 | 120411288 | 120412446 | Ppp1r27       |
| 120254948 | 120969900 | chr11 | 120455829 | 120459679 | Alyref        |
| 120254948 | 120969900 | chr11 | 120459734 | 120469512 | Anapc11       |
| 120254948 | 120969900 | chr11 | 120469790 | 120470414 | Npb           |
| 120254948 | 120969900 | chr11 | 120479685 | 120486316 | Sirt7         |
| 120254948 | 120969900 | chr11 | 120486136 | 120486190 | Mir6936       |
| 120254948 | 120969900 | chr11 | 120489666 | 120494861 | Mafg          |
| 120254948 | 120969900 | chr11 | 120507344 | 120509651 | Myadml2       |
| 120254948 | 120969900 | chr11 | 120572254 | 120575081 | Stra13        |
| 120254948 | 120969900 | chr11 | 120575266 | 120582441 | Lrrc45        |
| 120254948 | 120969900 | chr11 | 120582781 | 120585283 | Rac3          |
| 120254948 | 120969900 | chr11 | 120586686 | 120588595 | Dcxr          |
| 120254948 | 120969900 | chr11 | 120590798 | 120593335 | Cbr2          |
| 120254948 | 120969900 | chr11 | 120642058 | 120645518 | Rfng          |

|           |           |       |           |           |               |
|-----------|-----------|-------|-----------|-----------|---------------|
| 120254948 | 120969900 | chr11 | 120645585 | 120650416 | Gps1          |
| 120254948 | 120969900 | chr11 | 120898062 | 120900792 | Cd7           |
| 120254948 | 120969900 | chr11 | 120914736 | 120924883 | Sectm1b       |
| 120254948 | 120969900 | chr11 | 120241111 | 120299014 | Nploc4        |
| 120254948 | 120969900 | chr11 | 120303944 | 120308635 | Tspan10       |
| 120254948 | 120969900 | chr11 | 120328948 | 120345298 | Hgs           |
| 120254948 | 120969900 | chr11 | 120353150 | 120362475 | Slc25a10      |
| 120254948 | 120969900 | chr11 | 120404201 | 120411041 | Fam195b       |
| 120254948 | 120969900 | chr11 | 120421617 | 120434250 | P4hb          |
| 120254948 | 120969900 | chr11 | 120438548 | 120442934 | Arhgdia       |
| 120254948 | 120969900 | chr11 | 120471400 | 120479204 | Pcyt2         |
| 120254948 | 120969900 | chr11 | 120497025 | 120504984 | Pycr1         |
| 120254948 | 120969900 | chr11 | 120515102 | 120522151 | Notum         |
| 120254948 | 120969900 | chr11 | 120534286 | 120570760 | Aspscr1       |
| 120254948 | 120969900 | chr11 | 120650515 | 120657709 | Dus1l         |
| 120254948 | 120969900 | chr11 | 120667271 | 120685861 | Fasn          |
| 120254948 | 120969900 | chr11 | 120809797 | 120820314 | Slc16a3       |
| 120254948 | 120969900 | chr11 | 120928716 | 120942453 | Sectm1a       |
| 120254948 | 120969900 | chr11 | 120319442 | 120325667 | Ccdc137       |
| 120254948 | 120969900 | chr11 | 120687855 | 120794186 | Ccdc57        |
| 120254948 | 120969900 | chr11 | 120823054 | 120852647 | Csnk1d        |
| 121451298 | 121704216 | chr11 | 121563740 | 121578703 | Metrn1        |
| 121451298 | 121704216 | chr11 | 121691531 | 121704750 | Ptchd3        |
| 121451298 | 121704216 | chr11 | 121313262 | 121478484 | Tbcd          |
| 121451298 | 121704216 | chr11 | 121477521 | 121534465 | B3gnt1        |
| 31843815  | 31946241  | chr12 | 31853726  | 31870787  | 6030469F06Rik |
| 74859064  | 75063815  | chr12 | 75008853  | 75048517  | Hif1a         |
| 74859064  | 75063815  | chr12 | 74686027  | 74879171  | Prkch         |
| 85404785  | 85636697  | chr12 | 85410274  | 85416969  | Acot5         |
| 85404785  | 85636697  | chr12 | 85487080  | 85489439  | Pnma1         |
| 85404785  | 85636697  | chr12 | 85441603  | 85450733  | Acot6         |
| 85404785  | 85636697  | chr12 | 85490122  | 85559831  | Elmsan1       |
| 85404785  | 85636697  | chr12 | 85626245  | 85656782  | Ptgr2         |
| 85404785  | 85636697  | chr12 | 85455277  | 85484460  | Dnal1         |
| 110635986 | 110736406 | chr12 | 110691032 | 110701546 | Dlk1          |
| 110846241 | 111622465 | chr12 | 110849709 | 110849805 | Mir341        |
| 110846241 | 111622465 | chr12 | 110850031 | 110850151 | Mir1188       |
| 110846241 | 111622465 | chr12 | 110856467 | 110856546 | Mir370        |
| 110846241 | 111622465 | chr12 | 110874221 | 110874290 | AF357425      |
| 110846241 | 111622465 | chr12 | 110881047 | 110881114 | AF357426      |
| 110846241 | 111622465 | chr12 | 110887826 | 110887897 | DQ267100      |
| 110846241 | 111622465 | chr12 | 110888918 | 110888948 | AF357359      |
| 110846241 | 111622465 | chr12 | 110889633 | 110889705 | DQ267101      |
| 110846241 | 111622465 | chr12 | 110892836 | 110892907 | AF357355      |
| 110846241 | 111622465 | chr12 | 110894554 | 110894625 | DQ267102      |
| 110846241 | 111622465 | chr12 | 110920406 | 110920483 | Mir882        |
| 110846241 | 111622465 | chr12 | 110947269 | 110947335 | Mir379        |

|           |           |       |           |           |               |
|-----------|-----------|-------|-----------|-----------|---------------|
| 110846241 | 111622465 | chr12 | 110948384 | 110948466 | Mir411        |
| 110846241 | 111622465 | chr12 | 110948847 | 110948910 | Mir299        |
| 110846241 | 111622465 | chr12 | 110948854 | 110948903 | Mir299b       |
| 110846241 | 111622465 | chr12 | 110950012 | 110950073 | Mir380        |
| 110846241 | 111622465 | chr12 | 110950526 | 110950646 | Mir1197       |
| 110846241 | 111622465 | chr12 | 110950717 | 110950803 | Mir323        |
| 110846241 | 111622465 | chr12 | 110951019 | 110951100 | Mir758        |
| 110846241 | 111622465 | chr12 | 110951690 | 110951787 | Mir329        |
| 110846241 | 111622465 | chr12 | 110953527 | 110953612 | Mir494        |
| 110846241 | 111622465 | chr12 | 110953786 | 110953860 | Mir679        |
| 110846241 | 111622465 | chr12 | 110953880 | 110954001 | Mir1193       |
| 110846241 | 111622465 | chr12 | 110955294 | 110955393 | Mir666        |
| 110846241 | 111622465 | chr12 | 110955467 | 110955543 | Mir543        |
| 110846241 | 111622465 | chr12 | 110956963 | 110957026 | Mir495        |
| 110846241 | 111622465 | chr12 | 110958215 | 110958307 | Mir667        |
| 110846241 | 111622465 | chr12 | 110960927 | 110961012 | Mir376c       |
| 110846241 | 111622465 | chr12 | 110961427 | 110961511 | Mir654        |
| 110846241 | 111622465 | chr12 | 110961667 | 110961749 | Mir376b       |
| 110846241 | 111622465 | chr12 | 110961990 | 110962058 | Mir376a       |
| 110846241 | 111622465 | chr12 | 110962522 | 110962601 | Mir300        |
| 110846241 | 111622465 | chr12 | 110965031 | 110965106 | Mir381        |
| 110846241 | 111622465 | chr12 | 110965542 | 110965624 | Mir487b       |
| 110846241 | 111622465 | chr12 | 110966338 | 110966412 | Mir539        |
| 110846241 | 111622465 | chr12 | 110971980 | 110972056 | Mir382        |
| 110846241 | 111622465 | chr12 | 110972348 | 110972419 | Mir134        |
| 110846241 | 111622465 | chr12 | 110972941 | 110973007 | Mir668        |
| 110846241 | 111622465 | chr12 | 110973111 | 110973184 | Mir485        |
| 110846241 | 111622465 | chr12 | 110973828 | 110973910 | Mir453        |
| 110846241 | 111622465 | chr12 | 110976642 | 110976708 | Mir154        |
| 110846241 | 111622465 | chr12 | 110977328 | 110977407 | Mir496        |
| 110846241 | 111622465 | chr12 | 110978719 | 110978787 | Mir377        |
| 110846241 | 111622465 | chr12 | 110980618 | 110980708 | Mir541        |
| 110846241 | 111622465 | chr12 | 110981367 | 110981446 | Mir409        |
| 110846241 | 111622465 | chr12 | 110981498 | 110981578 | Mir412        |
| 110846241 | 111622465 | chr12 | 110981627 | 110981706 | Mir369        |
| 110846241 | 111622465 | chr12 | 110981924 | 110982005 | Mir410        |
| 110846241 | 111622465 | chr12 | 110986087 | 110986170 | Mir3072       |
| 110846241 | 111622465 | chr12 | 111513594 | 111516278 | Dio3os        |
| 110846241 | 111622465 | chr12 | 111516257 | 111516339 | Mir1247       |
| 110846241 | 111622465 | chr12 | 111517439 | 111519307 | Dio3          |
| 110846241 | 111622465 | chr12 | 110973190 | 110987667 | Mirg          |
| 110846241 | 111622465 | chr12 | 111389863 | 111396283 | 3110009F21Rik |
| 110846241 | 111622465 | chr12 | 110842154 | 110899921 | Rian          |
| 32270874  | 32717144  | chr13 | 31911454  | 32430413  | Gmds          |
| 97975715  | 98800505  | chr13 | 98011059  | 98022995  | Enc1          |
| 97975715  | 98800505  | chr13 | 98329954  | 98353949  | Gm5086        |
| 97975715  | 98800505  | chr13 | 98668549  | 98976120  | Arhgef28      |



|          |          |       |          |          |               |
|----------|----------|-------|----------|----------|---------------|
| 22602483 | 24309508 | chr14 | 22665082 | 22668132 | Comtd1        |
| 22602483 | 24309508 | chr14 | 22569752 | 22617947 | Samd8         |
| 22602483 | 24309508 | chr14 | 22650782 | 22665101 | Vdac2         |
| 22602483 | 24309508 | chr14 | 23857416 | 23913793 | Gm10248       |
| 22602483 | 24309508 | chr14 | 22803183 | 22808823 | Zfp503        |
| 22602483 | 24309508 | chr14 | 23326395 | 23362020 | 4930405A10Rik |
| 22602483 | 24309508 | chr14 | 24117915 | 24823427 | Kcnma1        |
| 22602483 | 24309508 | chr14 | 22838933 | 23875310 | 1700112E06Rik |
| 66234826 | 66977487 | chr14 | 66424747 | 66436659 | Pbk           |
| 66234826 | 66977487 | chr14 | 66437863 | 66452806 | Esco2         |
| 66234826 | 66977487 | chr14 | 66587319 | 66600382 | Clu           |
| 66234826 | 66977487 | chr14 | 66914165 | 66915966 | 1700001G11Rik |
| 66234826 | 66977487 | chr14 | 66224103 | 66267280 | Nuggc         |
| 66234826 | 66977487 | chr14 | 66456138 | 66485441 | Ccdc25        |
| 66234826 | 66977487 | chr14 | 66538231 | 66572581 | Scara3        |
| 66234826 | 66977487 | chr14 | 66605623 | 66628047 | Gulo          |
| 66234826 | 66977487 | chr14 | 66646165 | 66696570 | Adam2         |
| 66234826 | 66977487 | chr14 | 66759796 | 66771785 | Chrna2        |
| 66234826 | 66977487 | chr14 | 66915861 | 66930261 | Trim35        |
| 66234826 | 66977487 | chr14 | 66285239 | 66383663 | Scara5        |
| 66234826 | 66977487 | chr14 | 66703208 | 66743359 | Ephx2         |
| 66234826 | 66977487 | chr14 | 66772093 | 66899889 | Ptk2b         |
| 66234826 | 66977487 | chr14 | 66963211 | 66980517 | Stmn4         |
| 75930140 | 76428950 | chr15 | 76046040 | 76046103 | Mir1942       |
| 75930140 | 76428950 | chr15 | 76077236 | 76080334 | Grina         |
| 75930140 | 76428950 | chr15 | 76078620 | 76078688 | Mir6953       |
| 75930140 | 76428950 | chr15 | 76097216 | 76100269 | Gm10872       |
| 75930140 | 76428950 | chr15 | 76124863 | 76127326 | Smpd5         |
| 75930140 | 76428950 | chr15 | 76157826 | 76161100 | Exosc4        |
| 75930140 | 76428950 | chr15 | 76161723 | 76165329 | Gpaa1         |
| 75930140 | 76428950 | chr15 | 76173952 | 76176364 | Cyc1          |
| 75930140 | 76428950 | chr15 | 76177469 | 76181540 | Sharpin       |
| 75930140 | 76428950 | chr15 | 76181723 | 76184808 | Maf1          |
| 75930140 | 76428950 | chr15 | 76199327 | 76201841 | Fam203a       |
| 75930140 | 76428950 | chr15 | 76202387 | 76205368 | Tssk5         |
| 75930140 | 76428950 | chr15 | 76263643 | 76263703 | Mir6954       |
| 75930140 | 76428950 | chr15 | 76287867 | 76289898 | Scx           |
| 75930140 | 76428950 | chr15 | 76366157 | 76369176 | Fbxl6         |
| 75930140 | 76428950 | chr15 | 76369372 | 76372560 | Slc52a2       |
| 75930140 | 76428950 | chr15 | 75931917 | 75950625 | Eppk1         |
| 75930140 | 76428950 | chr15 | 75949947 | 75956986 | BC024139      |
| 75930140 | 76428950 | chr15 | 76063424 | 76073870 | Parp10        |
| 75930140 | 76428950 | chr15 | 76098518 | 76123002 | Spatc1        |
| 75930140 | 76428950 | chr15 | 76127032 | 76137675 | Oplah         |
| 75930140 | 76428950 | chr15 | 76210942 | 76283469 | Mroh1         |
| 75930140 | 76428950 | chr15 | 76307874 | 76331402 | Hsf1          |
| 75930140 | 76428950 | chr15 | 76332444 | 76342248 | Dgat1         |

|          |          |       |          |          |               |
|----------|----------|-------|----------|----------|---------------|
| 75930140 | 76428950 | chr15 | 76346632 | 76352559 | Scrt1         |
| 75930140 | 76428950 | chr15 | 76426237 | 76438021 | Cpsf1         |
| 75930140 | 76428950 | chr15 | 76001403 | 76061808 | Plec          |
| 75930140 | 76428950 | chr15 | 76283425 | 76307699 | Bop1          |
| 75930140 | 76428950 | chr15 | 76406788 | 76426241 | Adck5         |
| 76630201 | 76835334 | chr15 | 76730370 | 76731727 | Commd5        |
| 76630201 | 76835334 | chr15 | 76734500 | 76736748 | Rpl8          |
| 76630201 | 76835334 | chr15 | 76778973 | 76781161 | 1110038F14Rik |
| 76630201 | 76835334 | chr15 | 76554414 | 76648600 | Arhgap39      |
| 76630201 | 76835334 | chr15 | 76682573 | 76701865 | Zfp251        |
| 76630201 | 76835334 | chr15 | 76709705 | 76722824 | Zfp7          |
| 76630201 | 76835334 | chr15 | 76740799 | 76755878 | Zfp647        |
| 77597146 | 77809923 | chr15 | 77745480 | 77759424 | Txn2          |
| 77597146 | 77809923 | chr15 | 77770951 | 77787152 | Foxred2       |
| 77597146 | 77809923 | chr15 | 77789427 | 77801254 | Eif3d         |
| 77597146 | 77809923 | chr15 | 77591014 | 77672605 | Myh9          |
| 78637286 | 78990484 | chr15 | 78681289 | 78685959 | Lgals2        |
| 78637286 | 78990484 | chr15 | 78722269 | 78722343 | Mir6955       |
| 78637286 | 78990484 | chr15 | 78744348 | 78749947 | Pdpx          |
| 78637286 | 78990484 | chr15 | 78765362 | 78772340 | Nol12         |
| 78637286 | 78990484 | chr15 | 78832652 | 78832714 | Mir6956       |
| 78637286 | 78990484 | chr15 | 78858641 | 78860930 | H1f0          |
| 78637286 | 78990484 | chr15 | 78971796 | 78982197 | Polr2f        |
| 78637286 | 78990484 | chr15 | 78673076 | 78681332 | Cdc42ep1      |
| 78637286 | 78990484 | chr15 | 78707619 | 78725015 | Gga1          |
| 78637286 | 78990484 | chr15 | 78730215 | 78742482 | Sh3bp1        |
| 78637286 | 78990484 | chr15 | 78757154 | 78760895 | Lgals1        |
| 78637286 | 78990484 | chr15 | 78778153 | 78836299 | Triobp        |
| 78637286 | 78990484 | chr15 | 78825384 | 78841471 | Gm10865       |
| 78637286 | 78990484 | chr15 | 78861303 | 78872961 | Gcat          |
| 78637286 | 78990484 | chr15 | 78872314 | 78873988 | Galr3         |
| 78637286 | 78990484 | chr15 | 78883523 | 78893289 | Ankrd54       |
| 78637286 | 78990484 | chr15 | 78905652 | 78924830 | Eif3l         |
| 78637286 | 78990484 | chr15 | 78939412 | 78967331 | Micall1       |
| 78637286 | 78990484 | chr15 | 78965084 | 78971681 | 1700088E04Rik |
| 78637286 | 78990484 | chr15 | 78985342 | 78994920 | Sox10         |
| 80861988 | 81161475 | chr15 | 81021282 | 81023187 | 4930483J18Rik |
| 80861988 | 81161475 | chr15 | 81073083 | 81082292 | 8430426J06Rik |
| 80861988 | 81161475 | chr15 | 81065928 | 81069394 | Mchr1         |
| 80861988 | 81161475 | chr15 | 81149350 | 81191195 | Slc25a17      |
| 80861988 | 81161475 | chr15 | 80842710 | 81021187 | Mkl1          |
| 81543710 | 81804556 | chr15 | 81678699 | 81688756 | Tob2          |
| 81543710 | 81804556 | chr15 | 81694945 | 81702322 | Phf5a         |
| 81543710 | 81804556 | chr15 | 81534677 | 81560349 | Rangap1       |
| 81543710 | 81804556 | chr15 | 81575277 | 81626699 | Zc3h7b        |
| 81543710 | 81804556 | chr15 | 81633102 | 81657293 | Tef           |
| 81543710 | 81804556 | chr15 | 81702892 | 81745567 | Aco2          |

|          |           |       |           |           |               |
|----------|-----------|-------|-----------|-----------|---------------|
| 81543710 | 81804556  | chr15 | 81745459  | 81756643  | Polr3h        |
| 81543710 | 81804556  | chr15 | 81767188  | 81781371  | Csdc2         |
| 81543710 | 81804556  | chr15 | 81781535  | 81791360  | Pmm1          |
| 97510561 | 97946300  | chr15 | 97541449  | 97561836  | Endou         |
| 97510561 | 97946300  | chr15 | 97575200  | 97598097  | Rapgef3       |
| 97510561 | 97946300  | chr15 | 97614795  | 97623123  | Slc48a1       |
| 97510561 | 97946300  | chr15 | 97684857  | 97738727  | Vdr           |
| 97510561 | 97946300  | chr15 | 97794659  | 97800717  | Tmem106c      |
| 97510561 | 97946300  | chr15 | 97806032  | 97835155  | Col2a1        |
| 97510561 | 97946300  | chr15 | 97923019  | 97962878  | Pfkm          |
| 97510561 | 97946300  | chr15 | 97623094  | 97674933  | Hdac7         |
| 97510561 | 97946300  | chr15 | 97869174  | 97924000  | Senp1         |
| 97510561 | 97946300  | chr15 | 97505535  | 97536253  | Rpap3         |
| 98309148 | 98524944  | chr15 | 98310830  | 98313114  | Lalba         |
| 98309148 | 98524944  | chr15 | 98327904  | 98328837  | Olfr279       |
| 98309148 | 98524944  | chr15 | 98350147  | 98350265  | Snora34       |
| 98309148 | 98524944  | chr15 | 98350192  | 98350309  | Mir1291       |
| 98309148 | 98524944  | chr15 | 98356778  | 98356890  | Snora2b       |
| 98309148 | 98524944  | chr15 | 98397754  | 98401295  | 9330020H09Rik |
| 98309148 | 98524944  | chr15 | 98349531  | 98364652  | Kansl2        |
| 98309148 | 98524944  | chr15 | 98373641  | 98398067  | Ccnt1         |
| 98309148 | 98524944  | chr15 | 98401434  | 98420019  | 4930415O20Rik |
| 98309148 | 98524944  | chr15 | 98462758  | 98474967  | Cacnb3        |
| 98309148 | 98524944  | chr15 | 98475937  | 98493320  | Ddx23         |
| 98309148 | 98524944  | chr15 | 98499635  | 98507892  | Rnd1          |
| 98309148 | 98524944  | chr15 | 98420420  | 98438064  | Adcy6         |
| 98567254 | 101484115 | chr15 | 98602182  | 98608581  | Wnt10b        |
| 98567254 | 101484115 | chr15 | 98620287  | 98624261  | Wnt1          |
| 98567254 | 101484115 | chr15 | 98634212  | 98638356  | Ddn           |
| 98567254 | 101484115 | chr15 | 98708190  | 98711845  | Rhebl1        |
| 98567254 | 101484115 | chr15 | 98723457  | 98728971  | Dhh           |
| 98567254 | 101484115 | chr15 | 98780277  | 98783932  | Tuba1a        |
| 98567254 | 101484115 | chr15 | 98816395  | 98819712  | 4930578M01Rik |
| 98567254 | 101484115 | chr15 | 98885604  | 98889409  | Prph          |
| 98567254 | 101484115 | chr15 | 98911235  | 98911296  | Mir6960       |
| 98567254 | 101484115 | chr15 | 98915184  | 98918159  | C1ql4         |
| 98567254 | 101484115 | chr15 | 98929914  | 98935138  | Dnajc22       |
| 98567254 | 101484115 | chr15 | 99409486  | 99414976  | Aqp2          |
| 98567254 | 101484115 | chr15 | 99421458  | 99425260  | Aqp5          |
| 98567254 | 101484115 | chr15 | 99556048  | 99558567  | Cox14         |
| 98567254 | 101484115 | chr15 | 99748778  | 99762089  | 1700030F18Rik |
| 98567254 | 101484115 | chr15 | 99802597  | 99803718  | 2310068J16Rik |
| 98567254 | 101484115 | chr15 | 100165359 | 100170600 | Mettl7a3      |
| 98567254 | 101484115 | chr15 | 100405748 | 100416796 | Pou6f1        |
| 98567254 | 101484115 | chr15 | 100444570 | 100445541 | C330013E15Rik |
| 98567254 | 101484115 | chr15 | 100479593 | 100479660 | Mir6961       |
| 98567254 | 101484115 | chr15 | 100560935 | 100563168 | I730030J21Rik |

|          |           |       |           |           |                |
|----------|-----------|-------|-----------|-----------|----------------|
| 98567254 | 101484115 | chr15 | 100880622 | 100884830 | Figl2          |
| 98567254 | 101484115 | chr15 | 100946185 | 100950455 | Ankrd33        |
| 98567254 | 101484115 | chr15 | 101024299 | 101024362 | Mir6962        |
| 98567254 | 101484115 | chr15 | 101051621 | 101055617 | A330009N23Rik  |
| 98567254 | 101484115 | chr15 | 101051677 | 101052586 | AU021063       |
| 98567254 | 101484115 | chr15 | 101097276 | 101105225 | Nr4a1          |
| 98567254 | 101484115 | chr15 | 101114731 | 101121365 | 9430023L20Rik  |
| 98567254 | 101484115 | chr15 | 101123642 | 101127857 | 6030408B16Rik  |
| 98567254 | 101484115 | chr15 | 101199782 | 101199865 | Mir1941        |
| 98567254 | 101484115 | chr15 | 101261920 | 101269235 | Krt83          |
| 98567254 | 101484115 | chr15 | 101278175 | 101284340 | 1700011A15Rik  |
| 98567254 | 101484115 | chr15 | 101289491 | 101294196 | Krt81          |
| 98567254 | 101484115 | chr15 | 101303908 | 101310414 | Krt86          |
| 98567254 | 101484115 | chr15 | 101355456 | 101363251 | Krt84          |
| 98567254 | 101484115 | chr15 | 101371655 | 101381090 | Krt82          |
| 98567254 | 101484115 | chr15 | 101417747 | 101419003 | Gm5476         |
| 98567254 | 101484115 | chr15 | 101439304 | 101440910 | Gm5477         |
| 98567254 | 101484115 | chr15 | 101454458 | 101458619 | Gm5414         |
| 98567254 | 101484115 | chr15 | 101473450 | 101477811 | Gm5478         |
| 98567254 | 101484115 | chr15 | 98568056  | 98593549  | Arf3           |
| 98567254 | 101484115 | chr15 | 98643227  | 98661939  | Prkag1         |
| 98567254 | 101484115 | chr15 | 98734351  | 98748529  | Lmbr1l         |
| 98567254 | 101484115 | chr15 | 98761861  | 98764821  | Tuba1b         |
| 98567254 | 101484115 | chr15 | 98860321  | 98868536  | Tuba1c         |
| 98567254 | 101484115 | chr15 | 98905403  | 98913840  | Troap          |
| 98567254 | 101484115 | chr15 | 99055406  | 99073248  | Kcnh3          |
| 98567254 | 101484115 | chr15 | 99073247  | 99082392  | Mcrs1          |
| 98567254 | 101484115 | chr15 | 99101448  | 99117611  | Fam186b        |
| 98567254 | 101484115 | chr15 | 99125839  | 99147438  | Prpf40b        |
| 98567254 | 101484115 | chr15 | 99147653  | 99200897  | Fmnl3          |
| 98567254 | 101484115 | chr15 | 99223377  | 99240480  | Tmbim6         |
| 98567254 | 101484115 | chr15 | 99252464  | 99288179  | Nckap5l        |
| 98567254 | 101484115 | chr15 | 99300514  | 99305161  | Bcdin3d        |
| 98567254 | 101484115 | chr15 | 99431830  | 99435908  | Aqp6           |
| 98567254 | 101484115 | chr15 | 99450927  | 99482087  | Racgap1        |
| 98567254 | 101484115 | chr15 | 99501148  | 99531559  | Asic1          |
| 98567254 | 101484115 | chr15 | 99532717  | 99544426  | Smarcd1        |
| 98567254 | 101484115 | chr15 | 99548023  | 99555438  | Gpd1           |
| 98567254 | 101484115 | chr15 | 99566022  | 99602946  | Cers5          |
| 98567254 | 101484115 | chr15 | 99800495  | 99846789  | Larp4          |
| 98567254 | 101484115 | chr15 | 99803210  | 99846789  | Larp4          |
| 98567254 | 101484115 | chr15 | 100058289 | 100091679 | Atf1           |
| 98567254 | 101484115 | chr15 | 100111267 | 100123484 | Tmprss12       |
| 98567254 | 101484115 | chr15 | 100183630 | 100192250 | Mettl7a2       |
| 98567254 | 101484115 | chr15 | 100183630 | 100214866 | Mettl7a2Higd1c |
| 98567254 | 101484115 | chr15 | 100195015 | 100214386 | Higd1c         |
| 98567254 | 101484115 | chr15 | 100218330 | 100253486 | Slc11a2        |

|           |           |       |           |           |               |
|-----------|-----------|-------|-----------|-----------|---------------|
| 98567254  | 101484115 | chr15 | 100253623 | 100258581 | Gm5475        |
| 98567254  | 101484115 | chr15 | 100299464 | 100309683 | Letmd1        |
| 98567254  | 101484115 | chr15 | 100310000 | 100325670 | Csrnp2        |
| 98567254  | 101484115 | chr15 | 100333226 | 100382378 | Tfcp2         |
| 98567254  | 101484115 | chr15 | 100446092 | 100451192 | Dazap2        |
| 98567254  | 101484115 | chr15 | 100451770 | 100467371 | Smagp         |
| 98567254  | 101484115 | chr15 | 100471512 | 100499931 | Bin2          |
| 98567254  | 101484115 | chr15 | 100504852 | 100518351 | Cela1         |
| 98567254  | 101484115 | chr15 | 100592177 | 100654402 | Slc4a8        |
| 98567254  | 101484115 | chr15 | 100958952 | 100975767 | Acvrl1        |
| 98567254  | 101484115 | chr15 | 101004555 | 101043032 | Acvr1b        |
| 98567254  | 101484115 | chr15 | 101242833 | 101258237 | Krt7          |
| 98567254  | 101484115 | chr15 | 101334246 | 101336744 | Gm6042        |
| 98567254  | 101484115 | chr15 | 101382786 | 101393381 | 4732456N10Rik |
| 98567254  | 101484115 | chr15 | 101393773 | 101404335 | Krt75         |
| 98567254  | 101484115 | chr15 | 98662099  | 98701636  | Kmt2d         |
| 98567254  | 101484115 | chr15 | 98957275  | 99042897  | Spats2        |
| 98567254  | 101484115 | chr15 | 99082218  | 99092472  | 1700120C14Rik |
| 98567254  | 101484115 | chr15 | 99327435  | 99358596  | Faim2         |
| 98567254  | 101484115 | chr15 | 99869094  | 100049904 | Dip2b         |
| 98567254  | 101484115 | chr15 | 100135247 | 100144779 | Mettl7a1      |
| 98567254  | 101484115 | chr15 | 100520345 | 100559807 | Galnt6        |
| 98567254  | 101484115 | chr15 | 100701075 | 100876369 | Scn8a         |
| 98567254  | 101484115 | chr15 | 101054637 | 101063187 | Grasp         |
| 98567254  | 101484115 | chr15 | 101180001 | 101200556 | Krt80         |
| 98567254  | 101484115 | chr15 | 101315560 | 101321943 | 5430421N21Rik |
| 98567254  | 101484115 | chr15 | 101346118 | 101521940 | Krt85         |
| 98567254  | 101484115 | chr15 | 99608898  | 99705887  | Lima1         |
| 101639851 | 102782461 | chr15 | 101714781 | 101723351 | Krt76         |
| 101639851 | 102782461 | chr15 | 101748965 | 101755166 | Krt4          |
| 101639851 | 102782461 | chr15 | 101827141 | 101834773 | Krt8          |
| 101639851 | 102782461 | chr15 | 101974616 | 101979943 | Igfbp6        |
| 101639851 | 102782461 | chr15 | 102007428 | 102019474 | Csad          |
| 101639851 | 102782461 | chr15 | 102109886 | 102112175 | Mfsd5         |
| 101639851 | 102782461 | chr15 | 102156546 | 102161920 | Pfdn5         |
| 101639851 | 102782461 | chr15 | 102162139 | 102168569 | Myg1          |
| 101639851 | 102782461 | chr15 | 102187607 | 102196702 | Sp7           |
| 101639851 | 102782461 | chr15 | 102275797 | 102285070 | Amhr2         |
| 101639851 | 102782461 | chr15 | 102289600 | 102293237 | Prr13         |
| 101639851 | 102782461 | chr15 | 102354269 | 102355373 | Npff          |
| 101639851 | 102782461 | chr15 | 102502222 | 102502297 | Mir688        |
| 101639851 | 102782461 | chr15 | 102576871 | 102577340 | Cistr-act     |
| 101639851 | 102782461 | chr15 | 102751561 | 102759245 | Hoxc13        |
| 101639851 | 102782461 | chr15 | 102767283 | 102768948 | Hoxc12        |
| 101639851 | 102782461 | chr15 | 101641119 | 101648600 | Krt2          |
| 101639851 | 102782461 | chr15 | 101675856 | 101681217 | Krt1          |
| 101639851 | 102782461 | chr15 | 101690286 | 101700049 | Krt77         |

|           |           |       |           |           |               |
|-----------|-----------|-------|-----------|-----------|---------------|
| 101639851 | 102782461 | chr15 | 101759762 | 101770755 | Krt79         |
| 101639851 | 102782461 | chr15 | 101776434 | 101784718 | Krt78         |
| 101639851 | 102782461 | chr15 | 101858646 | 101862457 | Krt18         |
| 101639851 | 102782461 | chr15 | 101904203 | 101927604 | Eif4b         |
| 101639851 | 102782461 | chr15 | 101933418 | 101946832 | Tenc1         |
| 101639851 | 102782461 | chr15 | 101946958 | 101966646 | Spryd3        |
| 101639851 | 102782461 | chr15 | 101981005 | 101993867 | Soat2         |
| 101639851 | 102782461 | chr15 | 102038697 | 102046032 | Zfp740        |
| 101639851 | 102782461 | chr15 | 102046425 | 102062366 | Itgb7         |
| 101639851 | 102782461 | chr15 | 102065368 | 102087953 | Rarg          |
| 101639851 | 102782461 | chr15 | 102126723 | 102154787 | Espl1         |
| 101639851 | 102782461 | chr15 | 102168677 | 102181190 | Aaas          |
| 101639851 | 102782461 | chr15 | 102236746 | 102266835 | Sp1           |
| 101639851 | 102782461 | chr15 | 102301062 | 102330490 | Pcbp2         |
| 101639851 | 102782461 | chr15 | 102328077 | 102347435 | Map3k12       |
| 101639851 | 102782461 | chr15 | 102348622 | 102354107 | Tarbp2        |
| 101639851 | 102782461 | chr15 | 102537207 | 102552609 | Calcoco1      |
| 101639851 | 102782461 | chr15 | 102774492 | 102778377 | Hotair        |
| 101639851 | 102782461 | chr15 | 102367074 | 102455852 | Atf7          |
| 101639851 | 102782461 | chr15 | 102493298 | 102501478 | Atp5g2        |
| 103046339 | 103369550 | chr15 | 103078648 | 103085847 | Nfe2          |
| 103046339 | 103369550 | chr15 | 103115555 | 103115652 | Mir148b       |
| 103046339 | 103369550 | chr15 | 103138665 | 103140869 | Gpr84         |
| 103046339 | 103369550 | chr15 | 103180885 | 103180956 | Mir6963       |
| 103046339 | 103369550 | chr15 | 103269390 | 103278890 | BC048502      |
| 103046339 | 103369550 | chr15 | 103070827 | 103077129 | Hnrnpa1       |
| 103046339 | 103369550 | chr15 | 103070862 | 103075015 | Gm10052       |
| 103046339 | 103369550 | chr15 | 103070884 | 103075386 | Gm5643        |
| 103046339 | 103369550 | chr15 | 103103348 | 103130295 | Copz1         |
| 103046339 | 103369550 | chr15 | 103174717 | 103197179 | Itga5         |
| 103046339 | 103369550 | chr15 | 103232889 | 103260858 | Gtsf1         |
| 103046339 | 103369550 | chr15 | 103333464 | 103360487 | Pde1b         |
| 103046339 | 103369550 | chr15 | 103360709 | 103368423 | Ppp1r1a       |
| 103046339 | 103369550 | chr15 | 103021976 | 103070247 | Cbx5          |
| 103046339 | 103369550 | chr15 | 103144325 | 103170517 | Zfp385a       |
| 103046339 | 103369550 | chr15 | 103284255 | 103329231 | Nckap1l       |
| 14818340  | 15159972  | chr16 | 14906738  | 14924615  | Efcab1        |
| 30586719  | 30894697  | chr16 | 30599808  | 30602883  | Fam43a        |
| 30586719  | 30894697  | chr16 | 30561454  | 30587675  | Lsg1          |
| 35434995  | 35656979  | chr16 | 35397397  | 35490959  | Pdia5         |
| 35434995  | 35656979  | chr16 | 35503255  | 35509505  | 1600019K03Rik |
| 35434995  | 35656979  | chr16 | 35541447  | 35664344  | Sema5b        |
| 91922173  | 92350733  | chr16 | 92292633  | 92298378  | Kcne2         |
| 91922173  | 92350733  | chr16 | 92308960  | 92312711  | 1700048M11Rik |
| 91922173  | 92350733  | chr16 | 92319007  | 92321686  | 4930563D23Rik |
| 91922173  | 92350733  | chr16 | 91925467  | 91931875  | Atp5o         |
| 91922173  | 92350733  | chr16 | 92058566  | 92087718  | Slc5a3        |

|          |          |       |          |          |               |
|----------|----------|-------|----------|----------|---------------|
| 91922173 | 92350733 | chr16 | 92058580 | 92112472 | Mrps6         |
| 91922173 | 92350733 | chr16 | 92301547 | 92313286 | Smim11        |
| 91922173 | 92350733 | chr16 | 92346245 | 92359713 | Kcne1         |
| 25932014 | 26515103 | chr17 | 25931515 | 25933990 | Metrn         |
| 25932014 | 26515103 | chr17 | 25960571 | 25965675 | Wdr24         |
| 25932014 | 26515103 | chr17 | 25968309 | 25968373 | Mir3082       |
| 25932014 | 26515103 | chr17 | 25971409 | 25974072 | Rhbd1         |
| 25932014 | 26515103 | chr17 | 25975782 | 25981796 | Rhot2         |
| 25932014 | 26515103 | chr17 | 26012444 | 26014108 | O610011F06Rik |
| 25932014 | 26515103 | chr17 | 26038800 | 26039172 | Gm10012       |
| 25932014 | 26515103 | chr17 | 26079177 | 26081876 | Nhlrc4        |
| 25932014 | 26515103 | chr17 | 26218155 | 26227109 | Decr2         |
| 25932014 | 26515103 | chr17 | 26250260 | 26260198 | Tmem8         |
| 25932014 | 26515103 | chr17 | 26332943 | 26336032 | Pdia2         |
| 25932014 | 26515103 | chr17 | 26336127 | 26338295 | Arhgdig       |
| 25932014 | 26515103 | chr17 | 25965987 | 25968788 | Jmjd8         |
| 25932014 | 26515103 | chr17 | 25967580 | 25970306 | Stub1         |
| 25932014 | 26515103 | chr17 | 25981678 | 25998460 | Wdr90         |
| 25932014 | 26515103 | chr17 | 26000642 | 26005683 | Fam195a       |
| 25932014 | 26515103 | chr17 | 26014572 | 26017803 | Wfikkn1       |
| 25932014 | 26515103 | chr17 | 26019058 | 26056659 | Rab40c        |
| 25932014 | 26515103 | chr17 | 26063368 | 26078907 | Pigq          |
| 25932014 | 26515103 | chr17 | 26096500 | 26102450 | Capn15        |
| 25932014 | 26515103 | chr17 | 26125980 | 26206122 | Rab11fip3     |
| 25932014 | 26515103 | chr17 | 26228689 | 26232415 | Nme4          |
| 25932014 | 26515103 | chr17 | 26260447 | 26263558 | Mrpl28        |
| 25932014 | 26515103 | chr17 | 26275630 | 26332756 | Axin1         |
| 25932014 | 26515103 | chr17 | 26349636 | 26381187 | Itfg3         |
| 25932014 | 26515103 | chr17 | 26389854 | 26422451 | Luc7l         |
| 25932014 | 26515103 | chr17 | 25946029 | 25958210 | Fbxl16        |
| 25932014 | 26515103 | chr17 | 26339906 | 26348269 | Rgs11         |
| 26618364 | 27508368 | chr17 | 26642535 | 26645417 | Dusp1         |
| 26618364 | 27508368 | chr17 | 26975609 | 26978510 | Nkx2-5        |
| 26618364 | 27508368 | chr17 | 27070071 | 27074835 | Phf1          |
| 26618364 | 27508368 | chr17 | 27072416 | 27072484 | Mir6968       |
| 26618364 | 27508368 | chr17 | 27074916 | 27076483 | Cuta          |
| 26618364 | 27508368 | chr17 | 27085000 | 27085064 | Mir3083       |
| 26618364 | 27508368 | chr17 | 27110123 | 27113148 | Zbtb9         |
| 26618364 | 27508368 | chr17 | 27166203 | 27173323 | Ggnbp1        |
| 26618364 | 27508368 | chr17 | 27228189 | 27228256 | Mir7677       |
| 26618364 | 27508368 | chr17 | 27453979 | 27454040 | Mir7214       |
| 26618364 | 27508368 | chr17 | 27465329 | 27465405 | Mir7216       |
| 26618364 | 27508368 | chr17 | 27492682 | 27492744 | Mir7217       |
| 26618364 | 27508368 | chr17 | 27495041 | 27495100 | Mir7218       |
| 26618364 | 27508368 | chr17 | 26813340 | 26836591 | Atp6v0e       |
| 26618364 | 27508368 | chr17 | 26918023 | 26929466 | Bnip1         |
| 26618364 | 27508368 | chr17 | 27054035 | 27069524 | Kifc5b        |

|          |          |       |          |          |               |
|----------|----------|-------|----------|----------|---------------|
| 26618364 | 27508368 | chr17 | 27078396 | 27107590 | Syngap1       |
| 26618364 | 27508368 | chr17 | 27154979 | 27173322 | Ggnbp1        |
| 26618364 | 27508368 | chr17 | 27156756 | 27165571 | Bak1          |
| 26618364 | 27508368 | chr17 | 27194248 | 27259168 | Itpr3         |
| 26618364 | 27508368 | chr17 | 27280915 | 27304709 | Ip6k3         |
| 26618364 | 27508368 | chr17 | 27326544 | 27341383 | Lemd2         |
| 26618364 | 27508368 | chr17 | 26698456 | 26793878 | Ergic1        |
| 26618364 | 27508368 | chr17 | 26852594 | 26913571 | Crebrf        |
| 26618364 | 27508368 | chr17 | 27259609 | 27270836 | Uqcc2         |
| 27898539 | 29315727 | chr17 | 28038072 | 28044669 | Taf11         |
| 27898539 | 29315727 | chr17 | 28465415 | 28467978 | Rpl10a        |
| 27898539 | 29315727 | chr17 | 28695158 | 28697659 | Clps          |
| 27898539 | 29315727 | chr17 | 28695385 | 28695446 | Mir6969       |
| 27898539 | 29315727 | chr17 | 28712663 | 28720538 | Lhfpl5        |
| 27898539 | 29315727 | chr17 | 28906261 | 28915649 | Mapk13        |
| 27898539 | 29315727 | chr17 | 29042209 | 29043716 | 1700030A11Rik |
| 27898539 | 29315727 | chr17 | 29070930 | 29079207 | Pxt1          |
| 27898539 | 29315727 | chr17 | 27977031 | 27988912 | Snrpc         |
| 27898539 | 29315727 | chr17 | 27993451 | 28036985 | Uhrf1bp1      |
| 27898539 | 29315727 | chr17 | 28203691 | 28217584 | Tcp11         |
| 27898539 | 29315727 | chr17 | 28279470 | 28308290 | Scube3        |
| 27898539 | 29315727 | chr17 | 28314362 | 28342831 | Zfp523        |
| 27898539 | 29315727 | chr17 | 28344722 | 28365553 | Def6          |
| 27898539 | 29315727 | chr17 | 28369698 | 28438414 | Ppard         |
| 27898539 | 29315727 | chr17 | 28408652 | 28410108 | 1810013A23Rik |
| 27898539 | 29315727 | chr17 | 28450474 | 28463519 | Fance         |
| 27898539 | 29315727 | chr17 | 28468617 | 28487750 | Tead3         |
| 27898539 | 29315727 | chr17 | 28488463 | 28502088 | Tulp1         |
| 27898539 | 29315727 | chr17 | 28667805 | 28675920 | Armc12        |
| 27898539 | 29315727 | chr17 | 28686431 | 28689563 | Clpsl2        |
| 27898539 | 29315727 | chr17 | 28726536 | 28759399 | Srpk1         |
| 27898539 | 29315727 | chr17 | 28995355 | 29027253 | Pnpla1        |
| 27898539 | 29315727 | chr17 | 29033339 | 29052269 | 4930539E08Rik |
| 27898539 | 29315727 | chr17 | 29107829 | 29144882 | Stk38         |
| 27898539 | 29315727 | chr17 | 29169604 | 29180317 | Srsf3         |
| 27898539 | 29315727 | chr17 | 29194418 | 29215906 | Gm16197       |
| 27898539 | 29315727 | chr17 | 29272000 | 29285921 | Rab44         |
| 27898539 | 29315727 | chr17 | 27888176 | 27957487 | D17Wsu92e     |
| 27898539 | 29315727 | chr17 | 28046250 | 28199724 | Anks1         |
| 27898539 | 29315727 | chr17 | 28535697 | 28623094 | Fkbp5         |
| 27898539 | 29315727 | chr17 | 28828286 | 28885350 | Mapk14        |
| 27898539 | 29315727 | chr17 | 28938070 | 28975734 | Brpf3         |
| 27898539 | 29315727 | chr17 | 29090160 | 29104882 | Kctd20        |
| 27898539 | 29315727 | chr17 | 29227930 | 29237667 | Cdkn1a        |
| 27898539 | 29315727 | chr17 | 29293465 | 29374735 | Cpne5         |
| 31803155 | 32585861 | chr17 | 32378864 | 32379800 | Gm4432        |
| 31803155 | 32585861 | chr17 | 32539958 | 32541753 | A530088E08Rik |



|          |          |       |          |          |               |
|----------|----------|-------|----------|----------|---------------|
| 31803155 | 32585861 | chr17 | 31814875 | 31818675 | Cryaa         |
| 31803155 | 32585861 | chr17 | 32173106 | 32199807 | Rrp1b         |
| 31803155 | 32585861 | chr17 | 32213027 | 32228368 | Pdxk-ps       |
| 31803155 | 32585861 | chr17 | 32257837 | 32303797 | Notch3        |
| 31803155 | 32585861 | chr17 | 32320714 | 32326408 | Ephx3         |
| 31803155 | 32585861 | chr17 | 32440620 | 32458098 | Akap8         |
| 31803155 | 32585861 | chr17 | 32458368 | 32487522 | Akap8l        |
| 31803155 | 32585861 | chr17 | 32527605 | 32540526 | Rasal3        |
| 31803155 | 32585861 | chr17 | 32549405 | 32561112 | Pglyrp2       |
| 31803155 | 32585861 | chr17 | 31981194 | 31992737 | Sik1          |
| 31803155 | 32585861 | chr17 | 32081713 | 32171453 | Hsf2bp        |
| 31803155 | 32585861 | chr17 | 32333216 | 32421078 | Brd4          |
| 31803155 | 32585861 | chr17 | 32490994 | 32526384 | Wiz           |
| 34145924 | 34320952 | chr17 | 34161927 | 34162037 | Mir219-1      |
| 34145924 | 34320952 | chr17 | 34161956 | 34162016 | Mir219c       |
| 34145924 | 34320952 | chr17 | 34162977 | 34165000 | H2-Ke6        |
| 34145924 | 34320952 | chr17 | 34165210 | 34168635 | Slc39a7       |
| 34145924 | 34320952 | chr17 | 34168756 | 34175348 | Rxb           |
| 34145924 | 34320952 | chr17 | 34229323 | 34232179 | H2-Oa         |
| 34145924 | 34320952 | chr17 | 34282360 | 34288040 | H2-DMb2       |
| 34145924 | 34320952 | chr17 | 34319043 | 34324275 | Psmb9         |
| 34145924 | 34320952 | chr17 | 34157736 | 34161625 | Ring1         |
| 34145924 | 34320952 | chr17 | 34176381 | 34203187 | Col11a2       |
| 34145924 | 34320952 | chr17 | 34220787 | 34232254 | BC051537      |
| 34145924 | 34320952 | chr17 | 34248963 | 34259552 | Brd2          |
| 34145924 | 34320952 | chr17 | 34259776 | 34276046 | H2-DMa        |
| 34145924 | 34320952 | chr17 | 34290135 | 34297174 | H2-DMb1       |
| 45960564 | 46384396 | chr17 | 46153942 | 46169326 | Vegfa         |
| 45960564 | 46384396 | chr17 | 46368479 | 46368568 | Mir693        |
| 45960564 | 46384396 | chr17 | 46247952 | 46265857 | Mrps18a       |
| 45960564 | 46384396 | chr17 | 46284333 | 46290500 | Mad2l1bp      |
| 45960564 | 46384396 | chr17 | 46297980 | 46306319 | Gtpbp2        |
| 45960564 | 46384396 | chr17 | 46308941 | 46339574 | Polh          |
| 45960564 | 46384396 | chr17 | 46339803 | 46379248 | Xpo5          |
| 45960564 | 46384396 | chr17 | 46380868 | 46384994 | Polr1c        |
| 45960564 | 46384396 | chr17 | 46266225 | 46281147 | Rsph9         |
| 47275477 | 47483502 | chr17 | 47277890 | 47496407 | Trerf1        |
| 47663655 | 47778226 | chr17 | 47736279 | 47748441 | Bysl          |
| 47663655 | 47778226 | chr17 | 47748544 | 47761367 | Med20         |
| 47663655 | 47778226 | chr17 | 47767638 | 47821016 | Usp49         |
| 47663655 | 47778226 | chr17 | 47641999 | 47736637 | Ccnd3         |
| 79571244 | 80860309 | chr17 | 79874963 | 79877225 | 4930429F11Rik |
| 79571244 | 80860309 | chr17 | 79905388 | 79909826 | Gm10494       |
| 79571244 | 80860309 | chr17 | 80106292 | 80114381 | Cyp1b1        |
| 79571244 | 80860309 | chr17 | 80599419 | 80606645 | Srsf7         |
| 79571244 | 80860309 | chr17 | 80615253 | 80617276 | Ttc39d        |
| 79571244 | 80860309 | chr17 | 80771196 | 80772882 | Gm10190       |

|          |          |       |          |          |               |
|----------|----------|-------|----------|----------|---------------|
| 79571244 | 80860309 | chr17 | 79733364 | 79754431 | Cdc42ep3      |
| 79571244 | 80860309 | chr17 | 80014239 | 80081492 | Rmdn2         |
| 79571244 | 80860309 | chr17 | 80247729 | 80295463 | Atl2          |
| 79571244 | 80860309 | chr17 | 80428826 | 80461674 | HnrnpII       |
| 79571244 | 80860309 | chr17 | 80526810 | 80584372 | Galm          |
| 79571244 | 80860309 | chr17 | 80623828 | 80627837 | Gemin6        |
| 79571244 | 80860309 | chr17 | 80637643 | 80689816 | Dhx57         |
| 79571244 | 80860309 | chr17 | 80689551 | 80696816 | Morn2         |
| 79571244 | 80860309 | chr17 | 80793091 | 80879793 | Sos1          |
| 79571244 | 80860309 | chr17 | 80706746 | 80788029 | Arhgef33      |
| 81866841 | 82929835 | chr17 | 81772444 | 82137727 | Slc8a1        |
| 84096173 | 85014310 | chr17 | 84230693 | 84246130 | Haa0          |
| 84096173 | 85014310 | chr17 | 84477999 | 84489215 | 4933433H22Rik |
| 84096173 | 85014310 | chr17 | 84583268 | 84587287 | Zfp36l2       |
| 84096173 | 85014310 | chr17 | 84105502 | 84214245 | Mta3          |
| 84096173 | 85014310 | chr17 | 84589395 | 84865548 | Thada         |
| 84096173 | 85014310 | chr17 | 84911234 | 85021482 | Plekhh2       |
| 3316144  | 3771890  | chr19 | 3409916  | 3414457  | Gal           |
| 3316144  | 3771890  | chr19 | 3708332  | 3717881  | 1810055G02Rik |
| 3316144  | 3771890  | chr19 | 3323300  | 3385733  | Cpt1a         |
| 3316144  | 3771890  | chr19 | 3388856  | 3407823  | Mtl5          |
| 3316144  | 3771890  | chr19 | 3454927  | 3575749  | Ppp6r3        |
| 3316144  | 3771890  | chr19 | 3584824  | 3686564  | Lrp5          |
| 3316144  | 3771890  | chr19 | 3767420  | 3818303  | Suv420h1      |
| 3942471  | 5513101  | chr19 | 3986660  | 3990005  | Acy3          |
| 3942471  | 5513101  | chr19 | 4000579  | 4002102  | Nudt8         |
| 3942471  | 5513101  | chr19 | 4003384  | 4007005  | Doc2g         |
| 3942471  | 5513101  | chr19 | 4007498  | 4012755  | Ndufv1        |
| 3942471  | 5513101  | chr19 | 4035410  | 4037912  | Gstp1         |
| 3942471  | 5513101  | chr19 | 4040287  | 4042221  | Gstp2         |
| 3942471  | 5513101  | chr19 | 4057486  | 4059294  | BC021614      |
| 3942471  | 5513101  | chr19 | 4082487  | 4087339  | Cabp2         |
| 3942471  | 5513101  | chr19 | 4097350  | 4099017  | Cdk2ap2       |
| 3942471  | 5513101  | chr19 | 4113755  | 4125858  | Aip           |
| 3942471  | 5513101  | chr19 | 4135422  | 4139609  | Cabp4         |
| 3942471  | 5513101  | chr19 | 4148662  | 4154035  | Coro1b        |
| 3942471  | 5513101  | chr19 | 4154645  | 4156710  | Ptprcap       |
| 3942471  | 5513101  | chr19 | 4164323  | 4175479  | Carns1        |
| 3942471  | 5513101  | chr19 | 4184356  | 4191047  | Tbc1d10c      |
| 3942471  | 5513101  | chr19 | 4195197  | 4201603  | Rad9a         |
| 3942471  | 5513101  | chr19 | 4214391  | 4222615  | Clcf1         |
| 3942471  | 5513101  | chr19 | 4231898  | 4233634  | Pold4         |
| 3942471  | 5513101  | chr19 | 4261667  | 4269172  | Ssh3          |
| 3942471  | 5513101  | chr19 | 4263817  | 4263878  | Mir6985       |
| 3942471  | 5513101  | chr19 | 4425456  | 4439424  | Rhod          |
| 3942471  | 5513101  | chr19 | 4496787  | 4498583  | 2010003K11Rik |
| 3942471  | 5513101  | chr19 | 4611783  | 4615667  | Lrnf4         |

|         |         |       |         |         |               |
|---------|---------|-------|---------|---------|---------------|
| 3942471 | 5513101 | chr19 | 4622550 | 4625617 | Rce1          |
| 3942471 | 5513101 | chr19 | 4623897 | 4623955 | Mir6986       |
| 3942471 | 5513101 | chr19 | 4756524 | 4765940 | Rbm4b         |
| 3942471 | 5513101 | chr19 | 4784292 | 4793877 | Rbm4          |
| 3942471 | 5513101 | chr19 | 4800924 | 4811634 | Rbm14         |
| 3942471 | 5513101 | chr19 | 4839365 | 4842528 | Ccdc87        |
| 3942471 | 5513101 | chr19 | 4855128 | 4860912 | Ctsf          |
| 3942471 | 5513101 | chr19 | 4931854 | 4943092 | Peli3         |
| 3942471 | 5513101 | chr19 | 4984354 | 4989971 | Npas4         |
| 3942471 | 5513101 | chr19 | 5038825 | 5041134 | B3gnt1        |
| 3942471 | 5513101 | chr19 | 5050807 | 5057071 | Rin1          |
| 3942471 | 5513101 | chr19 | 5068077 | 5070639 | Cd248         |
| 3942471 | 5513101 | chr19 | 5079336 | 5085477 | Tmem151a      |
| 3942471 | 5513101 | chr19 | 5088537 | 5092879 | Yif1a         |
| 3942471 | 5513101 | chr19 | 5099206 | 5106996 | Rab1b         |
| 3942471 | 5513101 | chr19 | 5344704 | 5349574 | Cst6          |
| 3942471 | 5513101 | chr19 | 5364632 | 5366876 | Banf1         |
| 3942471 | 5513101 | chr19 | 5366812 | 5371511 | Eif1ad        |
| 3942471 | 5513101 | chr19 | 5377522 | 5388703 | Sart1         |
| 3942471 | 5513101 | chr19 | 5388335 | 5390069 | D330050I16Rik |
| 3942471 | 5513101 | chr19 | 5406814 | 5422847 | 4930481A15Rik |
| 3942471 | 5513101 | chr19 | 5425143 | 5427316 | Al837181      |
| 3942471 | 5513101 | chr19 | 5460606 | 5465052 | Fibp          |
| 3942471 | 5513101 | chr19 | 5465239 | 5468498 | Ctsw          |
| 3942471 | 5513101 | chr19 | 5474689 | 5481854 | Efemp2        |
| 3942471 | 5513101 | chr19 | 5482839 | 5488336 | Mus81         |
| 3942471 | 5513101 | chr19 | 5490454 | 5494031 | Cfl1          |
| 3942471 | 5513101 | chr19 | 5502768 | 5503787 | 1700020D05Rik |
| 3942471 | 5513101 | chr19 | 3935185 | 3949340 | Unc93b1       |
| 3942471 | 5513101 | chr19 | 3958807 | 3970438 | 1700055N04Rik |
| 3942471 | 5513101 | chr19 | 3972327 | 3981665 | Aldh3b2       |
| 3942471 | 5513101 | chr19 | 3992751 | 3999512 | Tbx10         |
| 3942471 | 5513101 | chr19 | 4099997 | 4113965 | Pitpnm1       |
| 3942471 | 5513101 | chr19 | 4125959 | 4132307 | Tmem134       |
| 3942471 | 5513101 | chr19 | 4139798 | 4145740 | Gpr152        |
| 3942471 | 5513101 | chr19 | 4156976 | 4163245 | Rps6kb2       |
| 3942471 | 5513101 | chr19 | 4270179 | 4283137 | Ankrd13d      |
| 3942471 | 5513101 | chr19 | 4286000 | 4305955 | Adrbk1        |
| 3942471 | 5513101 | chr19 | 4439322 | 4448325 | A930001C03Rik |
| 3942471 | 5513101 | chr19 | 4625840 | 4698668 | Gm960         |
| 3942471 | 5513101 | chr19 | 4825365 | 4839322 | Ccs           |
| 3942471 | 5513101 | chr19 | 4861215 | 4877909 | Actn3         |
| 3942471 | 5513101 | chr19 | 4878667 | 4885397 | Zdhhc24       |
| 3942471 | 5513101 | chr19 | 4886881 | 4906627 | Bbs1          |
| 3942471 | 5513101 | chr19 | 4907228 | 4928287 | Dpp3          |
| 3942471 | 5513101 | chr19 | 4962305 | 4966995 | Mrpl11        |
| 3942471 | 5513101 | chr19 | 5024005 | 5031972 | Slc29a2       |

|         |               |         |                  |
|---------|---------------|---------|------------------|
| 3942471 | 5513101 chr19 | 5041403 | 5049917 Brms1    |
| 3942471 | 5513101 chr19 | 5092870 | 5098418 Cnih2    |
| 3942471 | 5513101 chr19 | 5273920 | 5295455 Sf3b2    |
| 3942471 | 5513101 chr19 | 5298330 | 5308739 Gal3st3  |
| 3942471 | 5513101 chr19 | 5335740 | 5344153 Catsper1 |
| 3942471 | 5513101 chr19 | 5422823 | 5424916 Drap1    |
| 3942471 | 5513101 chr19 | 5447697 | 5455938 Fosl1    |
| 3942471 | 5513101 chr19 | 5453162 | 5457563 Ccdc85b  |
| 3942471 | 5513101 chr19 | 4316146 | 4397077 Kdm2a    |
| 3942471 | 5513101 chr19 | 4445907 | 4477143 Syt12    |
| 3942471 | 5513101 chr19 | 4510471 | 4621752 Pcx      |
| 3942471 | 5513101 chr19 | 4711222 | 4752352 Sptbn2   |
| 3942471 | 5513101 chr19 | 5107745 | 5118408 Klc2     |
| 3942471 | 5513101 chr19 | 5495277 | 5510489 Snx32    |
| 3942471 | 5513101 chr19 | 4192173 | 4195419 Ppp1ca   |
| 3942471 | 5513101 chr19 | 5133684 | 5273119 Pacs1    |
| 5629802 | 6138116 chr19 | 5637489 | 5648130 Rela     |
| 5629802 | 6138116 chr19 | 5679003 | 5679076 Mir6987  |
| 5629802 | 6138116 chr19 | 5704475 | 5707101 Kcnk7    |
| 5629802 | 6138116 chr19 | 5728086 | 5729666 Fam89b   |
| 5629802 | 6138116 chr19 | 5730305 | 5731732 Sssca1   |
| 5629802 | 6138116 chr19 | 5842301 | 5845478 Neat1    |
| 5629802 | 6138116 chr19 | 5891137 | 5894107 Tigd3    |
| 5629802 | 6138116 chr19 | 5917555 | 5924816 Cdc42ep2 |
| 5629802 | 6138116 chr19 | 6046575 | 6053718 Syvn1    |
| 5629802 | 6138116 chr19 | 6051333 | 6051392 Mir6988  |
| 5629802 | 6138116 chr19 | 6053629 | 6057751 Mrpl49   |
| 5629802 | 6138116 chr19 | 6057887 | 6059524 Fau      |
| 5629802 | 6138116 chr19 | 6062820 | 6067850 Tm7sf2   |
| 5629802 | 6138116 chr19 | 6067841 | 6077187 Vps51    |
| 5629802 | 6138116 chr19 | 6080037 | 6080785 BC048609 |
| 5629802 | 6138116 chr19 | 6080762 | 6084891 Zfp11    |
| 5629802 | 6138116 chr19 | 6085096 | 6091773 Cdca5    |
| 5629802 | 6138116 chr19 | 6116003 | 6118586 Sac3d1   |
| 5629802 | 6138116 chr19 | 6134388 | 6141137 Arl2     |
| 5629802 | 6138116 chr19 | 5651184 | 5663707 Sipa1    |
| 5629802 | 6138116 chr19 | 5664634 | 5688908 Pcnxl3   |
| 5629802 | 6138116 chr19 | 5689130 | 5702864 Map3k11  |
| 5629802 | 6138116 chr19 | 5707373 | 5726317 Ehbp1l1  |
| 5629802 | 6138116 chr19 | 5740903 | 5758532 Ltbp3    |
| 5629802 | 6138116 chr19 | 5795689 | 5802671 Malat1   |
| 5629802 | 6138116 chr19 | 5850973 | 5875208 Frmd8    |
| 5629802 | 6138116 chr19 | 5878465 | 5885768 Slc25a45 |
| 5629802 | 6138116 chr19 | 5940542 | 5964206 Pola2    |
| 5629802 | 6138116 chr19 | 5970233 | 5986143 Slc22a20 |
| 5629802 | 6138116 chr19 | 5988544 | 6015825 Capn1    |
| 5629802 | 6138116 chr19 | 6012619 | 6018459 Gm10814  |

|          |                |          |                        |
|----------|----------------|----------|------------------------|
| 5629802  | 6138116 chr19  | 6061206  | 6062468 Znhit2         |
| 5629802  | 6138116 chr19  | 6105797  | 6115555 Naaladl1       |
| 5629802  | 6138116 chr19  | 6119403  | 6128215 Snx15          |
| 5629802  | 6138116 chr19  | 5758426  | 5771401 Scyl1          |
| 5629802  | 6138116 chr19  | 5897134  | 5912866 Dpf2           |
| 6334557  | 6507330 chr19  | 6341249  | 6353527 Map4k2         |
| 6334557  | 6507330 chr19  | 6346479  | 6346544 Mir6989        |
| 6334557  | 6507330 chr19  | 6334978  | 6340894 Men1           |
| 6334557  | 6507330 chr19  | 6363689  | 6378038 Sf1            |
| 6334557  | 6507330 chr19  | 6384428  | 6398459 Pygm           |
| 6334557  | 6507330 chr19  | 6400582  | 6415216 Rasgrp2        |
| 6334557  | 6507330 chr19  | 6418737  | 6533217 Nrnx2          |
| 43970768 | 44674206 chr19 | 44368165 | 44381352 Scd2          |
| 43970768 | 44674206 chr19 | 44377660 | 44377721 Mir5114       |
| 43970768 | 44674206 chr19 | 44468939 | 44482199 Scd1          |
| 43970768 | 44674206 chr19 | 44624743 | 44629905 Ndufb8        |
| 43970768 | 44674206 chr19 | 43921308 | 44014688 Dnmbp         |
| 43970768 | 44674206 chr19 | 44079511 | 44103737 Cyp2c44       |
| 43970768 | 44674206 chr19 | 44109432 | 44144275 Erlin1        |
| 43970768 | 44674206 chr19 | 44183126 | 44210366 Cwf19l1       |
| 43970768 | 44674206 chr19 | 44213736 | 44220936 Bloc1s2       |
| 43970768 | 44674206 chr19 | 44222126 | 44266932 Pkd2l1        |
| 43970768 | 44674206 chr19 | 44407815 | 44421233 Scd4          |
| 43970768 | 44674206 chr19 | 44567961 | 44588763 Wnt8b         |
| 43970768 | 44674206 chr19 | 44591446 | 44620338 Sec31b        |
| 43970768 | 44674206 chr19 | 44637343 | 44650764 Hif1an        |
| 43970768 | 44674206 chr19 | 44147823 | 44181967 Chuk          |
| 43970768 | 44674206 chr19 | 44277777 | 44318506 Scd3          |
| 43970768 | 44674206 chr19 | 44030797 | 44061010 Cpn1          |
| 44984272 | 45123726 chr19 | 45079503 | 45080932 Mrpl43        |
| 44984272 | 45123726 chr19 | 45081047 | 45087252 Peo1          |
| 44984272 | 45123726 chr19 | 45089665 | 45101594 Lzts2         |
| 44984272 | 45123726 chr19 | 45122065 | 45130873 Sfxn3         |
| 44984272 | 45123726 chr19 | 45005608 | 45058277 Fam178a       |
| 44984272 | 45123726 chr19 | 45046606 | 45059040 4930414N06Rik |
| 44984272 | 45123726 chr19 | 45063833 | 45077885 Sema4g        |
| 44984272 | 45123726 chr19 | 45101396 | 45120262 Pdzd7         |
| 45979703 | 46897040 chr19 | 46077967 | 46080663 Hps6          |
| 45979703 | 46897040 chr19 | 46107090 | 46119701 Ldb1          |
| 45979703 | 46897040 chr19 | 46206388 | 46210184 Elovl3        |
| 45979703 | 46897040 chr19 | 46402673 | 46404936 Fbxl15        |
| 45979703 | 46897040 chr19 | 46404301 | 46413150 Cuedc2        |
| 45979703 | 46897040 chr19 | 46417251 | 46417360 Mir146b       |
| 45979703 | 46897040 chr19 | 46422690 | 46423478 2310034G01Rik |
| 45979703 | 46897040 chr19 | 46150336 | 46160033 Nolc1         |
| 45979703 | 46897040 chr19 | 46210175 | 46222815 Pitx3         |
| 45979703 | 46897040 chr19 | 46379226 | 46386580 Nfkb2         |

|          |          |       |          |          |               |
|----------|----------|-------|----------|----------|---------------|
| 45979703 | 46897040 | chr19 | 46431369 | 46449744 | Tmem180       |
| 45979703 | 46897040 | chr19 | 46451303 | 46470225 | Actr1a        |
| 45979703 | 46897040 | chr19 | 46576137 | 46590945 | Trim8         |
| 45979703 | 46897040 | chr19 | 46605598 | 46647575 | Arl3          |
| 45979703 | 46897040 | chr19 | 46673595 | 46731879 | Wbp1l         |
| 45979703 | 46897040 | chr19 | 46741654 | 46747490 | Cyp17a1       |
| 45979703 | 46897040 | chr19 | 46764395 | 46777872 | 2010012O05Rik |
| 45979703 | 46897040 | chr19 | 45892633 | 46072978 | 9130011E15Rik |
| 45979703 | 46897040 | chr19 | 46227047 | 46361000 | Gbf1          |
| 45979703 | 46897040 | chr19 | 46386576 | 46401646 | Psd           |
| 45979703 | 46897040 | chr19 | 46471385 | 46563294 | Sufu          |
| 45979703 | 46897040 | chr19 | 46647854 | 46671390 | Sfxn2         |
| 45979703 | 46897040 | chr19 | 46781932 | 46815585 | As3mt         |
| 45979703 | 46897040 | chr19 | 46836098 | 46953070 | Cnm2          |
| 45979703 | 46897040 | chr19 | 46131028 | 46147399 | Pprc1         |
| 53781860 | 54026934 | chr19 | 54004148 | 54019117 | Bbip1         |
| 53781860 | 54026934 | chr19 | 54018795 | 54107768 | Shoc2         |
| 53781860 | 54026934 | chr19 | 53751795 | 53941570 | Rbm20         |
| 53781860 | 54026934 | chr19 | 53966720 | 54004351 | Pdcd4         |
| 55872793 | 56518841 | chr19 | 56362427 | 56394579 | Habp2         |
| 55872793 | 56518841 | chr19 | 56394530 | 56464528 | Nrap          |
| 55872793 | 56518841 | chr19 | 55816299 | 56008145 | Tcf7l2        |
| 55872793 | 56518841 | chr19 | 56471618 | 56516833 | Casp7         |
| 56625260 | 57324398 | chr19 | 56796861 | 56799352 | Adrb1         |
| 56625260 | 57324398 | chr19 | 56900698 | 56944502 | Tdrd1         |
| 56625260 | 57324398 | chr19 | 56948905 | 56986568 | Vwa2          |
| 56625260 | 57324398 | chr19 | 56865452 | 56888173 | A630007B06Rik |
| 56625260 | 57324398 | chr19 | 56986843 | 57083065 | Afap1l2       |
| 56625260 | 57324398 | chr19 | 57107753 | 57290522 | Ablim1        |
| 56625260 | 57324398 | chr19 | 56622750 | 56673336 | Nhlrc2        |
| 27422290 | 27781930 | chr2  | 27532720 | 27618839 | Rxra          |
| 27422290 | 27781930 | chr2  | 27741944 | 27895030 | Col5a1        |
| 28356998 | 28550249 | chr2  | 28411339 | 28418882 | Cel           |
| 28356998 | 28550249 | chr2  | 28547599 | 28555171 | 1700026L06Rik |
| 28356998 | 28550249 | chr2  | 28352410 | 28360935 | Gbgt1         |
| 28356998 | 28550249 | chr2  | 28368686 | 28408602 | Ralgds        |
| 28356998 | 28550249 | chr2  | 28421782 | 28438799 | Gtf3c5        |
| 28356998 | 28550249 | chr2  | 28464969 | 28477502 | Gfi1b         |
| 28356998 | 28550249 | chr2  | 28496762 | 28546687 | Tsc1          |
| 29793805 | 30271739 | chr2  | 29851469 | 29851540 | Mir6997       |
| 29793805 | 30271739 | chr2  | 29917515 | 29928097 | Set           |
| 29793805 | 30271739 | chr2  | 29934285 | 29946539 | Pkn3          |
| 29793805 | 30271739 | chr2  | 29946463 | 29949155 | Zdhhc12       |
| 29793805 | 30271739 | chr2  | 30027043 | 30029589 | Endog         |
| 29793805 | 30271739 | chr2  | 30092717 | 30093151 | 1700084E18Rik |
| 29793805 | 30271739 | chr2  | 30139748 | 30141874 | Dolk          |
| 29793805 | 30271739 | chr2  | 30247935 | 30256047 | Dolpp1        |

|          |          |      |          |          |               |
|----------|----------|------|----------|----------|---------------|
| 29793805 | 30271739 | chr2 | 29790928 | 29814952 | Gle1          |
| 29793805 | 30271739 | chr2 | 29887077 | 29904399 | Wdr34         |
| 29793805 | 30271739 | chr2 | 29952802 | 29979974 | Zer1          |
| 29793805 | 30271739 | chr2 | 29989390 | 30007533 | Tbc1d13       |
| 29793805 | 30271739 | chr2 | 30028966 | 30033979 | D2Wsu81e      |
| 29793805 | 30271739 | chr2 | 30040650 | 30061219 | Ccbl1         |
| 29793805 | 30271739 | chr2 | 30093288 | 30119310 | Lrrc8a        |
| 29793805 | 30271739 | chr2 | 30121722 | 30137669 | Phyhd1        |
| 29793805 | 30271739 | chr2 | 30200328 | 30214751 | Sh3glb2       |
| 29793805 | 30271739 | chr2 | 30219752 | 30241039 | Fam73b        |
| 29793805 | 30271739 | chr2 | 30255995 | 30271268 | Crat          |
| 29793805 | 30271739 | chr2 | 29821079 | 29886970 | Sptan1        |
| 29793805 | 30271739 | chr2 | 30141952 | 30199782 | Nup188        |
| 29793805 | 30271739 | chr2 | 30271569 | 30303327 | Ppp2r4        |
| 30383254 | 31159697 | chr2 | 30576729 | 30576813 | Mir3089       |
| 30383254 | 31159697 | chr2 | 30678617 | 30683820 | Asb6          |
| 30383254 | 31159697 | chr2 | 30808520 | 30814535 | Tor1b         |
| 30383254 | 31159697 | chr2 | 31006568 | 31007811 | D330023K18Rik |
| 30383254 | 31159697 | chr2 | 30450563 | 30464465 | Cstad         |
| 30383254 | 31159697 | chr2 | 30651082 | 30659184 | 1700001O22Rik |
| 30383254 | 31159697 | chr2 | 30700886 | 30736767 | Prrx2         |
| 30383254 | 31159697 | chr2 | 30744990 | 30758817 | Ptges         |
| 30383254 | 31159697 | chr2 | 30816080 | 30823438 | Tor1a         |
| 30383254 | 31159697 | chr2 | 30828352 | 30837461 | BC005624      |
| 30383254 | 31159697 | chr2 | 30837798 | 30878175 | Usp20         |
| 30383254 | 31159697 | chr2 | 31101442 | 31150991 | Ncs1          |
| 30383254 | 31159697 | chr2 | 30663496 | 30678534 | Ntmt1         |
| 30383254 | 31159697 | chr2 | 30881725 | 30997528 | Fnbp1         |
| 30383254 | 31159697 | chr2 | 31007835 | 31072087 | Gpr107        |
| 31310622 | 31639010 | chr2 | 31467940 | 31468004 | Mir6998       |
| 31310622 | 31639010 | chr2 | 31526256 | 31536827 | Exosc2        |
| 31310622 | 31639010 | chr2 | 31495556 | 31511315 | Prdm12        |
| 31310622 | 31639010 | chr2 | 31325789 | 31376190 | Ass1          |
| 31310622 | 31639010 | chr2 | 31544056 | 31659882 | Abl1          |
| 31310622 | 31639010 | chr2 | 31428244 | 31473039 | Fubp3         |
| 31866666 | 32617981 | chr2 | 31906465 | 31906528 | Mir7674       |
| 31866666 | 32617981 | chr2 | 32134335 | 32143588 | Swi5          |
| 31866666 | 32617981 | chr2 | 32173979 | 32174089 | Mir199b       |
| 31866666 | 32617981 | chr2 | 32234620 | 32237435 | 1110008P14Rik |
| 31866666 | 32617981 | chr2 | 32240156 | 32243259 | Lcn2          |
| 31866666 | 32617981 | chr2 | 32251409 | 32258260 | Ptges2        |
| 31866666 | 32617981 | chr2 | 32426377 | 32429091 | Dpm2          |
| 31866666 | 32617981 | chr2 | 32431338 | 32439299 | Pip5kl1       |
| 31866666 | 32617981 | chr2 | 32442597 | 32455216 | St6galnac4    |
| 31866666 | 32617981 | chr2 | 32543149 | 32543286 | Mir8093       |
| 31866666 | 32617981 | chr2 | 32561301 | 32568304 | Cdk9          |
| 31866666 | 32617981 | chr2 | 32568326 | 32568408 | Mir2861       |

|           |           |      |           |           |               |
|-----------|-----------|------|-----------|-----------|---------------|
| 31866666  | 32617981  | chr2 | 32568419  | 32568492  | Mir3960       |
| 31866666  | 32617981  | chr2 | 32588140  | 32596536  | 6330409D20Rik |
| 31866666  | 32617981  | chr2 | 32612753  | 32617764  | Tor2a         |
| 31866666  | 32617981  | chr2 | 31922404  | 31939225  | Fam78a        |
| 31866666  | 32617981  | chr2 | 31951170  | 31966340  | Ppapdc3       |
| 31866666  | 32617981  | chr2 | 32006667  | 32090057  | Prrc2b        |
| 31866666  | 32617981  | chr2 | 32092202  | 32110525  | Pomt1         |
| 31866666  | 32617981  | chr2 | 32143772  | 32163441  | Golga2        |
| 31866666  | 32617981  | chr2 | 32163990  | 32208824  | Dnm1          |
| 31866666  | 32617981  | chr2 | 32218529  | 32233833  | Ciz1          |
| 31866666  | 32617981  | chr2 | 32270006  | 32306990  | Slc25a25      |
| 31866666  | 32617981  | chr2 | 32305976  | 32310996  | Naif1         |
| 31866666  | 32617981  | chr2 | 32390878  | 32425270  | Fam102a       |
| 31866666  | 32617981  | chr2 | 32455228  | 32476324  | St6galnac6    |
| 31866666  | 32617981  | chr2 | 32477277  | 32490578  | Ak1           |
| 31866666  | 32617981  | chr2 | 32538128  | 32549695  | Fpgs          |
| 31866666  | 32617981  | chr2 | 32576574  | 32610527  | Sh2d3c        |
| 31866666  | 32617981  | chr2 | 32617696  | 32630903  | Ttc16         |
| 31866666  | 32617981  | chr2 | 31829969  | 31909495  | Nup214        |
| 31866666  | 32617981  | chr2 | 32110521  | 32115625  | Uck1          |
| 31866666  | 32617981  | chr2 | 32502114  | 32538189  | Eng           |
| 72710619  | 72934540  | chr2 | 72774489  | 72818503  | Sp3           |
| 72710619  | 72934540  | chr2 | 72817488  | 72827306  | Sp3os         |
| 72710619  | 72934540  | chr2 | 72930857  | 73052504  | Ola1          |
| 77681244  | 77890200  | chr2 | 77733709  | 77784410  | Cwc22         |
| 77681244  | 77890200  | chr2 | 77889233  | 78034587  | 4930440I19Rik |
| 118202687 | 118700427 | chr2 | 118301578 | 118305432 | Srp14         |
| 118202687 | 118700427 | chr2 | 118524838 | 118529699 | Ankrd63       |
| 118202687 | 118700427 | chr2 | 118571497 | 118574543 | 5430417L22Rik |
| 118202687 | 118700427 | chr2 | 118423946 | 118467328 | Bub1b         |
| 118202687 | 118700427 | chr2 | 118489312 | 118523756 | Pak6          |
| 118202687 | 118700427 | chr2 | 118533252 | 118554174 | Plcb2         |
| 118202687 | 118700427 | chr2 | 118579880 | 118588397 | A430105I19Rik |
| 118202687 | 118700427 | chr2 | 118598504 | 118603900 | Phgr1         |
| 118202687 | 118700427 | chr2 | 118639738 | 118661948 | Knstrn        |
| 118202687 | 118700427 | chr2 | 118687735 | 118707093 | Ivd           |
| 118202687 | 118700427 | chr2 | 118214352 | 118300970 | Eif2ak4       |
| 118202687 | 118700427 | chr2 | 118354492 | 118375414 | Bmf           |
| 118202687 | 118700427 | chr2 | 118605454 | 118620911 | Disp2         |
| 118779583 | 119486368 | chr2 | 119000244 | 119003311 | Gm14137       |
| 118779583 | 119486368 | chr2 | 119034455 | 119042786 | Zfyve19       |
| 118779583 | 119486368 | chr2 | 119063095 | 119075249 | Spint1        |
| 118779583 | 119486368 | chr2 | 119114477 | 119124189 | Vps18         |
| 118779583 | 119486368 | chr2 | 119146934 | 119151933 | Gm14207       |
| 118779583 | 119486368 | chr2 | 118843514 | 118855129 | Ccdc32        |
| 118779583 | 119486368 | chr2 | 118860525 | 118867933 | Rpusd2        |
| 118779583 | 119486368 | chr2 | 118938552 | 118961806 | Rad51         |



|           |           |      |           |           |               |
|-----------|-----------|------|-----------|-----------|---------------|
| 118779583 | 119486368 | chr2 | 118962733 | 118982770 | Rmdn3         |
| 118779583 | 119486368 | chr2 | 118993523 | 118998125 | Gchfr         |
| 118779583 | 119486368 | chr2 | 119043858 | 119055601 | Ppp1r14d      |
| 118779583 | 119486368 | chr2 | 119094936 | 119096962 | Rhov          |
| 118779583 | 119486368 | chr2 | 119151519 | 119161402 | Dll4          |
| 118779583 | 119486368 | chr2 | 119176977 | 119180062 | Chac1         |
| 118779583 | 119486368 | chr2 | 119345139 | 119373363 | Exd1          |
| 118779583 | 119486368 | chr2 | 119420031 | 119426480 | 1700020i14Rik |
| 118779583 | 119486368 | chr2 | 119435267 | 119444241 | Oip5          |
| 118779583 | 119486368 | chr2 | 119444033 | 119475896 | Nusap1        |
| 118779583 | 119486368 | chr2 | 119481186 | 119488534 | Ndufaf1       |
| 118779583 | 119486368 | chr2 | 118872854 | 118929857 | Casc5         |
| 118779583 | 119486368 | chr2 | 118998235 | 119034531 | Dnajc17       |
| 118779583 | 119486368 | chr2 | 119198778 | 119303365 | Ino80         |
| 118779583 | 119486368 | chr2 | 119373442 | 119412758 | Chp1          |
| 127868849 | 128591483 | chr2 | 127951773 | 127988283 | Bcl2l11       |
| 127868849 | 128591483 | chr2 | 128124398 | 128255087 | Gm14005       |
| 127868849 | 128591483 | chr2 | 128435818 | 128513131 | Anapc1        |
| 127868849 | 128591483 | chr2 | 128524732 | 128627924 | Mertk         |
| 127868849 | 128591483 | chr2 | 127680363 | 127949628 | Acox1         |
| 128834984 | 129008961 | chr2 | 129003883 | 129006409 | Al847159      |
| 128834984 | 129008961 | chr2 | 128891682 | 128922019 | Ttl           |
| 128834984 | 129008961 | chr2 | 128926731 | 128952331 | Polr1b        |
| 128834984 | 129008961 | chr2 | 128955435 | 128959847 | Chchd5        |
| 128834984 | 129008961 | chr2 | 128793137 | 128844299 | Zc3h6         |
| 130428675 | 130757087 | chr2 | 130439573 | 130455763 | Fastkd5       |
| 130428675 | 130757087 | chr2 | 130458574 | 130468539 | Lzts3         |
| 130428675 | 130757087 | chr2 | 130479818 | 130490381 | Ddrngk1       |
| 130428675 | 130757087 | chr2 | 130493576 | 130507350 | Itpa          |
| 130428675 | 130757087 | chr2 | 130509843 | 130523255 | Slc4a11       |
| 130428675 | 130757087 | chr2 | 130627701 | 130629837 | Gm14057       |
| 130428675 | 130757087 | chr2 | 130698276 | 130732132 | A730017L22Rik |
| 130428675 | 130757087 | chr2 | 130415731 | 130455774 | Ubox5         |
| 130428675 | 130757087 | chr2 | 130533588 | 130665846 | 4930402H24Rik |
| 130428675 | 130757087 | chr2 | 130732231 | 130856062 | Atrn          |
| 131129915 | 131245391 | chr2 | 131124223 | 131178628 | Rnf24         |
| 152486398 | 152804275 | chr2 | 152512883 | 152513678 | Mcts2         |
| 152486398 | 152804275 | chr2 | 152561986 | 152563146 | Id1           |
| 152486398 | 152804275 | chr2 | 152690802 | 152690862 | Mir5622       |
| 152486398 | 152804275 | chr2 | 152757633 | 152758944 | Foxs1         |
| 152486398 | 152804275 | chr2 | 152766730 | 152777318 | Dusp15        |
| 152486398 | 152804275 | chr2 | 152495196 | 152534404 | H13           |
| 152486398 | 152804275 | chr2 | 152579908 | 152590773 | Cox4i2        |
| 152486398 | 152804275 | chr2 | 152606403 | 152657418 | Bcl2l1        |
| 152486398 | 152804275 | chr2 | 152737087 | 152748801 | Mylk2         |
| 152486398 | 152804275 | chr2 | 152673699 | 152721057 | Tpx2          |
| 152486398 | 152804275 | chr2 | 152788220 | 152834218 | Ttll9         |

|           |           |      |           |           |               |
|-----------|-----------|------|-----------|-----------|---------------|
| 154224728 | 154392336 | chr2 | 154370140 | 154384589 | Necab3        |
| 154224728 | 154392336 | chr2 | 154374639 | 154375784 | 1700003F12Rik |
| 154224728 | 154392336 | chr2 | 154377511 | 154379012 | Actl10        |
| 154224728 | 154392336 | chr2 | 154202049 | 154233820 | Snta1         |
| 154224728 | 154392336 | chr2 | 154385374 | 154395588 | E2f1          |
| 154224728 | 154392336 | chr2 | 154262219 | 154365092 | Cbfa2t2       |
| 157835105 | 158176902 | chr2 | 158017743 | 158021470 | 1700060C20Rik |
| 157835105 | 158176902 | chr2 | 158069239 | 158069301 | Mir7685       |
| 157835105 | 158176902 | chr2 | 157854529 | 157903056 | Rprd1b        |
| 157835105 | 158176902 | chr2 | 157896099 | 157917533 | 2010009K17Rik |
| 157835105 | 158176902 | chr2 | 157942140 | 157972128 | Tgm2          |
| 157835105 | 158176902 | chr2 | 158008268 | 158054960 | D630003M21Rik |
| 157835105 | 158176902 | chr2 | 158021483 | 158054960 | D630003M21Rik |
| 157835105 | 158176902 | chr2 | 158083976 | 158110267 | Bpi           |
| 157835105 | 158176902 | chr2 | 158132228 | 158158588 | Lbp           |
| 165507047 | 166472906 | chr2 | 165818136 | 165898742 | Ncoa3         |
| 165507047 | 166472906 | chr2 | 166099407 | 166120331 | Gm11468       |
| 165507047 | 166472906 | chr2 | 166272950 | 166284270 | 5031425F14Rik |
| 165507047 | 166472906 | chr2 | 165420527 | 165597227 | Eya2          |
| 165507047 | 166472906 | chr2 | 165899398 | 165981183 | Sulf2         |
| 165507047 | 166472906 | chr2 | 166391844 | 166539332 | Prex1         |
| 165507047 | 166472906 | chr2 | 165609651 | 165710338 | Zmynd8        |
| 167047927 | 167738418 | chr2 | 167363726 | 167368311 | Snai1         |
| 167047927 | 167738418 | chr2 | 167514414 | 167515932 | Cebpb         |
| 167047927 | 167738418 | chr2 | 167516707 | 167522913 | A530013C23Rik |
| 167047927 | 167738418 | chr2 | 167028695 | 167066037 | Ptgis         |
| 167047927 | 167738418 | chr2 | 167123944 | 167174678 | B4galt5       |
| 167047927 | 167738418 | chr2 | 167306635 | 167318374 | Spata2        |
| 167047927 | 167738418 | chr2 | 167318144 | 167341666 | Rnf114        |
| 167047927 | 167738418 | chr2 | 167433138 | 167457505 | Ube2v1        |
| 167047927 | 167738418 | chr2 | 167468724 | 167487044 | Tmem189       |
| 167047927 | 167738418 | chr2 | 167247220 | 167302498 | Slc9a8        |
| 181037644 | 181383538 | chr2 | 181092394 | 181100109 | Arfrp1        |
| 181037644 | 181383538 | chr2 | 181115939 | 181118333 | Lime1         |
| 181037644 | 181383538 | chr2 | 181118954 | 181122301 | Slc2a4rg-ps   |
| 181037644 | 181383538 | chr2 | 181227910 | 181229685 | Abhd16b       |
| 181037644 | 181383538 | chr2 | 181313184 | 181319820 | Gm16119       |
| 181037644 | 181383538 | chr2 | 181322604 | 181322673 | Mir7006       |
| 181037644 | 181383538 | chr2 | 181329923 | 181333852 | Samd10        |
| 181037644 | 181383538 | chr2 | 181041163 | 181049205 | Stmn3         |
| 181037644 | 181383538 | chr2 | 181054428 | 181091321 | Rtel1         |
| 181037644 | 181383538 | chr2 | 181099635 | 181115498 | Zgpat         |
| 181037644 | 181383538 | chr2 | 181231957 | 181251462 | Tpd52l2       |
| 181037644 | 181383538 | chr2 | 181303858 | 181316678 | Uckl1         |
| 181037644 | 181383538 | chr2 | 181316807 | 181327166 | Znf512b       |
| 181037644 | 181383538 | chr2 | 181336023 | 181390366 | Prpf6         |
| 181037644 | 181383538 | chr2 | 181125590 | 181194131 | Zbtb46        |

|           |           |      |           |           |               |
|-----------|-----------|------|-----------|-----------|---------------|
| 181037644 | 181383538 | chr2 | 181255189 | 181287585 | Dnajc5        |
| 87821690  | 88476607  | chr3 | 87825671  | 87831433  | Hapln2        |
| 87821690  | 88476607  | chr3 | 87860444  | 87862417  | Apoa1bp       |
| 87821690  | 88476607  | chr3 | 87873331  | 87882226  | Ttc24         |
| 87821690  | 88476607  | chr3 | 87975481  | 87981707  | 1700113A16Rik |
| 87821690  | 88476607  | chr3 | 88019092  | 88019179  | Mir3093       |
| 87821690  | 88476607  | chr3 | 88019519  | 88019608  | Mir9-1        |
| 87821690  | 88476607  | chr3 | 88132574  | 88138355  | Tmem79        |
| 87821690  | 88476607  | chr3 | 88168510  | 88172463  | Paqr6         |
| 87821690  | 88476607  | chr3 | 88172538  | 88173642  | Bglap3        |
| 87821690  | 88476607  | chr3 | 88181657  | 88182621  | Bglap2        |
| 87821690  | 88476607  | chr3 | 88187416  | 88188388  | Bglap         |
| 87821690  | 88476607  | chr3 | 88244800  | 88244873  | Mir7011       |
| 87821690  | 88476607  | chr3 | 88340222  | 88340304  | Mir1905       |
| 87821690  | 88476607  | chr3 | 88345950  | 88352201  | Rab25         |
| 87821690  | 88476607  | chr3 | 88353740  | 88356849  | Lamtor2       |
| 87821690  | 88476607  | chr3 | 88455819  | 88457064  | Rxfp4         |
| 87821690  | 88476607  | chr3 | 87847027  | 87859916  | Gpatch4       |
| 87821690  | 88476607  | chr3 | 87885972  | 87924970  | lqgap3        |
| 87821690  | 88476607  | chr3 | 88046795  | 88058606  | Rhbg          |
| 87821690  | 88476607  | chr3 | 88086681  | 88100760  | Tsacc         |
| 87821690  | 88476607  | chr3 | 88101056  | 88125688  | Cct3          |
| 87821690  | 88476607  | chr3 | 88128944  | 88132553  | 0610031J06Rik |
| 87821690  | 88476607  | chr3 | 88140181  | 88166259  | Smg5          |
| 87821690  | 88476607  | chr3 | 88214415  | 88229063  | Slc25a44      |
| 87821690  | 88476607  | chr3 | 88239883  | 88265104  | Sema4a        |
| 87821690  | 88476607  | chr3 | 88285069  | 88307274  | Lmna          |
| 87821690  | 88476607  | chr3 | 88357637  | 88373647  | Ubqln4        |
| 87821690  | 88476607  | chr3 | 88383592  | 88392335  | Ssr2          |
| 87821690  | 88476607  | chr3 | 88420128  | 88451974  | Arhgef2       |
| 87821690  | 88476607  | chr3 | 87946316  | 87973089  | Mef2d         |
| 87821690  | 88476607  | chr3 | 88198064  | 88214238  | Pmf1          |
| 87821690  | 88476607  | chr3 | 88336316  | 88345316  | Mex3a         |
| 102803580 | 102957620 | chr3 | 102799662 | 102807837 | Sike1         |
| 102803580 | 102957620 | chr3 | 102862207 | 102871837 | Nras          |
| 102803580 | 102957620 | chr3 | 102824468 | 102862112 | Csde1         |
| 102803580 | 102957620 | chr3 | 102931478 | 102973656 | Dennd2c       |
| 102803580 | 102957620 | chr3 | 102877936 | 102903643 | Ampd1         |
| 121088905 | 121519059 | chr3 | 121373680 | 121385900 | 4930432M17Rik |
| 121088905 | 121519059 | chr3 | 121426454 | 121437970 | F3            |
| 121088905 | 121519059 | chr3 | 121129458 | 121161123 | Cnn3          |
| 121088905 | 121519059 | chr3 | 121162445 | 121235262 | Slc44a3       |
| 121088905 | 121519059 | chr3 | 121337855 | 121349371 | A730020M07Rik |
| 121088905 | 121519059 | chr3 | 121461827 | 121518133 | Abcd3         |
| 145266007 | 145873262 | chr3 | 145309934 | 145312949 | Cyr61         |
| 145266007 | 145873262 | chr3 | 145239171 | 145268209 | Znhit6        |
| 145266007 | 145873262 | chr3 | 145587225 | 145597328 | Bcl10         |

|           |           |      |           |           |               |
|-----------|-----------|------|-----------|-----------|---------------|
| 145266007 | 145873262 | chr3 | 145600995 | 145607239 | 2410004B18Rik |
| 145266007 | 145873262 | chr3 | 145650833 | 145684684 | Syde2         |
| 145266007 | 145873262 | chr3 | 145784754 | 145803610 | Mcoln3        |
| 145266007 | 145873262 | chr3 | 145812796 | 145858476 | Mcoln2        |
| 145266007 | 145873262 | chr3 | 145421655 | 145557241 | Ddah1         |
| 145266007 | 145873262 | chr3 | 145703489 | 145771000 | Wdr63         |
| 151387615 | 151828156 | chr3 | 151421700 | 151425855 | Ifi44l        |
| 151387615 | 151828156 | chr3 | 151393886 | 151412923 | Ifi44         |
| 151387615 | 151828156 | chr3 | 151461573 | 151500492 | Ptgr          |
| 151387615 | 151828156 | chr3 | 151756804 | 151828864 | Gipc2         |
| 116297017 | 116450681 | chr4 | 116357569 | 116358627 | AV051173      |
| 116297017 | 116450681 | chr4 | 116381534 | 116387709 | Ccdc163       |
| 116297017 | 116450681 | chr4 | 116273656 | 116300556 | Nasp          |
| 116297017 | 116450681 | chr4 | 116309114 | 116324279 | Akr1a1        |
| 116297017 | 116450681 | chr4 | 116358203 | 116372605 | Prdx1         |
| 116297017 | 116450681 | chr4 | 116375038 | 116380990 | Mmachc        |
| 116297017 | 116450681 | chr4 | 116393559 | 116476853 | Tesk2         |
| 128602840 | 128720778 | chr4 | 128609389 | 128639661 | Adc           |
| 128602840 | 128720778 | chr4 | 128670467 | 128688773 | Ak2           |
| 132462178 | 132848884 | chr4 | 132751569 | 132751631 | Mir7017       |
| 132462178 | 132848884 | chr4 | 132765254 | 132768451 | Gpr3          |
| 132462178 | 132848884 | chr4 | 132776723 | 132780469 | Cd164l2       |
| 132462178 | 132848884 | chr4 | 132809004 | 132819002 | Sytl1         |
| 132462178 | 132848884 | chr4 | 132455127 | 132478466 | Fam76a        |
| 132462178 | 132848884 | chr4 | 132530009 | 132557797 | Fgr           |
| 132462178 | 132848884 | chr4 | 132567420 | 132634025 | Ahdc1         |
| 132462178 | 132848884 | chr4 | 132686547 | 132754245 | Wasf2         |
| 132462178 | 132848884 | chr4 | 132796732 | 132808843 | Map3k6        |
| 132462178 | 132848884 | chr4 | 132821959 | 132833705 | Tmem222       |
| 132462178 | 132848884 | chr4 | 132848380 | 132895230 | Wdtdc1        |
| 150018012 | 150287083 | chr4 | 150003504 | 150026283 | Slc45a1       |
| 150018012 | 150287083 | chr4 | 150229199 | 150242989 | Errf1         |
| 150018012 | 150287083 | chr4 | 150271241 | 150284030 | Park7         |
| 150018012 | 150287083 | chr4 | 150202333 | 150229058 | 1700045H11Rik |
| 24172081  | 24422789  | chr5 | 24256819  | 24263661  | Crygn         |
| 24172081  | 24422789  | chr5 | 24191632  | 24216373  | Nub1          |
| 24172081  | 24422789  | chr5 | 24218086  | 24236498  | Wdr86         |
| 24172081  | 24422789  | chr5 | 24308640  | 24348179  | Rheb          |
| 24172081  | 24422789  | chr5 | 24408386  | 24412667  | Prkag2os1     |
| 24172081  | 24422789  | chr5 | 24368552  | 24606460  | Prkag2        |
| 31749403  | 32673581  | chr5 | 31788231  | 31790635  | 4930548H24Rik |
| 31749403  | 32673581  | chr5 | 31871964  | 31873770  | Al839979      |
| 31749403  | 32673581  | chr5 | 31916323  | 31925017  | Mrpl33        |
| 31749403  | 32673581  | chr5 | 31969603  | 31969713  | Mir3473e      |
| 31749403  | 32673581  | chr5 | 31754808  | 31784126  | Zfp512        |
| 31749403  | 32673581  | chr5 | 31797133  | 31814000  | Gpn1          |
| 31749403  | 32673581  | chr5 | 31816941  | 31829135  | Supt7l        |

|           |           |      |           |           |               |
|-----------|-----------|------|-----------|-----------|---------------|
| 31749403  | 32673581  | chr5 | 32438844  | 32460212  | Fosl2         |
| 31749403  | 32673581  | chr5 | 31829367  | 31856411  | Slc4a1ap      |
| 31749403  | 32673581  | chr5 | 31926811  | 31999983  | Rbks          |
| 31749403  | 32673581  | chr5 | 32000422  | 32387112  | Bre           |
| 31749403  | 32673581  | chr5 | 32535080  | 32666729  | Plb1          |
| 33505245  | 33788043  | chr5 | 33556166  | 33560887  | Spon2         |
| 33505245  | 33788043  | chr5 | 33446867  | 33505348  | Slc5a1        |
| 33505245  | 33788043  | chr5 | 33590371  | 33617653  | Ctbp1         |
| 33505245  | 33788043  | chr5 | 33721344  | 33762403  | Uvssa         |
| 33505245  | 33788043  | chr5 | 33678220  | 33715943  | Maea          |
| 33979649  | 34271318  | chr5 | 33982710  | 33994955  | Slbp          |
| 33979649  | 34271318  | chr5 | 34241558  | 34241620  | Mir7024       |
| 33979649  | 34271318  | chr5 | 33995864  | 34000481  | Tmem129       |
| 33979649  | 34271318  | chr5 | 34000795  | 34014846  | Tacc3         |
| 33979649  | 34271318  | chr5 | 34084000  | 34125353  | Letm1         |
| 33979649  | 34271318  | chr5 | 34240828  | 34278907  | Nelfa         |
| 33979649  | 34271318  | chr5 | 34064372  | 34079717  | Fgfr3         |
| 33979649  | 34271318  | chr5 | 34185760  | 34240615  | Whsc1         |
| 35896362  | 36090643  | chr5 | 35923875  | 35931412  | 4931431C16Rik |
| 35896362  | 36090643  | chr5 | 35925708  | 35956450  | Acox3         |
| 35896362  | 36090643  | chr5 | 35994674  | 36022429  | Htra3         |
| 35896362  | 36090643  | chr5 | 35898857  | 35917719  | Trmt44        |
| 35896362  | 36090643  | chr5 | 36039828  | 36071925  | Sh3tc1        |
| 74600138  | 74795711  | chr5 | 74600840  | 74927767  | Scfd2         |
| 110852296 | 111149598 | chr5 | 110858893 | 110860974 | LOC101056043  |
| 110852296 | 111149598 | chr5 | 111077437 | 111082401 | Noc4l         |
| 110852296 | 111149598 | chr5 | 111095093 | 111095160 | Mir7026       |
| 110852296 | 111149598 | chr5 | 110790770 | 110877522 | Fbrsl1        |
| 110852296 | 111149598 | chr5 | 110943941 | 110954998 | A630023P12Rik |
| 110852296 | 111149598 | chr5 | 111082469 | 111089515 | Ddx51         |
| 110852296 | 111149598 | chr5 | 110973373 | 111050402 | Galnt9        |
| 110852296 | 111149598 | chr5 | 111093391 | 111199736 | Ep400         |
| 111871114 | 112335756 | chr5 | 112010580 | 112016173 | C130026L21Rik |
| 111871114 | 112335756 | chr5 | 111847185 | 111886045 | Mn1           |
| 111871114 | 112335756 | chr5 | 112163303 | 112190748 | E130006D01Rik |
| 114758473 | 114859116 | chr5 | 114854476 | 114854548 | Mir7027       |
| 114758473 | 114859116 | chr5 | 114764949 | 114814585 | Myo1h         |
| 114758473 | 114859116 | chr5 | 114830615 | 114871175 | Ube3b         |
| 114758473 | 114859116 | chr5 | 114813580 | 114830514 | Kctd10        |
| 115903654 | 116142828 | chr5 | 116009475 | 116013738 | Rplp0         |
| 115903654 | 116142828 | chr5 | 116030957 | 116031018 | Mir7029       |
| 115903654 | 116142828 | chr5 | 116081057 | 116081825 | 1110006O24Rik |
| 115903654 | 116142828 | chr5 | 116095581 | 116095641 | Mir7030       |
| 115903654 | 116142828 | chr5 | 115879693 | 115904211 | Msi1          |
| 115903654 | 116142828 | chr5 | 115916274 | 115924726 | Pla2g1b       |
| 115903654 | 116142828 | chr5 | 115928018 | 115934493 | Sirt4         |
| 115903654 | 116142828 | chr5 | 116015271 | 116072663 | Gcn11         |

|           |           |      |           |           |               |
|-----------|-----------|------|-----------|-----------|---------------|
| 115903654 | 116142828 | chr5 | 116081995 | 116097167 | Rab35         |
| 115903654 | 116142828 | chr5 | 115956684 | 116005996 | Pxn           |
| 115903654 | 116142828 | chr5 | 116099294 | 116181568 | Ccdc64        |
| 121616436 | 122303596 | chr5 | 121654509 | 121659250 | Rpl6          |
| 121616436 | 122303596 | chr5 | 121950105 | 121952989 | Adam1b        |
| 121616436 | 122303596 | chr5 | 121968612 | 121971704 | Adam1a        |
| 121616436 | 122303596 | chr5 | 122269217 | 122269282 | Mir7031       |
| 121616436 | 122303596 | chr5 | 122299036 | 122304608 | Fam109a       |
| 121616436 | 122303596 | chr5 | 121821733 | 121835624 | Trafd1        |
| 121616436 | 122303596 | chr5 | 121847990 | 121890122 | Naa25         |
| 121616436 | 122303596 | chr5 | 121902717 | 121945430 | Tmem116       |
| 121616436 | 122303596 | chr5 | 121975059 | 121995901 | Mapkapk5      |
| 121616436 | 122303596 | chr5 | 122048289 | 122068947 | Acad12        |
| 121616436 | 122303596 | chr5 | 122071037 | 122110519 | Acad10        |
| 121616436 | 122303596 | chr5 | 122110594 | 122137256 | Brap          |
| 121616436 | 122303596 | chr5 | 122161617 | 122264959 | Atxn2         |
| 121616436 | 122303596 | chr5 | 122267223 | 122286810 | Sh2b3         |
| 121616436 | 122303596 | chr5 | 121670227 | 121818586 | Gm15800       |
| 121616436 | 122303596 | chr5 | 121894761 | 121902483 | Erp29         |
| 121616436 | 122303596 | chr5 | 122017695 | 122043833 | Aldh2         |
| 121616436 | 122303596 | chr5 | 121580541 | 121641406 | Ptpn11        |
| 122496845 | 123943686 | chr5 | 122804421 | 122813296 | Vps29         |
| 122496845 | 123943686 | chr5 | 122814592 | 122821972 | Fam216a       |
| 122496845 | 123943686 | chr5 | 123439362 | 123448350 | A930024E05Rik |
| 122496845 | 123943686 | chr5 | 123487135 | 123496829 | Morn3         |
| 122496845 | 123943686 | chr5 | 123568188 | 123582638 | Rhof          |
| 122496845 | 123943686 | chr5 | 123621815 | 123632695 | Hpd           |
| 122496845 | 123943686 | chr5 | 123930161 | 123932110 | Il31          |
| 122496845 | 123943686 | chr5 | 122558064 | 122588071 | Ccdc63        |
| 122496845 | 123943686 | chr5 | 122608287 | 122625278 | Ppp1cc        |
| 122496845 | 123943686 | chr5 | 122691523 | 122714469 | Tctn1         |
| 122496845 | 123943686 | chr5 | 122734406 | 122774290 | Pptc7         |
| 122496845 | 123943686 | chr5 | 122775516 | 122804204 | Rad9b         |
| 122496845 | 123943686 | chr5 | 122822516 | 122832778 | Gpn3          |
| 122496845 | 123943686 | chr5 | 122841936 | 122856187 | Arpc3         |
| 122496845 | 123943686 | chr5 | 122872452 | 122894920 | Anapc7        |
| 122496845 | 123943686 | chr5 | 123000212 | 123064527 | Ift81         |
| 122496845 | 123943686 | chr5 | 123093919 | 123141441 | P2rx7         |
| 122496845 | 123943686 | chr5 | 123157565 | 123179051 | P2rx4         |
| 122496845 | 123943686 | chr5 | 123237469 | 123271348 | Anapc5        |
| 122496845 | 123943686 | chr5 | 123300196 | 123318954 | Rnf34         |
| 122496845 | 123943686 | chr5 | 123526283 | 123567454 | Tmem120b      |
| 122496845 | 123943686 | chr5 | 123678198 | 123700134 | Psmc9         |
| 122496845 | 123943686 | chr5 | 123794456 | 123824092 | Bcl7a         |
| 122496845 | 123943686 | chr5 | 123939333 | 123958213 | Lrrc43        |
| 122496845 | 123943686 | chr5 | 122310224 | 122497834 | Cux2          |
| 122496845 | 123943686 | chr5 | 122550988 | 122556863 | Myl2          |

|           |           |      |           |           |            |
|-----------|-----------|------|-----------|-----------|------------|
| 122496845 | 123943686 | chr5 | 122903521 | 122952234 | Atp2a2     |
| 122496845 | 123943686 | chr5 | 123181179 | 123229419 | Camkk2     |
| 122496845 | 123943686 | chr5 | 123320684 | 123439101 | Kdm2b      |
| 122496845 | 123943686 | chr5 | 123465082 | 123480461 | Orai1      |
| 122496845 | 123943686 | chr5 | 123592201 | 123618639 | Setd1b     |
| 122496845 | 123943686 | chr5 | 123844806 | 123907940 | Mlxip      |
| 122496845 | 123943686 | chr5 | 122659737 | 122692306 | Hvcn1      |
| 124314110 | 124685634 | chr5 | 124313578 | 124315525 | Niacr1     |
| 124314110 | 124685634 | chr5 | 124326744 | 124330029 | Gpr81      |
| 124314110 | 124685634 | chr5 | 124446860 | 124446939 | Mir7032    |
| 124314110 | 124685634 | chr5 | 124562346 | 124565485 | Ogfod2     |
| 124314110 | 124685634 | chr5 | 124357283 | 124378841 | Denr       |
| 124314110 | 124685634 | chr5 | 124423636 | 124453224 | Hip1r      |
| 124314110 | 124685634 | chr5 | 124454649 | 124482269 | Vps37b     |
| 124314110 | 124685634 | chr5 | 124566116 | 124568204 | Arl6ip4    |
| 124314110 | 124685634 | chr5 | 124679733 | 124687146 | Pitpnm2os1 |
| 124314110 | 124685634 | chr5 | 124380697 | 124419904 | Ccdc62     |
| 124314110 | 124685634 | chr5 | 124511865 | 124545807 | Abcb9      |
| 124314110 | 124685634 | chr5 | 124568698 | 124666427 | Pitpnm2    |
| 124806308 | 125089733 | chr5 | 124933163 | 124941131 | Snrnp35    |
| 124806308 | 125089733 | chr5 | 124818710 | 124875923 | Sbno1      |
| 124806308 | 125089733 | chr5 | 124913273 | 124928244 | Rilpl2     |
| 124806308 | 125089733 | chr5 | 124943088 | 124981400 | Rilpl1     |
| 124806308 | 125089733 | chr5 | 124990799 | 125000512 | Tmed2      |
| 124806308 | 125089733 | chr5 | 125002872 | 125019669 | Ddx55      |
| 124806308 | 125089733 | chr5 | 125020222 | 125029066 | Eif2b1     |
| 124806308 | 125089733 | chr5 | 125048757 | 125077658 | Tctn2      |
| 124806308 | 125089733 | chr5 | 124889938 | 124912316 | Setd8      |
| 124806308 | 125089733 | chr5 | 125029156 | 125047689 | Gtf2h3     |
| 124806308 | 125089733 | chr5 | 125079632 | 125204825 | Atp6v0a2   |
| 135763012 | 137098567 | chr5 | 135845822 | 135852667 | Nsun5      |
| 135763012 | 137098567 | chr5 | 135859599 | 135859680 | Mir7033    |
| 135763012 | 137098567 | chr5 | 136045806 | 136048913 | Ccl24      |
| 135763012 | 137098567 | chr5 | 136211675 | 136211759 | Mir7034    |
| 135763012 | 137098567 | chr5 | 136514365 | 136520863 | Upk3b      |
| 135763012 | 137098567 | chr5 | 136533136 | 136540194 | Upk3bl     |
| 135763012 | 137098567 | chr5 | 136581391 | 136581473 | Mir7035    |
| 135763012 | 137098567 | chr5 | 136614650 | 136617484 | Alkbh4     |
| 135763012 | 137098567 | chr5 | 136851585 | 136851673 | Mir721     |
| 135763012 | 137098567 | chr5 | 135829165 | 135843524 | Trim50     |
| 135763012 | 137098567 | chr5 | 135852009 | 135870416 | Pom121     |
| 135763012 | 137098567 | chr5 | 136036317 | 136039439 | Ccl26      |
| 135763012 | 137098567 | chr5 | 136108523 | 136122246 | Rhbdd2     |
| 135763012 | 137098567 | chr5 | 136211359 | 136220042 | Tmem120a   |
| 135763012 | 137098567 | chr5 | 136223089 | 136254255 | Styxl1     |
| 135763012 | 137098567 | chr5 | 136254518 | 136266256 | Mdh2       |
| 135763012 | 137098567 | chr5 | 136363788 | 136365433 | Hspb1      |

|           |           |      |           |           |               |
|-----------|-----------|------|-----------|-----------|---------------|
| 135763012 | 137098567 | chr5 | 136384248 | 136410511 | Ywhag         |
| 135763012 | 137098567 | chr5 | 136455974 | 136464494 | Zp3           |
| 135763012 | 137098567 | chr5 | 136470669 | 136508751 | Dtx2          |
| 135763012 | 137098567 | chr5 | 136592560 | 136598817 | Polr2j        |
| 135763012 | 137098567 | chr5 | 136598935 | 136611944 | Lrwd1         |
| 135763012 | 137098567 | chr5 | 136623331 | 136646526 | Orai2         |
| 135763012 | 137098567 | chr5 | 136656226 | 136674824 | Prkrip1       |
| 135763012 | 137098567 | chr5 | 135767573 | 135825914 | Fkbp6         |
| 135763012 | 137098567 | chr5 | 135882387 | 136020992 | Hip1          |
| 135763012 | 137098567 | chr5 | 136165083 | 136211195 | Por           |
| 135763012 | 137098567 | chr5 | 136436092 | 136450346 | Srcrb4d       |
| 135763012 | 137098567 | chr5 | 136559785 | 136587731 | Rasa4         |
| 135763012 | 137098567 | chr5 | 136694018 | 136720773 | Sh2b2         |
| 135763012 | 137098567 | chr5 | 136724004 | 137043301 | Cux1          |
| 135763012 | 137098567 | chr5 | 136293975 | 136350642 | Srrm3         |
| 137260968 | 137617189 | chr5 | 137384019 | 137389114 | Rabl5         |
| 137260968 | 137617189 | chr5 | 137429144 | 137442104 | Fis1          |
| 137260968 | 137617189 | chr5 | 137462888 | 137472516 | Plod3         |
| 137260968 | 137617189 | chr5 | 137467302 | 137467411 | Mir702        |
| 137260968 | 137617189 | chr5 | 137506164 | 137509221 | Vgf           |
| 137260968 | 137617189 | chr5 | 137587155 | 137592077 | Trim56        |
| 137260968 | 137617189 | chr5 | 137395015 | 137412979 | 4933404O12Rik |
| 137260968 | 137617189 | chr5 | 137443738 | 137451715 | Cldn15        |
| 137260968 | 137617189 | chr5 | 137458070 | 137463752 | Znhit1        |
| 137260968 | 137617189 | chr5 | 137510863 | 137521930 | Ap1s1         |
| 137260968 | 137617189 | chr5 | 137537375 | 137548142 | Serpine1      |
| 137260968 | 137617189 | chr5 | 137217633 | 137358977 | Col26a1       |
| 139174222 | 139596532 | chr5 | 139231034 | 139286017 | Fam20c        |
| 139174222 | 139596532 | chr5 | 139296033 | 139297573 | Gm5294        |
| 139174222 | 139596532 | chr5 | 139493257 | 139606340 | Prkar1b       |
| 139174222 | 139596532 | chr5 | 139452928 | 139470907 | Pdgfa         |
| 139783547 | 139986582 | chr5 | 139828570 | 139832987 | Cyp2w1        |
| 139783547 | 139986582 | chr5 | 139845603 | 139845699 | Mir339        |
| 139783547 | 139986582 | chr5 | 139747829 | 139801418 | Adap1         |
| 139783547 | 139986582 | chr5 | 139813775 | 139821120 | Cox19         |
| 139783547 | 139986582 | chr5 | 139856620 | 139872368 | Gpr146        |
| 139783547 | 139986582 | chr5 | 139882340 | 139892046 | C130050O18Rik |
| 139783547 | 139986582 | chr5 | 139899132 | 139903754 | Gper1         |
| 139783547 | 139986582 | chr5 | 139947169 | 139960445 | Zfand2a       |
| 139783547 | 139986582 | chr5 | 139835692 | 139936488 | 3110082I17Rik |
| 139783547 | 139986582 | chr5 | 139853650 | 139856007 | D830046C22Rik |
| 143525622 | 143837943 | chr5 | 143664794 | 143668403 | Actb          |
| 143525622 | 143837943 | chr5 | 143722033 | 143734868 | Fscn1         |
| 143525622 | 143837943 | chr5 | 143200557 | 143579066 | Tnrc18        |
| 143525622 | 143837943 | chr5 | 143516533 | 143579066 | Tnrc18        |
| 143525622 | 143837943 | chr5 | 143752571 | 143874699 | Rnf216        |
| 143525622 | 143837943 | chr5 | 143633467 | 143656917 | Fbxl18        |



|           |           |      |           |           |               |
|-----------|-----------|------|-----------|-----------|---------------|
| 148138179 | 148783065 | chr7 | 148140737 | 148141860 | Ifitm2        |
| 148138179 | 148783065 | chr7 | 148153327 | 148155726 | Ifitm1        |
| 148138179 | 148783065 | chr7 | 148195488 | 148196643 | Ifitm3        |
| 148138179 | 148783065 | chr7 | 148201710 | 148202791 | Ifitm6        |
| 148138179 | 148783065 | chr7 | 148247172 | 148258018 | B4galnt4      |
| 148138179 | 148783065 | chr7 | 148277073 | 148286445 | Sigirr        |
| 148138179 | 148783065 | chr7 | 148375832 | 148379903 | Hras1         |
| 148138179 | 148783065 | chr7 | 148395941 | 148399979 | 1600016N20Rik |
| 148138179 | 148783065 | chr7 | 148401758 | 148404557 | Rassf7        |
| 148138179 | 148783065 | chr7 | 148407282 | 148407392 | Mir210        |
| 148138179 | 148783065 | chr7 | 148449081 | 148452323 | Irf7          |
| 148138179 | 148783065 | chr7 | 148464227 | 148465032 | Sct           |
| 148138179 | 148783065 | chr7 | 148477904 | 148480900 | Drd4          |
| 148138179 | 148783065 | chr7 | 148545076 | 148551009 | B230206H07Rik |
| 148138179 | 148783065 | chr7 | 148594082 | 148600024 | Pddc1         |
| 148138179 | 148783065 | chr7 | 148612349 | 148615319 | Cend1         |
| 148138179 | 148783065 | chr7 | 148624413 | 148629254 | Lrdd          |
| 148138179 | 148783065 | chr7 | 148634701 | 148634835 | Snora52       |
| 148138179 | 148783065 | chr7 | 148641086 | 148646642 | Pnpla2        |
| 148138179 | 148783065 | chr7 | 148653260 | 148657380 | Cd151         |
| 148138179 | 148783065 | chr7 | 148657758 | 148661052 | Polr2l        |
| 148138179 | 148783065 | chr7 | 148264127 | 148276409 | Pkp3          |
| 148138179 | 148783065 | chr7 | 148287117 | 148303705 | Ano9          |
| 148138179 | 148783065 | chr7 | 148317184 | 148342053 | Ptdss2        |
| 148138179 | 148783065 | chr7 | 148346224 | 148358750 | Rnh1          |
| 148138179 | 148783065 | chr7 | 148380028 | 148395954 | Lrrc56        |
| 148138179 | 148783065 | chr7 | 148414686 | 148448650 | Phrf1         |
| 148138179 | 148783065 | chr7 | 148454983 | 148462685 | Cdhr5         |
| 148138179 | 148783065 | chr7 | 148514028 | 148523054 | Tmem80        |
| 148138179 | 148783065 | chr7 | 148524900 | 148548915 | Eps8l2        |
| 148138179 | 148783065 | chr7 | 148578058 | 148588875 | Taldo1        |
| 148138179 | 148783065 | chr7 | 148615647 | 148623773 | Slc25a22      |
| 148138179 | 148783065 | chr7 | 148646992 | 148652501 | Efcab4a       |
| 148138179 | 148783065 | chr7 | 148661134 | 148679326 | Tspan4        |
| 148138179 | 148783065 | chr7 | 148679034 | 148725756 | Chid1         |
| 148138179 | 148783065 | chr7 | 148483074 | 148524682 | Deaf1         |
| 148138179 | 148783065 | chr7 | 148633548 | 148637241 | Rplp2         |
| 148138179 | 148783065 | chr7 | 148748078 | 148818910 | Ap2a2         |
| 152118109 | 152521388 | chr7 | 152391722 | 152394024 | 1810010D01Rik |
| 152118109 | 152521388 | chr7 | 152486813 | 152495462 | Mrgprf        |
| 152118109 | 152521388 | chr7 | 152115835 | 152125830 | Ccnd1         |
| 152118109 | 152521388 | chr7 | 152439827 | 152469832 | Tpcn2         |
| 152118109 | 152521388 | chr7 | 152500739 | 152509964 | Mrgprd        |
| 72671952  | 73388816  | chr8 | 72696309  | 72707562  | Tmem161a      |
| 72671952  | 73388816  | chr8 | 72816764  | 72826351  | Ddx49         |
| 72671952  | 73388816  | chr8 | 72897446  | 72905965  | Comp          |
| 72671952  | 73388816  | chr8 | 73007769  | 73011257  | Tmem59l       |

|          |          |      |          |          |               |
|----------|----------|------|----------|----------|---------------|
| 72671952 | 73388816 | chr8 | 73028194 | 73030638 | 2810428115Rik |
| 72671952 | 73388816 | chr8 | 73032164 | 73034266 | Uba52         |
| 72671952 | 73388816 | chr8 | 73118379 | 73121189 | Isyna1        |
| 72671952 | 73388816 | chr8 | 73140742 | 73144749 | Lrrc25        |
| 72671952 | 73388816 | chr8 | 73197129 | 73202651 | Lsm4          |
| 72671952 | 73388816 | chr8 | 73221637 | 73224515 | Jund          |
| 72671952 | 73388816 | chr8 | 73242441 | 73246534 | Gm3336        |
| 72671952 | 73388816 | chr8 | 73278577 | 73282585 | Rab3a         |
| 72671952 | 73388816 | chr8 | 73282547 | 73284820 | Mpv17l2       |
| 72671952 | 73388816 | chr8 | 73286671 | 73290562 | Ifi30         |
| 72671952 | 73388816 | chr8 | 73292079 | 73300611 | Pik3r2        |
| 72671952 | 73388816 | chr8 | 73300760 | 73301505 | 2010320M18Rik |
| 72671952 | 73388816 | chr8 | 73322033 | 73322091 | Mir7240       |
| 72671952 | 73388816 | chr8 | 73359036 | 73363619 | Arrdc2        |
| 72671952 | 73388816 | chr8 | 72676676 | 72691387 | Mef2b         |
| 72671952 | 73388816 | chr8 | 72708238 | 72736180 | Slc25a42      |
| 72671952 | 73388816 | chr8 | 72758124 | 72787004 | Sugp2         |
| 72671952 | 73388816 | chr8 | 72806897 | 72818260 | Homer3        |
| 72671952 | 73388816 | chr8 | 72826683 | 72836889 | Cope          |
| 72671952 | 73388816 | chr8 | 72839673 | 72855487 | Cers1         |
| 72671952 | 73388816 | chr8 | 72839673 | 72855491 | Gdf1          |
| 72671952 | 73388816 | chr8 | 72906256 | 72963472 | Crtc1         |
| 72671952 | 73388816 | chr8 | 72974126 | 73000842 | Klhl26        |
| 72671952 | 73388816 | chr8 | 73017054 | 73027980 | Crif1         |
| 72671952 | 73388816 | chr8 | 73037294 | 73047079 | Kxd1          |
| 72671952 | 73388816 | chr8 | 73051641 | 73059227 | Fkbp8         |
| 72671952 | 73388816 | chr8 | 73063573 | 73116757 | Ell           |
| 72671952 | 73388816 | chr8 | 73121388 | 73132213 | Ssbp4         |
| 72671952 | 73388816 | chr8 | 73153292 | 73155534 | Gdf15         |
| 72671952 | 73388816 | chr8 | 73170334 | 73183637 | Pgpep1        |
| 72671952 | 73388816 | chr8 | 73302015 | 73316332 | Mast3         |
| 72671952 | 73388816 | chr8 | 73332347 | 73345322 | Il12rb1       |
| 72671952 | 73388816 | chr8 | 73365947 | 73380907 | Kcnn1         |
| 72671952 | 73388816 | chr8 | 72744091 | 72758321 | Armc6         |
| 72671952 | 73388816 | chr8 | 72855420 | 72877172 | Upf1          |
| 72671952 | 73388816 | chr8 | 73247962 | 73275075 | Pde4c         |
| 86623399 | 86747889 | chr8 | 86697631 | 86700451 | Nanos3        |
| 86623399 | 86747889 | chr8 | 86702614 | 86702686 | Mir181d       |
| 86623399 | 86747889 | chr8 | 86702771 | 86702860 | Mir181c       |
| 86623399 | 86747889 | chr8 | 86732416 | 86732491 | Mir23a        |
| 86623399 | 86747889 | chr8 | 86732570 | 86732657 | Mir27a        |
| 86623399 | 86747889 | chr8 | 86732713 | 86732820 | Mir24-2       |
| 86623399 | 86747889 | chr8 | 86732723 | 86732806 | Mir3074-2     |
| 86623399 | 86747889 | chr8 | 86620970 | 86628661 | Dcaf15        |
| 86623399 | 86747889 | chr8 | 86649887 | 86656416 | Podnl1        |
| 86623399 | 86747889 | chr8 | 86656726 | 86671652 | Cc2d1a        |
| 86623399 | 86747889 | chr8 | 86671936 | 86696496 | 4930432K21Rik |

|           |           |      |           |           |               |
|-----------|-----------|------|-----------|-----------|---------------|
| 86623399  | 86747889  | chr8 | 86734840  | 86760941  | Zswim4        |
| 87462178  | 87634096  | chr8 | 87480508  | 87489910  | Rnaseh2a      |
| 87462178  | 87634096  | chr8 | 87493546  | 87498212  | Prdx2         |
| 87462178  | 87634096  | chr8 | 87500807  | 87502647  | Junb          |
| 87462178  | 87634096  | chr8 | 87531100  | 87538430  | Best2         |
| 87462178  | 87634096  | chr8 | 87541829  | 87549177  | Asna1         |
| 87462178  | 87634096  | chr8 | 87550731  | 87554185  | 2310036O22Rik |
| 87462178  | 87634096  | chr8 | 87585984  | 87586070  | Mir7070       |
| 87462178  | 87634096  | chr8 | 87591466  | 87591881  | Gm5741        |
| 87462178  | 87634096  | chr8 | 87595655  | 87599060  | Dhps          |
| 87462178  | 87634096  | chr8 | 87598933  | 87604645  | Wdr83         |
| 87462178  | 87634096  | chr8 | 87470889  | 87480502  | Rtbdn         |
| 87462178  | 87634096  | chr8 | 87514493  | 87527263  | Hook2         |
| 87462178  | 87634096  | chr8 | 87560813  | 87581481  | Tnpo2         |
| 87462178  | 87634096  | chr8 | 87584017  | 87591019  | Fbxw9         |
| 87462178  | 87634096  | chr8 | 87604861  | 87606238  | BC056474      |
| 87462178  | 87634096  | chr8 | 87607167  | 87622638  | Man2b1        |
| 87462178  | 87634096  | chr8 | 87633065  | 87646994  | Zfp791        |
| 107804455 | 108414720 | chr8 | 107800346 | 107805839 | Nol3          |
| 107804455 | 108414720 | chr8 | 107813823 | 107819998 | Exoc3l        |
| 107804455 | 108414720 | chr8 | 107829500 | 107834523 | Elmo3         |
| 107804455 | 108414720 | chr8 | 107832263 | 107832360 | Mir328        |
| 107804455 | 108414720 | chr8 | 107850263 | 107852957 | Tmem208       |
| 107804455 | 108414720 | chr8 | 107991391 | 107995322 | Tppp3         |
| 107804455 | 108414720 | chr8 | 108042645 | 108047888 | Hsd11b2       |
| 107804455 | 108414720 | chr8 | 108139365 | 108139473 | Mir1966       |
| 107804455 | 108414720 | chr8 | 108222058 | 108224995 | Acd           |
| 107804455 | 108414720 | chr8 | 108225047 | 108227394 | Pard6a        |
| 107804455 | 108414720 | chr8 | 108227551 | 108232068 | Enkd1         |
| 107804455 | 108414720 | chr8 | 108368577 | 108375908 | Cenpt         |
| 107804455 | 108414720 | chr8 | 107804308 | 107813428 | 4931428F04Rik |
| 107804455 | 108414720 | chr8 | 107821562 | 107829270 | E2f4          |
| 107804455 | 108414720 | chr8 | 107836239 | 107850176 | Lrrc29        |
| 107804455 | 108414720 | chr8 | 107853059 | 107871870 | Fhod1         |
| 107804455 | 108414720 | chr8 | 107899280 | 107906762 | Plekhg4       |
| 107804455 | 108414720 | chr8 | 107906711 | 107937387 | Kctd19        |
| 107804455 | 108414720 | chr8 | 107937521 | 107987986 | Lrrc36        |
| 107804455 | 108414720 | chr8 | 108048369 | 108089940 | Atp6v0d1      |
| 107804455 | 108414720 | chr8 | 108090594 | 108103745 | Agrp          |
| 107804455 | 108414720 | chr8 | 108160437 | 108206822 | Ctcf          |
| 107804455 | 108414720 | chr8 | 108214805 | 108222065 | Rltpr         |
| 107804455 | 108414720 | chr8 | 108232202 | 108234068 | 4933405L10Rik |
| 107804455 | 108414720 | chr8 | 108292207 | 108351250 | Ranbp10       |
| 107804455 | 108414720 | chr8 | 108351643 | 108368576 | Tsnaxip1      |
| 107804455 | 108414720 | chr8 | 108379002 | 108380850 | Thap11        |
| 107804455 | 108414720 | chr8 | 108404850 | 108417107 | Edc4          |
| 107804455 | 108414720 | chr8 | 107872157 | 107893781 | Slc9a5        |

|           |           |      |           |           |               |
|-----------|-----------|------|-----------|-----------|---------------|
| 107804455 | 108414720 | chr8 | 108129128 | 108146118 | Fam65a        |
| 107804455 | 108414720 | chr8 | 108240012 | 108282507 | Gfod2         |
| 107804455 | 108414720 | chr8 | 108384533 | 108404301 | Nutf2         |
| 107804455 | 108414720 | chr8 | 108384559 | 108403237 | Nutf2-ps1     |
| 107804455 | 108414720 | chr8 | 107996324 | 108020770 | Zdhhc1        |
| 108524497 | 108960178 | chr8 | 108533515 | 108535386 | Ddx28         |
| 108524497 | 108960178 | chr8 | 108659299 | 108662622 | 1810019D21Rik |
| 108524497 | 108960178 | chr8 | 108724337 | 108734833 | Slc7a6os      |
| 108524497 | 108960178 | chr8 | 108939238 | 108949789 | Zfp90         |
| 108524497 | 108960178 | chr8 | 108535406 | 108577719 | Dus2          |
| 108524497 | 108960178 | chr8 | 108583502 | 108654437 | Nfatc3        |
| 108524497 | 108960178 | chr8 | 108674298 | 108688615 | Pla2g15       |
| 108524497 | 108960178 | chr8 | 108692774 | 108722604 | Slc7a6        |
| 108524497 | 108960178 | chr8 | 108734953 | 108775594 | Prmt7         |
| 108524497 | 108960178 | chr8 | 108655082 | 108660874 | Esrp2         |
| 108524497 | 108960178 | chr8 | 108776447 | 108861888 | Smpd3         |
| 109343751 | 110048624 | chr8 | 109570189 | 109572514 | Pdf           |
| 109343751 | 110048624 | chr8 | 109580776 | 109584828 | Nip7          |
| 109343751 | 110048624 | chr8 | 109585383 | 109589544 | Tmed6         |
| 109343751 | 110048624 | chr8 | 109619924 | 109620006 | Mir7075       |
| 109343751 | 110048624 | chr8 | 109394141 | 109406802 | Has3          |
| 109343751 | 110048624 | chr8 | 109407762 | 109417493 | Chtf8         |
| 109343751 | 110048624 | chr8 | 109459649 | 109538092 | Sntb2         |
| 109343751 | 110048624 | chr8 | 109555225 | 109569656 | Vps4a         |
| 109343751 | 110048624 | chr8 | 109593301 | 109620445 | Terf2         |
| 109343751 | 110048624 | chr8 | 109912124 | 109927105 | Nqo1          |
| 109343751 | 110048624 | chr8 | 109936388 | 109948938 | Nob1          |
| 109343751 | 110048624 | chr8 | 109206967 | 109375339 | Tango6        |
| 109343751 | 110048624 | chr8 | 109417539 | 109446994 | Cirh1a        |
| 109343751 | 110048624 | chr8 | 109572608 | 109580637 | Cog8          |
| 109343751 | 110048624 | chr8 | 109674560 | 109711370 | Cyb5b         |
| 109343751 | 110048624 | chr8 | 109817369 | 109903417 | Nfat5         |
| 109343751 | 110048624 | chr8 | 109960297 | 110082495 | Wwp2          |
| 122241891 | 123302144 | chr8 | 123062595 | 123062654 | Mir7687       |
| 122241891 | 123302144 | chr8 | 123192189 | 123198109 | Cox4i1        |
| 122241891 | 123302144 | chr8 | 122223908 | 122281618 | Atp2c2        |
| 122241891 | 123302144 | chr8 | 122333113 | 122364479 | Cotl1         |
| 122241891 | 123302144 | chr8 | 122386204 | 122400889 | Klhl36        |
| 122241891 | 123302144 | chr8 | 122434751 | 122481457 | Usp10         |
| 122241891 | 123302144 | chr8 | 122604994 | 122625372 | Zdhhc7        |
| 122241891 | 123302144 | chr8 | 122690296 | 122701369 | Fam92b        |
| 122241891 | 123302144 | chr8 | 123105165 | 123112975 | Gins2         |
| 122241891 | 123302144 | chr8 | 123132501 | 123158282 | 1190005I06Rik |
| 122241891 | 123302144 | chr8 | 123177813 | 123192012 | Emc8          |
| 122241891 | 123302144 | chr8 | 123260275 | 123280592 | Irf8          |
| 122241891 | 123302144 | chr8 | 122284486 | 122302316 | Tldc1         |
| 122241891 | 123302144 | chr8 | 122516369 | 122576693 | Crispld2      |

|           |           |      |           |           |               |
|-----------|-----------|------|-----------|-----------|---------------|
| 122241891 | 123302144 | chr8 | 123012765 | 123105283 | Gse1          |
| 122241891 | 123302144 | chr8 | 122638051 | 122689207 | 6430548M08Rik |
| 123653069 | 124087397 | chr8 | 123651584 | 123654544 | Foxl1         |
| 123653069 | 124087397 | chr8 | 124068287 | 124071552 | 1700030M09Rik |
| 123653069 | 124087397 | chr8 | 124054683 | 124065854 | 1700018B08Rik |
| 123653069 | 124087397 | chr8 | 124073342 | 124102706 | Fbxo31        |
| 124385418 | 124664833 | chr8 | 124501923 | 124501986 | Mir7237       |
| 124385418 | 124664833 | chr8 | 124405045 | 124431586 | Slc7a5        |
| 124385418 | 124664833 | chr8 | 124431732 | 124442328 | BC048644      |
| 124385418 | 124664833 | chr8 | 124440043 | 124468812 | Car5a         |
| 124385418 | 124664833 | chr8 | 124474391 | 124553160 | Banp          |
| 124860631 | 125265544 | chr8 | 124880866 | 124884646 | Trhr2         |
| 124860631 | 125265544 | chr8 | 124945984 | 124947539 | Il17c         |
| 124860631 | 125265544 | chr8 | 124948670 | 124956840 | Cyba          |
| 124860631 | 125265544 | chr8 | 124967555 | 124970376 | 9330133O14Rik |
| 124860631 | 125265544 | chr8 | 124969167 | 124975222 | Gm20735       |
| 124860631 | 125265544 | chr8 | 124978105 | 124984592 | Snai3         |
| 124860631 | 125265544 | chr8 | 125000042 | 125006992 | Ctu2          |
| 124860631 | 125265544 | chr8 | 125091914 | 125097030 | Cdt1          |
| 124860631 | 125265544 | chr8 | 125098536 | 125100807 | Aprt          |
| 124860631 | 125265544 | chr8 | 125135525 | 125139491 | Trappc2l      |
| 124860631 | 125265544 | chr8 | 125143370 | 125146635 | Pabpn1l       |
| 124860631 | 125265544 | chr8 | 125146164 | 125146275 | Mir6396       |
| 124860631 | 125265544 | chr8 | 124806040 | 124861147 | Zfpm1         |
| 124860631 | 125265544 | chr8 | 124957495 | 124967322 | Mvd           |
| 124860631 | 125265544 | chr8 | 124990046 | 124999964 | Rnf166        |
| 124860631 | 125265544 | chr8 | 125102136 | 125135387 | Galns         |
| 124860631 | 125265544 | chr8 | 124900515 | 124941260 | Zc3h18        |
| 124860631 | 125265544 | chr8 | 125005597 | 125075229 | Piezo1        |
| 124860631 | 125265544 | chr8 | 125149035 | 125223009 | Cbfa2t3       |
| 125418966 | 126680898 | chr8 | 125626249 | 125629142 | Rpl13         |
| 125418966 | 126680898 | chr8 | 125626957 | 125627005 | Snord68       |
| 125418966 | 126680898 | chr8 | 125628874 | 125628943 | Mir7079       |
| 125418966 | 126680898 | chr8 | 125654005 | 125654072 | Mir7080       |
| 125418966 | 126680898 | chr8 | 125736757 | 125745945 | Spata33       |
| 125418966 | 126680898 | chr8 | 125748740 | 125756156 | Cdk10         |
| 125418966 | 126680898 | chr8 | 125756157 | 125760109 | Spata2l       |
| 125418966 | 126680898 | chr8 | 125766255 | 125778075 | Vps9d1        |
| 125418966 | 126680898 | chr8 | 125930981 | 125934647 | Mc1r          |
| 125418966 | 126680898 | chr8 | 126028617 | 126039355 | Dbnnd1        |
| 125418966 | 126680898 | chr8 | 126177828 | 126187780 | Rhou          |
| 125418966 | 126680898 | chr8 | 126257857 | 126263841 | 6030466F02Rik |
| 125418966 | 126680898 | chr8 | 126415657 | 126418675 | Acta1         |
| 125418966 | 126680898 | chr8 | 126546540 | 126546622 | Mir1967       |
| 125418966 | 126680898 | chr8 | 125589407 | 125621651 | Spg7          |
| 125418966 | 126680898 | chr8 | 125641273 | 125659085 | Cpne7         |
| 125418966 | 126680898 | chr8 | 125666746 | 125682180 | Sult5a1       |

|           |           |      |           |           |               |
|-----------|-----------|------|-----------|-----------|---------------|
| 125418966 | 126680898 | chr8 | 125710134 | 125725713 | Dpep1         |
| 125418966 | 126680898 | chr8 | 125728160 | 125736688 | Chmp1a        |
| 125418966 | 126680898 | chr8 | 125758990 | 125766259 | 4933417D19Rik |
| 125418966 | 126680898 | chr8 | 125778094 | 125794451 | Zfp276        |
| 125418966 | 126680898 | chr8 | 125856612 | 125893418 | Spire2        |
| 125418966 | 126680898 | chr8 | 125897610 | 125928074 | Tcf25         |
| 125418966 | 126680898 | chr8 | 125935463 | 125945910 | Tubb3         |
| 125418966 | 126680898 | chr8 | 125966855 | 125987799 | Def8          |
| 125418966 | 126680898 | chr8 | 126001761 | 126027816 | Afg3l1        |
| 125418966 | 126680898 | chr8 | 126042734 | 126060550 | Gas8          |
| 125418966 | 126680898 | chr8 | 126364743 | 126384109 | Ccsap         |
| 125418966 | 126680898 | chr8 | 126421022 | 126473165 | Nup133        |
| 125418966 | 126680898 | chr8 | 126520215 | 126545209 | Taf5l         |
| 125418966 | 126680898 | chr8 | 126547372 | 126572404 | Urb2          |
| 125418966 | 126680898 | chr8 | 125407721 | 125566184 | Ankrd11       |
| 125418966 | 126680898 | chr8 | 125566474 | 125568502 | 2810013P06Rik |
| 125418966 | 126680898 | chr8 | 126329895 | 126359191 | Rab4a         |
| 125418966 | 126680898 | chr8 | 126476358 | 126507022 | Abcb10        |
| 125418966 | 126680898 | chr8 | 125792143 | 125842476 | Fanca         |
| 127127313 | 127243367 | chr8 | 127159655 | 127187269 | 2310022B05Rik |
| 127127313 | 127243367 | chr8 | 127195226 | 127245875 | Ttc13         |
| 127127313 | 127243367 | chr8 | 127100010 | 127142631 | Capn9         |
| 127886621 | 128304909 | chr8 | 128193717 | 128197265 | Map10         |
| 127886621 | 128304909 | chr8 | 127941962 | 128016610 | Sipa1l2       |
| 127886621 | 128304909 | chr8 | 128108537 | 128140570 | 4930567H12Rik |
| 127886621 | 128304909 | chr8 | 128258102 | 128272135 | Ntpcr         |
| 127886621 | 128304909 | chr8 | 128275407 | 128422217 | Pcnxl2        |
| 128995722 | 129518639 | chr8 | 129112195 | 129117336 | Irf2bp2       |
| 128995722 | 129518639 | chr8 | 129454563 | 129469821 | Tomm20        |
| 128995722 | 129518639 | chr8 | 129471072 | 129494979 | Rbm34         |
| 128995722 | 129518639 | chr8 | 128950551 | 128998965 | Gm17296       |
| 65011371  | 65260962  | chr9 | 65193874  | 65207450  | Pdcd7         |
| 65011371  | 65260962  | chr9 | 65236490  | 65239459  | Kbtbd13       |
| 65011371  | 65260962  | chr9 | 65260559  | 65270580  | Slc51b        |
| 65011371  | 65260962  | chr9 | 65062496  | 65087026  | Parp16        |
| 65011371  | 65260962  | chr9 | 65112986  | 65128412  | Cilp          |
| 65011371  | 65260962  | chr9 | 65208866  | 65228184  | Gm514         |
| 65011371  | 65260962  | chr9 | 65246294  | 65262660  | Rasl12        |
| 65011371  | 65260962  | chr9 | 65142066  | 65178465  | Clpx          |
| 65011371  | 65260962  | chr9 | 64988995  | 65033677  | Igdcc3        |
| 66692272  | 66876200  | chr9 | 66793924  | 66797316  | Rps27l        |
| 66692272  | 66876200  | chr9 | 66803199  | 66823291  | Lactb         |
| 66692272  | 66876200  | chr9 | 66870399  | 66897020  | Tpm1          |
| 66692272  | 66876200  | chr9 | 66691470  | 66767512  | Rab8b         |
